# Supplementary material for: Genome-wide identification of gene families related to miRNA biogenesis in Mangifera indica L. and their possible role during heat stress
Source: PeerJ journal article supplement (doi:10.7717/peerj.17737), 2024-07-17
Supplement: FigS1.pdf [file FigS1.pdf]

**A**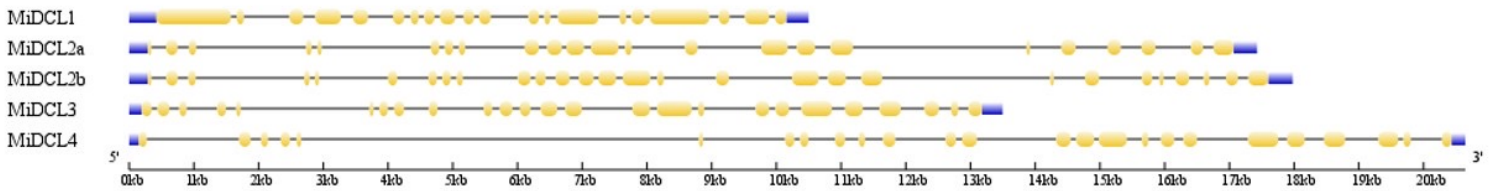**B**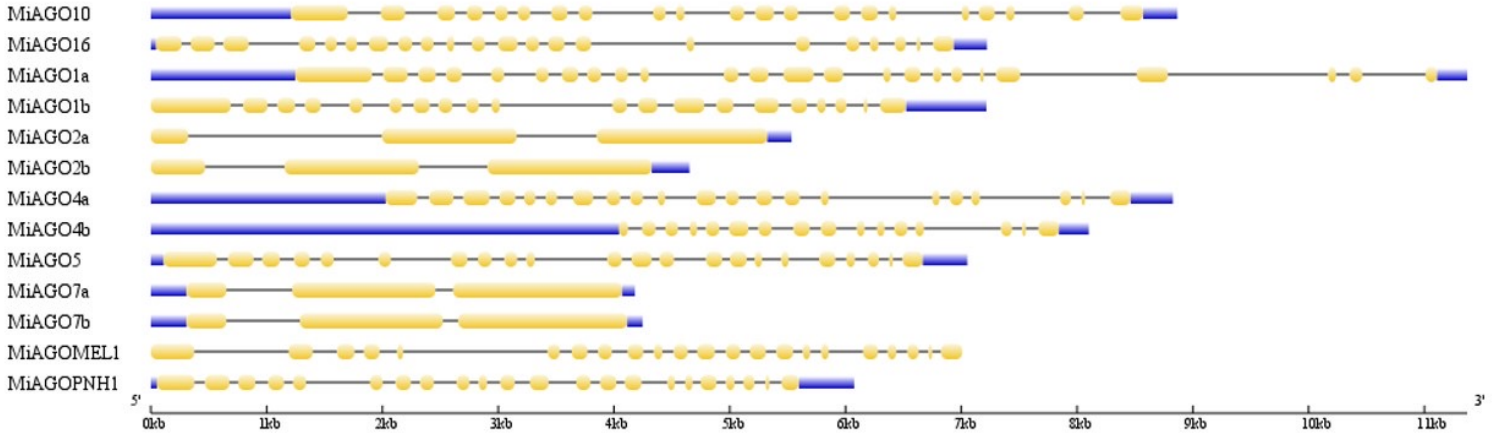**C**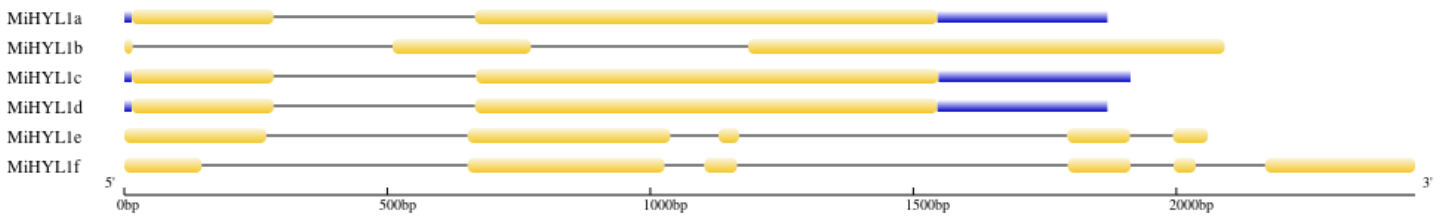**D**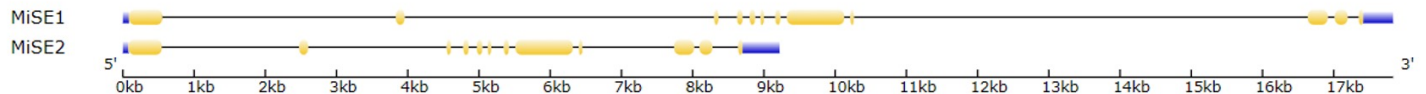**E**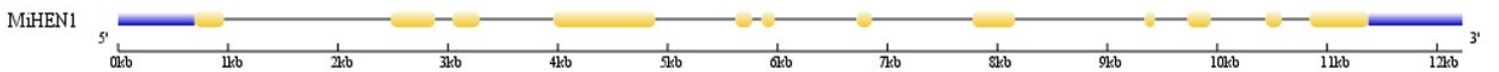**F**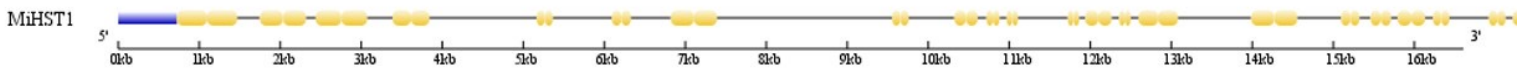**G**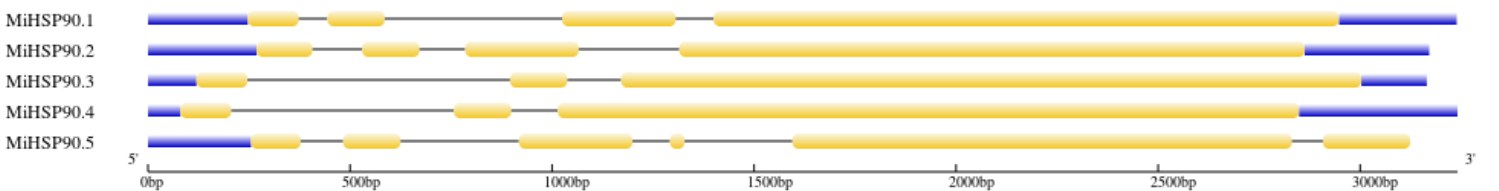

Legend:

CDS
  upstream/ downstream
  Intron
