# Supplementary material for: Genome-wide identification of gene families related to miRNA biogenesis in Mangifera indica L. and their possible role during heat stress
Source: PeerJ journal article supplement (doi:10.7717/peerj.17737), 2024-07-17
Supplement: FigS2.pdf [file FigS2.pdf]

A

## AtHSP90.2

| Predicted NLSs in query sequence                   |     |
|----------------------------------------------------|-----|
| HSPATHALIANATARATGADAEETFAFQAIEINQLLSLIINTFYSNKEIF | 50  |
| LRELISNSSDVRSLSTLTYCVSRLLDADGSDVGLGALDKIRFESLT     | 100 |
| DKSKLDGQPELFIHZIPKNTWLTZIDSGGTAKADLVNMLDZARSOT     | 150 |
| KEFHAAAGADSVHIGQGVGFYSALVADKVVVTKHNDQYVHESQ        | 200 |
| AGGSFTVTRDTSGETLGRGTHVLYLKEDELVEERRKLDVKKHSFEI     | 250 |
| SYPISLIEZKTZEKISDDEEEKKEDEKGVVEEDKEEKEKKKKIK       | 300 |
| EVSHEDLVNKKQPIHPRKEEENKEEYAFYKSLSDNHEHLAVKHFSV     | 350 |
| EQGLFEKAILFVKRAPPDLFDTKKPNKILVYRVFIDNDCEDZIPE      | 400 |
| LGFVKGVDSDLPNLSRHTLQQNKILKVRKRNKLVKCLLFFEAEN       | 450 |
| EDYVNFYFAFNSKLNKLGIDHESQWRTILAEILLRHSKSGDELSTLIDVY | 500 |
| TRPKEGQDIFVITGESKAVENSPFLERLKKKGEVLVYWDADYEZIG     | 550 |
| QLKEFGKILVSATKGLKDETEDEKKKELKKEKFGGLCKIVDILGD      | 600 |
| KVEKIVSDRVVSDPCLVTGEYGHANMERIKAKQALRDSHAGVHSSK     | 650 |
| KTHEINPENSINDELKRADAKNDKSVKDLVLLFPETALLSGFSLDEP    | 700 |
| NFTGSRHRLKGLSDDDDAVEADAPPLLEDDADGSEKIEIVD          | 747 |

## MiHSP90.3

| Predicted NLSs in query sequence                 |     |
|--------------------------------------------------|-----|
| MHSPHAAETETFAFQAIEINQLLSLIINTFYSNKEIFRELISNADSLD | 50  |
| KIRFESLTKSKLDGQPELFIHZIPKNTWLTZIDSGGTAKADLVNML   | 100 |
| GTZARSOTKEFHAAAGADSVHIGQGVGFYSALVADKVVVTKHNDQ    | 150 |
| EQYVHESQAGGSFTVTRDTSGETLGRGTHVLYLKEDELVEERRKLD   | 200 |
| IKKHSFEISYPSLIEZKTZEKISDDEEEKKEDEKGVVEEDKEEKE    | 250 |
| EKKKKIKVEVSHEDLVNKKQPIHPRKEEENKEEYAFYKSLNDWEEH   | 300 |
| LAVKHFSVEQGLFEKAILFVKRAPPDLFDTRKPNKILVYRVFIDN    | 350 |
| CEELIPEYLSFVKGVDSDLPNLSRHTLQQNKILKVRKRNKLVKCL    | 400 |
| FFEAENKEDYVNFYFAFNSKLNKLGIDHESQWRTILAEILLRHSKSG  | 450 |
| DELSTLIDVYTRPKEGQDIFVITGESKAVENSPFLERLKKKGEVLV   | 500 |
| YWDADYEZIGQLKEFGKILVSATKGLKDETEDEKKKELKKEKFGGL   | 550 |
| CKIVDILGDKVEKIVSDRVVSDPCLVTGEYGHANMERIKAKQALRDS  | 600 |
| HAGVHSSKKTHEINPENSINDELKRADAKNDKSVKDLVLLFPETALL  | 650 |
| SGFSLDDPNTGSRHRIHRLKGLSDDDDAVEADAPPLLEAADDGSEK   | 700 |
| EIVD                                             | 704 |

| Predicted monopartite NLS |                             |       |
|---------------------------|-----------------------------|-------|
| Pos.                      | Sequence                    | Score |
| 402                       | GFVKGVDSDLPNLSRHTLQQNKILKVI | 6.3   |

| Predicted monopartite NLS |                            |       |
|---------------------------|----------------------------|-------|
| Pos.                      | Sequence                   | Score |
| 361                       | FVKGVDSDLPNLSRHTLQQNKILKVI | 6.1   |

| Predicted bipartite NLS |                             |       |
|-------------------------|-----------------------------|-------|
| Pos.                    | Sequence                    | Score |
| 402                     | GFVKGVDSDLPNLSRHTLQQNKILKVI | 6.3   |

| Predicted bipartite NLS |                            |       |
|-------------------------|----------------------------|-------|
| Pos.                    | Sequence                   | Score |
| 361                     | FVKGVDSDLPNLSRHTLQQNKILKVI | 6.1   |

B

## AtHSP90.2

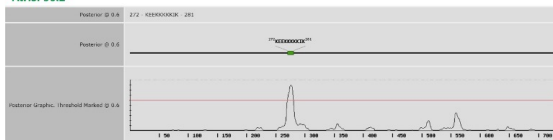

## MiHSP90.3

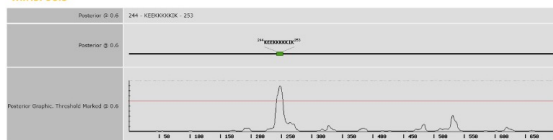

C

## AtHSP90.2

The NucPRed score for your sequence is 0.46 (see <https://www.ncbi.nlm.nih.gov/pmc/articles/PMC1111111/> below)

|     |                                                    |     |
|-----|----------------------------------------------------|-----|
| 1   | MADAEETFAFQAIEINQLLSLIINTFYSNKEIFRELISNADSLD       | 50  |
| 51  | LTYCVSRLLDADGSDVGLGALDKIRFESLT                     | 100 |
| 101 | DKSKLDGQPELFIHZIPKNTWLTZIDSGGTAKADLVNMLDZARSOT     | 150 |
| 151 | KEFHAAAGADSVHIGQGVGFYSALVADKVVVTKHNDQYVHESQ        | 200 |
| 201 | AGGSFTVTRDTSGETLGRGTHVLYLKEDELVEERRKLDVKKHSFEI     | 250 |
| 251 | SYPISLIEZKTZEKISDDEEEKKEDEKGVVEEDKEEKEKKKKIK       | 300 |
| 301 | EVSHEDLVNKKQPIHPRKEEENKEEYAFYKSLSDNHEHLAVKHFSV     | 350 |
| 351 | EQGLFEKAILFVKRAPPDLFDTKKPNKILVYRVFIDNDCEDZIPE      | 400 |
| 401 | LGFVKGVDSDLPNLSRHTLQQNKILKVRKRNKLVKCLLFFEAEN       | 450 |
| 451 | EDYVNFYFAFNSKLNKLGIDHESQWRTILAEILLRHSKSGDELSTLIDVY | 500 |
| 501 | TRPKEGQDIFVITGESKAVENSPFLERLKKKGEVLVYWDADYEZIG     | 550 |
| 551 | QLKEFGKILVSATKGLKDETEDEKKKELKKEKFGGLCKIVDILGD      | 600 |
| 601 | KVEKIVSDRVVSDPCLVTGEYGHANMERIKAKQALRDSHAGVHSSK     | 650 |
| 651 | KTHEINPENSINDELKRADAKNDKSVKDLVLLFPETALLSGFSLDEP    | 700 |
| 701 | NFTGSRHRLKGLSDDDDAVEADAPPLLEDDADGSEKIEIVD          | 750 |

## MiHSP90.3

The NucPRed score for your sequence is 0.51 (see <https://www.ncbi.nlm.nih.gov/pmc/articles/PMC1111111/> below)

|     |                                                    |     |
|-----|----------------------------------------------------|-----|
| 1   | MADAEETFAFQAIEINQLLSLIINTFYSNKEIFRELISNADSLD       | 50  |
| 51  | LTYCVSRLLDADGSDVGLGALDKIRFESLT                     | 100 |
| 101 | DKSKLDGQPELFIHZIPKNTWLTZIDSGGTAKADLVNMLDZARSOT     | 150 |
| 151 | KEFHAAAGADSVHIGQGVGFYSALVADKVVVTKHNDQYVHESQ        | 200 |
| 201 | AGGSFTVTRDTSGETLGRGTHVLYLKEDELVEERRKLDVKKHSFEI     | 250 |
| 251 | SYPISLIEZKTZEKISDDEEEKKEDEKGVVEEDKEEKEKKKKIK       | 300 |
| 301 | EVSHEDLVNKKQPIHPRKEEENKEEYAFYKSLSDNHEHLAVKHFSV     | 350 |
| 351 | EQGLFEKAILFVKRAPPDLFDTKKPNKILVYRVFIDNDCEDZIPE      | 400 |
| 401 | LGFVKGVDSDLPNLSRHTLQQNKILKVRKRNKLVKCLLFFEAEN       | 450 |
| 451 | EDYVNFYFAFNSKLNKLGIDHESQWRTILAEILLRHSKSGDELSTLIDVY | 500 |
| 501 | TRPKEGQDIFVITGESKAVENSPFLERLKKKGEVLVYWDADYEZIG     | 550 |
| 551 | QLKEFGKILVSATKGLKDETEDEKKKELKKEKFGGLCKIVDILGD      | 600 |
| 601 | KVEKIVSDRVVSDPCLVTGEYGHANMERIKAKQALRDSHAGVHSSK     | 650 |
| 651 | KTHEINPENSINDELKRADAKNDKSVKDLVLLFPETALLSGFSLDEP    | 700 |
| 701 | NFTGSRHRLKGLSDDDDAVEADAPPLLEAADDGSEKIEIVD          | 750 |

Positively and negatively influencing subsequences are coloured according to the following scale:

(non-nuclear) negative (non-nuclear) positive (nuclear)
