# Supplementary material for: Genome-wide identification of gene families related to miRNA biogenesis in Mangifera indica L. and their possible role during heat stress
Source: PeerJ journal article supplement (doi:10.7717/peerj.17737), 2024-07-17
Supplement: FigS3.pdf [file FigS3.pdf]

|          |     |      |       |          |      |       |           |       |     |         |       |       |         |        |     |     |   |   |   |       |   |   |   |   |   |   |   |   |   |   |       |   |       |   |       |      |     |   |   |   |   |   |   |       |       |       |       |         |        |      |       |   |   |       |       |       |       |    |       |   |   |   |   |   |       |   |   |   |   |   |   |   |   |   |   |   |   |   |   |   |   |   |   |   |   |   |   |   |   |   |   |   |   |   |   |   |   |   |   |   |   |   |   |   |   |   |   |   |   |   |   |   |   |   |   |   |
|----------|-----|------|-------|----------|------|-------|-----------|-------|-----|---------|-------|-------|---------|--------|-----|-----|---|---|---|-------|---|---|---|---|---|---|---|---|---|---|-------|---|-------|---|-------|------|-----|---|---|---|---|---|---|-------|-------|-------|-------|---------|--------|------|-------|---|---|-------|-------|-------|-------|----|-------|---|---|---|---|---|-------|---|---|---|---|---|---|---|---|---|---|---|---|---|---|---|---|---|---|---|---|---|---|---|---|---|---|---|---|---|---|---|---|---|---|---|---|---|---|---|---|---|---|---|---|---|---|---|---|---|---|---|
|          | 660 | 670  | 680   | 690      | 700  | 710   | 720       | 730   | 740 | 750     | 760   | 770   | 780     |        |     |     |   |   |   |       |   |   |   |   |   |   |   |   |   |   |       |   |       |   |       |      |     |   |   |   |   |   |   |       |       |       |       |         |        |      |       |   |   |       |       |       |       |    |       |   |   |   |   |   |       |   |   |   |   |   |   |   |   |   |   |   |   |   |   |   |   |   |   |   |   |   |   |   |   |   |   |   |   |   |   |   |   |   |   |   |   |   |   |   |   |   |   |   |   |   |   |   |   |   |   |   |
| AtDCL4   | GAI | CAAK | ----- | IQLNSDHN | VQDE | ---   | PVGKNPKSK | ICDT  | YL  | SMAAEAL | SSGVA | ----- | KD----- | EN---- | ASD | --- | L | S | L | A     | A | K | E | P | L | F | S | R | L | V | Q     | L | I     | K | I     | L    | S   | V | I | R | L |   |   |       |       |       |       |         |        |      |       |   |   |       |       |       |       |    |       |   |   |   |   |   |       |   |   |   |   |   |   |   |   |   |   |   |   |   |   |   |   |   |   |   |   |   |   |   |   |   |   |   |   |   |   |   |   |   |   |   |   |   |   |   |   |   |   |   |   |   |   |   |   |   |   |   |
| MidDCL4  | GAR | L    | F     | Y        | L    | L     | L         | K     | A   | I       | D     | S     | L       | S      | G   | D   | P | S | V | R     | N | E | L | I | E | A | E | G | N | S | M     | D | D     | T | C     | -    | R   | Y | L | S | Q | A | A | E     | V     | F     | A     | S       | A      | F    | T     |   |   |       |       |       |       |    |       |   |   |   |   |   |       |   |   |   |   |   |   |   |   |   |   |   |   |   |   |   |   |   |   |   |   |   |   |   |   |   |   |   |   |   |   |   |   |   |   |   |   |   |   |   |   |   |   |   |   |   |   |   |   |   |   |   |
| SIDCL4   | GAL | CA   | ----- | SC       | I    | L     | L         | K     | G   | D       | H     | H     | E       | R      | H   | Q   | M | V | E | A     | E | V | N | A | S | D | D | S | L | C | D     | R | Y     | L | S     | Q    | V   | D | T | V | F | T | S | G     | C     | A     | ----- | KD----- | GM---- | NPD  | ---   | A | L | M     | E     | V     | I     | K  | E     | P | Y | F | S | K | L     | R | L | I | G | I | L | S | N | E | G | V |   |   |   |   |   |   |   |   |   |   |   |   |   |   |   |   |   |   |   |   |   |   |   |   |   |   |   |   |   |   |   |   |   |   |   |   |   |   |   |   |
| SIDCL2d  | LAF | K    | S     | C        | E    | ----- | END       | ----- | F   | L       | S     | ----- | DDAC    | V      | R   | D   | I | C | L | G     | A | S | T | I | F | S | A | H | I | P | ----- | S | ----- | S | ----- | GP-- | HWS | I | G | G | D | I | C | A     | N     | V     | D     | A       | C      | Y    | L     | S | S | K     | V     | N     | C     | L  | E     | S | L | L | E | Y | R     | D |   |   |   |   |   |   |   |   |   |   |   |   |   |   |   |   |   |   |   |   |   |   |   |   |   |   |   |   |   |   |   |   |   |   |   |   |   |   |   |   |   |   |   |   |   |   |   |   |   |   |
| SIDCL2c  | LAF | K    | A     | A        | E    | F     | L         | S     | Q   | E       | T     | D     | -----   | F      | S   | W   | G | E | L | D     | V | C | A | Q | T | I | V | R | D | I | S     | S | D     | A | S     | K    | V   | F | S | A | C | I | P | ----- | S     | ----- | GP--  | HWS     | I      | G    | G     | D | I | C     | A     | N     | T     | D  | A     | C | Y | L | S | S | K     | V | H | C | L | E | S | L | L | E | Y | R | N |   |   |   |   |   |   |   |   |   |   |   |   |   |   |   |   |   |   |   |   |   |   |   |   |   |   |   |   |   |   |   |   |   |   |   |   |   |   |   |
| SIDCL2a  | LAF | K    | A     | T        | E    | F     | L         | S     | R   | E       | E     | V     | D       | -----  | F   | L   | S | W | G | E     | L | D | V | C | A | Q | T | I | V | R | D     | I | S     | S | W     | G    | A   | S | K | I | F | S | A | R     | I     | P     | ----- | S       | -----  | GP-- | YWS   | I | G | G     | D     | I     | C     | A  | N     | V | D | A | C | Y | L     | S | S | K | V | A | T | C | L | E | S | L | L | E | Y | R | D |   |   |   |   |   |   |   |   |   |   |   |   |   |   |   |   |   |   |   |   |   |   |   |   |   |   |   |   |   |   |   |   |   |   |   |
| SIDCL2b  | LAF | K    | A     | A        | E    | F     | L         | S     | F   | E       | E     | N     | D       | -----  | F   | F   | S | W | G | E     | F | D | C | A | Q | T | I | V | R | D | I     | S | S     | L | G     | A    | S   | K | I | F | S | A | R | I     | P     | ----- | S     | -----   | GP--   | HWS  | I     | G | G | D     | I     | C     | A     | N  | A     | D | A | C | Y | L | S     | S | K | V | N | C | L | E | S | L | L | E | Y | R | D |   |   |   |   |   |   |   |   |   |   |   |   |   |   |   |   |   |   |   |   |   |   |   |   |   |   |   |   |   |   |   |   |   |   |   |   |   |
| AtDCL2   | LAK | Q    | A     | A        | Q    | S     | L         | S     | A   | S       | Q     | N     | D       | -----  | S   | F   | L | W | G | E     | L | N | M | F | S | V | A | L | V | K | K     | I | C     | S | D     | A    | S   | Q | E | F | L | A | E | I     | P     | ----- | Q     | -----   | GL--   | NWS  | V     | A | N | -     | I     | N     | G     | N  | A     | E | A | C | L | L | I     | T | V | Q | L | E | S | L | L | E | Y | S | S |   |   |   |   |   |   |   |   |   |   |   |   |   |   |   |   |   |   |   |   |   |   |   |   |   |   |   |   |   |   |   |   |   |   |   |   |   |   |   |
| MidDCL2a | LAK | Q    | A     | A        | Q    | S     | L         | S     | R   | Y       | E     | N     | D       | -----  | F   | F   | A | L | G | R     | L | D | V | L | G | G | S | I | V | I | R     | I | F     | S | L     | D    | A   | H | K | V | F | A | T | V     | I     | P     | ----- | S       | -----  | GP-- | GWS   | I | G | N     | N     | K     | V     | N  | V     | D | A | C | L | E | S     | L | L | E | Y | S | S |   |   |   |   |   |   |   |   |   |   |   |   |   |   |   |   |   |   |   |   |   |   |   |   |   |   |   |   |   |   |   |   |   |   |   |   |   |   |   |   |   |   |   |   |   |
| MidDCL2b | LAK | Q    | A     | A        | R    | S     | L         | S     | R   | Y       | E     | N     | D       | -----  | F   | F   | A | W | G | H     | L | D | V | L | G | G | S | I | V | K | R     | I | S     | S | D     | A    | H   | K | V | F | A | T | V | I     | P     | ----- | S     | -----   | GP--   | GWS  | I     | G | N | N     | K     | V     | N     | V  | D     | T | C | L | E | S | L     | L | E | Y | S | S |   |   |   |   |   |   |   |   |   |   |   |   |   |   |   |   |   |   |   |   |   |   |   |   |   |   |   |   |   |   |   |   |   |   |   |   |   |   |   |   |   |   |   |   |   |   |
| SIDCL1   | CAY | K    | V     | A        | H    | S     | F         | L     | T   | A       | L     | Q     | N       | -----  | D   | E   | R | A | S | ----- | Y | Q | L | D | V | K | F | Q | E | S | Y     | L | D     | K | V     | S    | I   | L | Q | C | E | I | S | E     | G     | A     | V     | A       | Q      | S    | N     | L | N | A     | -     | E     | T     | H  | K     | G | D | N | P | S | D     | R | P | D | E | M | E | E | G | E | L | L | E | S | H | V | V | S | V | G | E | H | V | D | V | I | L | G | A | A | V | A | D | C | K | V | I | P | E | V | Q | S | L | I | K | I | L | L | K | Y | Q | H |
| MidDCL1  | CAY | K    | V     | A        | Q    | S     | F         | L     | T   | A       | L     | Q     | N       | -----  | D   | E   | R | A | N | ----- | Y | Q | L | D | V | K | F | Q | E | S | Y     | L | S     | K | V     | S    | I   | L | Q | C | E | I | L | E     | G     | A     | V     | S       | D      | K    | A     | A | N | S     | D     | N     | G     | I  | V     | Q | D | S | T | Y | V     | D | E | I | E | E | G | E | L | P | D | S | H | V | V | S | G | G | E | H | V | D | V | I | L | G | A | A | V | A | D | C | K | V | I | P | E | V | Q | S | L | I | K | I | L | L | R | Y | Q | H |   |   |
| AtDCL1   | CAY | K    | V     | G        | Q    | S     | F         | L     | S   | A       | L     | Q     | S       | -----  | D   | E   | R | V | N | ----- | F | Q | V | D | V | K | F | Q | E | S | Y     | L | S     | E | V     | V    | S   | I | L | Q | C | E | I | L     | E     | G     | A     | A       | A      | E    | K     | V | A | A     | E     | ----- | V     | G  | K     | P | E | N | G | N | A     | H | D | E | M | E | E | G | E | L | P | D | D | P | V | S | G | G | E | H | V | D | E | V | I | L | G | A | A | V | A | D | C | K | V | I | P | E | V | Q | S | L | I | K | I | L | L | K | Y | Q | H |   |
| AtDCL3   | CAH | L    | A     | A        | E    | V     | C         | L     | E   | K       | I     | S     | D       | -----  | T   | K   | E | S | E | T     | Y | K | E | C | S | M | V | C | K | E | I     | L | E     | D | I     | L    | S   | T | I | G | V | Y | I | P     | ----- | QD    | ----- | QD      | -----  | DK   | S     | L | V | ----- | D     | I     | Q     | Q  | N     | H | L | S | A | M | I     | S | C | H | V | S | P | K | E | I | F | H | L | I | D | S | F | R | G |   |   |   |   |   |   |   |   |   |   |   |   |   |   |   |   |   |   |   |   |   |   |   |   |   |   |   |   |   |   |   |   |   |
| MidDCL3  | CAY | E    | A     | V        | K    | V     | C         | L     | E   | N       | V     | P     | K       | -----  | V   | Q   | D | E | C | E     | I | Y | R | E | S | S | L | Q | C | K | Y     | I | L     | E | E     | I    | L   | C | I | I | G | G | S | I     | P     | L     | V     | L       | F      | P    | ----- | S | H | P     | T     | G     | ----- | QD | ----- | E | K | N | F | L | ----- | D | F | G | F | D | Y | T | K | A | V | D | L | C | Y | I | S | P | E | H | E | I | Q | L | F | L | S | E | G | G |   |   |   |   |   |   |   |   |   |   |   |   |   |   |   |   |   |   |   |   |   |   |
| SIDCL3   | CAY | E    | A     | V        | K    | I     | C         | L     | E   | N       | V     | P     | N       | -----  | D   | K   | D | E | N | I     | L | R | T | S | S | L | Q | H | R | Y | I     | L | E     | E | A     | L    | S   | I | V | Q | E | S | M | P     | ----- | QD    | ----- | QD      | -----  | C    | E     | S | L | F     | ----- | D     | V     | G  | Y     | D | L | S | A | T | L     | S | M | C | H | I | S | P | E | H | E | I | Q | L | F | L | S | E | G | G |   |   |   |   |   |   |   |   |   |   |   |   |   |   |   |   |   |   |   |   |   |   |   |   |   |   |   |   |   |   |   |   |

SF2\_C\_dicer

|          |     |     |     |     |     |     |     |     |     |     |     |     |     |   |   |   |   |   |   |   |   |   |   |   |   |   |   |   |   |   |   |   |   |   |   |   |   |   |   |   |   |   |   |       |   |   |   |   |   |   |   |   |   |   |   |   |   |   |   |   |   |   |   |   |   |   |   |   |   |   |   |   |   |   |   |   |   |   |   |   |   |   |   |   |   |   |   |   |   |   |   |   |   |   |   |   |   |   |   |   |   |   |   |   |   |   |   |   |       |       |   |   |       |       |       |       |       |
|----------|-----|-----|-----|-----|-----|-----|-----|-----|-----|-----|-----|-----|-----|---|---|---|---|---|---|---|---|---|---|---|---|---|---|---|---|---|---|---|---|---|---|---|---|---|---|---|---|---|---|-------|---|---|---|---|---|---|---|---|---|---|---|---|---|---|---|---|---|---|---|---|---|---|---|---|---|---|---|---|---|---|---|---|---|---|---|---|---|---|---|---|---|---|---|---|---|---|---|---|---|---|---|---|---|---|---|---|---|---|---|---|---|---|---|---|-------|-------|---|---|-------|-------|-------|-------|-------|
|          | 790 | 800 | 810 | 820 | 830 | 840 | 850 | 860 | 870 | 880 | 890 | 900 | 910 |   |   |   |   |   |   |   |   |   |   |   |   |   |   |   |   |   |   |   |   |   |   |   |   |   |   |   |   |   |   |       |   |   |   |   |   |   |   |   |   |   |   |   |   |   |   |   |   |   |   |   |   |   |   |   |   |   |   |   |   |   |   |   |   |   |   |   |   |   |   |   |   |   |   |   |   |   |   |   |   |   |   |   |   |   |   |   |   |   |   |   |   |   |   |   |       |       |   |   |       |       |       |       |       |
| AtDCL4   | E   | P   | H   | M   | K   | C   | I   | F   | V   | N   | R   | I   | V   | T | A | R | T | I | L | S | C | I | L | N | N | I | - | E | L | L | R | S | W | K | S | D | F | L | V | G | L | S | S | G     | L | K | S | M | S | R | I | S | M | E | T | I | L | K | R | F | Q | S | K | E | L | N | L | L | V | A | T | K | V | G | E | E | G | L | D | I | Q | T | C | C | L | V | I | R | Y | D | L | P | E | T | V | S | F | I | Q | S | R | G | R | A | R | M | P | Q | S     | E     | I | A | F     | L     | V     | ----- | ----- |
| MidDCL4  | Q   | P   | N   | M   | K   | C   | I   | F   | V   | N   | R   | I   | V   | T | A | R | T | I | L | S | C | I | L | N | N | I | - | K | F | L | A | Y | W | K | C | H | F | L | V | G | H | A | G | L     | K | S | M | S | R | I | A | M | K | S | I | L | E | K | F | R | C | G | E | L | N | L | L | V | A | T | K | V | G | E | E | G | L | D | I | Q | T | C | C | L | V | I | R | F | D | L | P | E | T | V | S | F | I | Q | S | R | G | R | A | R | M | P | Q | S | E     | I     | A | F | L     | V     | ----- | ----- |       |
| SIDCL4   | Q   | P   | D   | M   | K   | C   | I   | F   | V   | N   | R   | I   | V   | T | A | R | S | I | S | Y | I | L | Q | H | I | - | K | I | L | S | W | K | C | G | F | L | V | G | H | S | G | L | K | S     | M | S | R | I | N | T | N | I | I | L | D | K | F | R | S | C | E | L | N | L | I | A | T | K | V | G | E | E | G | L | D | I | Q | T | C | C | L | V | I | R | F | D | L | P | E | T | V | A | S | F | I | Q | S | R | G | R | A | R | M | P | K | S | E | I | A     | F     | L | V | ----- | ----- |       |       |       |
| SIDCL2d  | R   | K   | D   | L   | R   | C   | I   | F   | V   | E   | R   | I   | T   | A | I | V | L | R | S | I | L | N | E | I | - | F | L | E | R | S | G | W | R | T | E | T | T | G | R | I | T | T | F | ----- | K | Q | N | K | I | V | E | E | F | R | K | G | L | V | N | I | V | A | T | S | I | L | E | E | G | L | D | V | R | S | C | N | L | V | I | R | F | D | P | S | T | I | V | C | S | F | I | Q | S | R | G | R | A | R | M | Q | N | S | D | F | I | L | M | V | ----- | ----- |   |   |       |       |       |       |       |
| SIDCL2c  | L   | K   | D   | L   | R   | C   | I   | F   | V   | E   | R   | I   | T   | A | I | V | L | R | S | I | L | N | E | I | - | L | P | K | L | S | G | W | R | T | E | C | T | A | G | H | A | S | V | V     | Q | S | S | R | I | Q | N | K | I | V | E | E | F | R | K | G | L | V | N | I | V | A | T | S | I | L | E | E | G | L | D | V | Q | S | C | N | L | V | I | R | F | D | P | S | A | T | I | V | C | S | F | I | Q | S | R | G | R | A | R | M | Q | N | S | D | F     | I     | L | M | V     | ----- | ----- |       |       |
| SIDCL2a  | Q   | K   | D   | L   | R   | C   | I   | F   | V   | E   | R   | I   | T   | A | I | V | L | R | S | I | L | N | E | I | - | L | P | E | L | C | G | W | R | T | E | T | A | G | H | I | S | V | V | Q     | S | S | R | I | Q | N | K | I | V | E | E | F | R | K | G | L | V | N | I | V | A | T | S | I | L | E | E | G | L | D | V | Q | S | C | N | L | V | I | R | F | D | P | S | A | T | I | V | C | S | F | I | Q | S | R | G | R | A | R | M | Q | N | S | D | F | I     | L     | M | V | ----- | ----- |       |       |       |
| SIDCL2b  | Q   | K   | D   | L   | R   | C   | I   | F   | V   | E   | R   | I   | T   | A | I | V | L | R | S | I | L | N | E | I | - | L | P | E | R | S | G | W | R | T | E | T | A | G | H | V | S | V | L | Q     | S | S | R | I | Q | N | K | I | V | E | E | F | R | K | G | L | V | N | I | V | A | T | S | I | L | E | E | G | L | D | V | Q | S | C | N | L | V | I | R | F | D | P | S | A | T | I | V | C | S | F | I | Q | S | R | G | R | A | R | M | Q | N | S | D | F | I     | L     | M | V | ----- | ----- |       |       |       |
| AtDCL2   | L   | E   | N   | I   | R   | C   | I   | F   | V   | D   | R   | V   | I   | T | A | I | V | L | E | S | I | L | A | E | I | - | L | P | N | C | N | W | K | T | K | Y | A | G | N | N | S | G | L | Q     | N | Q | T | R | I | K | Q | N | E | I | V | E | D | F | R | R | G | L | V | N | I | V | A | T | S | I | L | E | E | G | L | D | V | Q | S | C | N | L | V | I | R | F | D | P | S | A | N | I | C | S | F | I | Q | S | R | G | R | A | R | M | Q | N | S | D | F     | I     | L | M | V     | ----- | ----- |       |       |
| MidDCL2a | L   | Q   | D   | I   | R   | C   | I   | F   | V   | Q   | R   | V   | I   | T | A | I | V | L | E | A | L | N | E | I | - | L | P | G | Y | C | S | W | K | T | K | Y | A | G | N | N | S | G | L | Q     | C | S | K | K | Q | N | E | I | V | E | E | F | R | C | G | L | V | N | I | V | A | T | S | I | L | E | E | G | L | D | V | Q | S | C | N |   |   |   |   |   |   |   |   |   |   |   |   |   |   |   |   |   |   |   |   |   |   |   |   |   |   |   |   |   |       |       |   |   |       |       |       |       |       |



|          |                         |                                                     |                                                     |                                                                                              |                                                                       |       |                                           |       |       |       |       |       |       |
|----------|-------------------------|-----------------------------------------------------|-----------------------------------------------------|----------------------------------------------------------------------------------------------|-----------------------------------------------------------------------|-------|-------------------------------------------|-------|-------|-------|-------|-------|-------|
|          | 1,050                   | 1,060                                               | 1,070                                               | 1,080                                                                                        | 1,090                                                                 | 1,100 | 1,110                                     | 1,120 | 1,130 | 1,140 | 1,150 | 1,160 | 1,170 |
| AtDCL4   | S S L L P S T E A A K K | D A C L K A V H E L H N I G V L N D F L L P         | D S K D E I E D E L S D D E F D N I K G E G C S R G | D L Y E M R V P V L F K Q K W D P S T S C V N                                                | --L H S Y Y I M F V P                                                 | ----- | HP A D R I Y K K F G F F M K S P I P      |       |       |       |       |       |       |
| MidDCL4  | G K P Q S S I E A A K K | D A C L K A I E E L H K I G A L N D Y L L P         | D E G N E I E E D G E L D S S D S D S C E G Q       | -I L R C E R H E M L V P A L I K E S W S M S E N H V C                                       | --L N S Y Y I Q F F P                                                 | ----- | DP K D R I Y K D F G I F V K S P I P      |       |       |       |       |       |       |
| SIDCL4   | S A P Q S S I E A A K K | D A C L R A C K S I H E L G A L T D Y L L P         | D Q A D E D - K D L V P D F S D L E C C E G E       | -D A R E E L H E M I V P A S I K E P W T E T D N P V C                                       | --L N S Y Y I S F F P                                                 | ----- | FP N D R V Y K K F G I F L K A P I P      |       |       |       |       |       |       |
| SIDCL2d  | S V Q G K R - K I L K Q | L A C L E A C K Q L H R V G A L T D N L V P         | D I V E E E T I N K E L E                           | ---C K I ---K I V H Q - S L Y Y P S E F V S H C G                                            | ---N E S ---E A V Y Y C Y L V E L P H                                 | ----- | DS Y N D S Q L H G I I I I A V R T K I K  |       |       |       |       |       |       |
| SIDCL2c  | T V Q G N S T K I L R Q | L A C L E A C K E L H R V G A L T D N L V P         | D I V E E E A I N K E L E                           | ---C Q I ---H T V E - S K Y F I P P E F V S H I G                                            | ---N E T ---E A V Y Y C Y L V E L Q H                                 | ----- | ET Y D D F Q L H G I I I I A V R T K I K  |       |       |       |       |       |       |
| SIDCL2a  | S V Q G N S - K I S K Q | L A C L E A C K E L H R V G A L T D N L V P         | D I M E E E T I N K E L E                           | ---C Q I ---H T V E - L K Y F I P P E V S H C G                                              | ---N D S ---E A V Y Y C Y L V E L Q H                                 | ----- | D A C N D F Q L H G I I I I A V R T K I K |       |       |       |       |       |       |
| SIDCL2b  | S V Q G K R - K I L K Q | L A C L E A C K Q L H R V G A L T D N L V P         | D I V E E E I I N K E L E                           | ---C Q I ---Q T V E - S K Y F I P P E V S H C S                                              | ---N D S ---E A V Y Y C Y L V E M Q H                                 | ----- | AS Y N D F E L H G I I I I A V R T K I K  |       |       |       |       |       |       |
| AtDCL2   | K A E A N N - K V L K Q | A V C L K A C I Q L H K V G A L S D H L V P         | D M V V A E T V S Q K L E                           | ---K I Q ---Y N T H Q - P C Y F I P P E V S Q F S                                            | ---A Q P ---E T T Y H F Y L I R M K P                                 | ----- | N S P R N F L H N D V L L G T R V L E I   |       |       |       |       |       |       |
| MidDCL2a | Q V R G H V - K T L K Q | T A C L E A C Q L H Q N G A L T D N L V P           | D I V E E E T D A Q K S A                           | ---N D P ---S N D H Q - P I Y F I P P E V N E Q A                                            | ---H I T ---K T M Y Q C Y L I E L K Q                                 | ----- | N F N Y D V P L H D I I I I A M R T E L E |       |       |       |       |       |       |
| MidDCL2b | Q V Q G N V - K A L K Q | I A C L E A C K Q L H Q T G A L T G N L V P         | D I V V E E A E A Q K S E                           | ---N D P ---Y N D H Q - P I Y F I P P E V N E H A                                            | ---H I A ---K T M Y Q C Y L I E L K Q                                 | ----- | N F N Y D V P L H D I I I I A M R T E L E |       |       |       |       |       |       |
| SIDCL1   | G P V C S S M R L A Q Q | A A C L D A C K K L H Q M G A F T D M L L P         | D K G S G V S E K V E Q D E E G D P I P G T         | -S R H R E F Y P E G V A D I I R G D W I L S G K D P L V S S K F I                           | H L Y M Y A I K C V N I G P S K D P F L T D V S E F A I L F G N E I D |       |                                           |       |       |       |       |       |       |
| MidDCL1  | G P V C S S M R L A Q Q | A C Y N A V C L A A C K K L H E M G A F T D M L L P | D K G S G E Q Q E K V D Q N D E G D L P G T         | -A R H R E F Y P E G V A D I I Q G E W I L S G R D G C S D S K M H L Y M Y A V K C V N S G I | S K D P F L T Q V S E F A V V F S N E I D                             |       |                                           |       |       |       |       |       |       |
| AtDCL1   | G P V C S S M R L A Q Q | A V C L A A C K K L H E M G A F T D M L L P         | D K G S G Q D A E K A D Q D D E G E P V P G T       | -A R H R E F Y P E G V A D V I K G E W V S S G K E V C S E K L H L Y M Y N V R C V D F G S   | S K D P F L S E V S E F A I L F G N E I D                             |       |                                           |       |       |       |       |       |       |
| AtDCL3   | D P P S R N E Q L       | ---P P C K K R L                                    | ---D N N L Q S N G K E K V A S S K                  | ---S K S S S A A G S - K R R K L H G T T C A N A I S G T W G E N                             | ---I D G A T T Q A Y K F D F C C N I S G E                            | ----- | V Y S S F S I L L E S T L A               |       |       |       |       |       |       |
| MidDCL3  | G P P S R N K N L S K Q | L V C L E A C K K L H Q M G A L N D H L L P         | D I E E P F S N L                                   | ---I V K N K P A G A T - T K R K L H G T N P I R A I S G S W G E K                           | ---V D G V L H A Y K F D F S C N I A S E                              | ----- | I Y S G F M F L T E S K I D               |       |       |       |       |       |       |
| SIDCL3   | G P E C R S S Q L S R Q | L V C L D A C K K L H Q T G A L N D H L L P         | D F N E K P P R G G S D                             | ---V Q D R K L G A G T - T K L K L H G T A C I S A I S G S W G N D                           | ---P N G E V Y Q V Y K M N F L C N I K E V                            | ----- | K Y S S F I L L L Q S E I D               |       |       |       |       |       |       |

Dicer\_dimer

|          |                                                                                                                                                           |                                                                                                           |                                                                                                           |                                                                                                           |                                                                                                           |                                                                                                           |                                                                                                           |                                                                                                           |                                                                                                           |                                                                                                           |                                                                                                           |                                                                                                           |                                                                                                           |
|----------|-----------------------------------------------------------------------------------------------------------------------------------------------------------|-----------------------------------------------------------------------------------------------------------|-----------------------------------------------------------------------------------------------------------|-----------------------------------------------------------------------------------------------------------|-----------------------------------------------------------------------------------------------------------|-----------------------------------------------------------------------------------------------------------|-----------------------------------------------------------------------------------------------------------|-----------------------------------------------------------------------------------------------------------|-----------------------------------------------------------------------------------------------------------|-----------------------------------------------------------------------------------------------------------|-----------------------------------------------------------------------------------------------------------|-----------------------------------------------------------------------------------------------------------|-----------------------------------------------------------------------------------------------------------|
|          | 1,310                                                                                                                                                     | 1,320                                                                                                     | 1,330                                                                                                     | 1,340                                                                                                     | 1,350                                                                                                     | 1,360                                                                                                     | 1,370                                                                                                     | 1,380                                                                                                     | 1,390                                                                                                     | 1,400                                                                                                     | 1,410                                                                                                     | 1,420                                                                                                     | 1,430                                                                                                     |
| AtDCL4   | ---P                                                                                                                                                      | ---                                                                                                       | ---                                                                                                       | ---                                                                                                       | S V L                                                                                                     | ---                                                                                                       | V E D I F P P S G S H                                                                                     | L K L A N G C W N I                                                                                       | D D V K N S L V F T T Y S K Q F Y F V A D I C H G R N G F S P V                                           | --K E                                                                                                     | ---                                                                                                       | S S T K S H V E S I Y K                                                                                   |                                                                                                           |
| MidDCL4  | ---P                                                                                                                                                      | ---                                                                                                       | ---                                                                                                       | ---                                                                                                       | P S S                                                                                                     | ---                                                                                                       | M S T K K F P S D E Y L Q L D N G C W S I                                                                 | ---                                                                                                       | S D V E N S L I F V R I K E S F Y F V S N I V R E K N G Y S L Y                                           | --K N                                                                                                     | ---                                                                                                       | S G T R N V E L V E                                                                                       |                                                                                                           |
| SIDCL4   | ---S                                                                                                                                                      | ---                                                                                                       | ---                                                                                                       | ---                                                                                                       | V C T                                                                                                     | ---                                                                                                       | S - N N M S K F E E Q I Q L A N G S K S V                                                                 | ---                                                                                                       | H D M V N S L V Y V P C K D A F F I S D V V K D K N A Y S M Y                                             | --K D                                                                                                     | ---                                                                                                       | S - K N V E H Y Y D                                                                                       |                                                                                                           |
| SIDCL2d  | K H M D                                                                                                                                                   | ---                                                                                                       | ---                                                                                                       | ---                                                                                                       | W C S                                                                                                     | ---                                                                                                       | T Q                                                                                                       | ---                                                                                                       | G R R C S V N T I S E V V C S                                                                             | ---                                                                                                       | ---                                                                                                       | E E S I T Y R E H Y R K                                                                                   |                                                                                                           |
| SIDCL2c  | K H M D                                                                                                                                                   | ---                                                                                                       | ---                                                                                                       | ---                                                                                                       | W C S                                                                                                     | ---                                                                                                       | T Q                                                                                                       | ---                                                                                                       | D R K R S V N T K T G V V C S                                                                             | ---                                                                                                       | ---                                                                                                       | G E S I T Y R E H Y R K                                                                                   |                                                                                                           |
| SIDCL2a  | K H M D                                                                                                                                                   | ---                                                                                                       | ---                                                                                                       | ---                                                                                                       | W C S                                                                                                     | ---                                                                                                       | T Q                                                                                                       | ---                                                                                                       | G R K R S V S T K T G V I C S                                                                             | ---                                                                                                       | ---                                                                                                       | G E P I T Y I E Y Y K K                                                                                   |                                                                                                           |
| SIDCL2b  | K H M D                                                                                                                                                   | ---                                                                                                       | ---                                                                                                       | ---                                                                                                       | W C S                                                                                                     | ---                                                                                                       | T Q                                                                                                       | ---                                                                                                       | D R K R S V N T K N G L V C S                                                                             | ---                                                                                                       | ---                                                                                                       | G E S I T Y I E Y Y K K                                                                                   |                                                                                                           |
| AtDCL2   | K H E                                                                                                                                                     | ---                                                                                                       | ---                                                                                                       | ---                                                                                                       | N C S                                                                                                     | ---                                                                                                       | T N                                                                                                       | ---                                                                                                       | G A S R I I H T K D G L F C T                                                                             | ---                                                                                                       | ---                                                                                                       | S G D Q I Y I E Y Y E E                                                                                   |                                                                                                           |
| MidDCL2a | D H T                                                                                                                                                     | ---                                                                                                       | ---                                                                                                       | ---                                                                                                       | N C P                                                                                                     | ---                                                                                                       | S E                                                                                                       | ---                                                                                                       | G N A H F V E T K S G R F C I                                                                             | ---                                                                                                       | ---                                                                                                       | G A V I T Y R E Y Y K K                                                                                   |                                                                                                           |
| MidDCL2b | D H T                                                                                                                                                     | ---                                                                                                       | ---                                                                                                       | ---                                                                                                       | N C P                                                                                                     | ---                                                                                                       | S E                                                                                                       | ---                                                                                                       | G N A H F V E T K S G R F C T                                                                             | ---                                                                                                       | ---                                                                                                       | G A V I T Y R E Y Y K K                                                                                   |                                                                                                           |
| SIDCL1   | N E R S L G G D R R E Y G F A K L R H G M A I G L K S H P T Y G V R G A I A H Y D L V Q A S G L V P N R S S L D                                           | D V E V D L N K D K I M M A D C S L R A                                                                   | E D I V G R I V T A A I S C K R F Y V D C I R S D M T A E N S F P R K E G Y L G P L E Y S S Y A A Y Y K K | E D I V G R I V T A A I S C K R F Y V D C I R S D M T A E N S F P R K E G Y L G P L E Y S S Y A A Y Y K K | E D I V G R I V T A A I S C K R F Y V D C I R S D M T A E N S F P R K E G Y L G P L E Y S S Y A A Y Y K K | E D I V G R I V T A A I S C K R F Y V D C I R S D M T A E N S F P R K E G Y L G P L E Y S S Y A A Y Y K K | E D I V G R I V T A A I S C K R F Y V D C I R S D M T A E N S F P R K E G Y L G P L E Y S S Y A A Y Y K K | E D I V G R I V T A A I S C K R F Y V D C I R S D M T A E N S F P R K E G Y L G P L E Y S S Y A A Y Y K K | E D I V G R I V T A A I S C K R F Y V D C I R S D M T A E N S F P R K E G Y L G P L E Y S S Y A A Y Y K K | E D I V G R I V T A A I S C K R F Y V D C I R S D M T A E N S F P R K E G Y L G P L E Y S S Y A A Y Y K K | E D I V G R I V T A A I S C K R F Y V D C I R S D M T A E N S F P R K E G Y L G P L E Y S S Y A A Y Y K K | E D I V G R I V T A A I S C K R F Y V D C I R S D M T A E N S F P R K E G Y L G P L E Y S S Y A A Y Y K K | E D I V G R I V T A A I S C K R F Y V D C I R S D M T A E N S F P R K E G Y L G P L E Y S S Y A A Y Y K K |
| MidDCL1  | N E R T L G G D R R E Y G F G K L R H G M A F G Q A C H P T Y G I R G A V A K Y D V V Q A S G L V P Y R D T M Q L Q - N V D I G K G K I I M A H S F T D A | E D I V G R I V T A A I S C K R F Y V D C I R S D M T A E N S F P R K E G Y L G P L E Y S S Y A A Y Y K K | E D I V G R I V T A A I S C K R F Y V D C I R S D M T A E N S F P R K E G Y L G P L E Y S S Y A A Y Y K K | E D I V G R I V T A A I S C K R F Y V D C I R S D M T A E N S F P R K E G Y L G P L E Y S S Y A A Y Y K K | E D I V G R I V T A A I S C K R F Y V D C I R S D M T A E N S F P R K E G Y L G P L E Y S S Y A A Y Y K K | E D I V G R I V T A A I S C K R F Y V D C I R S D M T A E N S F P R K E G Y L G P L E Y S S Y A A Y Y K K | E D I V G R I V T A A I S C K R F Y V D C I R S D M T A E N S F P R K E G Y L G P L E Y S S Y A A Y Y K K | E D I V G R I V T A A I S C K R F Y V D C I R S D M T A E N S F P R K E G Y L G P L E Y S S Y A A Y Y K K | E D I V G R I V T A A I S C K R F Y V D C I R S D M T A E N S F P R K E G Y L G P L E Y S S Y A A Y Y K K | E D I V G R I V T A A I S C K R F Y V D C I R S D M T A E N S F P R K E G Y L G P L E Y S S Y A A Y Y K K | E D I V G R I V T A A I S C K R F Y V D C I R S D M T A E N S F P R K E G Y L G P L E Y S S Y A A Y Y K K | E D I V G R I V T A A I S C K R F Y V D C I R S D M T A E N S F P R K E G Y L G P L E Y S S Y A A Y Y K K | E D I V G R I V T A A I S C K R F Y V D C I R S D M T A E N S F P R K E G Y L G P L E Y S S Y A A Y Y K K |
| AtDCL1   | N E R T L G G D R R E Y G F G K L R H N I V F G Q K S H P T Y G I R G A V A S F D V V R A S G L L P V R D A F E K E V E E D L S K G K I M M A D G C M V A | E D I V G R I V T A A I S C K R F Y V D C I R S D M T A E N S F P R K E G Y L G P L E Y S S Y A A Y Y K K | E D I V G R I V T A A I S C K R F Y V D C I R S D M T A E N S F P R K E G Y L G P L E Y S S Y A A Y Y K K | E D I V G R I V T A A I S C K R F Y V D C I R S D M T A E N S F P R K E G Y L G P L E Y S S Y A A Y Y K K | E D I V G R I V T A A I S C K R F Y V D C I R S D M T A E N S F P R K E G Y L G P L E Y S S Y A A Y Y K K | E D I V G R I V T A A I S C K R F Y V D C I R S D M T A E N S F P R K E G Y L G P L E Y S S Y A A Y Y K K | E D I V G R I V T A A I S C K R F Y V D C I R S D M T A E N S F P R K E G Y L G P L E Y S S Y A A Y Y K K | E D I V G R I V T A A I S C K R F Y V D C I R S D M T A E N S F P R K E G Y L G P L E Y S S Y A A Y Y K K | E D I V G R I V T A A I S C K R F Y V D C I R S D M T A E N S F P R K E G Y L G P L E Y S S Y A A Y Y K K | E D I V G R I V T A A I S C K R F Y V D C I R S D M T A E N S F P R K E G Y L G P L E Y S S Y A A Y Y K K | E D I V G R I V T A A I S C K R F Y V D C I R S D M T A E N S F P R K E G Y L G P L E Y S S Y A A Y Y K K | E D I V G R I V T A A I S C K R F Y V D C I R S D M T A E N S F P R K E G Y L G P L E Y S S Y A A Y Y K K | E D I V G R I V T A A I S C K R F Y V D C I R S D M T A E N S F P R K E G Y L G P L E Y S S Y A A Y Y K K |
| AtDCL3   | R D S D                                                                                                                                                   | ---                                                                                                       | G                                                                                                         | ---                                                                                                       | N Q C                                                                                                     | ---                                                                                                       | N T S S G Q E V L L D D K                                                                                 | ---                                                                                                       | M E E T N L I H F A N A S S D K                                                                           | ---                                                                                                       | ---                                                                                                       | S G Y A T Y A E Y F N K                                                                                   |                                                                                                           |
| MidDCL3  | N H S N                                                                                                                                                   | ---                                                                                                       | G                                                                                                         | ---                                                                                                       | Y E G                                                                                                     | ---                                                                                                       | N L S P H R T D S S Q K E                                                                                 | ---                                                                                                       | C N I E D I I H F A N C S V D A                                                                           | ---                                                                                                       | ---                                                                                                       | K D I K N R V V L A I I T E R I Y S T V E V V C N T S A E S P F D G T A - D G A P S V Y T I F T D Y F R K |                                                                                                           |
| SIDCL3   | E K S E                                                                                                                                                   | ---                                                                                                       | A                                                                                                         | ---                                                                                                       | K R K                                                                                                     | ---                                                                                                       | N S L V D R T A S F V E D                                                                                 | ---                                                                                                       | I D Q T D L I H F A N M S I S F                                                                           | ---                                                                                                       | ---                                                                                                       | S K I M D M V V V A I I T E R I Y S V L E A V A N S S A E S P F E V D S - E A T V A P F S S F A D Y F R K |                                                                                                           |

PAZ

|          |       |                                                 |                                                                         |       |                                           |       |                                                                   |       |       |       |       |       |       |
|----------|-------|-------------------------------------------------|-------------------------------------------------------------------------|-------|-------------------------------------------|-------|-------------------------------------------------------------------|-------|-------|-------|-------|-------|-------|
|          | 1,440 | 1,450                                           | 1,460                                                                   | 1,470 | 1,480                                     | 1,490 | 1,500                                                             | 1,510 | 1,520 | 1,530 | 1,540 | 1,550 | 1,560 |
| AtDCL4   | L     | ---                                             | ---                                                                     | ---   | ---                                       | ---   | ---                                                               | ---   | ---   | ---   | ---   | ---   | ---   |
| MidDCL4  | R     | ---                                             | ---                                                                     | ---   | ---                                       | ---   | ---                                                               | ---   | ---   | ---   | ---   | ---   | ---   |
| SIDCL4   | T     | ---                                             | ---                                                                     | ---   | ---                                       | ---   | ---                                                               | ---   | ---   | ---   | ---   | ---   | ---   |
| SIDCL2d  | R     | ---                                             | ---                                                                     | ---   | ---                                       | ---   | ---                                                               | ---   | ---   | ---   | ---   | ---   | ---   |
| SIDCL2c  | R     | ---                                             | ---                                                                     | ---   | ---                                       | ---   | ---                                                               | ---   | ---   | ---   | ---   | ---   | ---   |
| SIDCL2a  | R     | ---                                             | ---                                                                     | ---   | ---                                       | ---   | ---                                                               | ---   | ---   | ---   | ---   | ---   | ---   |
| SIDCL2b  | R     | ---                                             | ---                                                                     | ---   | ---                                       | ---   | ---                                                               | ---   | ---   | ---   | ---   | ---   | ---   |
| AtDCL2   | R     | ---                                             | ---                                                                     | ---   | ---                                       | ---   | ---                                                               | ---   | ---   | ---   | ---   | ---   | ---   |
| MidDCL2a | K     | ---                                             | ---                                                                     | ---   | ---                                       | ---   | ---                                                               | ---   | ---   | ---   | ---   | ---   | ---   |
| MidDCL2b | K     | ---                                             | ---                                                                     | ---   | ---                                       | ---   | ---                                                               | ---   | ---   | ---   | ---   | ---   | ---   |
| SIDCL1   | N     | Q M L N C L Q G L G G S A P W L Y L N N K R L M | Y G V D L V Y K K Q P L I R G R G V S Y C K N L S P R F E H S E E H E G | ---   | E L E E A T D K T Y Y V F L P P E L C V H | ---   | P I P G S L V R G A Q R L P S I M R R I E S M L A V Q L K E M I G | ---   | ---   | ---   | ---   | ---   |       |
| MidDCL1  | K     | ---                                             | ---                                                                     | ---   | ---                                       | ---   | ---                                                               | ---   | ---   | ---   | ---   | ---   | ---   |
| AtDCL1   | K     | ---                                             | ---                                                                     | ---   | ---                                       | ---   | ---                                                               | ---   | ---   | ---   | ---   | ---   | ---   |
| AtDCL3   | K     | ---                                             | ---                                                                     | ---   | ---                                       | ---   | ---                                                               | ---   | ---   | ---   | ---   | ---   | ---   |
| MidDCL3  | K     | ---                                             | ---                                                                     | ---   | ---                                       | ---   | ---                                                               | ---   | ---   | ---   | ---   | ---   | ---   |
| SIDCL3   | K     | ---                                             | ---                                                                     | ---   | ---                                       | ---   | ---                                                               | ---   | ---   | ---   | ---   | ---   | ---   |

PAZ

PAZ



1,570 1,580 1,590 1,600 1,610 1,620 1,630 1,640 1,650 1,660 1,670 1,680 1,690

AtDCL4 PEIAEVSCHRVLEALITEKCHERLSLERLHVLGDFAFLKHAVSRHLFLHDSLDLGEELTWRRSNVYNNSNLCRLAIKKNLQVYIRDQALDPTCHFAFGHPCRVTCDVEASK-----EVHSLN  
MiDCL4 SAGAEISADRVLEALITEKCHERLSLERLHVLGDFAFLKHAVGRHLFLHDSLDLGEELTRRRSNVYNNSNLHKLATKSNLQVYIRDQALDPTCHFAFGHPCRVTCTEEAER-----KIHSRK  
SiDCL4 PEGRELAIDHVLFAITENCHESLERLHVLGDFAFLKHAVGRHLFLHDSLDLGEELTRRRSNVYNNSNLYMVAIKKNLQVYIRDQALDPTCHFAFGHPCRVTCTCNQKTEK-----NIHGLC  
SiDCL2d TQNVVPIPTAKILEAMITKNCLEKHLHSLHSLTLGDSFLKYAASIKLHKTYENDHOGLLTVKVKQTILSNATLCRLGCARKMPGFTIRNKPIFLKAWIIPGDNSSQVHN-----FD  
SiDCL2c KLVNFIPTAMVLEAVITRKKLEKHLHSLHSLTLGDSFLKYAVSTQLEKTYENHHEGLLCVKKSKILSNAAALCKLGCARKIPGFTIRNEAFTLQAWIIPGDNSSQVHS-----FN  
SiDCL2a TLDIFIPITIKVLEAVITTKKCLEKHLHSLHSLTLGDSFLKYAASIQLEKTYENHHEGLLTKKNTILSNDAALCKLGCARKIPGFTIRNEAFTLQAWIIPGDNSSQVHS-----FD  
SiDCL2b TLVNFIPTATILEAMITKNCLEKHLHSLHSLTLGDSFLKYAASIKLHKTYENHHEGLLTVKVKQTILSNAAALCKLGCARKIPGFTIRNEAFTLQAWIIPGDNSSQVHS-----FD  
AtDCL2 ----IPIIKVLEAVITTKKCEDEKHLHSLHSLTLGDSFLKYAVCQQLFQHCHTHHEGLLSTKKDGMISNVMICQFGCQKIKQGTIRDECEPKGWMVPCQSSAAYS-----LV  
MiDCL2a ----MQ-----NVTIPTMKGFTIRTEPIFDPKSWIIPGDNSSGSYS-----LQ  
MiDCL2b ----MQ-----NVTIPTMKGFTIRTEPIFDPKSWIIPGDNSSGSYP-----LQ  
SiDCL1 ---YPIPALKILLEALIAASCQHTTCYERAHLLGDAYIKWVVSRYLFLKYPQKHHEGQLTRMRQOMYSNMLVYQYALNGLIQSYIQADREAPSRWAAPGVLPVYDEDLNEDETSIFDHEAENGTVAAKALA  
MiDCL1 ---YPIPALSKILLEALIAASCQHTTCYERAHLLGDAYIKWVVSRYLFLKYPQKHHEGQLTRMRQOMYSNMLVYQYALNGLIQSYIQADREAPSRWAAPGVLPVYDEDLNEDETSIFDHEAENGTVAAKALA  
AtDCL1 ---YPIPTSKILLEALIAASCQHTTCYERAHLLGDAYIKWVVSRYLFLKYPQKHHEGQLTRMRQOMYSNMLVYQYALNGLIQSYIQADREAPSRWAAPGVLPVYDEDLNEDETSIFDHEAENGTVAAKALA  
AtDCL3 -DNFSLISTSLLEAVITLTCPESESMRLELHSLGDSVLKYAISCHEFLKYPDKDEGQLSGRRQVSLCNSTLHKFGTDRLKQGYIRDSAFDARRWAAPGQLSVFPVPCCEGVDTL-----VP----LD  
MiDCL3 -SSLHPISSSLLEALITLRCCEKESMRLELHSLGDSVLKYAISCHEFLKYPDKDEGQLSGRRQVSLCNSTLHKFGTDRLKQGYIRDSAFDARRWAAPGQLSVFPVPCCEGVDTL-----VP----LE  
SiDCL3 -GDLHPISSSLLEALITLRCNESESMRLELHSLGDSVLKYAVSCYLFLKYPKKHEGQLTNERSQLSNLHKLGTNHLKQGYIRDSAFDARRWAAPGQLSVLPVPCCEHGVETSQ-----VP----LD

RIBOc

1,700 1,710 1,720 1,730 1,740 1,750 1,760 1,770 1,780 1,790 1,800 1,810 1,820

AtDCL4 RDLGIL--ESNTGEIRCSKGHHWYKKTITADVVEALVGAFLVDSGFKCAVFLKWLIGVNVDFESLD--VQDACIASRRYLPLTTRNNLETEENQLDYKFLHKGLLVQAFIHPSSYNRH-GGGCYCRLEFLC  
MiDCL4 KFRAAD--DANSAEIRCSKGHHWHKKTITADVVEALVGAFLVDSGFKCAVFLKWLIGVNVDFESLD--VTNACLASRSYLSLTHAMDLAALNFIQGYFLHKGLLVQAFIHPSSYNRH-GGGCYCRLEFLC  
SiDCL4 --GSGT--DGIKTEVRCISKYHHWRKKTITADVVEALVGAFLVDSGFKCAVFLKWLIGVNVDFESLD--LKSICSAKSVFMPPLADEIDVLGLIRLLGYSFIHKGLLVQAFIHPSSYNRH-GGGCYCRLEFLC  
SiDCL2d EELL-----TSSVKMYSRGKQKIKSKIMADVVEALIGAYLSSGGEVAALSFMKWLGVDINFDVAP--TSRH-----LPMNAEKLNNVRYLSLHYKFNDPSSLVEALTHGSCMLPDIIPRCYCRLEFLC  
SiDCL2c EELM-----TSSDKMYSRIKQKIRSKRVADVVEALIGAYLSSGGEVAALSMKWLGMDIDFADAP--IQRH-----FPLNAEKLNNVRYLSLHYKFNDPSSLVEALTHGSCMLPDIIPRCYCRLEFLC  
SiDCL2a EEFLL-----TSSDKMYSRGKQKFRSKRVADVVEALIGAYLSSGGEVAALSFMKWLGVDINFDVAP--LPRN-----FPMNAEKLNNVRYLSLHYKFNDPSSLVEALTHGSCMLPDIIPRCYCRLEFLC  
SiDCL2b EVLL-----TSSDKMYSRGKQKIRSKRVADVVEALIGAYLSSGGEVAALSFMKWLGVDINFDVAP--MSRH-----FPMNAEKLNNVRYLSLHYKFNDPSSLVEALTHGSCMLPDIIPRCYCRLEFLC  
AtDCL2 NDTL-----PESRNIYVASRIRNKRKISVADVVEALIGAYLSSGGEVAALSMKWLGVDINFDVAP--IQRD-----SPIQAEKLNNVRYLSLHYKFNDPSSLVEALTHGSCMLPDIIPRCYCRLEFLC  
MiDCL2a EELL-----SDKRKIYVSGKRTWKGTITADAVEALIGAFIISTAGESAGILFLSRIGIDVDVFNIP--YQRH-----FOIRAEKLNNRAHLSLNNYKFNHSSSLVEALTHGSCMLPDIIPRCYCRLEFLC  
MiDCL2b EELL-----SDTRKIYVSGKRTWKGTITADAVEALIGAFIISTAGESAGILFLNRIGIDVDVFNIP--YQRH-----FOIRAEKLNNRAHLSLNNYKFNHSSSLVEALTHGSCMLPDIIPRCYCRLEFLC  
SiDCL1 GDEFDEETEEGELDNDSSGYRVLSSKTMADVVEALIGVYVVEGGKYAANHFMKWLGVEVDVDFNF--KETEYSIRCSIPENVLKSVEFDALQGALNIFSHNDKGLLEALTHASRPS-SGVSCYCRLEFLC  
MiDCL1 HDDYDEEEMEDGELEGDSSYRVLSKTIADVVEALIGVYVVEGGKYAANHLSWIGIQVEVDPE--MIDCPIRPSYLPESILKSDVEALGALNIFKIDRSLLVEALTHASRPS-SGVSCYCRLEFLC  
AtDCL1 SDVFDGEDMEGELGDLSSYRVLSKTIADVVEALIGVYVVEGGKYAANHLSWIGIQVEVDPE--EVDGTLKNNVNPESVLKSIDFVGLRALKYFKEKGLLEALTHASRPS-SGVSCYCRLEFLC  
AtDCL3 PKFFTE-NMTIKIGKSCDMGHRWVSKSVSDCAEALIGAYVVGGLSASLHMKWLGIDVDVDFPNL--VVEAINRVSLRCYIPKEDLEIELRKLQHEFSAKFLLEALTHASRPS--SYSCYCRLEFLC  
MiDCL3 GDFFTD-DTKVVVGKLCDKGHRWVSKTISDCVEALIGAYVVGGLVAAHLMKWLGIDANIEPSL--IIVEAITCASIRSYVPKTNELIKDINKVGYFHSVKFLLEALTHASVNE--FYCYCRLEFLC  
SiDCL3 KKFLTE-DPKEVVGKHCDRGHRWVSKTISDCVEALIGAYVVGGLVAAHLMKWLGFKAELEPSL--VEDAINTASLYSYTPKAKDIEDLELKLAYKFSIKGLLEALTHATVQLEAGYSYCRLEFLC

RIBOc

Ribonuclease\_3

1,830 1,840 1,850 1,860 1,870 1,880 1,890 1,900 1,910 1,920 1,930 1,940 1,950

AtDCL4 DAVLDYLMTSYFHTVFPKIKPGCLTDLRSLSVNNNEALANVAVSFSIKRFFCFESIYLHEVTEEDYTNFLASSPLASG--QS--EGPRCPKVLGDLVESLIGALFLDCGFNLNHWMTVMLSFIDPVKNLSN  
MiDCL4 DAVLDYLMTSYFHTVFPKIKPGCLTDLRSLSVNNNEALANVAVDRSLNFI LFDSSGLSEAINNYVKFIETSPSSKK--FI--EGTKCPKALGDLVESLIGALFLDCGFNLSTWMTIMLSFFKPVLSNCGM  
SiDCL4 DAVLDYLMTSYFHTVFPKIKPGCLTDLRSLSVNNNTAVVAVRQSFSEILCDSDLESITRYVNF IGRPDSTR--LG--EEPSCPKALGDLVESLIGALFLDCGFNLNRAWQILSFLKPVMSFTRIL  
SiDCL2d DAVLDYVVTIHLHYFKYPGLTPGCLTDLRSASVNNNECVALSAVKAGLHKHILHSDLDLQVLQRHISTTVEDFDKLNLVSTFGWE--AETTYPKVLGDLVESLIGALFLDCGFNQDITFIQIRPLLEPLVTPQTL  
SiDCL2c DAVLDYVVTIHLHYFKYPGLTPGCLTDLRSASVNNNECVAQCAIKASLHKHILHASPDQLRQICNTIEDFKN--PVSTFGWE--AETTYPKVLGDLVESLIGALFLDCGFNQDITFIQIRPLLEPLVTPQTL  
SiDCL2a DAVLDYVVTIHLHYFKYPGLTPGCLTDLRSASVNNNECVAQSAVKAGLHKHILHASQDLRQICNTIEDFKN--PVSTFGWE--AETTYPKVLGDLVESLIGALFLDCGFNQDITFIQIRPLLEPLVTPQTL  
SiDCL2b DAVLDYVVTIHLHYFKYPGLTPGCLTDLRSASVNNNECVAQSAVKAGLHKHILHASQDLRQICNTIEDFKN--PVSTFGWE--AETTYPKVLGDLVESLIGALFLDCGFNQDITFIQIRPLLEPLVTPQTL  
AtDCL2 DAVLDYLITIKHYLDKYPCLSPGCLTDMRSASVNNNECVALSAVKANLHKHILHASHHLHKHISRTVSEFEQSSLSQSTFGWE--SDISFPKVLGDLVESLIGALFLDCGFNQDITFIQIRPLLEPLVTPQTL  
MiDCL2a DAVLDYLITIKHYLNKYPGMCSCCLTDMRSASVNNNECVAQSSVKHGLHKHILHCSRRLHKOIHATVSEFEKSPSGSTFGWE--SESSFPMVLGDLVESLIGALFLDCGFNQDITFIQIRPLLEPLVTPQTL  
MiDCL2b DAVLDYLITIKHYLNKYPGMCSPGCLTDLRSASVNNNECVAQSSVKHGLHKHILHCSNELSKQIFATVERFEKSPSGSTFGWE--SESSFPMVLGDLVESLIGALFLDCGFNQDITFIQIRPLLEPLVTPQTL  
SiDCL1 DAVLDHLITRHLHFTYTDLPPIGRCLTDLRAAAVNNNEARVAVKHKHILHVRHGSALERQIRDFVKEVQDEL SKPGENS FGLGDCKAPKVLGDLVESLIGALFLDCGRNTAVMWKVFRLPHPMVTPETIL  
MiDCL1 DAVLDHLITRHLHFTYTDLPPIGRCLTDLRAAAVNNNEARVAVKHKHILHVRHGSALERQIRDFVKEVQDEL SKPGENS FGLGDCKAPKVLGDLVESLIGALFLDCGRNTAVMWKVFRLPHPMVTPETIL  
AtDCL1 DAVLDHLITRHLHFTYTDLPPIGRCLTDLRAAAVNNNEARVAVKHKHILHVRHGSALERQIRDFVKEVQDEL SKPGENS FGLGDCKAPKVLGDLVESLIGALFLDCGRNTAVMWKVFRLPHPMVTPETIL  
AtDCL3 DSVLDLITRHLHFTYTDLPPIGRCLTDLRSASVNNNEARVAVKNNHILHVRQCATVLETOINDYIMSFQKPD-----TGRSIPSIQCPKALGDLVESLIGALFLDCSKLNLDEMVKIFKPLLEPLVTPQTL  
MiDCL3 DAVLDLITIKHYLYQSRDIDPCECLTDLRSASVNNNEARVAVRNNLHKHILHQSSTLILSQITEYVKSFPPELSD-----TISSGPTTKAPKALGDLVESLIGALFLDCSKLNLDEMVKIFKPLLEPLVTPQTL  
SiDCL3 DSVLDLITVITYLYQKFKDIDPCECLTDLRSASVNNNEARVAVRNNLHKHILHQSSTLILSQITEYVKSFPPELSD-----TISSGPTTKAPKALGDLVESLIGALFLDCSKLNLDEMVKIFKPLLEPLVTPQTL

Ribonuclease\_3

AtDCL4  
MiDCL4  
SIDCL4  
SIDCL2d  
SIDCL2c  
SIDCL2a  
SIDCL2b  
AtDCL2  
MiDCL2a  
MiDCL2b  
SIDCL1  
MiDCL1  
AtDCL1  
AtDCL3  
MiDCL3  
SIDCL3

```

      2,090      2,100      2,110      2,120      2,130      2,140      2,150      2,160      2,170      2,180      2,190      2,200      2,210
-----NSER-----SSSYVIRR-----GLPQAPSK-T-----EDRL-----PQKAI I KAGGPSKKT-----AKSLIHEITAVANCWK PPH ECCEEE
-----NVDSDIFSDSDMSDNSSPAITQV---NRWSSLASKE-----VRRQPSSETV-----SDPN-----GDNE SPASGGPA NK S-----ARSHIHEITAVANCWK PPFYECCEEE
-----ETSESDCHLKVPVNEEL---ARSCNFKSKST-----RKLLSTEASVQCNSDQT I-----MSGNG-----SKEDAKATGGSKTES-----AKSR IHEITAVANCWK PPLFECCKET

DLELR TADSSFWDDR AKAQETLQALTDVKDRINLLTEFKTKVDDAVTIVNLTEEMDSIDAGLLEEAAGIIEELSKALDRFELTQLLSGPYDKEGAVISITA---GAGC---TDAQDWADMLLRMYVRW
DLELKTADSSFWDDR AKAQEILQALTDVKDRINLLTEFKTKVEDAVTIVNLTEEMDSIDAGLLEEA AVI IKELSKALDRFELTQLLSGPYDKEGSMNL FAMQHMAGAGAPLPLISLTQDWADMLLRMYVRW
-----AD-----DTKKKKKN---GNP SFTTRQTINDICLRKNWPMPL YRCVHEG
-----GDE-----NGKKKKKN---GNQTFTRQTINDICLRKNWPMPL FYRCVSEG
-----E--D-----QGEN-----ENGKKKN---GHQPFTRQTINDICLRKNWPMPL SYRCVKEG
-----S-----DRET-----L-----TSETTE-----IQSIVIPF IGPI N---MKKGGPRTIHEFCKKHLWPMPLTDTSEEK
-----Q-----TSDEYLPEQAAC-----KKLKGSE-----IQNPVCDSSKKAC-----SSTNATPIIAP I N---MKKGGPRTSIFQLCKTMLWPMPLTDTTEHK
-----M---ASRKKRKKVYLN N-----KTDE-----AQSVPSDCSTSSS-----YSNKDTQVIGPI N---MTRGGPRI SIFELCKKLQWPMPLSHESTERT
```

DSRM\_DCL\_plant

AtDCL4  
MiDCL4  
SIDCL4  
SIDCL2d  
SIDCL2c  
SIDCL2a  
SIDCL2b  
AtDCL2  
MiDCL2a  
MiDCL2b  
SIDCL1  
MiDCL1  
AtDCL1  
AtDCL3  
MiDCL3  
SIDCL3

```

      2,220      2,230      2,240      2,250      2,260      2,270      2,280      2,290      2,300      2,310      2,320      2,330      2,340
GP-----GHLKKS-----FVYKVIIEVEDAPNMTLCYGHARVTKKGA-----HHAQAALWCKKHSGLFC
GP-----SHLKKS-----FTYKVIIEIEGAPDIVLCFGAPQTKKAAA-----HYAAEGAYWYCKEGYWT
GP-----SHLKKE-----FTFRVLYEIEETSR-VIISYGHAAQAKKKDAA-----HHAAGALLWFKKEGYLL-----DN

GE-----K--QR-----YKTRV-----VEKSPGHEAGIKSATVEVEGRYAYGYLSGEKGTHRIVROSPFNAKGL-----RQTSFSGVEVMPLLRREESLDVEI
GE-----K--QR-----YKTRV-----VEKSPGHEAGIKSATVEVEGRYAYGYLSGEKGTHWIVROSPFNAKEGTWLSNINHMLPRTGLNHTPSSFAFSSPMTSFSGVEVMPLIPEESLDVEI
GP-----AHAKR-----FTYCVRVNIISDKGF-TDICI GHPMP SVKKAK-----DSAAALLLEL LNRYS
GP-----AHAKR-----FTFAYRVNNTTDRGW-TDICI GHPMP SVKKAK-----DSAAVL LLEL LNKWYS
GP-----AHAKR-----FTFCVRVNTSDRGW-TDICI GHPMP SVKKAK-----DSAAVL LLEL LNKTF S
SRTPFEFIDGGEKRTSFSSFTSTITIRIPNRE--AVMYAGHARPDKKS SF-----DSAVVELLYELERKIV I I QK
SRTPMIFDEISCKREGFNSI SKITTHIPGSG--NICTGPRADKKS SF-----DSAAALLMINSFEREGK I I SDS
SKSLIECGEGSDKRKVYNTFASRTISLTIPDYG--LIELTGDERADKKS SL-----DSAA LHMLYELERQGI I AIGNQ
```

DSRM\_DCL\_plant
