# Supplementary material for: Genome-wide identification of gene families related to miRNA biogenesis in Mangifera indica L. and their possible role during heat stress
Source: PeerJ journal article supplement (doi:10.7717/peerj.17737), 2024-07-17
Supplement: FigS4.pdf [file FigS4.pdf]

SIAGO15  
AtAGO6  
MiAGO6  
SIAGO6  
AtAGO8  
AtAGO9  
SIAGO4c2  
AtAGO4  
MiAGO4b  
MiAGO4a  
SIAGO4a  
SIAGO4b  
SIAGO4c  
AtAGO2  
AtAGO3  
MiAGO2b  
MiAGO2a  
SIAGO3  
SIAGO2a  
SIAGO2b  
AtAGO7  
SIAGO7  
MiAGO7a  
MiAGO7b  
AtAGO1  
SIAGO1a  
SIAGO1b  
MiAGO1a  
MiAGO1b  
AtAGO10  
SIAGO10  
SIAGO10a  
MiAGOPNH1  
SIAGO10b  
MiAGOMEL1  
SIAGO5  
MiAGO5  
AtAGO5

```

1      10      20      30      40      50      60      70      80      90      100     110     120     130
ME-----RGRGGRGDG-----RGRGGRGYGG-----GGGGG-----EQGRDRGYGGGEQGRGR-----
MD-----RGRGGRGDG-----RGRGGGGDRGRGYSGRGDGRGRGGDGRGYSGRGDGHGRGGGGDRGRGYSGRGDGRGRGGGGDRGR-----
ME-----RGRGGRGGG-----RGGGGGRRGGG-----GGGRGRGGGG-----SGRDGG--YGGGR-----S-----GGYGAGGRGG-----
ME-----RGRGGRGGGR-----GGGGVGRGGGG-----GGGGRRGGGG-----GGRNGGYGYGGGR-----S-----GGYRGGGRD-----
WD-----RGNNGRGGDR-----KRGRN-----SDR-VPGHNEQRQG-----PARG-----YYPD-----S-QYR-----AR-----
WD-----RGNYRRGGGHD-----NAGRGGNRGRGQGR-GGGRGEPQIG-----GGRG-GTHIGGGS-----QMGQP-----PQQWGNQPRGS-----
WD-----RGNYQRRGGD-----RGN-----NTGRGRGNRGR-----GGRGGTHVG-----GGRG-GPQMGS-----FHQP-----PQQWGNQPRGS-----
MEEKT-----HHHHHSTNKHIP-----S-----S-----SKSRTPLLHKPYHHHVQTNP-PPFL LHPSSHQNLNLVAS-----
MEHT-----EN-----S-----S-----NKCNKS-TTAKICPNNNNN-----
MEET-----EDP-----N-----N-----AT-----KKCTTKA-RSFRGRTNPHKH-----
MEET-----DDP-----N-----N-----AN-----KKCTTKT-TSFRGRTNPKH-----
WVRKR--RTDAPSEGGEGSREAGFVSGGGR-GSQR-----GGFQQGGGQHQG-----GRGYTPPQQGGRR-----GYGPPQQQQY-----GGPQ-YQGRGRG-----
WVRKR--RTDVPGGA-ESSESHETGGRG--G-VQRP-----PPQQQ-----QGG-----GRGSGP-----QRGGYGGRGGGGAPRGGIAPQQSY-----GGPPE-YYQGRGT-----
WARKR--RSELPGSG-ESSGSQETVCGQG--R-GQYP-----PQQQ-----EA-----S-----SAPPE-QQGRGRG-----
WVRKR--RTEIPSESSSQETSAGGG--R-GSQRATERSAPPNQSGG-----G-----GRGWGPQSQQGGRRGGYGGGGGGGRGRGSPQQQY-----GGPPE-QQGRGRG-----
MVTLLIYTV-VIIVRKR--RTELPSSGGESSSQEASASG--R-GSQRPTERSAPPQQGGGGFQGG-----GRGWGSQSQQGGRRGGYGG-----GRGRGPPQQQY-----SAPPE-QQGRGRG-----
MPTIRQMKDSSETHVIK---TQPL---KHHNP-KTQNGKI PPPSPSPVTVTTATVT-----QSQ-----ASSPS-PPSKNRSR-----
MPTIRQMKDSSEQHVIK---SHLQNTMSQAQKQP-KTQNGKPPHQEPQHS-----KP-----HSQTS-PPTKNRGR-----
MPTIRQMKESSEQHVIK---PHLQNTMNPVQKNP-KTQNGKPPHQEPNN-----KI-----HIQTS-PPSRNRGR-----
MPTIRQIRVP-EDYV---MSMNQKLFQ-AMF---RTGDNF-----E-----DVKD-SIGRKRGR-----
MKLELE-QKHVSR---TPLQESLNQNAQCQ-SS---GEHSRM-----E-----VKRHN-NAGKRGR-----
MSLFHY---TEIQLF FSL LFFSL LTM-----ERGRGR-----RGGSPYGG-----GRGGGRTPPYGGGR-----GDGRTPPYG---GGRGGRT-SPSDGRG-----
M-----NRGGGG-----HGGASR-----GRGGRRSDSRPAEPA-----P-VRDQSFQRGTGRSGGGR-----GRRPG-----
M-----NRGGGG-----HGGASR-----GRGGRRSDSRQDQSS-----GQVAVPGLQQSYGRRGGSV-----SAGR-----

```

**GRA1**

SIAGO15  
AtAGO6  
MiAGO6  
SIAGO6  
AtAGO8  
AtAGO9  
SIAGO4c2  
AtAGO4  
MiAGO4b  
MiAGO4a  
SIAGO4a  
SIAGO4b  
SIAGO4c  
AtAGO2  
AtAGO3  
MiAGO2b  
MiAGO2a  
SIAGO3  
SIAGO2a  
SIAGO2b  
AtAGO7  
SIAGO7  
MiAGO7a  
MiAGO7b  
AtAGO1  
SIAGO1a  
SIAGO1b  
MiAGO1a  
MiAGO1b  
AtAGO10  
SIAGO10  
MiAGOPNH1  
SIAGO10b  
MiAGOMEL1  
SIAGO5  
MiAGO5  
AtAGO5

```

140     150     160     170     180     190     200     210     220     230     240     250     260
-----GSERGGGNGRQGRGEQQDFRS-----
-----GYSCRGDGHGRGGGGDRGRGYSGRGRGFVQDRDGGWVNPQSSGGHVRGRGTQLQPPPPQEVPPSSSSQAQVSQGVAPGDVGGGGVGDVGRDGVGDVGRDGVGDVGGGGVGDVGVGDVGGGGVGDV
-----GGGNVRGRGGDYVRS--YDRDHQWGSSEQTPWGSTSTSTST-----
-----SGGGRNARGRR-----
-----AYYE-----EEQGRARQ-----HEEQGRARVQHEQE-----
-----GQYC-----IRGGAPQNPQGNYPVNQNPGRGGTWNQP-----
-----GQYC-----FRGAP-----PGRGGTWNQP-----
NLPSSYYYYYCYF-----
NNNN--HYIAFG-----FH-----
QYQH--HLFCYS-----NH-----
QYQH--QLFCYS-----NH-----
-----PPHGG-----RGG-----
-----QQYCRG-----GGQ-----
-----QTQGG-----RGG-----
-----QAQGG-----RGG-----
-----R--RN-----RGG-----
-----R--RG-----RGG-----
-----R--RG-----RGG-----
-----R--RC-----RGA-----
-----R--KG-----KGI-----
-----S-----KAR-----
-----GYQSPG-----GRG-----
-----G-----GGR-----
-----G-----NVG-----

```

**GRA1**



|           |              |                |                |                     |            |           |           |            |          |         |             |            |         |              |         |              |              |              |               |               |               |
|-----------|--------------|----------------|----------------|---------------------|------------|-----------|-----------|------------|----------|---------|-------------|------------|---------|--------------|---------|--------------|--------------|--------------|---------------|---------------|---------------|
|           | 540          | 550            | 560            | 570                 | 580        | 590       | 600       | 610        | 620      | 630     | 640         | 650        | 660     | 670          |         |              |              |              |               |               |               |
| SIAGO15   | HTMVLDAATSR  | RWKT-DGNLSGDGE | ---LSEGDQRKQK  | I                   | SRFKTFRQIN | FVSTIPFKT | MPDGKGVK  | ---SRNNEVL | IADTIL   | HSNAKRC | ILHTDPQKNSL | LRQSYF     | PNEMKN  | ----FMDITGGI |         |              |              |              |               |               |               |
| AtAGO6    | HLVIVEGSFSK  | DCGCVSDGG-S    | SSGTCRKRSK     | S                   | FLPRS      | YKVOIHYA  | AEIPEK    | TVLGTOR    | GAYTP    | DKSADQ  | ALRVLDIVLR  | Q0AA       | ---ERGL | LRQAF        | HS5DGH  | ----MKVGGGV  |              |              |               |               |               |
| MiAGO6    | HTVILEESRAK  | HESG---        | SPNGGSS        | ---VDTCRKRSK        | C          | FSKSTK    | VEISYA    | AKIPEK     | SIDIT    | TKGN    | EVHNNADQ    | ALRVLDIVLR | Q0AA    | ---NRGCL     | LRQSF   | HDDSRN       | ----FVDVGGGV |              |               |               |               |
| SIAGO6    | HTVVEEESAR   | QASE---        | SPSDNGS        | ---LNHSYIKRFK       | S          | LHSKAL    | VEIDYA    | AKIPEK     | SRVDLAI  | QGA     | DP---ENVQD  | ALRVLDIVLR | QKAA    | ---NRGCL     | LRQSF   | HDDSRN       | ----FTDVGEGV |              |               |               |               |
| AtAGO8    | HTSVLVEEAPSR | RNA-----       | DKRLKL         | PHQSK               | ENVAEIL    | FAPPEI    | PMEAI     | ANABQK     | K---TKHL | LDALRV  | MDILVLR     | QNA        | ---RQGL | LRQSF        | HNDAKY  | ----FANVGGGV |              |              |               |               |               |
| AtAGO9    | HTSVLVEEIPSS | RNHA-----      | GNDTNDADRKR    | SRFPNQTK            | ENVAEISYA  | AKIPEK    | QAIASA    | BQK        | E---TENL | QDALRV  | MDILVLR     | QSA        | ---RQGL | LRQSF        | HNDVKN  | ----FVPIGGGV |              |              |               |               |               |
| SIAGO4c2  | HTDVLVEDVSS  | RTDR---        | GSPDG---       | SPSDVDRKR           | SKQPWS     | AKYKVIK   | YA        | AKIPEK     | QAIANA   | BQK     | D---SEQV    | QAVRVD     | ILVLR   | QHAA         | ---KRGL | LRQSF        | HNEPRN       | ----FVDVGGGV |               |               |               |
| AtAGO4    | HTSVLVEEVSAT | RAN---         | GNGSPNGNES     | ---PSDGRKRLRF       | P          | NRSK      | FRVETISYA | AKIPEK     | QAIANA   | BQK     | E---SENS    | QAVRVD     | ILVLR   | QHAA         | ---RQGL | LRQSF        | HNDPTN       | ----CEPVGGNI |               |               |               |
| MiAGO4b   | HTMVLVEEIS   | RNYG---        | NGSPDGHS       | ---PNSDRKRRLRF      | P          | YHSK      | TKVEISFA  | AKIPEK     | QAIANA   | BQK     | E---SENS    | QAVRVD     | ILVLR   | QHAA         | ---RQGL | LRQSF        | HNDPKN       | ----FTDVGEGV |               |               |               |
| MiAGO4a   | HTMVLVDVINS  | RNYG---        | GNSPGGHS       | ---PNEADRKRRLRF     | P          | YHSK      | TKVEISFA  | AKIPEK     | QAIANA   | BQK     | E---SENS    | QAVRVD     | ILVLR   | QHAA         | ---RQGL | LRQSF        | HNDPKN       | ----FVDVGGGV |               |               |               |
| SIAGO4a   | HTMVLVDITSN  | RNYG---        | RNGTNGNS       | ---SPGRHGSPPNETDRKR | RLFP       | YQSK      | TKVEISFA  | AKIPEK     | QAIANA   | BQK     | E---SENS    | QAVRVD     | ILVLR   | QHAA         | ---KQGL | LRQSF        | HNDPKN       | ----FADVGGGV |               |               |               |
| SIAGO4c   | HTMVLVDITSN  | RNYGT          | ---SSPPNEADRKR | RLRF                | P          | YQSK      | TKVKISLA  | GKIPEK     | QAIANAF  | BQK     | E---YENS    | QAVRVD     | ILVLR   | QHAA         | ---KQGL | LRQSF        | HNDNN        | ----FVDVGGGV |               |               |               |
| AtAGO2    | HTKVEYPKTEE  | ---            | NYGDLREKQK     | PKKI                | ER         | FRVNYKLV  | SKFDGK    | EQR---     | KEG      | EDWAP   | LPPEYI      | HA         | DVILVLR | ANPME        | ---     | KCT          | SIGR         | SYSSMG       | ----SKEITGGGA |               |               |
| AtAGO3    | HTMVFSETEEI  | ---            | KSGEIVLKLQK    | GGQ                 | IK         | FRVNYKLV  | SKFDGK    | ELNSY      | INK      | EGDDG   | SSPL        | PODY       | HA      | DVILVLR      | ESPTE   | ---          | KCT          | TAGR         | SYSSCMG       | ----KQDITGGGA |               |
| MiAGO2b   | HTMVFSEADL   | ---            | PYGFNDLKQK     | OKQ                 | IK         | FRVNYKLV  | SKFDGK    | ELNSY      | SK       | EGDD    | WIP         | LP         | PODY    | HA           | DVILVLR | TPSE         | ---          | KCT          | PWGR          | SILYSSMG      | ----TKEITGGGA |
| MiAGO2a   | HTMVFSEMED   | ---            | PYGFNDPKQK     | OKQ                 | IK         | FRVNYKLV  | SKFDGK    | ELNSY      | SK       | EGDD    | WIP         | LP         | PODY    | HA           | DVILVLR | DSPE         | ---          | KCT          | PWGR          | SILYSSMG      | ----TKDITGGGV |
| SIAGO3    | HTMVFSEMED   | ---            | PYGFNDPKQK     | OKQ                 | IK         | FRVNYKLV  | SKFDGK    | ELNSY      | SK       | EGDD    | WIP         | LP         | PODY    | HA           | DVILVLR | DSPE         | ---          | KCT          | PWGR          | SILYSSMG      | ----TKDITGGGV |
| SIAGO2a   | HTMVFSEMED   | ---            | PYGFNDPKQK     | OKQ                 | IK         | FRVNYKLV  | SKFDGK    | ELNSY      | SK       | EGDD    | WIP         | LP         | PODY    | HA           | DVILVLR | DSPE         | ---          | KCT          | PWGR          | SILYSSMG      | ----TKDITGGGV |
| SIAGO2b   | HTMVFSEMED   | ---            | PYGFNDPKQK     | OKQ                 | IK         | FRVNYKLV  | SKFDGK    | ELNSY      | SK       | EGDD    | WIP         | LP         | PODY    | HA           | DVILVLR | DSPE         | ---          | KCT          | PWGR          | SILYSSMG      | ----TKDITGGGV |
| AtAGO7    | HTMVFSEMED   | ---            | PYGFNDPKQK     | OKQ                 | IK         | FRVNYKLV  | SKFDGK    | ELNSY      | SK       | EGDD    | WIP         | LP         | PODY    | HA           | DVILVLR | DSPE         | ---          | KCT          | PWGR          | SILYSSMG      | ----TKDITGGGV |
| SIAGO7    | HTMVFSEMED   | ---            | PYGFNDPKQK     | OKQ                 | IK         | FRVNYKLV  | SKFDGK    | ELNSY      | SK       | EGDD    | WIP         | LP         | PODY    | HA           | DVILVLR | DSPE         | ---          | KCT          | PWGR          | SILYSSMG      | ----TKDITGGGV |
| MiAGO7a   | HTMVFSEMED   | ---            | PYGFNDPKQK     | OKQ                 | IK         | FRVNYKLV  | SKFDGK    | ELNSY      | SK       | EGDD    | WIP         | LP         | PODY    | HA           | DVILVLR | DSPE         | ---          | KCT          | PWGR          | SILYSSMG      | ----TKDITGGGV |
| MiAGO7b   | HTMVFSEMED   | ---            | PYGFNDPKQK     | OKQ                 | IK         | FRVNYKLV  | SKFDGK    | ELNSY      | SK       | EGDD    | WIP         | LP         | PODY    | HA           | DVILVLR | DSPE         | ---          | KCT          | PWGR          | SILYSSMG      | ----TKDITGGGV |
| AtAGO1    | HTMVFSEMED   | ---            | PYGFNDPKQK     | OKQ                 | IK         | FRVNYKLV  | SKFDGK    | ELNSY      | SK       | EGDD    | WIP         | LP         | PODY    | HA           | DVILVLR | DSPE         | ---          | KCT          | PWGR          | SILYSSMG      | ----TKDITGGGV |
| SIAGO1a   | HTMVFSEMED   | ---            | PYGFNDPKQK     | OKQ                 | IK         | FRVNYKLV  | SKFDGK    | ELNSY      | SK       | EGDD    | WIP         | LP         | PODY    | HA           | DVILVLR | DSPE         | ---          | KCT          | PWGR          | SILYSSMG      | ----TKDITGGGV |
| SIAGO1b   | HTMVFSEMED   | ---            | PYGFNDPKQK     | OKQ                 | IK         | FRVNYKLV  | SKFDGK    | ELNSY      | SK       | EGDD    | WIP         | LP         | PODY    | HA           | DVILVLR | DSPE         | ---          | KCT          | PWGR          | SILYSSMG      | ----TKDITGGGV |
| MiAGO1a   | HTMVFSEMED   | ---            | PYGFNDPKQK     | OKQ                 | IK         | FRVNYKLV  | SKFDGK    | ELNSY      | SK       | EGDD    | WIP         | LP         | PODY    | HA           | DVILVLR | DSPE         | ---          | KCT          | PWGR          | SILYSSMG      | ----TKDITGGGV |
| MiAGO1b   | HTMVFSEMED   | ---            | PYGFNDPKQK     | OKQ                 | IK         | FRVNYKLV  | SKFDGK    | ELNSY      | SK       | EGDD    | WIP         | LP         | PODY    | HA           | DVILVLR | DSPE         | ---          | KCT          | PWGR          | SILYSSMG      | ----TKDITGGGV |
| AtAGO10   | HTMVFSEMED   | ---            | PYGFNDPKQK     | OKQ                 | IK         | FRVNYKLV  | SKFDGK    | ELNSY      | SK       | EGDD    | WIP         | LP         | PODY    | HA           | DVILVLR | DSPE         | ---          | KCT          | PWGR          | SILYSSMG      | ----TKDITGGGV |
| MiAGO10   | HTMVFSEMED   | ---            | PYGFNDPKQK     | OKQ                 | IK         | FRVNYKLV  | SKFDGK    | ELNSY      | SK       | EGDD    | WIP         | LP         | PODY    | HA           | DVILVLR | DSPE         | ---          | KCT          | PWGR          | SILYSSMG      | ----TKDITGGGV |
| SIAGO10a  | HTMVFSEMED   | ---            | PYGFNDPKQK     | OKQ                 | IK         | FRVNYKLV  | SKFDGK    | ELNSY      | SK       | EGDD    | WIP         | LP         | PODY    | HA           | DVILVLR | DSPE         | ---          | KCT          | PWGR          | SILYSSMG      | ----TKDITGGGV |
| MiAGOPNH1 | HTMVFSEMED   | ---            | PYGFNDPKQK     | OKQ                 | IK         | FRVNYKLV  | SKFDGK    | ELNSY      | SK       | EGDD    | WIP         | LP         | PODY    | HA           | DVILVLR | DSPE         | ---          | KCT          | PWGR          | SILYSSMG      | ----TKDITGGGV |
| SIAGO10b  | HTMVFSEMED   | ---            | PYGFNDPKQK     | OKQ                 | IK         | FRVNYKLV  | SKFDGK    | ELNSY      | SK       | EGDD    | WIP         | LP         | PODY    | HA           | DVILVLR | DSPE         | ---          | KCT          | PWGR          | SILYSSMG      | ----TKDITGGGV |
| MiAGOMEL1 | HTMVFSEMED   | ---            | PYGFNDPKQK     | OKQ                 | IK         | FRVNYKLV  | SKFDGK    | ELNSY      | SK       | EGDD    | WIP         | LP         | PODY    | HA           | DVILVLR | DSPE         | ---          | KCT          | PWGR          | SILYSSMG      | ----TKDITGGGV |
| SIAGO5    | HTMVFSEMED   | ---            | PYGFNDPKQK     | OKQ                 | IK         | FRVNYKLV  | SKFDGK    | ELNSY      | SK       | EGDD    | WIP         | LP         | PODY    | HA           | DVILVLR | DSPE         | ---          | KCT          | PWGR          | SILYSSMG      | ----TKDITGGGV |
| MiAGO5    | HTMVFSEMED   | ---            | PYGFNDPKQK     | OKQ                 | IK         | FRVNYKLV  | SKFDGK    | ELNSY      | SK       | EGDD    | WIP         | LP         | PODY    | HA           | DVILVLR | DSPE         | ---          | KCT          | PWGR          | SILYSSMG      | ----TKDITGGGV |
| AtAGO5    | HTMVFSEMED   | ---            | PYGFNDPKQK     | OKQ                 | IK         | FRVNYKLV  | SKFDGK    | ELNSY      | SK       | EGDD    | WIP         | LP         | PODY    | HA           | DVILVLR | DSPE         | ---          | KCT          | PWGR          | SILYSSMG      | ----TKDITGGGV |

ArgN

A1

A1

|          |     |     |     |     |     |     |     |     |     |     |     |     |     |   |   |   |   |   |   |   |   |     |     |   |   |   |   |   |   |   |   |   |   |   |   |   |   |   |   |   |   |     |   |     |     |   |   |   |   |   |   |     |   |   |   |   |     |     |   |   |   |   |     |   |   |   |     |   |   |   |   |   |   |   |   |   |   |   |   |   |     |   |   |   |   |   |   |   |   |   |     |   |   |   |   |   |   |   |   |   |   |   |   |   |   |   |   |   |   |   |   |   |
|----------|-----|-----|-----|-----|-----|-----|-----|-----|-----|-----|-----|-----|-----|---|---|---|---|---|---|---|---|-----|-----|---|---|---|---|---|---|---|---|---|---|---|---|---|---|---|---|---|---|-----|---|-----|-----|---|---|---|---|---|---|-----|---|---|---|---|-----|-----|---|---|---|---|-----|---|---|---|-----|---|---|---|---|---|---|---|---|---|---|---|---|---|-----|---|---|---|---|---|---|---|---|---|-----|---|---|---|---|---|---|---|---|---|---|---|---|---|---|---|---|---|---|---|---|---|
|          | 680 | 690 | 700 | 710 | 720 | 730 | 740 | 750 | 760 | 770 | 780 | 790 | 800 |   |   |   |   |   |   |   |   |     |     |   |   |   |   |   |   |   |   |   |   |   |   |   |   |   |   |   |   |     |   |     |     |   |   |   |   |   |   |     |   |   |   |   |     |     |   |   |   |   |     |   |   |   |     |   |   |   |   |   |   |   |   |   |   |   |   |   |     |   |   |   |   |   |   |   |   |   |     |   |   |   |   |   |   |   |   |   |   |   |   |   |   |   |   |   |   |   |   |   |
| SIAGO15  | L   | G   | R   | G   | H   | S   | F   | R   | T   | A   | G   | G   | L   | S | N | I | D | V | S | T | T | --- | T   | L | I | P | G | P | L | V | N | F | M | A | N | Q | N | V | E | I | P | --- | F | K   | I   | D | W | T | K | A | R | --- | I | L | K | N | R   | I   | K | L | H | S | --- | N | R | E | H   | K | I | T | G | L | S | N | R | T | C | K | E | K | I   | L | L | R | L | R | G | S | N | Q | N   | D | N | G | O | T | V | E | I | T | V | Y | E | F | V | R | R | C | G | I | E | L |
| AtAGO6   | I   | G   | I   | R   | G   | L   | H   | S   | F   | R   | P   | H   | G   | L | S | N | I | D | V | S | T | T   | --- | M | I | L | E | P | G | P | V | I | D | F | L | K | A | N | Q | S | V | E   | T | P   | --- | R | O | I | D | W | I | K   | A | A | K | M | L   | --- | M | R | V | K | A   | T | H | R | --- | N | M | E | F | K | I | T | G | L | S | K | P | C | N   | Q | F | P | M | K | V | K | N | A | --- | N | E | G | O | T | V | E | I | T | V | Y | E | F | V | R | R | C | G | I | E |   |
| MiAGO6   | T   | G   | I   | R   | G   | L   | H   | S   | F   | R   | P   | H   | G   | L | S | N | I | D | V | S | T | T   | --- | M | I | L | E | P | G | P | V | I | D | F | L | K | A | N | Q | S | V | E   | T | P   | --- | R | O | I | D | W | A | R   | A | K | M | L | --- | N   | M | E | F | K | I   | T | G | L | S   | K | P | C | N | Q | F | P | M | K | V | K | N | A | --- | N | E | G | O | T | V | E | I | T | V   | Y | E | F | V | R | R | C | G | I | E |   |   |   |   |   |   |   |   |   |   |   |
| SIAGO6   | M   | S   | C   | R   | G   | L   | H   | S   | F   | R   | P   | H   | G   | L | S | N | I | D | V | S | T | T   | --- | M | I | L | E | P | G | P | V | I | D | F | L | K | A | N | Q | S | V | E   | T | P   | --- | R | O | I | D | W | A | R   | A | K | M | L | --- | N   | M | E | F | K | I   | T | G | L | S   | K | P | C | N | Q | F | P | M | K | V | K | N | A | --- | N | E | G | O | T | V | E | I | T | V   | Y | E | F | V | R | R | C | G | I | E |   |   |   |   |   |   |   |   |   |   |   |
| AtAGO8   | D   | C   | C   | R   | G   | L   | H   | S   | F   | R   | P   | H   | G   | L | S | N | I | D | V | S | T | T   | --- | M | I | L | E | P | G | P | V | I | D | F | L | K | A | N | Q | S | V | E   | T | P   | --- | R | O | I | D | W | A | R   | A | K | M | L | --- | N   | M | E | F | K | I   | T | G | L | S   | K | P | C | N | Q | F | P | M | K | V | K | N | A | --- | N | E | G | O | T | V | E | I | T | V   | Y | E | F | V | R | R | C | G | I | E |   |   |   |   |   |   |   |   |   |   |   |
| AtAGO9   | S   | G   | C   | R   | G   | H   | S   | F   | R   | T   | A   | G   | G   | L | S | N | I | D | V | S | T | T   | --- | M | I | L | E | P | G | P | V | I | D | F | L | K | A | N | Q | S | V | E   | T | P   | --- | R | O | I | D | W | A | R   | A | K | M | L | --- | N   | M | E | F | K | I   | T | G | L | S   | K | P | C | N | Q | F | P | M | K | V | K | N | A | --- | N | E | G | O | T | V | E | I | T | V   | Y | E | F | V | R | R | C | G | I | E |   |   |   |   |   |   |   |   |   |   |   |
| SIAGO4c2 | S   | G   | C   | R   | G   | H   | S   | F   | R   | T   | A   | G   | G   | L | S | N | I | D | V | S | T | T   | --- | M | I | L | E | P | G | P | V | I | D | F | L | K | A | N | Q | S | V | E   | T | P   | --- | R | O | I | D | W | A | R   | A | K | M | L | --- | N   | M | E | F | K | I   | T | G | L | S   | K | P | C | N | Q | F | P | M | K | V | K | N | A | --- | N | E | G | O | T | V | E | I | T | V   | Y | E | F | V | R | R | C | G | I | E |   |   |   |   |   |   |   |   |   |   |   |
| AtAGO4   | L   | G   | R   | G   | H   | S   | F   | R   | T   | A   | G   | G   | L   | S | N | I | D | V | S | T | T | --- | M   | I | L | E | P | G | P | V | I | D | F | L | K | A | N | Q | S | V | E | T   | P | --- | R   | O | I | D | W | A | R | A   | K | M | L |   |     |     |   |   |   |   |     |   |   |   |     |   |   |   |   |   |   |   |   |   |   |   |   |   |     |   |   |   |   |   |   |   |   |   |     |   |   |   |   |   |   |   |   |   |   |   |   |   |   |   |   |   |   |   |   |   |

```
810          820          830          840          850          860          870          880          890          900          910          920          930
SIAGO15  GYSSNLPCINVGCSQKPKQFIPVELLCSLMP LQRFKKELSLHQRSLVNVNSSQKPIELMKHLNEELKANDY -----DKDPMLRACGLISLNKSYTVEGRVLPFPKLVV GKNKEYLASRF -----SRWSFNGK
AtAGO6  ISSAYFPCLDVGVKPDPRPNYLPLELFCNMLV LQRYTKPLSLSGQRVLVHSSRQKPLERIKTINDAMHTYCY -----NDKDPFLAGGLISLSEKEMTQVEGRVLPKPMKLF GKNEDFQPCN -----GRWNFNK
MiAGO6  TFSAYLPCLDVGVKPKRPNYLPLELFCNMLV LQRYTKPLSLSGQRASLVEKSRQKPKQEMQTLLTAAAMQYTCY -----DDDPVLGACGLISLSEKLTQDGRVLEAPKLVV GHNEDEVCPRN -----GRWNFNK
SIAGO6  SSSVYMPCLDVGVKPKRPNYLPLELFCNMLV LQRYTKPLSLSVQRASLVEKSRQKPKRERIKVITDAWRDYSY -----DDDPVLLVACGLISLSEKQLIOMNGRVLVEAPKLVV ENGEEVTPCD -----GRWNFNK
AtAGO8  RYSGGLPCINVGCKPNRPTYFPLELFCNMLV LQRYTKALTKFQRSNLVEESRQKPKQRIIGVITRALTKTSNY -----NDPMLQCSQVRLISGSDFTQVEGRVLPKLVV GKEQDIYPIN -----GSWVFNK
AtAGO9  RYSGDFPCINVGCKPRPTYPFLELFCNMLV LQRYTKSLTNFQRASLVEKSRQKPKPRMASITKQKDSNY -----NADPVLQDSQVSIITNFTQVEGRVLPKLVV SKGENLSPIK -----GKWNFMK
SIAGO4c2 RYSGEILPCINVGCKPKHPTFPLELFCNMLV LQRYTKALSLSGQRASLVEKSRQKPKRMRALTDALTKTSNY -----KADPPLGAGGLISLSEKEMTQVEGRVLPKLVV GDDQDLFPRN -----GRWNFNK
AtGO4  QYSADLPCINVGCKPKRPTYPFLELFCNMLV LQRYTKALTTFQRASLVEKSRQKPKRMTVLSKALVSNY -----DAEPLLRSCGLISLTSNFTQVEGRVLPKLVV ECGSETFPRN -----GRWNFNK
MiAGO4b RYXSADLPCINVGCKPKRPTYPFLELFCNMLV LQRYTKALNTLQRASLVEKSRQKPKRMTVLSNVLKSNKY -----DAEPLLRSCGLISLTSNFAKQVEGRVLSAPRKLKVM ENGDEFPRN -----GRWNFNK
MiAGO4a RYXSADVPCINVGCKPKRPTYPFLELFCNMLV LQRYTKALSTLQRASLVEKSRQKPKRMTVLSNVLKSNKY -----DAEPLLRSCGLISLTSNFTQVEGRVLSAPRKLKVM ENGDEFPRN -----GRWNFNK
SIAGO4a RYXSADLPCINVGCKPKRPTYPFLELFCNMLV LQRYTKSLSTLQRSSLVEKSRQKPKRMOQLSNALKINQY -----DAEPLLRSCGLISLTSNFTQVEGRVLPKLVV G-GDDFPRN -----GRWNFNK
SIAGO4b RYXSADLPCINVGCKPKRPTYPFLELFCNMLV LQRYTKALSTLQRASLVEKSRQKPKRMOQLSNALKINNY -----DAEPLLRSCGLISLTSNFTQVEGRVLPKLVV NGEDLFTRN -----GRWNFNK
SIAGO4c RYXSADLPCINVGCKPKRPTYPFLELFCNMLV LQRYTKALSTLQRASLVEKSRQKPKRMOQLSHALKMNNY -----DAEPLLRSCGLISLTSNFTQVEGRVLPKLVV GNGVDLFAQS -----GRWNFNK
AtGO2  VHK-DIPLCLDLCKNGRQNFVPMFECVLMVE GQIYFPEKDLNLDKDSALMVKKLSLVNPPQQRQRMNIDKMLKARNG -----SSGGEIIGNFGLVVDNMTPTVEGRVLPKLVV LAERGRVVEEPNPRQNNQVNM LMK
AtGO3  DHK-DIPLCLDLCKNGRQNFVPMFECVLMVE GQIYFPEKDLNLDKDSALMVKKLSLVNPPQQRQRMNIDKMLKARNG -----RGGDIIGNFGLVVDNMTPTVEGRVLPKLVV LADRGRVNIHEKLMSESNOWLTTK
MiAGO2b MYL-DIPLCLDLCKNGRQNFVPMFECVLMVE GQIYFPEKDLNLDKDSALMVKKLSLVNPPQQRQRMNIDKMLKARNG -----CGGEIIGNFGLVVDNMTPTVEGRVLPKLVV FVGAGGVKVISIQVEKEKQVNVN LVGK
MiAGO2a MYP-DIPLCLDLCKNGRQNFVPMFECVLMVE GQIYFPEKDLNLDKDSALMVKKLSLVNPPQQRQRMNIDKMLKARNG -----CGGAIIGNFGLVVDNMTPTVEGRVLPKLVV FVGAGGVKVISIQVEKEKQVNVN LVGK
SIAGO3  KNR-HLPSLNLCKGDKDNVYPMFECVLMVE GQYFPEKEDLDKDTALFLKNSISLARPPQRQAICEMVBAEDG -----RM-TIPDNFKIRVDNMTPTVEGRVLPKLVV G5GON---PPNLYKTCQWLVGK
SIAGO2a QFK-DIPLCLDLCKNGRQNFVPMFECVLMVE GQYFPEKEDLDKDTALFLKNSISLARPPQRQAICEMVBAEDG -----CG-AVTRNFDIKVDRNMTPTVEGRVLPKLVV G5GON---RLPV--NDKQWLVGK
SIAGO2b QFK-DIPLCLDLCKNGRQNFVPMFECVLMVE GQYFPEKEDLDKDSAMFLKNSISLARPPQRQAICEMVBAEDG -----CG-AITDNFDIKVDRNMTPTVEGRVLPKLVV G5GON---PLRV--NDKQWLVGK
AtGO7  QFK-NLPLCQLTIS-RARPCYIPMELNLTICE GQKFLGKLSDDQATARLTK-MGCRPKPKERKAIIDRVMGTGLV -----SSGNTRFENLEVSREMTLTKGRILQPKLKD DARRGNP IHEKLMSESNOWLTTK
SIAGO7  LYR-NLPLCQLTIS-RSKPCYIPMELNLTICE GQKFLGKLSDDQATARLTK-MGCRPKPKERKAIIDRVMGTGLV -----TSGNHASDFKLEQVSKEMTKVYGRILQPKLKD GDRGQVRNLI-PSRHDROWNFLDS
MiAGO7a QFR-NLPLCQLTIS-RSKPCYIPMELNLTICE GQKFLGKLSDDQATARLTK-MGCRPKPKERKAIIDRVMGQPGV -----S-DNRASEFKLQVSKEMTKVYGRILQPKLKD GDDGGIRDLV-PSRHDROWNFLDS
MiAGO7b QFR-NLPLCQLTIS-RSKPCYIPMELNLTICE GQKFLGKLSDDQATARLTK-MGCRPKPKERKAIIDRVMGQPGV -----S-GNRGKFEKLVHVSREMTLNGRILQPKLKD GDDGGIRDLI-PSYDROWNFLDS
AtGO1  QHT-QLPLCQLVQNSNRPNYLPMFVCKLIVE GQRYSKRINERGIITALLK-VICORPPIREKDLTQTVQHNDY -----AKDNYAQEFGLKISTSLASVEARLPAVALKY HESGREGTCDL-PQV--GQWVMMNK
SIAGO1a QHT-QLPLCQLVQNTQRPNYLPMFVCKLIVE GQRYSKRINERGIITALLK-VICORPPIREKDLTQTVQHNDY -----SDDPYAREFGLKISTEKLASVEARLPAVALKY HDTGREKDCD-PQV--GQWVMMNK
SIAGO1b QHT-QWPLCQLVQNQQRPNYLPMFVCKLIVE GQRYSKRINERGIITALLK-VICORPPIREKDLTQTVQHNDY -----AEDFYAREFGLKISTEKLASVEARLPAVALKY HDNGREKDCD-PQV--GQWVMMNK
MiAGO1a RHT-QWPLCQLVQNQQRPNYLPMFVCKLIVE GQRYSKRINERGIITALLK-VICORPPIREKDLTQTVQHNDY -----YDKPYAREFGLKISTEKLASVEARLPAVALKY HDTGREKDCD-PQV--GQWVMMNK
MiAGO1b KHT-QWPLCQLVQNQQRPNYLPMFVCKLIVE GQRYSKRINERGIITALLK-VICORPPIREKDLTQTVQHNDY -----HEDPYAREFGLKISTEKLASVEARLPAVALKY HDTGREKDCD-PQV--GQWVMMNK
AtGO10 QHT-HLPLCQLVQNKQKASYPMEACKLIVE GQRYTKRINERGIITALLK-VICORPPIREKDLTQTVQHNDY -----DDDPYAKEFGMLNISTEKLASVEARLPAVALKY HENGTKEKDCD-PQV--GQWVMMNK
MiAGO10 QHT-HLPLCQLVQNKQKASYPMEACKLIVE GQRYTKRINERGIITALLK-VICORPPIREKDLTQTVQHNDY -----DDDPYAKEFGMLNISTEKLASVEARLPAVALKY HENGTKEKDCD-PQV--GQWVMMNK
SIAGO10a KNT-HLPLCQLVQNKQKASYPMEACKLIVE GQRYTKRINERGIITALLK-VICORPPIREKDLTQTVQHNDY -----NDDPYAKEFGMLNISTEKLASVEARLPAVALKY HETGKEDCDL-PQV--GQWVMMNK
MiAGOPNH1 RYT-HLPLCQLVQNQ--KYIPMEACKLIVE GQRYTKRINERGIITALLK-VICORPPIREKDLTQTVQHNDY -----GDEPYAREFGLKIVASKLASVEARLPAVALKY NDAGKEKEYL-PQV--GQWVMMNK
SIAGO10b QYP-HLPLCQLVQNSQKPNYLPMFVCKLIVE GQRYTKRINERGIITALLK-VICORPPIREKDLTQTVQHNDY -----KODPIAKEFGMLNISTEKLASVEARLPAVALKY HDAGKEKECH-PQL--GQWVMMNK
MiAGOMEL1 RYV-SWPLSLSQSDKPIIFPMELNLTICE GQRYSKRINERGIITALLK-EACRPPREEMECTLRITASFNDG -----FVDDLKVEFGVYKCKELVCDARTLPPVALKY SDSGKDRITIR-PQV--GQWVINNA
SIAGO5  AYP-RLPALTQQCSAKPVIIPMEICKLIVE GQRYTKKINERQVTEMLR-ATCRPPKRLNGLNQTIVSNKY -----ADDLVHEFGILGV DARLTLVEARLPAVALKY HASGKSRVD-PRV--GQWVINNA
SIAGO5  KYT-FLPALAQCSAKPVIIPMEICKLIVE GQRYTKKINERQVTEMLR-ATCRPPKRLNGLNQTIVSNKY -----NGDKFAKEFGILQVGAELACDARLTLPPVALKY HESGKREKMN-PRL--GQWVINNA
AtAGO5  KYQ-ALPALTQTCSSTRPVYIPMELNLTICE GQRYTKRINEKQVTEMLR-ATCRPPKRLNGLNQTIVSNKY -----ND-DLSKEFGMLNISTEKLASVEARLPAVALKY HDGKKEKMN-PRL--GQWVINNA
```

PAZ

A2

A2

```
940          950          960          970          980          990          1,000        1,010        1,020        1,030        1,040        1,050        1,060        1,070
SIAGO15  KFADPKSIEFWAVVNFSTGHD -----I RAFCIEMAKLGAMRGVHIHPPSF-VFEENAKHKKKPGSVRVNKMFEQL -----IPKFR -----KDPPRF
AtAGO6  MLEPRATKSWAIVNFSFPCD -----SSHISRELIISCGMRKGIIDRPFALV-EEDQYQYKAGPVRVEMKIATM -----KLFKFP -----D-PHPH
MiAGO6  SFUDDPKIDHWIIVNFSARCD -----TSHLSRELIINCGMRKGVHIERPFT-LIEEDQYSRRTSPVVRVEMKMFDDI -----TAKLFP -----E-PPQL
SIAGO6  HIFNPARIERWAVVNFNSAND -----TSHLSRELIISCGRSKGIHFERPHT-LIEEDQYRAGPVVRVEMFEEI -----IARLP -----G-HDPD
AtAGO8  ---PATVTRWAVVNFNSARCD -----PQKIIDDITRCGKMKGINVDSPHYVVFENPQFKDATGSVRYDKMFQHL -----QSLIG -----EVPKFE
AtAGO9  TIAEPTITVTRWAVVNFNSARCD -----TNTLIRDILIKGREKGINVEPFPKDYINENPQFRNAPATVRVEMFEEI -----KSKLP -----K-PPLE
SIAGO4c2 RIVPEVKIERWAVVNFNSARCD -----VRKLCMDLIRKCGKMKGIIFISPPFOHIFEENQYRNPAPVRVEMKLEEI -----KSKLP -----A-PPQF
AtGO4  E FVEPTIKRIVVNFNSARCN -----VRQVDDLIKIGGSKGIIFIASPFQ-VFEENQFRRAPPRIIVEMKFDI -----QSKLP -----G-VPOF
MiAGO4b KIVEPTIKERWAVVNFNSARCD -----IRGLVRDLIKCGGDMKGIKIDDPFD-VFEENPQLRRAPLVRVEMFDDI -----QSKLP -----G-APQF
MiAGO4a K-----IDDPF-DVFEENPQLRRAPPMVRVEMFEDI -----QSKLP -----G-APQF
SIAGO4a RIVVDPDKIERWAVVNFNSARCN -----VQGLVSDLIKCGKQKGINVEDPFD-VFEESQVRRAPLVRVEMFQV -----QSKLP -----G-APK
SIAGO4b RFFEPAPKIERWAVVNFNSARCD -----VRGLVRDLIRLGETKGISVEAPFE-VFEESQLRRAPPVVRVEMFEEI -----QSKLP -----G-APK
SIAGO4c RFFESAIVEKAVVNFNSARCD -----IGKLVCLITGLGETKGISVEAPLK-VFEESHRRAPPVGRVDMFEEI -----QSKLP -----D-APK
AtAGO2  GVTGTSIVKHWAVDIFIASERFN---KMPNDFVDNLDRCWRLQMEAPIVYK-TSR-METLSNGNATELLRSVIDEASRHG -----GARPTL
AtGO3  GVTGTSIVKHWAVDIFIASESLK---KMPGYFVNKLIIRKCLGWOMEAPIVCK-TS5-METLYDGNALTELLRSVIDEASHNHG -----GACPTL
MiAGO2a AVVEGRRVIERWALIDFSAYDRKN---KLDHRAFIGDIIRFENLGLFMNEPAAYQ-PTS-MNKFNVVDGRLQLLGVTSQASKICK -----GHL-QI
MiAGO2b AVELEGRKIERWALIDFSSSDRYN---KLDHGVFISDIIDRFVSLGILMNEPAIYH-PTS-MNQFNSVDGRLHLLQGVISRAKICK -----GHL-QI
SIAGO3  SVVEGKALQRWALIDFSKGRDLSLKLQVDFVVKIKDRCTQLSNIMDIPAVHV-LTD-MNELSVGKVLKLLVDAEAKKLQ -----GKL-QM
SIAGO2a SVVEGKALQRWALIDFSQDRKPFRLRVDFVFRKDRKLSLIMNEPAVHV-FTD-MHVLSEVGVKHLKLLVDAAAKREIN -----GKL-QM
SIAGO2b SVVEGKALQRWALIDFSKERN---WLRVDFEVIIRDRCSKLSLIMNEGPAEVH-LTD-MHLSVGVKVLKLLNFVDAAKRKIN -----GKL-QM
AtAGO7  KVYFKGTRIERWALISIGGSDQK---STIKPEINELTQCEHLGVFSLKNTLSSTFFEP-SHILNLIISLSEKLEIQRAS -----NNLQI
SIAGO7  HWFESTRIVERWALISHGGSQK---SHVPKFINQLCQREQLGIFLNKNTVLPNQFEP-LHLNNVNLSLSEKLNKHRAFSE -----NNLQI
MiAGO7a HWFEGTTRIERWALISHGPTDQK---ACIKPFINQLSQRCEQLGIFLNKNTICCPQFEP-TQVLLNNVLSLSEKLNKHHEATAS -----NNLQI
MiAGO7b HWFEGTTRIERWALISHGPTDQK---ACIKPFINQLSQRCEQLGIFLNKNTICSPQFES-TQVLLNNVLSLSEKLNKHEAL -----NNLQI
AtGO1  KVIINGGTIVNWIICINFSRNV-QD---NLARTCOELIAQMCYVSGVAFNPEVLPVPSAR -----PQVQKVLKTRYHDAMTSLKLS-Q -----GKEIDL
SIAGO1a KVIINGGTIVNWIICINFSRNV-QD---SVARGFCSEIAQMCISGVIFNPNPVLVPSAR -----PDQVRLKTRFHDAMTKLQPN -----GRELDL
SIAGO1b KVIINGGTIVANWICINFSRNV-QD---TVAHGFCSEIAQMCISGVIFNPNPVLVPSAR -----PDQVRLKTRFHDAMTKLQPL -----SKELD
MiAGO1a KVIINGGTIVHWLICINFSRTV-QD---QVARGFCYELIAQMCYISGVAFPEPEVLPVMTAR -----PEQVRLKTRVHDAMTKLPL -----GKELD
MiAGO1b KVIINGGTIVHWLICINFSRV-QD---QVARGFCYELIAQMCYISGVAFPEPEVLPVISAR -----PEQVRLKTRFHDAMTKLGS -----GKELD
AtGO10 KVIINGMTVSRWAVNFSRV-QE---NVARGFCNELIQMCYISGVAFENPEVPIIYSAR -----PDQVQKALKHYVHTSMNKT-K -----GKELEL
MiAGO10 KVIINGMTVSRWAVNFSRV-QE---SVARGFCNELIAQMCISGVAFENPDVPIIYNAR -----PEQVQKALKHYVHASMNKT-K -----GKELEL
SIAGO10a KVIINGMTVNRWAVNFSRV-QE---SVARGFCNELIQMCYISGVAFENPDVPIIYMAR -----PDQVQKALKHYVHASCNKLT-K -----GKELEL
MiAGOPNH1 KVIINGSTVNRWAVNFSRV-QE---NTEAFQCLIVQCTIRISGVAFENQPEVPIVPSAR -----PDQVQKALKHYVYFASANKL-Q -----GDELEL
SIAGO10b KVIINGSTVNRWAVNFSRV-QE---NAARGFCHQIAQMCYISGVAFENQPEVPIVPSAR -----PDQAKKALNYVYNAVNKL-G -----GKELEL
MiAGOMEL1 KVIYDGAALFKWTCINFSLSL-NI---QVASSFCKDLITMCRSKSGVDMNCPVLPVWTR5 -----SNTSSTLDDVHRACQDE -----QKPLQ
SIAGO5  KVIINPAHWYVYVTCVFSQQI-I-----PDRLVDGLHRCMISKGVTFD-APLVPFRQAR -----PDHTEFLRDIHRESMQADRLGLDCLKIHLQ -----LVLVLP
MiAGO5  KVIINGGQVFWTCVFSSTR-TR-NR---DLPFQFCEELVNMCRSKGVFNPTVPIIHPAN -----PNTLENALRDIHRKSTAEIARKGPQ-----GKKLQ
AtAGO5  KVIINGAKVTSWTCVFSSTR-I-DR---GLPQEFCKQLIGMCRSKGVFEKPPQAIPIFISCP -----PEHTEFLALDIIHKRA -----PGLQ
```

Piw\_i\_ago like



1,350 1,360 1,370 1,380 1,390 1,400 1,410 1,420 1,430 1,440 1,450 1,460 1,470

SIAGO15 QPNS-----SNIPIPGTIVVDTKIICHPLYNNFYLC AHAARVGTSRP THYHVLDEI GFSDDTVOELVHCLCYVSRCTISALISEVAPIRYARLVSAQMLEIMKTE-----

AtAGO6 QAKG-----PENVPAAGTIVVDTKIIVHPR-NYDFYMGCAHAGKIGTSRPAHYHVLDEI GFSDDTVOELVHCLCYVSRCTISALISEVAPIRYARLVSAQMLEIMKTE-----

MiAGO6 QASA-----PENVPAAGTIVVDTKIIVHPR-NYDFYMGCAHAGKIGTSRPAHYHVLDEI GFSDDTVOELVHCLCYVSRCTISALISEVAPIRYARLVSAQMLEIMKTE-----

SIAGO6 QANA-----VENVPAAGTIVVDTKIIVHPR-NYDFYMGCAHAGKIGTSRPAHYHVLDEI GFSDDTVOELVHCLCYVSRCTISALISEVAPIRYARLVSAQMLEIMKTE-----

AtAGO8 QTES-----PENVPIGTITIDSNIIICHQH-NNDFFYMGCAHAGKIGTSRPTHYHVLDEI GFSDDTVOELVHCLCYVSRCTISALISEVAPIRYARLVSAQMLEIMKTE-----

AtAGO9 QSRG-----PENVPIGTITIDSNIIICHPR-NDFYMGCAHAGKIGTSRPTHYHVLDEI GFSDDTVOELVHCLCYVSRCTISALISEVAPIRYARLVSAQMLEIMKTE-----

SIAGO4c2 QTN5-----PENVPIGTIVVDNAVCHPK-TNDFYMGCAHAGKIGTSRPTHYHVLDEI GFSADDMQLVHSLSYVYQRTTALISVVAPICYAHLAAAGVAQFIRKDEISETSSSHGGV-----

AtAGO4 QPTS-----PENVPIGTITIDNKIICHPK-NNDFFYMGCAHAGKIGTSRPTHYHVLDEI GFSADDMQLVHSLSYVYQRTTALISVVAPICYAHLAAAGVAQFIRKDEISETSSSHGGV-----

MiAGO4b QSGS-----PENVPIGTIVVDNRVCHPK-NYDFYMGCAHAGKIGTSRPTHYHVLDEI GFSADDMQLVHSLSYVYQRTTALISVVAPICYAHLAAAGVAQFIRKDEISETSSSHGGM-----

MiAGO4a QSGS-----PENVPIGTIVVDNRVCHPK-NYDFYMGCAHAGKIGTSRPTHYHVLDEI GFSADDMQLVHSLSYVYQRTTALISVVAPICYAHLAAAGVAQFIRKDEISETSSSHGGV-----

SIAGO4a QPND-----PENVPIGTITIDNKVCHPR-NYDFYMGCAHAGKIGTSRPTHYHVLDEI GFSADDMQLVHSLSYVYQRTTALISVVAPICYAHLAAAGVAQFIRKDEISETSSSHNGV-----

SIAGO4b QSGS-----PENVPIGTITIDNKVCHPR-NNDFFYMGCAHAGKIGTSRPTHYHVLDEI GFSADDMQLVHSLSYVYQRTTALISVVAPICYAHLAAAGVAQFIRKDEISETSSSHGGV-----

SIAGO4c PYGS-----ANVPIGTITIDNKVCHPR-NNDFFYMGCAHAGKIGTSRPTHYHVLDEI GFSADDMQLVHSLSYVYQRTTALISVVAPICYAHLAAAGVAQFIRKDEISETSSSHGGV-----

AtAGO2 PATN-NDGSD---KENVPSGTIVVDTKVIHPY-EYDFYLCGSHHCGIGTSKPTHYHVLDEI GFSDDTVOELVHCLCYVSRCTISALISEVAPIRYARLVSAQMLEIMKTE-----

AtAGO3 PATTSKDGRA---KENVPSGTIVVDTKVIHPY-EYDFYLCGSHHCGIGTSKPTHYHVLDEI GFSDDTVOELVHCLCYVSRCTISALISEVAPIRYARLVSAQMLEIMKTE-----

MiAGO2b PASK-RDGC---TENVPIGTIVVDTKIIVHPF-EYDFYLCGSHHCGIGTSKPTHYHVLDEI GFSDDTVOELVHCLCYVSRCTISALISEVAPIRYARLVSAQMLEIMKTE-----

MiAGO2a PESK-RDGGI---TENVPIGTIVVDTKIIVHPF-EYDFYLCGSHHCGIGTSKPTHYHVLDEI GFSDDTVOELVHCLCYVSRCTISALISEVAPIRYARLVSAQMLEIMKTE-----

SIAGO3 PKEG-----VENVPIGTIVVDTKIIVHPF-EYDFYLCGSHHCGIGTSKPTHYHVLDEI GFSDDTVOELVHCLCYVSRCTISALISEVAPIRYARLVSAQMLEIMKTE-----

SIAGO2a PEGG-----PENVPIGTIVVDTKIIVHPF-EYDFYLCGSHHCGIGTSKPTHYHVLDEI GFSDDTVOELVHCLCYVSRCTISALISEVAPIRYARLVSAQMLEIMKTE-----

SIAGO2b PREG-----VENVPIGTIVVDTKIIVHPF-EYDFYLCGSHHCGIGTSKPTHYHVLDEI GFSDDTVOELVHCLCYVSRCTISALISEVAPIRYARLVSAQMLEIMKTE-----

AtAGO7 RCDP-D-----HENVPIGTIVVDTKIIVHPF-EYDFYLCGSHHCGIGTSKPTHYHVLDEI GFSDDTVOELVHCLCYVSRCTISALISEVAPIRYARLVSAQMLEIMKTE-----

SIAGO7 PCEL-DPSTTKNTLNF---HENVPIGTIVVDTKIIVHPF-EYDFYLCGSHHCGIGTSKPTHYHVLDEI GFSDDTVOELVHCLCYVSRCTISALISEVAPIRYARLVSAQMLEIMKTE-----

MiAGO7a PYET-DPSTQIQLSN---HENVPIGTIVVDTKIIVHPF-EYDFYLCGSHHCGIGTSKPTHYHVLDEI GFSDDTVOELVHCLCYVSRCTISALISEVAPIRYARLVSAQMLEIMKTE-----

MiAGO7b PYN5-YPSSTQNQLSN---HENVPIGTIVVDTKIIVHPF-EYDFYLCGSHHCGIGTSKPTHYHVLDEI GFSDDTVOELVHCLCYVSRCTISALISEVAPIRYARLVSAQMLEIMKTE-----

AtAGO1 AQNH-NDRHS---VDRS---HENVPIGTIVVDTSKIIICHPT-EYDFYLCGSHHCGIGTSRPAHYHVLDEI GFSADDMQLVHSLSYVYQRTTALISVVAPICYAHLAAAGVAQFIRKDEISETSSSHGGV-----

SIAGO1a ANNH-RDRNA---VDRS---HENVPIGTIVVDTSKIIICHPT-EYDFYLCGSHHCGIGTSRPAHYHVLDEI GFSADDMQLVHSLSYVYQRTTALISVVAPICYAHLAAAGVAQFIRKDEISETSSSHGGV-----

SIAGO1b ANNH-RDRNA---VDRS---HENVPIGTIVVDTSKIIICHPT-EYDFYLCGSHHCGIGTSRPAHYHVLDEI GFSADDMQLVHSLSYVYQRTTALISVVAPICYAHLAAAGVAQFIRKDEISETSSSHGGV-----

MiAGO1a ANNH-RDRST---VDRS---HENVPIGTIVVDTSKIIICHPT-EYDFYLCGSHHCGIGTSRPAHYHVLDEI GFSADDMQLVHSLSYVYQRTTALISVVAPICYAHLAAAGVAQFIRKDEISETSSSHGGV-----

MiAGO1b ANNH-HDRNT---VDRS---HENVPIGTIVVDTSKIIICHPT-EYDFYLCGSHHCGIGTSRPAHYHVLDEI GFSADDMQLVHSLSYVYQRTTALISVVAPICYAHLAAAGVAQFIRKDEISETSSSHGGV-----

AtAGO1a ANNH-RDKNS---TDRS---HENVPIGTIVVDTKIICHPT-EYDFYLCGSHHCGIGTSRPAHYHVLDEI GFSADDMQLVHSLSYVYQRTTALISVVAPICYAHLAAAGVAQFIRKDEISETSSSHGGV-----

MiAGO10 ASNH-RDRS---TDRS---HENVPIGTIVVDTSKIIICHPT-EYDFYLCGSHHCGIGTSRPAHYHVLDEI GFSADDMQLVHSLSYVYQRTTALISVVAPICYAHLAAAGVAQFIRKDEISETSSSHGGV-----

SIAGO10a ANNH-KDRS---IDRS---HENVPIGTIVVDTKIICHPT-EYDFYLCGSHHCGIGTSRPAHYHVLDEI GFSADDMQLVHSLSYVYQRTTALISVVAPICYAHLAAAGVAQFIRKDEISETSSSHGGV-----

MiAGOPNH1 SSNH-KDRNS---TDRS---HENVPIGTIVVDTKIICHPT-EYDFYLCGSHHCGIGTSRPAHYHVLDEI GFSADDMQLVHSLSYVYQRTTALISVVAPICYAHLAAAGVAQFIRKDEISETSSSHGGV-----

SIAGO10b PNNH-NDRNH---TDRS---HENVPIGTIVVDTKIICHPT-EYDFYLCGSHHCGIGTSRPAHYHVLDEI GFSADDMQLVHSLSYVYQRTTALISVVAPICYAHLAAAGVAQFIRKDEISETSSSHGGV-----

MiAGOMEL1 P5NH-DDRTL---TDRS---HENVPIGTIVVDTKIICHPT-EYDFYLCGSHHCGIGTSRPAHYHVLDEI GFSADDMQLVHSLSYVYQRTTALISVVAPICYAHLAAAGVAQFIRKDEISETSSSHGGV-----

SIAGO5 PADH-RNRDL---TDRS---HENVPIGTIVVDTKIICHPT-EYDFYLCGSHHCGIGTSRPAHYHVLDEI GFSADDMQLVHSLSYVYQRTTALISVVAPICYAHLAAAGVAQFIRKDEISETSSSHGGV-----

AtAGO5 PEQH-GNRDM---TDRS---HENVPIGTIVVDTKIICHPT-EYDFYLCGSHHCGIGTSRPAHYHVLDEI GFSADDMQLVHSLSYVYQRTTALISVVAPICYAHLAAAGVAQFIRKDEISETSSSHGGV-----
