# Supplementary material for: Genome-wide identification of gene families related to miRNA biogenesis in Mangifera indica L. and their possible role during heat stress
Source: PeerJ journal article supplement (doi:10.7717/peerj.17737), 2024-07-17
Supplement: FigS6.pdf [file FigS6.pdf]

|       |               |               |                |                  |                  |                          |            |              |                |                |                       |
|-------|---------------|---------------|----------------|------------------|------------------|--------------------------|------------|--------------|----------------|----------------|-----------------------|
|       | 210           | 220           | 230            | 240              | 250              | 260                      | 270        | 280          | 290            | 300            |                       |
|       |               |               |                |                  |                  |                          |            |              | MYGSRPPP       | RRDGLMSY       | KQFI                  |
| PpSE  |               |               |                |                  |                  |                          |            |              |                |                |                       |
| SmSE  |               |               |                |                  |                  |                          |            |              |                |                |                       |
| OsSE3 | KRPR          | -----LDGR     | --SP-----      | PRGGR            | FGFEHER          | GRERSMNTSRRA             | -----      | PD           | CLDSG          | CDAPYNGQSNTRR  | KGLMTYKQFI            |
| AtSE  | KRYR          | RDDNGYDGR     | --GSPRGGYGPP   | DRRF             | GYDHGGCYDREMGGRP | GYCDERPHGRFMGRY          | -----      | QD           | WEGGRGGYGDASNS | CNPQRDGLMSY    | KQFI                  |
| AtSE2 | KRYR          | RDDNGYDGR     | --GSPRGGYGPP   | DRRF             | GYDHGGCYDREMGGRP | GYCDERPHGRFMGRY          | -----      | QD           | WEGGRGGYGDASNS | CNPQRDGLMSY    | KQFI                  |
| SISE  | KRSRRD        | -DYDGR        | --GSPRGGFGHG   | DRRY             | GYDHQGCYDREMGGRP | GYPDERHHGRFAGRS          | SSGGYRG-   | G            | DWG            | PVRGGFADSFAGCN | QREGLKSYKQFI          |
| SISE2 | KRSRRD        | -DYDGR        | --GSPRGGFGHG   | DRRY             | GYDHQGCYDREMGGRP | GYPDERHHGRFAGRS          | SSGGYRG-   | G            | DWG            | PVRGGFADSFAGCN | QREGLKSYKQFI          |
| CsSE  | KRSRRDDGGYDGR | --GSPRGGFGPP  | DRRF           | GYDYGGCYEREMGR   | PGYVDERPMGRFMGRS | SSGGYQ--                 | G          | DWD          | SNRGGHGDALNP   | CGCQREGLMTY    | KQFM                  |
| CsSE3 | KRSRRDDGGYEP  | RR--GSPRGGFGP | DRRF           | GYDYTG           | CYEREMGGRP       | GYCDERPHGRFAGRS          | SSGGYQSGP  | S            | EWD            | SSRGGYGDASNT   | GSTQREGLMSYKQFI       |
| CsSE5 | KRSRRDDGGYEP  | RR--GSPRGGFGP | DRRF           | GYDYTG           | CYEREMGGRP       | GYCDERPHGRFAGRS          | SSGGYQSGP  | S            | EWD            | SSRGGYGDASNT   | GSTQREGLMSYKQFI       |
| CsSE2 | KRSRRDDGGYEP  | RR--GSPRGGFGP | DRRF           | GYDYTG           | CYEREMGGRP       | GYCDERPHGRFAGRS          | SSGGYQSGP  | S            | EWD            | SSRGGYGDASNT   | GSTQREGLMSYKQFI       |
| CsSE1 | KRSRRDDGGYEP  | RR--GSPRGGFGP | DRRF           | GYDYTG           | CYEREMGGRP       | GYCDERPHGRFAGRS          | SSGGYQSGP  | S            | EWD            | SSRGGYGDASNT   | GSTQREGLMSYKQFI       |
| CsSE4 |               |               |                |                  |                  |                          |            |              |                |                | MSYKQFI               |
| MiSE1 | KRSRRDDGGYDGR | --GSPRGVFGPP  | DRRF           | GYDYAGCFEREMGGRP | GYCDERPHGRHISWP  | FGGYS-GHS                | DWD        | SGRSGYNEVPNT | CTVQREGLMSY    | KQFI           |                       |
| MiSE2 | KRSRRDDGGYDGR | --GSPRGGFGPP  | DRRF           | GYDYAGCYERE      | IIGGRP           | GYCDERPHGRYIGRPIGGYG-GPP | EWD        | SGRGGYSDVPNT | CSAQREGLMSY    | KQFI           |                       |
| OsSE2 | KRSRRDD       | -GYDRR        | GGRGSP-PRYGYD  | DRRY             | GYDHERC          | -----GGRGGYD             | DDRYHGRYQ  | NRA          | -----ADW       | ADSGFGASND     | --GPCITQREGLMTYKQFI   |
| ZmSE  | KRSRRDD       | -GYDRR        | GGRGSP-PRYGYD  | DRRY             | GYDHERC          | -----GGRGGYD             | DDRNQGRYL  | NRA          | -----PD        | WDSGYGAAND     | --GPCVTQREGLMTYKQFM   |
| ZmSE2 | KRSRRDD       | -GYDRR        | GGRGSP-PRYGYD  | DRRY             | GYDHERC          | -----GGRGGYD             | DDRNHGRYLN | RG           | -----PD        | WDSGYGAAND     | --GPCVTQREGLMTYKQFM   |
| OsSE1 | -----         | FD            | RRRLGPGV-GYDNP | DRRY             | CNDHGA           | -----GGRGGYD             | DERGCGRNF  | NRA          | -----PD        | WDSGRGW        | ND--GPANSRREGLMSYKQFM |
| ZmSE3 | -----         | FD            | RRRLGPGVGGGHEQ | DRRY             | CNGLGGI          | -----GGRGC               | -----      | DSRYTNRA     | -----PD        | ---SGRGGW      | NE--GSCNSRREGLMSYKQFI |
| ZmSE4 | -----         | FD            | RRRLGPGVGGGHEQ | DRRY             | CNGLGGV          | -----GGRGC               | -----      | DGOYTNRA     | -----PD        | WDSGRGGW       | NE--GPCNSRREGLMSYKQFI |

DUF3546 superfamily

|       |         |        |              |            |           |           |         |       |        |             |         |        |       |        |       |       |        |      |    |       |
|-------|---------|--------|--------------|------------|-----------|-----------|---------|-------|--------|-------------|---------|--------|-------|--------|-------|-------|--------|------|----|-------|
|       | 310     | 320    | 330          | 340        | 350       | 360       | 370     | 380   | 390    | 400         |         |        |       |        |       |       |        |      |    |       |
| PpSE  | VELEDDI | LPGEA  | ERYEYKSEY    | ITTOKRAFFE | QHKKDDDWL | -----     | REKYD   | PARLE | IVLVR  | RENENAKILSK | ELLAE   | LQAGSL |       |        |       |       |        |      |    |       |
| SmSE  |         |        | YEEYK        | AEYVSTOKR  | AYFEQHKE  | EDWL      | REKYD   | PSRL  | DSL    | MARRI       | ETAKS   | SARD   | FILLE | LQAGSL |       |       |        |      |    |       |
| OsSE3 | QKLEDDV | SPICE  | AEASRYQEYK   | TSYITSQK   | QDYFDH    | HKNEDRL   | KDMYH   | PTNLL | SVIER  | RNELCKAA    | AKNL    | ILDL   | RS    | SGTL   |       |       |        |      |    |       |
| AtSE  | QLEDDI  | LPSEAE | RRYQEYKSEY   | ITTOKRAFF  | NTHK      | EDWL      | KNKYH   | PTNLL | SVIER  | RNDLAQ      | KVAK    | DFLL   | DL    | QSGTL  |       |       |        |      |    |       |
| AtSE2 | QLEDDI  | LPSEAE | RRYQEYKSEY   | ITTOKRAFF  | NTHK      | EDWL      | KNKYH   | PTNLL | SVIER  | RNDLAQ      | KVAK    | DFLL   | DL    | QSGTL  |       |       |        |      |    |       |
| SISE  | QLEDDI  | LPAAEA | RRYQEYKACYIE | AQKRAY     | FN        | AHKDEEWL  | KDKYH   | PSNLI | SVIER  | RNELARK     | S       | AK     | DFLL  | DL     | QSGTL |       |        |      |    |       |
| SISE2 | QLEDDI  | LPAAEA | RRYQEYKACYIE | AQKRAY     | FN        | AHKDEEWL  | KDKYH   | PSNLI | SVIER  | RNELARK     | S       | AK     | DFLL  | DL     | QSGTL |       |        |      |    |       |
| CsSE  | QLEDDI  | LPAAEA | RRYQEYKSEY   | ITTOKCA    | FFD       | SHKDEEWL  | RDKYH   | PTNL  | LV     | VIERR       | NELAQ   | RTAK   | DFLL  | DL     | QSGTL |       |        |      |    |       |
| CsSE3 | QLEDDI  | LPAAEA | RRYQEYKSEY   | ISTOKR     | VFF       | DAHKDEEWL | KDKYH   | PTNL  | VAVI   | ERRN        | LARKV   | AK     | DFLL  | DL     | QSGTL |       |        |      |    |       |
| CsSE5 | QLEDDI  | LPAAEA | RRYQEYKSEY   | ISTOKR     | VFF       | DAHKDEEWL | KDKYH   | PTNL  | VAVI   | ERRN        | LARKV   | AK     | DFLL  | DL     | QSGTL |       |        |      |    |       |
| CsSE2 | QLEDDI  | LPAAEA | RRYQEYKSEY   | ISTOKR     | VFF       | DAHKDEEWY | SSFTL   | FLL   | CTLRCS | SYMCF       | VCR     | KDKYH  | PTNL  | VAVI   | ERRN  | LARKV | AK     | DFLL | DL | QSGTL |
| CsSE1 | QLEDDI  | LPAAEA | RRYQEYKSEY   | ISTOKR     | VFF       | DAHKDEEWL | KDKYH   | PTNL  | VAVI   | ERRN        | LARKV   | AK     | DFLL  | DL     | QSGTL |       |        |      |    |       |
| CsSE4 | QLEDDI  | LPAAEA | RRYQEYKSEY   | ISTOKR     | VFF       | DAHKDEEWL | KDKYH   | PTNL  | VAVI   | ERRN        | LARKV   | AK     | DFLL  | DL     | QSGTL |       |        |      |    |       |
| MiSE1 | QLEDDI  | LPAAEA | RRYQEYKSEY   | ISTOKR     | VFF       | DAHRDEEWL | KDKYH   | PTNLL | SVIER  | RNELARK     | V       | AK     | DFLL  | DL     | QSGTV |       |        |      |    |       |
| MiSE2 | QLEDDI  | LPAAEA | RRYQEYKSEY   | ISTOKR     | VFF       | DAHKDEEWL | KDKYH   | PTNLL | SVIER  | RNELARK     | V       | AK     | DFLL  | DL     | QSGTL |       |        |      |    |       |
| OsSE2 | QVLEDDI | SPAEAK | RYQEYRTEY    | ITTOKR     | AYFDL     | HKNDDRL   | KDKYH   | PTNL  | SSVI   | DRR         | NDSC    | KAT    | AK    | DF     | FD    | LQ    | NGTL   |      |    |       |
| ZmSE  | QVLEDDI | SPAEAK | RYQEYRTEY    | ITTOKR     | AYFDL     | HKNEDWL   | KDKYH   | PTNL  | LSVI   | ERRN        | ERCKV   | IA     | AK    | DF     | FD    | LQ    | NGTL   |      |    |       |
| ZmSE2 | L       | VLEDDI | SPSEAE       | RRYQEYRTEY | ITTOKR    | AYFDL     | HKNEDWL | KDKYH | PTNLL  | SVIER       | RNERCKV | IA     | AK    | DF     | FD    | LQ    | NGTL   |      |    |       |
| OsSE1 | QLEDDV  | SPDEA  | QRYEYKSEY    | ITTOKK     | AYFDL     | HKNDDWL   | KNKYH   | PTNLE | IVM    | ERRN        | ELAR    | TAN    | Q     | F      | LQ    | D     | LONGSL |      |    |       |
| ZmSE3 | QLEDDV  | SPVEA  | QRYEYKSEY    | ITTOKK     | AYFAL     | HKDEEWL   | RNKYH   | PTNLE | ENV    | VIERR       | NELAR   | TT     | AD    | DF     | FL    | QL    | QSGSL  |      |    |       |
| ZmSE4 | QLEDDV  | SPVEA  | QRYEYKSEY    | ITTOKK     | AYFDL     | HKNEDWL   | RNKYH   | PTNLE | ENV    | VIERR       | NELAR   | TT     | AN    | DF     | FL    | KL    | QSGDL  |      |    |       |

DUF3546 superfamily

DUF3546 superfamily

|       | 610     | 620     | 630        | 640      | 650      | 660      | 670      | 680     | 690     | 700     |           |
|-------|---------|---------|------------|----------|----------|----------|----------|---------|---------|---------|-----------|
| PpSE  | LGREKLD | TTANEAL | DPFVRK     | IRDEKYGW | YGCCGAKG | GCTKLFH  | GPEFVHKH | LKLNKHS | SDLVADV | VAKAREE | LYFQNYM   |
| SmSE  | L GKDKS | EASMS   | EAL EPYVRK | IRDEKYGW | YGCLATG  | CSKLFH   | GPEFVHKH | LKLNKHP | ELVNE   | SMAKLR  | RELYFQNYM |
| OsSE3 | TAKDKI  | DASADK  | VLESYMT    | KVKDDNY  | GWTYG    | CCGAKGC  | IKVFHAP  | DFVLKHL | NLKH    | PDLSK   | LTSRVQED  |
| AtSE  | AAKEKID | AAAT    | EALDPH     | VRKIR    | DEKYGW   | YGCCGAKG | GCTKLFH  | AAEFVY  | KHLKLNK | HTELV   | TELTTKV   |
| AtSE2 | AAKEKID | AAAT    | EALDPH     | VRKIR    | DEKYGW   | YGCCGAKG | GCTKLFH  | AAEFVY  | KHLKLNK | HTELV   | TELTTKV   |
| SISE  | AAKEKID | AVAAE   | EALDPY     | VRKIR    | DEKYGW   | YGCCGAKG | GCTKLFH  | AAEFVH  | KHLKLNK | HPDL    | SVDLTTK   |
| SISE2 | AAKEKID | AVAAE   | EALDPY     | VRKIR    | DEKYGW   | YGCCGAKG | GCTKLFH  | AAEFVH  | KHLKLNK | HPDL    | SVDLTTK   |
| CsSE  | TAKDKI  | EAAL    | EAFDPY     | VRKIR    | DEKYGW   | YGCCGAKG | GCTKLFH  | AAEFVH  | KHLN    | LKHPEL  | VMELTSK   |
| CsSE3 | TAKDKI  | DAAAV   | DALDPF     | VRKIR    | DEKYGW   | YGCCGAKG | GCTKLFH  | AAEFVH  | KHLKLNK | HPPEL   | VIELTSK   |
| CsSE5 | TAKDKI  | DAAAV   | DALDPF     | VRKIR    | DEKYGW   | YGCCGAKG | GCTKLFH  | AAEFVH  | KHLKLNK | HPPEL   | VIELTSK   |
| CsSE2 | TAKDKI  | DAAAV   | DALDPF     | VRKIR    | DEKYGW   | YGCCGAKG | GCTKLFH  | AAEFVH  | KHLKLNK | HPPEL   | VIELTSK   |
| CsSE1 | TAKDKI  | DAAAV   | DALDPF     | VRKIR    | DEKYGW   | YGCCGAKG | GCTKLFH  | AAEFVH  | KHLKLNK | HPPEL   | VIELTSK   |
| CsSE4 | TAKDKI  | DAAAV   | DALDPF     | VRKIR    | DEKYGW   | YGCCGAKG | GCTKLFH  | AAEFVH  | KHLKLNK | HPPEL   | VIELTSK   |
| MiSE1 | TAKDKI  | DAAAV   | DALDPF     | VRKIR    | DEKYGW   | YGCCGAKG | GCTKLFH  | AAEFVH  | KHLKLNK | HPPEL   | VMELTV    |
| MiSE2 | TAKDKI  | DAAAV   | DALDPF     | VRKIR    | DEKYGW   | YGCCGAKG | GCTKLFH  | AAEFVH  | KHLKLNK | HPPEL   | VMELTV    |
| OsSE2 | AAKDKI  | DAAAV   | EVL        | EPYVRK   | IRDEKYGW | YGCCGAKG | GCTKLFH  | AAEFVH  | KHLRLK  | HPPEL   | VLELTSK   |
| ZmSE  | TAKDKI  | DAAAA   | EVL        | EPLVRK   | IRDEKYGW | YGCCGAKG | GCTKLFH  | AAEFVH  | KHLKLNK | HPDL    | VLELTSK   |
| ZmSE2 | TAKDKI  | DAAAA   | EVL        | EPLVRK   | IRDEKYGW | YGCCGAKG | GCTKLFH  | AAEFVH  | KHLRLK  | HPDL    | VLELTSK   |
| OsSE1 | KAKDKI  | DAAAV   | EVL        | DPHVRK   | IRDEKYGW | YGCCGAKG | GCTKLFH  | AAEFVQ  | KHLKLNK | HADL    | VRELTSK   |
| ZmSE3 | KAKEKID | GAAAT   | EVLDPY     | VRKIR    | DEKYGW   | YGCCGAKG | GCTKLFH  | AAEFVQ  | KHLKLNK | HTDL    | VDLTSK    |
| ZmSE4 | KGKEKID | GAAAT   | EVLDPY     | VRKIR    | DEKYGW   | YGCCGAKG | GCTKLFH  | AAEFVQ  | KHLKLNK | HADL    | VDLTSK    |

### ARS2 superfamily

|       | 710     | 720  | 730    | 740    | 750   | 760   | 770  | 780   | 790  | 800    |       |
|-------|---------|------|--------|--------|-------|-------|------|-------|------|--------|-------|
| PpSE  | RGLRPGL | SGPI | GGPGNR | RAGPDW | PPSDH | PSRDR | GRFG | PRNCD | RYDQ | GPAREE | QRFER |
| SmSE  | ---     | ---  | ---    | ---    | ---   | ---   | ---  | ---   | ---  | ---    | ---   |
| OsSE3 | ---     | ---  | ---    | ---    | ---   | ---   | ---  | ---   | ---  | ---    | ---   |
| AtSE  | ---     | ---  | ---    | ---    | ---   | ---   | ---  | ---   | ---  | ---    | ---   |
| AtSE2 | ---     | ---  | ---    | ---    | ---   | ---   | ---  | ---   | ---  | ---    | ---   |
| SISE  | ---     | ---  | ---    | ---    | ---   | ---   | ---  | ---   | ---  | ---    | ---   |
| SISE2 | ---     | ---  | ---    | ---    | ---   | ---   | ---  | ---   | ---  | ---    | ---   |
| CsSE  | ---     | ---  | ---    | ---    | ---   | ---   | ---  | ---   | ---  | ---    | ---   |
| CsSE3 | ---     | ---  | ---    | ---    | ---   | ---   | ---  | ---   | ---  | ---    | ---   |
| CsSE5 | ---     | ---  | ---    | ---    | ---   | ---   | ---  | ---   | ---  | ---    | ---   |
| CsSE2 | ---     | ---  | ---    | ---    | ---   | ---   | ---  | ---   | ---  | ---    | ---   |
| CsSE1 | ---     | ---  | ---    | ---    | ---   | ---   | ---  | ---   | ---  | ---    | ---   |
| CsSE4 | ---     | ---  | ---    | ---    | ---   | ---   | ---  | ---   | ---  | ---    | ---   |
| MiSE1 | ---     | ---  | ---    | ---    | ---   | ---   | ---  | ---   | ---  | ---    | ---   |
| MiSE2 | ---     | ---  | ---    | ---    | ---   | ---   | ---  | ---   | ---  | ---    | ---   |
| OsSE2 | ---     | ---  | ---    | ---    | ---   | ---   | ---  | ---   | ---  | ---    | ---   |
| ZmSE  | ---     | ---  | ---    | ---    | ---   | ---   | ---  | ---   | ---  | ---    | ---   |
| ZmSE2 | ---     | ---  | ---    | ---    | ---   | ---   | ---  | ---   | ---  | ---    | ---   |
| OsSE1 | ---     | ---  | ---    | ---    | ---   | ---   | ---  | ---   | ---  | ---    | ---   |
| ZmSE3 | ---     | ---  | ---    | ---    | ---   | ---   | ---  | ---   | ---  | ---    | ---   |
| ZmSE4 | ---     | ---  | ---    | ---    | ---   | ---   | ---  | ---   | ---  | ---    | ---   |

### ARS2 superfamily

### ARS2 superfamily

### ARS2 superfamily

|       | 810 | 820  | 830  | 840 | 850    | 860   | 870  | 880 | 890 | 900 |                         |                           |                           |      |      |     |     |      |                           |       |                           |                           |                           |     |      |      |     |     |     |     |     |     |    |     |   |     |     |     |    |   |     |     |     |     |     |     |     |   |   |   |    |     |     |    |   |   |   |   |   |   |   |
|-------|-----|------|------|-----|--------|-------|------|-----|-----|-----|-------------------------|---------------------------|---------------------------|------|------|-----|-----|------|---------------------------|-------|---------------------------|---------------------------|---------------------------|-----|------|------|-----|-----|-----|-----|-----|-----|----|-----|---|-----|-----|-----|----|---|-----|-----|-----|-----|-----|-----|-----|---|---|---|----|-----|-----|----|---|---|---|---|---|---|---|
| PpSE  | GPM | EPP  | MFDH | FNG | PPVRGL | PGGL  | FVP  | DM  | PGP | PQ  | VLMPVPGAGPLGPFVPAPPEI   | AMR                       | FLRE                      | GP   | G    | --- | PFR | MCG  | FDAGYQE                   | EENGG | PRG                       | GKR                       | GAP                       | GPM | MEGG |      |     |     |     |     |     |     |    |     |   |     |     |     |    |   |     |     |     |     |     |     |     |   |   |   |    |     |     |    |   |   |   |   |   |   |   |
| SmSE  | AS  | EQP  | MFD  | PF  | GGTNI  | H---  | GGAF | GS  | ET  | -P  | PPVLMPVPGAGPLGPFVPAPPDV | IMR                       | MR                        | REH  | GG   | GPQ | PF  | HPAP | FDP                       | S---  | ---                       | FDGGDR                    | GR                        | --- | KGR  |      |     |     |     |     |     |     |    |     |   |     |     |     |    |   |     |     |     |     |     |     |     |   |   |   |    |     |     |    |   |   |   |   |   |   |   |
| OsSE3 | PTP | SEL  | TPGA | F   | GGQGS  | F---  | ---  | VEM | PT  | -   | PPVLI                   | PVPGAGPLGPFVPAPPEV        | VM                        | QMMR | PVMP | --- | --- | ---  | ---                       | ---   | ---                       | ---                       | ---                       | --- | ---  | ---  |     |     |     |     |     |     |    |     |   |     |     |     |    |   |     |     |     |     |     |     |     |   |   |   |    |     |     |    |   |   |   |   |   |   |   |
| AtSE  | GNP | CE   | VG   | YDA | F      | GGQGV | --   | HVP | PFL | SD  | INP                     | PPMLMPVPGAGPLGPFVPAPPEVAM | QMF                       | RD   | PS   | GNP | PF  | EGS  | GR                        | ---   | ---                       | ---                       | ---                       | GG  | ---  | -P   |     |     |     |     |     |     |    |     |   |     |     |     |    |   |     |     |     |     |     |     |     |   |   |   |    |     |     |    |   |   |   |   |   |   |   |
| AtSE2 | GNP | CE   | VG   | YDA | F      | GGQGV | --   | HVP | PFL | SD  | INP                     | PPMLMPVPGAGPLGPFVPAPPEVAM | QMF                       | RD   | PS   | GNP | PF  | EGS  | GR                        | ---   | ---                       | ---                       | ---                       | GG  | ---  | -P   |     |     |     |     |     |     |    |     |   |     |     |     |    |   |     |     |     |     |     |     |     |   |   |   |    |     |     |    |   |   |   |   |   |   |   |
| SISE  | GNP | DE   | EM   | FDT | F      | GGQGI | P--  | VA- | SFP | SD  | MAP                     | PPVLMPVPGAGPLGPFVPAPPEVAM | RMM                       | RE   | QGG  | P-  | TP  | FE   | GG                        | -R    | ---                       | ---                       | ---                       | NGR | SGP  | ---- | A   |     |     |     |     |     |    |     |   |     |     |     |    |   |     |     |     |     |     |     |     |   |   |   |    |     |     |    |   |   |   |   |   |   |   |
| SISE2 | GNP | DE   | EM   | FDT | F      | GGQGI | P--  | VA- | SFP | SD  | MAP                     | PPVLMPVPGAGPLGPFVPAPPEVAM | RMM                       | RE   | QGG  | P-  | TP  | FE   | GG                        | -R    | ---                       | ---                       | ---                       | NGR | SGP  | ---- | A   |     |     |     |     |     |    |     |   |     |     |     |    |   |     |     |     |     |     |     |     |   |   |   |    |     |     |    |   |   |   |   |   |   |   |
| CsSE  | GN  | IDDP | MFD  | S   | F      | GGQGR | H--  | VA- | PF  | ASE | ET                      | -P                        | PPVLMPVPGAGPLGPFVPAPPEVAM | RML  | RE   | QGG | P-  | PF   | EG                        | GR    | ---                       | ---                       | ---                       | NGR | PGP  | QL   | GGS |     |     |     |     |     |    |     |   |     |     |     |    |   |     |     |     |     |     |     |     |   |   |   |    |     |     |    |   |   |   |   |   |   |   |
| CsSE3 | ANR | DES  | MFD  | T   | F      | GGQGI | R--  | VAP | PF  | PS  | DI                      | PP                        | PPVLMPVPGAGPLGPFVPAPPEVAM | QMI  | RD   | QGG | P-  | PF   | EG                        | GR    | ---                       | ---                       | ---                       | HGR | PGP  | QL   | SGP |     |     |     |     |     |    |     |   |     |     |     |    |   |     |     |     |     |     |     |     |   |   |   |    |     |     |    |   |   |   |   |   |   |   |
| CsSE5 | ANR | DES  | MFD  | T   | F      | GGQGI | R--  | VAP | PF  | PS  | DI                      | PP                        | PPVLMPVPGAGPLGPFVPAPPEVAM | QMI  | RD   | QGG | P-  | PF   | EG                        | GR    | ---                       | ---                       | ---                       | HGR | PGP  | QL   | SGP |     |     |     |     |     |    |     |   |     |     |     |    |   |     |     |     |     |     |     |     |   |   |   |    |     |     |    |   |   |   |   |   |   |   |
| CsSE2 | ANR | DES  | MFD  | T   | F      | GGQGI | R--  | VAP | PF  | PS  | DI                      | PP                        | PPVLMPVPGAGPLGPFVPAPPEVAM | QMI  | RD   | QGG | P-  | PF   | EG                        | GR    | ---                       | ---                       | ---                       | HGR | PGP  | QL   | SGP |     |     |     |     |     |    |     |   |     |     |     |    |   |     |     |     |     |     |     |     |   |   |   |    |     |     |    |   |   |   |   |   |   |   |
| CsSE1 | ANR | DES  | MFD  | T   | F      | GGQGI | R--  | VAP | PF  | PS  | DI                      | PP                        | PPVLMPVPGAGPLGPFVPAPPEVAM | QMI  | RD   | QGG | P-  | PF   | EG                        | GR    | ---                       | ---                       | ---                       | HGR | PGP  | QL   | SGP |     |     |     |     |     |    |     |   |     |     |     |    |   |     |     |     |     |     |     |     |   |   |   |    |     |     |    |   |   |   |   |   |   |   |
| CsSE4 | ANR | DES  | MFD  | T   | F      | GGQGI | R--  | VAP | PF  | PS  | DI                      | PP                        | PPVLMPVPGAGPLGPFVPAPPEVAM | QMI  | RD   | QGG | P-  | PF   | EG                        | GR    | ---                       | ---                       | ---                       | HGR | PGP  | QL   | SGP |     |     |     |     |     |    |     |   |     |     |     |    |   |     |     |     |     |     |     |     |   |   |   |    |     |     |    |   |   |   |   |   |   |   |
| MiSE1 | ASH | DES  | V    | F   | E      | A     | F    | GG  | -G  | I   | R--                     | VG                        | P                         | F    | S    | D   | I   | AP   | PPVLMPVPGAGPLGPFVPAPPEVAM | QMF   | RE                        | QGG                       | P-                        | PF  | EG   | GR   | --- | NGR | PGP | QL  | SGP |     |    |     |   |     |     |     |    |   |     |     |     |     |     |     |     |   |   |   |    |     |     |    |   |   |   |   |   |   |   |
| MiSE2 | VNH | DE   | P    | I   | F      | D     | A    | F   | GG  | -G  | I                       | R--                       | VG                        | P    | F    | A   | S   | D    | I                         | PP    | PPVLMPVPGAGPLGPFVPAPPEVAM | R                         | F                         | RE  | QGG  | P-   | PF  | EG  | GR  | --- | NGR | PGP | QL | GGP |   |     |     |     |    |   |     |     |     |     |     |     |     |   |   |   |    |     |     |    |   |   |   |   |   |   |   |
| OsSE2 | DG  | ADD  | Q    | M   | F      | D     | A    | F   | R   | G   | R                       | P                         | N---                      | AP   | F    | V   | A   | E    | L                         | PP    | PPILMPVPGAGPLGPFVPAPPEI   | AM                        | H                         | M   | L    | R    | E   | Q   | G   | P   | P-  | PF  | EG | P   | N | G   | P   | H   | A  | N | --- | P   | --- | --- | G   | V   | L   | G | P | M | M  | G   | G   | P  |   |   |   |   |   |   |   |
| ZmSE  | DG  | DD   | Q    | M   | F      | D     | A    | F   | R   | G   | R                       | P                         | N---                      | AP   | F    | V   | A   | E    | L                         | PP    | PPILMPVPGAGPLGPFVPAPPEI   | AM                        | H                         | M   | L    | R    | E   | Q   | G   | P   | P-  | PF  | EG | P   | N | G   | P   | H   | A  | N | --- | P   | --- | --- | G   | M   | L   | G | P | M | M  | G   | G   | P  |   |   |   |   |   |   |   |
| ZmSE2 | DG  | DD   | Q    | M   | F      | D     | A    | F   | R   | G   | R                       | P                         | N---                      | AP   | F    | V   | A   | E    | L                         | PP    | PPILMPVPGAGPLGPFVPAPPEI   | AM                        | H                         | M   | L    | R    | E   | Q   | G   | P   | P-  | PF  | EG | P   | N | G   | P   | H   | A  | N | --- | P   | --- | --- | G   | M   | L   | G | P | M | L  | G   | G   | S  |   |   |   |   |   |   |   |
| OsSE1 | DN  | P    | DD   | -   | AY     | D     | S    | Y   | C   | D   | P                       | V                         | M                         | H--- | GA   | F   | P   | P    | D                         | I     | PP                        | PPVLMPVPGAGPLGPFIPAPPEVAM | RMM                       | RD  | QGG  | P-   | PF  | EG  | P   | T   | G   | P   | R  | P   | R | --- | --- | --- | RP | G | R   | --- | --- | --- | GG  | L   | P   | M | G | G | P  |     |     |    |   |   |   |   |   |   |   |
| ZmSE3 | EN  | P    | DD   | P   | V      | Y     | D    | S   | F   | C   | D                       | P                         | T                         | M    | H--- | GA  | F   | P    | P                         | D     | I                         | PP                        | PPVLMPVPGAGPLGPFIPAPPEVAM | H   | M    | L    | R   | D   | Q   | G   | A   | P-  | PF | EG  | P | S   | G   | P   | H  | P | R   | --- | --- | --- | K   | A   | G   | R | G | S | GG | G   | P   | P  | M | R | G | P |   |   |   |
| ZmSE4 | EN  | P    | DD   | P   | I      | Y     | D    | S   | F   | C   | D                       | P                         | A                         | M    | H--- | GA  | F   | P    | P                         | D     | I                         | PP                        | PPVLMPVPGAGPLGPFIPAPPEVAM | H   | M    | L    | R   | D   | Q   | G   | A   | P-  | PF | EG  | P | I   | E   | P   | T  | G | P   | H   | P   | R   | --- | --- | --- | K | A | G | T  | --- | --- | GG | G | P | S | M | R | G | P |

ARS2 superfamily
