# Supplementary material for: Genome-wide identification of gene families related to miRNA biogenesis in Mangifera indica L. and their possible role during heat stress
Source: PeerJ journal article supplement (doi:10.7717/peerj.17737), 2024-07-17
Supplement: FigS7.pdf [file FigS7.pdf]

AtHEN1  
MiHEN1  
SIHEN1

1 10 20 30 40 50 60 70

ME T E G P S AV S VR K T S L T P K A I I F Q K F G K E A H Y T V D E V P - A A Q H G C P G L A I P H K G P C L Y R C S L Q L P D F S V V S E  
M E N G K V P A S G P K K L P F T P K A I I H Q K F G T K A C Y K V E E V Q E V V Q N G C P G L V I P Q R G P C L Y R C S L Q L P E F S V V S E

Dicer\_dimer

AtHEN1  
MiHEN1  
SIHEN1

80 90 100 110 120 130 140

I C K K K K D A E Q S A A E K A I E K - - - - - R D G D L Y  
A F R R K K D A E Q S A A E K A I Q Q L G I Q P K E V N L T V E Q A W D E L V G R L S Y L F S I E F L P A I H P L S G H F R A A L V R E G H L N

Dicer\_dimer

AtHEN1  
MiHEN1  
SIHEN1

220 230 240 250 260 270 280

I Q Q S D S A N S I C F Q G I Y I P C S L E K A V Q S V T L D V S S T R Y Y L D V I A Q K L G L T D G N K V L V S R A I G K T S S E M R L Y F A  
K N E P N S P E S I S F E A I R V P S S A E K T V E P V I L N A S S G N Y Y L D V I A K E L G V K D A S K V L I S R T I G K A S S E T R L Y F C

Hen1\_Lam\_C

AtHEN1  
MiHEN1  
SIHEN1

290 300 310 320 330 340 350 360

A P K S F I L D L A S D L P N V K G V A N F E G L L N P R A S Y F I G Q E I Y G D A V L A S I G Y T W K S K D L F H E D I T L K S Y Y R V L I N  
A P E S T T I I G S S S E L - Y M K Q A S S F K G Y V N T I A T Y L S G Q E I C G D A I L A S V G Y T W K S T D L F Y E D L S L R A Y Y R L L A N

Hen1\_Lam\_C

AtHEN1  
MiHEN1  
SIHEN1

370 380 390 400 410 420 430

L M P T G V Y K L S R D A I L M A E L P V A F T S K T T W R G S F P R E I L S M F C R Q H W L S E P V F I P L A A S S E S T R I H Q K F V V P E  
K I P S G I Y K L S R E A I L A A E L P T A F T T R S N W R G S F P R D I L C T F C R Q H R L S E P V F S S D S I E P L P D L P G R K R - L R D

dsRBD2

AtHEN1  
MiHEN1  
SIHEN1

440 450 460 470 480 490 500

S A E Q E T E C T E G S G - - - - - N L T S G Q E M I R C E V K L F S K C Q D L I L E C S P K E L H K K E S D S L Q N A S L K V V S W L N A Y L  
T S S G E N E T N E G G L A A T A V A Q E G C N L V Y R C T V K I Y S K C Q E L I L L C S P K E S Y K K Q I D A M H S T A L K V L S W L D R F L

dsRBD2

AtHEN1  
 MiHEN1  
 SiHEN1

650 660 670 680 690 700 710 720

PQELILAVADDTARTRSLLSSEACCLEYSITLLSVTEPPEDRMEQALFSPPLSKQRVEYAVQHIKEPTRADRD  
 AKEIVLAVAHDSANIISLLSSGTCCLMKCEVTLLRVTVPLEDRMEQALFSPPLSKQRVEYAVQHIKE-----

**bacter\_Hen1**

AtHEN1  
 MiHEN1  
 SiHEN1

730 740 750 760 770 780 790

TRITVIDQLRDVLRQSVELRGAIVQPFSGSFVSNLFTRWGDLDISVD-----  
 -----SCATTLVDFGCGSGSLLDSDLIDYPTAL-EKIVGVDLSQKSLSRAAKILHSKLNSKLDPAVS YTG I  
 -----SCAASLVDFGCGSGSLLESLLAYQTSL-EKIAGVDISQRALARAAKILHSKLNGNI EAEQPIN S I

**bacter\_Hen1**

AtHEN1  
 MiHEN1  
 SiHEN1

800 810 820 830 840 850 860

-----LFSGSSILFTG-----KKQKQTL L L G H L L R - A L - - - - R A S G L W Y K L Q F V I H A R V P I  
 KSAVLYDGSITVFD SRLCGFDIGTCLEVIEHME E E D A S L F G S I V L S C F R P R I L I V S T P N Y E Y N V I L Q K S S L T  
 KSAI LYDGSILS C D S R L C G Y D I A T C L E V I E H M E E Q D A C L F G D I V L R S F C P Q I L I V S T P N Y E Y N V I L Q K S T P Q

**bacter\_Hen1**

AtHEN1  
 MiHEN1  
 SiHEN1

870 880 890 900 910 920 930

LKVVSG---HQRI SC DIS - IDNLDGLLKS RFLFWI SEIDGRFRDLVLLVK EWAKAHNINDSKTGT FNS YSL S  
 SQEGDPDDKTESQPLKFRNHDHKFEWTR EQFN RWASELAA RHNY SVEFSGVGG-----SAGTEPGFA-S  
 YQEDDPDEKSQQQLCKFRNHDHKFEWTRQQFCWASELALRHNYD VV FSGVGG-----EANKEPGFA-S

**bacter\_Hen1**
