# Supplementary material for: Genome-wide identification of gene families related to miRNA biogenesis in Mangifera indica L. and their possible role during heat stress
Source: PeerJ journal article supplement (doi:10.7717/peerj.17737), 2024-07-17
Supplement: FigS9.pdf [file FigS9.pdf]

|           |   |           |          |          |          |            |            |                  |              |
|-----------|---|-----------|----------|----------|----------|------------|------------|------------------|--------------|
|           | 1 | 10        | 20       | 30       | 40       | 50         | 60         | 70               |              |
| MiHSP90.5 |   | MADAE     | ETFAFQAE | INQLLSLI | INTFY    | NKEIFLRELI | SNSSD      | -----            | AL           |
| MiHSP90.3 |   | MAAET     | ETFAFQAE | INQLLSLI | INTFY    | NKEIFLRELI | SNASD      | -----            | AL           |
| MiHSP90.4 |   | MAAET     | ETFAFQAE | INQLLSLI | INTFY    | NKEIFLRELI | SNCS       | -----            | AL           |
| AtHSP90.2 |   | MADAE     | ETFAFQAE | INQLLSLI | INTFY    | NKEIFLRELI | SNSSD      | VRSLSLSTLLYTCVSR | IDLADGSVDLGL |
| SIHSP90.2 |   | MSDV      | ETFAFQAE | INQLLSLI | INTFY    | NKEIFLRELI | SNSSD      | -----            | AL           |
| MiHSP90.2 |   | MAEAHMADV | ETFAFQAE | INQLLSLI | INTFY    | NKEIFLRELI | SNSSD      | -----            | AL           |
| SIHSP90.1 |   | MADVQMAEA | ETFAFQAE | INQLLSLI | INTFY    | NKEIFLRELI | SNSSD      | -----            | AL           |
| MiHSP90.1 |   | MADA      | AE       | ETFAFQAE | INQLLSLI | INTFY      | NKEIFLRELI | SNSSD            | -----        |
| AtHSP90.1 |   | MADVQMAEA | ETFAFQAE | INQLLSLI | INTFY    | NKEIFLRELI | SNSSD      | -----            | AL           |

HATPase\_Hsp90-like
HATPase\_Hsp90-like

|           |                 |         |            |                                    |             |     |     |     |
|-----------|-----------------|---------|------------|------------------------------------|-------------|-----|-----|-----|
|           | 80              | 90      | 100        | 110                                | 120         | 130 | 140 | 150 |
| MiHSP90.5 | DKIRFESLTDKSKLD | AQPELFI | RLVDPKANK  | TLSDSGVGMTKADLVNNLGTIARSGTKEFMEAL  | QAGADVSMIGQ |     |     |     |
| MiHSP90.3 | DKIRFESLTDKSKLD | AQPELFI | HIVDPKANN  | TLSDSGIGMTKADLVNNLGTIARSGTKEFMEAL  | AAGADVSMIGQ |     |     |     |
| MiHSP90.4 | DKIRFESLTDKSKLD | AQPELFI | HIVDPKANN  | TLSDSGIGMTKADLVNNLGTIARSGTKEFMEAL  | AAGADVSMIGQ |     |     |     |
| AtHSP90.2 | DKIRFESLTDKSKLD | GQPELFI | HIIIPDKTNN | TLTIDSGIGMTKADLVNNLGTIARSGTKEFMEAL | AAGADVSMIGQ |     |     |     |
| SIHSP90.2 | DKIRFESLTDKSKLD | GQPELFI | HIIIPDKANN | TLTIDSGIGMTKADLVNNLGTIARSGTKEFMEAL | AAGADVSMIGQ |     |     |     |
| MiHSP90.2 | DKIRYESLTDKSKLD | AQPELFI | RLVDPKANK  | SLSDSGVGMTKADLVNNLGTIARSGTKEFMEAL  | QAGADVSMIGQ |     |     |     |
| SIHSP90.1 | DKIRFESLTDKSKLD | AQPELFI | RLVDPKANK  | TLSDSGVGMTKADLVNNLGTIARSGTKEFMEAL  | QAGADVSMIGQ |     |     |     |
| MiHSP90.1 | DKIRFESLTDKTKLD | AQPELFI | RLVDPKANK  | TLSDSGIGMTKADLVNNLGTIARSGTKEFMEAL  | QAGADVSMIGQ |     |     |     |
| AtHSP90.1 | DKIRFESLTDKSKLD | GQPELFI | RLVDPKSNK  | TLSDSGIGMTKADLVNNLGTIARSGTKEFMEAL  | QAGADVSMIGQ |     |     |     |

HATPase\_Hsp90-like

|           |                                             |                                    |     |     |     |     |     |     |
|-----------|---------------------------------------------|------------------------------------|-----|-----|-----|-----|-----|-----|
|           | 160                                         | 170                                | 180 | 190 | 200 | 210 | 220 | 230 |
| MiHSP90.5 | FGVGFYSAYLVAEKVIVTTKHNDDEQYIWESQAGGSFTVTRD  | ISGEPLGRGTKMTLFLKEDQLEYLEERKIKDL   | --- |     |     |     |     |     |
| MiHSP90.3 | FGVGFYSAYLVAEKVIVTSKHNDDEQYVWESQAGGSFTVTRDT | SGEPLGRGTKITLHLKEDQLEYLEERRLKDLIKK |     |     |     |     |     |     |
| MiHSP90.4 | FGVGFYSAYLVAEKVIVTAKHNDDEQYVWESQAGGSFTVTRDT | SGEPLGRGTKITLHLKEDQLEYLEERRLKDLIKK |     |     |     |     |     |     |
| AtHSP90.2 | FGVGFYSAYLVADKVVVTTKHNDDEQYVWESQAGGSFTVTRDT | SGEPLGRGTKMVLFLKEDQLEYLEERRLKDLVKK |     |     |     |     |     |     |
| SIHSP90.2 | FGVGFYSAYLVAEKVVVTTKHNDDEQYVWESQAGGSFTVTRDT | SGENLGRGTKMVLFLKEDQLEYLEERRLKDLIKK |     |     |     |     |     |     |
| MiHSP90.2 | FGVGFYSAYLVAEKVIVTTKHNDDEQYIWESQAGGSFTVTRDV | NGEPLGRGTKITLFLKEDQLEYLEERKLDLVKK  |     |     |     |     |     |     |
| SIHSP90.1 | FGVGFYSAYLVAEKVIVTTKHNDDEQYVWESQAGGSFTVTRDV | SGEQLGRGTKITLFLKEDQLEYLEERRIKDLVKK |     |     |     |     |     |     |
| MiHSP90.1 | FGVGFYSAYLVAEKVVVTTKHNDDEQYIWESQAGGSFTVRRDV | NGEPLGRGTKMTLFLKEDQLEYLEERRIKDLVKK |     |     |     |     |     |     |
| AtHSP90.1 | FGVGFYSAYLVAEKVVVTTKHNDDEQYVWESQAGGSFTVTRDV | DGEPLGRGTKITLFLKDDQLEYLEERRLKDLVKK |     |     |     |     |     |     |

HSP90 Superfamily

|           |                    |             |             |              |                 |                  |                |
|-----------|--------------------|-------------|-------------|--------------|-----------------|------------------|----------------|
|           | 240                | 250         | 260         | 270          | 280             | 290              | 300            |
| MiHSP90.5 | -----              |             |             |              |                 |                  |                |
| MiHSP90.3 | HSEFISYPIISLWIEKTT | EKEISDDEDEE | E-EKKKDEEGK | VEDVDEEKEKEE | EKKKKKIKEVSHEWS | LVNKQKPIWMRKPE   |                |
| MiHSP90.4 | HSEFISYPIISLWT     | EKTT        | EKEISDDEDEE | E-EKKKDEEGK  | VEDVDEEKEKEE    | EKKKKKIKEVSHEWS  | LVNKQKPIWMRKPE |
| AtHSP90.2 | HSEFISYPIISLWIEKTI | EKEISDDEEEE | E-EKKKDEEGK | VEEVDEEKEKEE | EKKKKKIKEVSHEWD | LVNKQKPIWMRKPE   |                |
| SIHSP90.2 | HSEFISYPIISLWV     | EKT         | EKEISDDEEEE | E-EKKKDEEGK  | VEEVDEEKEKEE    | EKKKKKVEVSNEWS   | LVNKQKPIWMRKPE |
| MiHSP90.2 | HSEFISYPIIYLWT     | EKTT        | EKEVSDDDEDE | -ETKKKEEGD   | VEEVDEEKEKKG    | -KPKKKVKEVTHEWQ  | LINKQKPIWLRKPE |
| SIHSP90.1 | HSEFISYPIIYLWT     | EKTT        | EKEISDDED   | -DEPKKDEEGA  | VEEVDEEKEKEE    | EKKKKKIKEVSHEWQ  | LINKQKPIWLRKPE |
| MiHSP90.1 | HSEFISYPIIYLWT     | EKTT        | EKEISDDED   | -DEPKKKEEGA  | VEEVDEEKEE      | -KSKKKKIKEVSHEWQ | LINKQKPIWLRKPE |
| AtHSP90.1 | HSEFISYPIIYLWT     | EKTT        | EKEISDDEDE  | DEPKKENEGE   | VEEVDEEKEKD     | GKPKKKKIKEVSHEWE | LINKQKPIWLRKPE |

HSP90 Superfamily

|           |                                                                                                                                                           |     |     |     |     |     |     |     |
|-----------|-----------------------------------------------------------------------------------------------------------------------------------------------------------|-----|-----|-----|-----|-----|-----|-----|
|           | 310                                                                                                                                                       | 320 | 330 | 340 | 350 | 360 | 370 | 380 |
| MiHSP90.5 | - - - - - S L T N D W E E H L A V K H F S V E G Q L E F K A I L F V P K R A P F D L F D T R K K M N N I K L Y V R R V F I M D N C E E L I P               |     |     |     |     |     |     |     |
| MiHSP90.3 | E I T K E E Y A A F Y K S L T N D W E E H L A V K H F S V E G Q L E F K A I L F V P K R A P F D L F D T R K K P N N I K L Y V R R V F I M D N C E E L I P |     |     |     |     |     |     |     |
| MiHSP90.4 | E I T K E E Y A A F Y K S L T N D W E E H L A V K H F S V E G Q L E F K A I L F V P K R A P F D L F D T R K K L N N I K L Y V R R V F I M D N C E E L I P |     |     |     |     |     |     |     |
| AtHSP90.2 | E I N K E E Y A A F Y K S L S N D W E E H L A V K H F S V E G Q L E F K A I L F V P K R A P F D L F D T K K K P N N I K L Y V R R V F I M D N C E D I I P |     |     |     |     |     |     |     |
| SIHSP90.2 | E I T K E E Y A A F Y K S L T N D W E E H L A V K H F S V E G Q L E F K A V L F V P K R A P F D L F D T K K K P N N I K L Y V R R V F I M D N C D E L I P |     |     |     |     |     |     |     |
| MiHSP90.2 | E I T K E E Y S S F Y K S L T N D W E D H L A V K H F S V E G Q L E F K A I L F V P K R A P F D L F D T R K K M N N I K L Y V R R V F I M D N C E E L I P |     |     |     |     |     |     |     |
| SIHSP90.1 | E I T K E E Y A S F Y K S L T N D W E D H L A V K H F S V E G Q L E F K A I L F V P K R A P F D L F D S R K K M N N I K L Y V R R V F I M D N C E E L M P |     |     |     |     |     |     |     |
| MiHSP90.1 | E I T K E E Y A A F Y K S L T N D W E E H L A V K H F S I E G Q L E F K A I L F V P K R A P F D L F D T R K K M N N I K L Y V R R V F I M D N C E E L I P |     |     |     |     |     |     |     |
| AtHSP90.1 | E I T K E E Y A A F Y K S L T N D W E D H L A V K H F S V E G Q L E F K A I L F V P K R A P F D L F D T R K K L N N I K L Y V R R V F I M D N C E E L I P |     |     |     |     |     |     |     |

### HSP90 Superfamily

|           |                                                                                                                                                           |     |     |     |     |     |     |     |
|-----------|-----------------------------------------------------------------------------------------------------------------------------------------------------------|-----|-----|-----|-----|-----|-----|-----|
|           | 390                                                                                                                                                       | 400 | 410 | 420 | 430 | 440 | 450 | 460 |
| MiHSP90.5 | E Y L G F V K G V V D S D D L P L N I S R E T L Q Q N K I L K V I R K N L V K K C I E M F N E I A E N K E D Y N K F Y E A F S K N L K L G I H E D S Q N R |     |     |     |     |     |     |     |
| MiHSP90.3 | E Y L S F V K G I V D S E D L P L N I S R E T L Q Q N K I L K V I R K N L V K K C I E L F F E I A E N K E D Y N K F Y E A F S K N L K L G I H E D S T N K |     |     |     |     |     |     |     |
| MiHSP90.4 | E Y L S F V K G I V D S E D L P L N I S R E T L Q Q N K I L K V I R K N L V K K C I E L F F E I A E N K E D Y N K F Y E A F S K N L K L G I H E D S T N K |     |     |     |     |     |     |     |
| AtHSP90.2 | E Y L G F V K G I V D S E D L P L N I S R E T L Q Q N K I L K V I R K N L V K K C L E L F F E I A E N K E D Y N K F Y E A F S K N L K L G I H E D S Q N R |     |     |     |     |     |     |     |
| SIHSP90.2 | E Y L S F V K G I V D S E D L P L N I S R E T L Q Q N K I L K V I R K N L V K K C V E L F F E I A E N K E D Y N K F Y E A F S K N L K L G I H E D S Q N R |     |     |     |     |     |     |     |
| MiHSP90.2 | E Y L S F V K G V V D S D D L P L N I S R E M L Q Q N K I L K V I R K N L V K K C I E M F N E I A E N K E D Y N K F Y E A F S K N L K L G I H E D S Q N R |     |     |     |     |     |     |     |
| SIHSP90.1 | E Y L G F V K G V V D S D D L P L N I S R E M L Q Q N K I L K V I R K N L V K K C I E M F N E I A E N K E D Y N K F Y E A F S K N L K L G I H E D S Q N R |     |     |     |     |     |     |     |
| MiHSP90.1 | E Y L G F V K G V V D S D D L P L N I S R E M L Q Q N K I L K V I R K N L V K K C I E M F S E I A E N K E D Y N K F Y E A F S K N L K L G I H E D S Q N R |     |     |     |     |     |     |     |
| AtHSP90.1 | E Y L S F V K G V V D S D D L P L N I S R E T L Q Q N K I L K V I R K N L V K K C I E M F N E I A E N K E D Y T K F Y E A F S K N L K L G I H E D S Q N R |     |     |     |     |     |     |     |

### HSP90 Superfamily

|           |                                                                                                                                                           |     |     |     |     |     |     |
|-----------|-----------------------------------------------------------------------------------------------------------------------------------------------------------|-----|-----|-----|-----|-----|-----|
|           | 470                                                                                                                                                       | 480 | 490 | 500 | 510 | 520 | 530 |
| MiHSP90.5 | A K L A D L L R Y H S T K S G D E L T S F K D Y V T R M K E G Q K D I Y Y I T G E S K K A V E N S P F L E R L K K K G Y E V L F M V D A I D E Y A V G Q L |     |     |     |     |     |     |
| MiHSP90.3 | T K L A E L L R Y H S T K S G D E M T S L K D Y V T R M K E G Q N D I Y Y I T G E S K K A V E N S P F L E K L R K K G Y E V L F M V D A I D E Y A I G Q L |     |     |     |     |     |     |
| MiHSP90.4 | T K L A E L L R Y H S T K S G D E L T S L K D Y V T R M K E G Q N D I Y Y I T G E S K K A V E N S P F L E K L K K K G Y E V L F M V D T I D E Y A V G Q L |     |     |     |     |     |     |
| AtHSP90.2 | T K I A E L L R Y H S T K S G D E L T S L K D Y V T R M K E G Q N D I F Y I T G E S K K A V E N S P F L E K L K K K G I E V L Y M V D A I D E Y A I G Q L |     |     |     |     |     |     |
| SIHSP90.2 | A K F A E L L R Y H S T K S G D E M T S L K D Y V T R M K E G Q N D I Y Y I T G E S K K A V E N S P F L E K L K K K G Y E V L Y M V D A I D E Y S I G Q L |     |     |     |     |     |     |
| MiHSP90.2 | V K L A E L L R Y Y S T K S G D E M T S L K D Y V T R M K E G Q K D I Y Y I T G E S K K A V E N S P F L E K L K K K G Y E V L Y M V D A I D E Y A V G Q L |     |     |     |     |     |     |
| SIHSP90.1 | A K L A D L L R Y H S T K S G D E L T S L K D Y V T R M K E G Q K D I Y Y I T G E S K K A V E N S P F L E R L K K K G Y E V L Y M V D A I D E Y A V G Q L |     |     |     |     |     |     |
| MiHSP90.1 | T K L A D L L R Y H S T K S G D E L T S L K D Y V T R M K E G Q K D I Y Y I T G E S K K A V E N S P F L E R L K K K G Y E V L F M V D A I D E Y A V G Q L |     |     |     |     |     |     |
| AtHSP90.1 | G K I A D L L R Y H S T K S G D E M T S F K D Y V T R M K E G Q K D I F Y I T G E S K K A V E N S P F L E R L K K R G Y E V L Y M V D A I D E Y A V G Q L |     |     |     |     |     |     |

### HSP90 Superfamily

|           |                                                                                                                                                           |     |     |     |     |     |     |     |
|-----------|-----------------------------------------------------------------------------------------------------------------------------------------------------------|-----|-----|-----|-----|-----|-----|-----|
|           | 540                                                                                                                                                       | 550 | 560 | 570 | 580 | 590 | 600 | 610 |
| MiHSP90.5 | K E Y D S K K L V S A T K E G L K L D E T E E E K K K K E E K K L S F E N L C K T I K E I L G D K V E K V V S D R I V D S P C C L V T G E Y G W S A N     |     |     |     |     |     |     |     |
| MiHSP90.3 | K E F E G K K L V S A T K E G L K L D E T E D - E K K K K E T L K E K F E G L C K V I K D V L A D R V E K V V S D R V V D S P C C L V T G E Y G W T A N   |     |     |     |     |     |     |     |
| MiHSP90.4 | K E F E G K K L V S A T K E G L K L D E S E D - E K K K K E A L K E K F E G L C K V I K D V L G D R V E K V V S D R V V D S P C C L V T G E Y G W T A N   |     |     |     |     |     |     |     |
| AtHSP90.2 | K E F E G K K L V S A T K E G L K L D E T E D - E K K K K E E L K E K F E G L C K V I K D V L G D K V E K V I V S D R V V D S P C C L V T G E Y G W T A N |     |     |     |     |     |     |     |
| SIHSP90.2 | K E F E G K K L V S A T K E G L K L D E S E D - E K K K Q E E L K E K F E G L C K V M K D V L G D K V E K V I V S D R V V D S P C C L V T G E Y G W T A N |     |     |     |     |     |     |     |
| MiHSP90.2 | K E Y D G K K L V S A T K E G L K L D E D E - Q D K Q K K E E K K K S F E N L C K T I K E I L G D K V E K V V S D R I V D S P C C L V T G E Y G W T A N   |     |     |     |     |     |     |     |
| SIHSP90.1 | K E Y D G K K L V S A T K E G L K L D D S E E E K K K K E E K K K S F E N L C K I K D I L G D K V E K V V S D R I V D S P C C L V T G E Y G W T A N       |     |     |     |     |     |     |     |
| MiHSP90.1 | K E Y D G K K L V S A T K E G L K L D E T E E E K N K K E E K K K S F E N L C K T I K D I L G D K V E K V V S D R I V D S P C C L V T G E Y G W S A N     |     |     |     |     |     |     |     |
| AtHSP90.1 | K E Y D G K K L V S A T K E G L K L D E T E E E K K K R E E K K K S F E N L C K T I K E I L G D K V E K V V S D R I V D S P C C L V T G E Y G W T A N     |     |     |     |     |     |     |     |

### HSP90 Superfamily

|           | 620          | 630   | 640            | 650 | 660                        | 670                 | 680 | 690 |
|-----------|--------------|-------|----------------|-----|----------------------------|---------------------|-----|-----|
| MiHSP90.5 | MERIMKAQALRD | NSMGS | YMSSKKTMEINPDN | G   | IMEELRKRAEADKNDKSVKDLVMLL  | LFETALLTSGFSLDEPNTF | AS  |     |
| MiHSP90.3 | MERIMKAQALRD | NSMAG | YMSSKKTMEINPEN | P   | IMEELRKRADADKNDKSVKDLVLLL  | FETALLTSGFSLDDPNTF  | GN  |     |
| MiHSP90.4 | MERIMKAQALRD | NSMAG | YMSSKKTMEINPEN | P   | IMEELRKRSADADKNDKSVKDLVLLL | FETALLTSGFSLDEPNTF  | GN  |     |
| AtHSP90.2 | MERIMKAQALRD | SSMAG | YMSSKKTMEINPEN | S   | IMDELKRADADKNDKSVKDLVLLL   | FETALLTSGFSLDEPNTF  | GS  |     |
| SIHSP90.2 | MERIMKAQALRD | SSMAG | YMSSKKTMEINPEN | S   | IMDELKRADADKNDKSVKDLVLLL   | FETALLTSGFSLDEPNTF  | GN  |     |
| MiHSP90.2 | MERIMKAQALRD | NSMSA | YMSSKKTMEINPDN | G   | IMEELRKRAEADKNDKSVKDLVLLL  | FETALLTSGFSLDDPNTF  | AA  |     |
| MiHSP90.1 | MERIMKAQALRD | TSMS  | YMSSKKTMEINPDN | G   | IMEELRKRAEADQNDKSVKDLVLLL  | FETALLTSGFSLDDPNTF  | AA  |     |
| SIHSP90.1 | MERIMKAQALRD | NSMGS | YMSSKETMEINPDN | G   | IMEELRKRAEADKNDKSVKDLVMLL  | FETALLTSGFSLDEPNTF  | AS  |     |
| AtHSP90.1 | MERIMKAQALRD | SSMSG | YMSSKKTMEINPDN | G   | IMEELRKRAEADKNDKSVKDLVMLL  | LYETALLTSGFSLDEPNTF | AA  |     |

### HSP90 Superfamily
