# Supplementary material for: Genome-wide identification of gene families related to miRNA biogenesis in Mangifera indica L. and their possible role during heat stress
Source: PeerJ. 2024 Jul 17;12:e17737. doi: 10.7717/peerj.17737 (PMC11260077; doi:10.7717/peerj.17737)
Supplement: Supplemental Information 12 [file peerj-12-17737-s012.xlsx]

## Sheet: Hoja1
	ARE	MBS	MYB	WRE	DRE1	MYC	MeJA-responsive	P-Box	ABRE	GC-motif	TCA-element	ERE	TC-rich repeats	AAGAA-motif	STRE	AS-1	GARE	MBSI	SARE	CCAAT-box
MiDCL1		2	3			5	2	2	2
MiDCL2a	1		2				4		2	1
MiDCL2b	1		3	2					2		3	5	1
MiDCL3	2		5			3		1				4	1
MiDCL4	1		8								1	6	1	3	1
MiHEN1	1	1	2			3	5		3		2	3		2		5
MiHST	3		3			3	10		3			2	1		2	5	2
MiHSP90	1	1	19	3	1	2					2			1	1		1
MiAGO1a	2	1	3			1	2		5			3		2		1
MiAGO1b	2		7	1		2					1	3			1
MiAGO2a	1		4			1	4	1	1			1		1	1	2		1
MiAGO2b	1		4	4		3		2			2	1			2		1
MiAGO4a			6			4	2	1	3		1	1				1
MiAGO4b	1	1	5		1	6				3		1	1	2				1	1
MiAGO5	1		1	1		4	4	1	1			5	1	1		2
MiAGO6	8		3	1		2							1
MiAGO7a			7	1		5	4		7		1	1	1		1					1
MiAGO7b			7	1		1	4	1			1	2				2	1
MiAGO10	4	1	9		1	2						2		1	2
MiAGOMEL1	1					1			1	1	3	3			4
MiAGOPNH1	3		2			2	4				1	5	1	1	1	2
MiSE1	1					1	2		1			1		1	1	1
MiSE2	2		2			1			3			5			1
MiHYL1A			3		1	3	10		3		1				2	5
MiHYL1B	2	3	12	2		1		1			1		1	1						2
MiHYL1C		1	5						2			1		2	1
MiHYL1D	1		7			2	6		4					1	2	3	1
MiHYL1E	2		3		1	3	4		5					1	1	2
MiHYL1F	1			2		4	2				1	1				1
