# Supplementary material for: Genome-wide identification of gene families related to miRNA biogenesis in Mangifera indica L. and their possible role during heat stress
Source: PeerJ. 2024 Jul 17;12:e17737. doi: 10.7717/peerj.17737 (PMC11260077; doi:10.7717/peerj.17737)
Supplement: Supplemental Information 13 [file peerj-12-17737-s013.xlsx]

## Sheet: AGOs
Gene pairs		Duplication type	Ka	Ks	Ka/Ks	Selection pressure	Divergence time（MYA)
MiAGO2b	MiAGO2a	Segmental	0.108052	0.339976	0.317821	Negative	11.3325
MiAGO7b	MiAGO7a	Segmental	0.0399568	0.296397	0.134808	Negative	9.87991
MiAGO6	MiAGO4a	Segmental	0.273588	4.91	0.0557205	Negative	163.667
MiAGOMEL1	MiAGO5	Segmental	0.118088	0.39315	0.300364	Negative	13.105
MiAGOPNH1	MiAGO10	Segmental	0.195634	2.44627	0.0799722	Negative	81.5425
MiAGO1b	MiAGO1a	Segmental	0.0335742	0.322176	0.104211	Negative	10.7392

## Sheet: DCLs
Gene pairs		Duplication type	Ka	Ks	Ka/Ks	Selection pressure	Divergence time（MYA)
MiDCL2b	MiDCL2a	Tandem	0.0411041	0.110324	0.372577	Negative	3.67746
MiDCL4	MiDCL3	Tandem	0.697919	1.98635	0.351357	Negative	66.2117

## Sheet: HYL1
Gene pairs		Duplication type	Ka	Ks	Ka/Ks	Selection pressure	Divergence time（MYA)
HYL1-16	HYL1-18	Segmental	0.087833	0.070496	1.24593	Positive	2.34987
HYL1-15.1	HYL1-15.2	Tandem	0.0173619	0.0261872	0.662991	Negative	0.872907
SE-3	240,2,127
