# Supplementary material for: Genome-wide identification of gene families related to miRNA biogenesis in Mangifera indica L. and their possible role during heat stress
Source: PeerJ. 2024 Jul 17;12:e17737. doi: 10.7717/peerj.17737 (PMC11260077; doi:10.7717/peerj.17737)
Supplement: Supplemental Information 14 [file peerj-12-17737-s014.xlsx]

## Sheet: General Info
General Info
Ord File Name	C:\Users\Propietario\Documents\Andrés\Corrida final controles GAPDH 12 jul 2018.ord
Software Version	2.2.250.602
Instrument Name	PR0961400539
Instrument Serial	PR0961400539
Instrument Version	PCR 2.3.2, RT 1.1.12.23
Used Data Step	1
Sample Group	Default
Protocol Log	StartTime: 12/07/2018 01:43:47 p.m.
	RunTime: 01:21:03
	Path: /SHARED/PCPTP
	No errors

## Sheet: Plate
Well	Fluorophore	Sample Type	Target	Description	Quantity	AD Std Value	Replicate	Sample Name		Sample Group	Default
A01-Ch1	[none]	[none]			0						A1
A01-Ch2	[none]	[none]			0						A2
A01-Ch3	ROX	Unknown	GAPDH		0						A3
A01-Ch4	[none]	[none]			0						A4
A01-Ch5	SYBR	Unknown	GAPDH		0						A5
A02-Ch1	[none]	[none]			0						A6
A02-Ch2	[none]	[none]			0						A7
A02-Ch3	ROX	Unknown	GAPDH		0						A8
A02-Ch4	[none]	[none]			0						A9
A02-Ch5	SYBR	Unknown	GAPDH		0						A10
A03-Ch1	[none]	[none]			0						A11
A03-Ch2	[none]	[none]			0						A12
A03-Ch3	ROX	Unknown	GAPDH		0						A13
A03-Ch4	[none]	[none]			0						A14
A03-Ch5	SYBR	Unknown	GAPDH		0						A15
A04-Ch1	[none]	[none]			0						A16
A04-Ch2	[none]	[none]			0						B1
A04-Ch3	ROX	Unknown	GAPDH		0						B2
A04-Ch4	[none]	[none]			0						B3
A04-Ch5	SYBR	Unknown	GAPDH		0						B4
A05-Ch1	[none]	[none]			0						B5
A05-Ch2	[none]	[none]			0						B6
A05-Ch3	ROX	Unknown	GAPDH		0						B7
A05-Ch4	[none]	[none]			0						B8
A05-Ch5	SYBR	Unknown	GAPDH		0						B9
A06-Ch1	[none]	[none]			0						B10
A06-Ch2	[none]	[none]			0						B11
A06-Ch3	ROX	Unknown	GAPDH		0						B12
A06-Ch4	[none]	[none]			0						B13
A06-Ch5	SYBR	Unknown	GAPDH		0						B14
A07-Ch1	[none]	[none]			0						B15
A07-Ch2	[none]	[none]			0						B16
A07-Ch3	ROX	Unknown	GAPDH		0						C1
A07-Ch4	[none]	[none]			0						C2
A07-Ch5	SYBR	Unknown	GAPDH		0						C3
A08-Ch1	[none]	[none]			0						C4
A08-Ch2	[none]	[none]			0						C5
A08-Ch3	ROX	Unknown	GAPDH		0						C6
A08-Ch4	[none]	[none]			0						C7
A08-Ch5	SYBR	Unknown	GAPDH		0						C8
A09-Ch1	[none]	[none]			0						C9
A09-Ch2	[none]	[none]			0						C10
A09-Ch3	ROX	Unknown	GAPDH		0						C11
A09-Ch4	[none]	[none]			0						C12
A09-Ch5	SYBR	Unknown	GAPDH		0						C13
A10-Ch1	[none]	[none]			0						C14
A10-Ch2	[none]	[none]			0						C15
A10-Ch3	ROX	Unknown	GAPDH		0						C16
A10-Ch4	[none]	[none]			0						D1
A10-Ch5	SYBR	Unknown	GAPDH		0						D2
A11-Ch1	[none]	[none]			0						D3
A11-Ch2	[none]	[none]			0						D4
A11-Ch3	ROX	Unknown	GAPDH		0						D5
A11-Ch4	[none]	[none]			0						D6

## Sheet: Protocol
Reaction volume	10		Channel in use:
Consumable	1		Ch 1	No
Ramp rate	7		Ch 2	No
Heated lid ON	True		Ch 3	Yes (ROX)
Heated lid temperature	105		Ch 4	No
			Ch 5	Yes (SYBR)
	No	Cycle	Type	Information
	1		Temperature	Temp.: 95°C; Time:07:00
	2		Cycle	Number of cycles to loop:40; Number of steps inside loop:2
	3	*	. Temperature	Temp.: 95°C; Time:00:05
DA	4	*	. Temperature	Temp.: 60°C; Time:00:30; Data acquisition:True
	5		Temperature	Temp.: 60°C; Time:00:30
	6		Melting Curve	Start temperature:60°C; End temperature:95°C; Hold time:00:01; Temperature increment after hold:0.2°C
	7		Temperature	Temp.: 20°C; Time:00:10

## Sheet: Acquired Data 1
Data step:	4			Show channel:	Thresholds:
Sample Group:	Default		Ch 1	No
Method:	Threshold		Ch 2	No
Smoothing:	ON		Ch 3	No
Smoothing window:	5		Ch 4	No
Baseline:	Trend		Ch 5	Yes	110.1
Baseline range start:	3
Baseline range end:	7
Channel	Cycle	Temp	A1	A2	A3	A4	A5	A6	A7	A8	A9	A10	A11	A12	A13	A14	A15	A16	B1	B2	B3	B4	B5	B6	B7	B8
5	1	60	4.54	3.93	0.64	4.43	6.28	1.65	3.45	4.38	1	3.23	3.16	4.63	2.09	1.59	4.02	7.65	4.26	4.91	4.82	5.54	3.55	4.97	6.99	5.54
5	2	60	1.76	1.76	1.11	2.12	2.61	1.99	1.7	2.46	1.34	2.67	1.85	2.46	1.75	1.69	0.93	4.75	1.5	1.98	1.4	1.85	1.5	1.92	2.04	2.55
5	3	60	-0.62	0.02	0.81	0.09	-0.34	1.22	0.17	0.55	0.9	1.28	0.35	0.39	0.72	1.03	-1.24	1.82	-0.65	-0.43	-0.93	-0.94	-0.32	-0.52	-1.44	-0.1
5	4	60	-5.24	-3	-1.92	-3.5	-5.3	-3.2	-3.21	-3.57	-1.56	-3.54	-3.79	-4.08	-3.59	-2.72	-4.44	-3.35	-4.17	-3.58	-3.76	-5.16	-3.72	-4.3	-5.66	-4.37
5	5	60	-2.86	-2.4	-0.98	-2.66	-2.57	-1.09	-1.44	-2.29	-0.92	-2.45	-1.08	-1.85	-1.3	-2.24	-1.24	-1.84	-2.48	-2.43	-1.71	-2.45	-1.67	-2.64	-2.97	-3.28
5	6	60	-0.78	-1.81	-1.13	-2.53	-1.98	-1.66	-1.28	-2.19	-1.12	-2.02	-1.1	-2.07	-0.83	-0.98	-0.53	-1.72	-0.75	-1.91	-1.49	-1.68	-1.02	-1.57	-0.65	-2.67
5	7	60	0.16	-1.04	0.52	0.32	-0.72	-0.03	-0.44	-1.52	-0.68	-1.16	-0.91	-1.42	0.64	0.49	0.34	-0.32	0.56	-0.91	-0.32	0.51	0.43	-0.99	-0.26	-0.51
5	8	60	0.89	0.74	1.09	1.54	-0.08	-0.37	0.04	0.49	-0.56	-0.43	-0.96	-0.83	0.11	1.57	0.93	-1.05	1.14	-0.42	0.68	0.82	-0.08	0.2	-0.06	0.12
5	9	60	1.64	0.4	0.7	-0.3	-0.75	0.53	0.03	0.9	0.95	0.25	0.19	0.38	-0.37	-0.08	1.29	-0.36	0.17	-0.09	-0.36	0.53	-0.25	0.26	-0.61	-0.16
5	10	60	-0.01	-1.44	-0.7	-2.81	-1.8	-0.8	-1.77	-2.67	-0.03	-0.91	0.2	-1.61	-0.79	-1.68	-0.59	-2.12	-1.53	-0.9	-1.57	-1.83	-1.26	-0.71	-1.28	-1.45
5	11	60	-1.94	-1.2	-2.16	-2.56	-1.96	-1.03	-1.7	-3.54	-1.81	-1.3	-1.2	-1.6	-1.41	-2.19	-1.23	-3.61	-1.51	-0.94	-1.09	-1.11	-0.59	-0.32	-1.74	-0.51
5	12	60	-0.09	0.82	0.11	0.56	0.69	0.28	0.33	0.77	0.31	0.33	0.4	0.43	0.37	0.8	0.13	-3.22	0.5	1.68	1.55	0.3	1.69	1.72	1.02	0.73
5	13	60	2.56	2.32	1.96	2.86	3.57	1.89	2.46	4.38	2.19	2.35	2.17	3.38	1.54	2.22	1.31	-1.02	1.84	2.55	2	2.21	2	2.26	2.49	2.42
5	14	60	1.93	0.91	-0.04	2.43	2.34	0.62	1.66	1.67	1.22	1.22	0.92	1.79	1.08	0.51	0.32	-3.97	1.12	0.5	0.78	1.41	-0.26	-0.26	2.12	1.67
5	15	60	2.38	1.69	-4.17	1.07	1.77	0.29	2.26	0.18	-0.19	0.48	-0.21	0.97	-0.77	-0.5	0.87	-5.85	0.87	0.53	1.08	1.16	-1.14	-1.02	1.88	2.52
5	16	60	9.61	5.56	0.99	7.72	7.92	7.29	8.56	7.41	6.94	4.46	4.85	4.93	5.71	6.74	6.13	-2.99	5.92	6.58	7.51	5.3	4.27	4.04	9.29	10.12
5	17	60	21.03	16.29	11.06	21.84	20.22	19.04	18.88	18.59	15.65	13.26	13.97	11.79	17.1	16.6	14.86	3.85	15.84	17.64	16.38	13.61	10.48	12.07	21.85	24.44
5	18	60	33.4	30.45	21.47	38.35	35.75	33.48	31.37	33.56	25.24	24.34	25.35	20.53	30.49	28.42	25.29	4.39	29.5	31.65	27.5	21.64	17.26	19.83	37.81	44.54
5	19	60	54.95	53.77	32.19	60.28	60.82	56.74	50.92	51.62	37.27	39.06	40.87	31.41	49.23	44.97	43.06	3.1	49.14	54.24	43.66	30.65	25.15	29.01	62.96	74.37
5	20	60	98.98	93	54.92	101.97	107.16	100.46	86.67	89.09	63.96	67.19	69.34	53.75	86.35	80.5	78.45	1.41	87.34	94.54	77.14	49.99	41.29	47.45	113.36	129.62
5	21	60	179.98	172.87	103.73	187.01	195.52	183.61	155.62	159.34	116.97	124.81	123.2	94.7	155.19	147.53	147.16	1.53	163.63	173.27	139.11	90.07	74.23	85.33	207.66	233.28
5	22	60	316.95	307.11	186.1	327.51	344.89	325.46	273.26	283.98	204.96	222.54	220.37	168.51	274.38	263.09	259.4	2.93	292.08	305.3	243.71	164.39	136.49	154.99	356.95	404.6
5	23	60	506.41	495.75	300.11	527.16	553.58	521.68	447.77	470.01	328.55	363.92	365.28	278.02	442.56	426.64	421.05	5.33	473.74	493.6	391.15	288.2	240.84	273.26	551.89	626.98
5	24	60	719.19	707.63	422.79	748.73	783.63	737.95	653.93	691.95	469.14	531.66	540.12	412.92	635.65	617.57	608.96	9.26	680.6	710.46	560.88	467.01	390.94	443.44	746.59	848.26
5	25	60	904.48	895.89	532.21	940.52	979.37	920.8	846.14	896.18	596.62	689.83	705.74	538.75	802.35	782.76	775.87	15.04	863.8	903.79	709.6	671.57	567.24	641.11	896.51	1021.67
5	26	60	1041.7	1031.35	608.77	1074.35	1118.24	1049.35	988.89	1047.38	695.21	811.72	833.51	635.5	923.91	896.75	893.01	29.4	995.38	1046.75	816.93	861.44	733.19	825.19	994.13	1138.31
5	27	60	1112.25	1104.51	648.5	1144.56	1191.21	1115.59	1070.05	1131.55	751.39	880.97	904.94	692.67	986.48	954.52	953.32	52.49	1066.31	1122.76	876.12	991.32	847.57	953.09	1046.76	1196.5
5	28	60	1139.9	1133.3	660.92	1171.98	1220.82	1144.97	1103.73	1168.11	776.69	910.83	935.21	717.1	1009.69	978.45	978.66	92.38	1095.28	1152.05	899.31	1059.16	905.74	1017.57	1065.7	1215.58
5	29	60	1161.05	1157.45	678.82	1192.55	1245.09	1167.85	1128.97	1195.22	795.11	932.97	959.72	735.91	1029.3	1000.03	999.93	168.94	1119.97	1172.99	917.73	1100.51	942.52	1056.4	1080.96	1234.54
5	30	60	1182.02	1176.97	692.97	1212.51	1268.52	1188.15	1148.44	1220.57	815.29	952.86	983.25	752.72	1048.29	1019.2	1019.43	290.33	1141.96	1193.45	933.99	1128.87	968.76	1082.21	1097.42	1254.04
5	31	60	1188.75	1182.34	695.2	1217.83	1272.49	1192.7	1153.91	1224.71	823.48	956.73	988.25	760.44	1054.83	1025.4	1024.61	446.44	1149.66	1201.23	942.03	1141.12	977.93	1091.58	1102.71	1255.74
5	32	60	1176.33	1168.35	683.83	1206.58	1259.37	1181.4	1143.04	1213.24	818.75	946.99	977.83	752.05	1043.85	1017.63	1017.52	604.66	1135.77	1189.65	932.63	1135.79	967.13	1083.98	1092.11	1242.34
5	33	60	1168.73	1162.28	682.02	1201.05	1256.02	1173.81	1135.79	1207.11	816.51	943.79	972.4	749.18	1037.29	1015.33	1016.49	730.53	1128.98	1184.77	927.39	1132.41	962.53	1079.04	1084.37	1235.64
5	34	60	1166.19	1160.81	682.12	1202.35	1259.61	1173.74	1134.85	1209.53	818.03	946.43	972.94	746.64	1034.91	1014.32	1015.25	804.45	1128.12	1182.15	925.62	1130.69	960.63	1076.91	1084.86	1237.38
5	35	60	1188.57	1184.16	698.33	1226.45	1280.98	1197.24	1158.66	1230.23	836.73	964.13	990.94	762.66	1053.57	1032.3	1034.75	849.97	1151.67	1206.09	944.9	1150.18	978.74	1093.41	1105.93	1261.49
5	36	60	1209.33	1202.83	707.65	1248.08	1302.67	1217.98	1182.61	1249.84	855.47	980.84	1009.54	777.22	1075.59	1050.1	1052.82	871.32	1171.54	1228.57	962.22	1168.2	994.09	1113.99	1126.35	1283.33
5	37	60	1208.88	1198.93	703.81	1244.05	1303.01	1216.71	1182.75	1248.7	856.89	980.4	1012.75	779.93	1076.5	1052.36	1052.71	865.3	1172.97	1231.1	961.93	1168.58	994.53	1112.31	1125.45	1282.47
5	38	60	1188.9	1176.56	686.03	1218.6	1279.99	1191.83	1158.77	1229.03	837.76	961.44	993.29	763.96	1057.73	1033.46	1030.99	841.67	1151.14	1207.81	943.75	1145.92	975.64	1089.81	1104.83	1256.45
5	39	60	1180.41	1166.85	677.72	1208.16	1270.48	1181.49	1149.07	1218.95	829.72	953.19	984.75	756.96	1047.69	1023.43	1019.68	829.46	1141.69	1194.84	934.87	1134.94	968.24	1078.97	1097.19	1243.35
5	40	60	1177.01	1164.06	674.53	1204.84	1266.16	1177.55	1145.35	1212.82	825.67	949.23	979.94	753.78	1040.28	1016.6	1012.88	822.27	1137.09	1184.97	929.68	1128.31	966.12	1072.57	1095.31	1234.97

## Sheet: Cq Results
Data step:	4			Show channel:	Thresholds:
Sample Group:	Default		Ch 1	No
Method:	Threshold		Ch 2	No
Smoothing:	ON		Ch 3	No
Smoothing window:	5		Ch 4	No
Baseline:	Trend		Ch 5	Yes	110.1
Baseline range start:	3
Baseline range end:	7
Well	Replicate	Fluorophore	Sample Type	Sample Name	Target	Cq	Quantity	Omitted	Description
A01-Ch5		SYBR	Unknown		GAPDH	20.14	NeuN
A02-Ch5		SYBR	Unknown		GAPDH	20.21	NeuN
A03-Ch5		SYBR	Unknown		GAPDH	21.08	NeuN
A04-Ch5		SYBR	Unknown		GAPDH	20.1	NeuN
A05-Ch5		SYBR	Unknown		GAPDH	20.03	NeuN
A06-Ch5		SYBR	Unknown		GAPDH	20.12	NeuN
A07-Ch5		SYBR	Unknown		GAPDH	20.34	NeuN
A08-Ch5		SYBR	Unknown		GAPDH	20.3	NeuN
A09-Ch5		SYBR	Unknown		GAPDH	20.87	NeuN
A10-Ch5		SYBR	Unknown		GAPDH	20.74	NeuN
A11-Ch5		SYBR	Unknown		GAPDH	20.76	NeuN
A12-Ch5		SYBR	Unknown		GAPDH	21.21	NeuN
A13-Ch5		SYBR	Unknown		GAPDH	20.35	NeuN
A14-Ch5		SYBR	Unknown		GAPDH	20.44	NeuN
A15-Ch5		SYBR	Unknown		GAPDH	20.46	NeuN
A16-Ch5		SYBR	NTC		GAPDH	28.23	0
B01-Ch5		SYBR	Unknown		GAPDH	20.3	NeuN
B02-Ch5		SYBR	Unknown		GAPDH	20.2	NeuN
B03-Ch5		SYBR	Unknown		GAPDH	20.53	NeuN
B04-Ch5		SYBR	Unknown		GAPDH	21.27	NeuN
B05-Ch5		SYBR	Unknown		GAPDH	21.58	NeuN
B06-Ch5		SYBR	Unknown		GAPDH	21.36	NeuN
B07-Ch5		SYBR	Unknown		GAPDH	19.94	NeuN
B08-Ch5		SYBR	Unknown		GAPDH	19.65	NeuN
B09-Ch5		SYBR	Unknown		GAPDH	19.82	NeuN
B10-Ch5		SYBR	Unknown		GAPDH	20.39	NeuN

## Sheet: Melt Curve Data
Sample Group:	Default		Show channel:
Smoothing:	ON		Ch 1	No
Smoothing window:	9		Ch 2	No
Low limit	63.5		Ch 3	Yes
High limit	91.5		Ch 4	No
Max # of peaks:	1		Ch 5	Yes
Peak threshold:	10
Slope Correction:	Yes
Derivative:	Negative
Temp	Channel	A1	A2	A3	A4	A5	A6	A7	A8	A9	A10	A11	A12	A13	A14	A15	A16	B1	B2	B3	B4	B5	B6	B7	B8	B9
60	3	65.05	21.82	3.88	20.49	25.17	16.83	19.7	56.77	49.07	20.41	36.6	0	15.82	11.83	5.56	41.35	21.81	21.19	2.79	19.57	30.92	14.67	18.53	20.2	20.09
60	5	1235.73	1247.81	822.77	1282.86	1346.75	1256.2	1208.76	1279.22	898.76	1023.45	1055.82	810.82	1107.24	1084.98	1089.13	898.88	1209.84	1262.65	996.44	1203.37	1017.55	1140.65	1174.8	1308.17	1199.19
60.2	3	65.75	23.2	5.17	20.66	26.51	16.81	19.99	57.75	50.28	20.89	38.08	0.14	16.31	13.17	8.17	40.71	25.23	20.83	4.74	20.11	29.85	15.61	18.89	20.11	21.06
60.2	5	1236.97	1247.12	822.4	1282.63	1345.23	1253.99	1208.26	1276.76	898.22	1023.3	1054.27	811.45	1109.34	1085.99	1088.3	896.69	1208.66	1261.58	996.81	1202.01	1011.06	1140.26	1173.71	1308.05	1198.75
60.4	3	66.41	24.39	6.13	20.89	27.53	16.82	20.33	58.8	51.59	21.44	39.29	0.32	16.77	14.22	10.28	40.1	27.77	20.83	6.35	20.61	29.05	16.4	19.37	20.04	21.77
60.4	5	1236.88	1245.85	821.77	1281.55	1342.86	1251.35	1207.16	1273.62	897.48	1022.69	1052.49	811.72	1110.51	1086.18	1087.38	893.78	1207.08	1259.88	996.97	1200.31	1004.82	1139.34	1172.2	1307.16	1197.68
60.6	3	67.03	25.37	6.78	21.18	28.24	16.85	20.74	59.92	52.99	22.07	40.23	0.56	17.18	14.96	11.88	39.5	29.43	21.19	7.61	21.07	28.51	17.06	19.96	20.01	22.24
60.6	5	1235.48	1244.02	820.88	1279.61	1339.64	1248.28	1205.48	1269.79	896.54	1021.62	1050.49	811.64	1110.74	1085.56	1086.37	890.15	1205.1	1257.55	996.92	1198.25	998.81	1137.89	1170.27	1305.47	1196
60.8	3	67.62	26.14	7.11	21.53	28.63	16.9	21.21	61.1	54.48	22.76	40.9	0.83	17.56	15.4	12.97	38.92	30.2	21.92	8.54	21.49	28.23	17.56	20.68	20.01	22.45
60.8	5	1232.75	1241.61	819.74	1276.82	1335.55	1244.78	1203.2	1265.28	895.41	1020.09	1048.25	811.19	1110.03	1084.12	1085.28	885.79	1202.73	1254.6	996.64	1195.84	993.05	1135.9	1167.93	1303.01	1193.7
61	3	67.22	26	6.58	21.68	28.15	16.76	22.33	61.56	55.03	23.04	41.6	1.31	17.89	16.12	13.28	38.57	29.74	23.29	9.32	22.16	28.1	17.77	21.88	20.5	21.76
61	5	1228.01	1238.38	818.25	1271.71	1329.54	1239.58	1201.1	1259.26	894.12	1018.44	1046.18	809.41	1106.89	1081.73	1084.16	879.29	1201.15	1251.12	996.33	1193.07	988.44	1133.49	1164.62	1299.56	1191.36
61.2	3	67.68	26.64	7.29	22.72	27.63	17.66	23.12	62.59	56.85	24.07	41.71	1.38	17.9	14.47	14.36	37.16	28.37	24.54	8.61	22.93	29	17.44	23.1	20.38	22.17
61.2	5	1221.08	1233.67	815.07	1265.96	1322.23	1233.69	1195.06	1252.23	891.04	1013.42	1042.26	807.12	1103.92	1077.67	1080.82	872.65	1195.75	1244.78	994.48	1188.13	981.14	1128.07	1160.66	1293.88	1186.49
61.4	3	69.4	28.43	7.03	23.81	28.96	17.66	23.94	65.97	60.06	25.13	41.99	2.71	18.74	14.48	15.57	36.35	28.53	26.72	8.29	22.23	28.92	18.8	23.1	21.6	21.44
61.4	5	1215.87	1228.28	814.29	1262.26	1317.75	1229.16	1190.24	1247.23	889.67	1010.36	1039.47	806.61	1100.86	1073.61	1080.16	868.18	1191.86	1239.27	994.06	1185.7	974.88	1125.78	1156.79	1287.81	1181.63
61.6	3	70.53	28.53	7.41	23.9	29.02	17.54	22.82	68.55	63.45	25.5	40.93	2.88	18.4	15.72	12.61	37.36	28.84	27.88	9.23	21.42	27.97	19.48	22.89	20.96	21.62
61.6	5	1211.37	1225.88	814.1	1261.16	1313.89	1229.01	1187.9	1243.5	889.52	1009.58	1038.53	808.9	1100.82	1072.2	1080.43	867.09	1189.41	1236.43	994.77	1183.52	971.08	1125.58	1155.42	1285.92	1177.42
61.8	3	72.98	29.07	7.97	24.75	29.48	18.16	22.27	70.83	67.01	26.05	39.87	3.22	18.94	15.94	12.79	34.86	28.72	28.44	9.91	21.85	27.56	20.16	24.19	21.43	22.47
61.8	5	1214.07	1230.44	818.6	1263.32	1316.68	1234.06	1191.47	1246.13	891.93	1013.4	1042.07	814.04	1105.03	1076.04	1085.26	867.36	1192.32	1238.68	999.16	1187.56	970.54	1129.57	1159.22	1290.11	1180.81
62	3	73.5	28.14	8.24	24.13	27.67	18.9	21.77	72.79	70.92	25.64	40.96	3.86	18.17	15.31	11.95	35.63	29.79	29.31	11.02	22.17	27.53	20.16	24.18	20.97	22.55
62	5	1213.85	1231.42	820.67	1264.95	1314.45	1233.2	1192.44	1245.25	891.76	1013.44	1042.57	815.23	1105.61	1077.37	1086.67	865.96	1192.36	1238.88	1001.53	1188.82	969.18	1130.46	1158.93	1289.9	1181.17
62.2	3	72.47	27.96	6.78	23.52	27.1	18.55	20.62	74.16	74.1	24.18	40.8	4.44	17.54	14.45	11.28	33.61	31.73	29.53	10.91	22.78	25.78	19.15	22.35	21.59	22.04
62.2	5	1206.11	1226.11	817.81	1259.61	1306.76	1226.33	1186.69	1236.99	887.08	1009.96	1037.38	813.58	1101.35	1074.34	1081.73	861.2	1187.36	1232.05	999.57	1182.31	961.81	1122.93	1152.4	1283.42	1175.84
62.4	3	70.88	26.12	6.29	22.37	25.03	18.66	20.35	74.22	76.78	21.56	40.03	4.47	17.15	12.96	10.36	31.5	31.68	28.63	10.62	21.76	24.59	17.8	20.02	20.09	20.01
62.4	5	1197.96	1220.35	813.89	1252.7	1298.84	1220.44	1180.63	1230.45	884	1005.14	1030.54	812.42	1097.72	1069.35	1077.05	853.76	1182.06	1226.37	996.91	1176.36	953.54	1117.28	1145.57	1276.41	1170.9
62.6	3	72.51	23.49	5.29	21.08	23.21	17.62	20	75.72	79.72	20.32	39.91	4.36	16.82	12.02	10.04	30.32	29.39	28.08	10.81	21.23	22.96	16.14	18.76	18.44	18.33
62.6	5	1185.18	1208.42	806.82	1240.14	1284.3	1209.66	1169.52	1218.32	877.06	995.08	1019.33	806.2	1088.08	1059.42	1068.8	843.32	1170.82	1217.58	989.82	1165.82	943.44	1105.99	1134.82	1264.69	1162.08
62.8	3	75.14	22.91	5.91	21.71	21.18	17.09	20.3	79.82	83.95	20.55	40.12	5.04	17.12	11.66	11.14	28.32	28.45	27.04	10.04	21.97	22.61	14.95	18.3	17.87	18.9
62.8	5	1173.83	1197.76	800.37	1229.61	1270.97	1198.97	1157.8	1207.91	871.6	985.38	1009.76	800.98	1080.53	1051.73	1060.54	835.62	1159.61	1208.33	983.67	1155.71	932.98	1096.12	1125.67	1254	1152.6
63	3	78.43	22.5	6.4	21.35	21.42	16.39	20.79	87.12	87.81	21.06	39.91	5.84	18.38	12.09	14.05	28.86	27.72	25.73	9.84	20.88	20.47	15.36	17.25	18.22	19.33
63	5	1164.01	1186.81	795.69	1222.23	1260.22	1190.29	1148.35	1198.57	867.36	978.08	1002.11	797.26	1074.09	1046.13	1054.91	828.9	1151.23	1199.83	977.99	1147.3	923.61	1089.67	1117.31	1242.87	1143.16
63.2	3	80.41	22.66	6.76	20.31	20.88	15.54	20.3	93.49	91.5	20.48	39.14	6.06	18.22	12.02	13.44	27.3	28.01	23.94	10.45	21.01	19.52	14.22	16.07	17.57	18.8
63.2	5	1156.6	1178.41	794.1	1215.3	1251.53	1185.98	1142.34	1191.85	865.51	972.24	996.38	795.79	1070.75	1043.13	1052.66	824.11	1145.76	1193.2	974.68	1141.15	916.82	1085.57	1111.99	1235.93	1136.35
63.4	3	84.38	23.82	7.77	20.85	20.24	15.83	21.03	104.95	96.14	20.21	41.31	6.05	18.73	13.29	14.69	25.97	27.17	24.5	11.67	22.2	20.09	13.47	16.82	17.67	19.63
63.4	5	1155.49	1176.52	796.01	1213.47	1248.08	1184.11	1139.86	1190.19	865.97	970.86	994.75	797.77	1069.38	1043.68	1054.71	822.28	1145.49	1190.02	976	1140.08	914.55	1085.09	1109.82	1235.06	1134.02
63.6	3	88.16	24.49	8.44	21.76	19.65	17.1	21.69	118.14	101.31	20.45	43.08	7.68	18.59	13.54	15.34	27.83	28.59	24.82	12.79	23.13	20.91	13.84	17.34	19.04	20.19
63.6	5	1148.81	1169.96	794.72	1208.3	1239.28	1175.35	1133.42	1182.8	861.74	965.93	989.4	794.49	1062.98	1039.13	1051.03	816.34	1140.47	1182.84	972.71	1133.65	909.09	1079.68	1103.07	1227.48	1127.16
63.8	3	91.83	25.09	7.97	22.25	20.06	17.35	21.08	135.38	107.73	19.3	43.18	7.97	18.32	13.27	16.43	27.99	29.19	25.66	13.25	22.87	20.96	14.05	17.67	19.25	20.15
63.8	5	1138.01	1159.77	790.27	1199.96	1229.67	1166	1123.55	1172.68	855.55	959.83	981.92	792.38	1054.96	1034.38	1044.91	811.1	1133.33	1172.26	967.44	1123.66	901.33	1070.93	1093.27	1218.11	1118.52
64	3	96.92	24.54	9.28	22.01	20.13	18.65	21.42	158.62	117.96	17.87	44.08	8.2	17.27	14.56	16.12	26.17	30.76	26.12	14.86	22.99	22.25	15.18	17.71	19.12	20.52
64	5	1128.57	1151.38	784.65	1189.2	1218.85	1156.72	1113.45	1162.75	849.25	951.53	972.42	788.86	1046.48	1025.97	1038.02	803.6	1124.83	1162.66	961.24	1114.98	892.56	1062.68	1083.07	1207.25	1108.97
64.2	3	106.56	24.1	9.9	23.9	21.15	19.7	20.54	189.18	133.35	17.3	46.12	9.1	18.77	15.95	16.92	26.48	30.87	26.81	15.34	23.37	22.56	17.32	19.46	20.33	21.13
64.2	5	1118.08	1139.59	777.88	1175.88	1207.11	1144.96	1100.1	1151.31	841.34	941.22	961.42	782.6	1035.91	1015.37	1028.7	795.47	1113.83	1152.03	954.33	1104.13	882.78	1051.98	1072.1	1195.12	1097.72

## Sheet: Melting curve Results
Sample Group:	Default		Show channel:
Smoothing:	ON		Ch 1	No
Smoothing window:	9		Ch 2	No
Low limit	63.5		Ch 3	Yes
High limit	91.5		Ch 4	No
Max # of peaks:	1		Ch 5	Yes
Peak threshold:	10
Slope Correction:	Yes
Derivative:	Negative
Well	Replicate	Fluorophore	Sample Type	Sample Name	Target	Melt Temp 1	Peak Height 1	FW/HM Peak 1	Area Peak 1	Melt Temp 2	Peak Height 2	FW/HM Peak 2	Area Peak 2	Melt Temp 3	Peak Height 3	FW/HM Peak 3	Area Peak 3	Melt Temp 4	Peak Height 4	FW/HM Peak 4	Area Peak 4	Description
A01-Ch3		ROX	Unknown		GAPDH	87.31	112.257450171959	0.448750773686171	53.61908428911	0	0	0	0	0	0	0	0	0	0	0	0
A01-Ch5		SYBR	Unknown		GAPDH	80.71	726.980595128309	1.40175376744433	1084.65987210258	0	0	0	0	0	0	0	0	0	0	0	0
A02-Ch3		ROX	Unknown		GAPDH	79.72	36.0164727357102	0.367574804574251	14.0909966757672	0	0	0	0	0	0	0	0	0	0	0	0
A02-Ch5		SYBR	Unknown		GAPDH	80.6799999999999	713.269596645665	1.43135775829651	1086.67814195821	0	0	0	0	0	0	0	0	0	0	0	0
A03-Ch3		ROX	Unknown		GAPDH	65.79	11.1521630422487	0.281800525903702	3.35046092704316	0	0	0	0	0	0	0	0	0	0	0	0
A03-Ch5		SYBR	Unknown		GAPDH	80.45	419.088612312087	1.51422377894609	675.452704267345	0	0	0	0	0	0	0	0	0	0	0	0
A04-Ch3		ROX	Unknown		GAPDH	76.12	24.3238161218734	0.500592498891056	12.9603005178625	0	0	0	0	0	0	0	0	0	0	0	0
A04-Ch5		SYBR	Unknown		GAPDH	80.5899999999999	699.038481332124	1.48725546222576	1106.58729381401	0	0	0	0	0	0	0	0	0	0	0	0
A05-Ch3		ROX	Unknown		GAPDH	87.5099999999999	57.1775421106595	0.355641959702969	21.6434654647616	0	0	0	0	0	0	0	0	0	0	0	0
A05-Ch5		SYBR	Unknown		GAPDH	80.5999999999999	759.337002762496	1.44822572738011	1170.4957598207	0	0	0	0	0	0	0	0	0	0	0	0
A06-Ch3		ROX	Unknown		GAPDH	87.5099999999999	23.5787053168782	0.458837679988146	11.5153739709527	0	0	0	0	0	0	0	0	0	0	0	0
A06-Ch5		SYBR	Unknown		GAPDH	80.5999999999999	689.515619720077	1.46086533608534	1072.14448410612	0	0	0	0	0	0	0	0	0	0	0	0
A07-Ch3		ROX	Unknown		GAPDH	76.27	32.3714752906888	0.464586009098589	16.0076521961955	0	0	0	0	0	0	0	0	0	0	0	0
A07-Ch5		SYBR	Unknown		GAPDH	80.5999999999999	670.674375237637	1.45500198283265	1038.66218710064	0	0	0	0	0	0	0	0	0	0	0	0
A08-Ch3		ROX	Unknown		GAPDH	65.7200000000001	65.4952531029255	0.946184727132506	65.9606278871634	0	0	0	0	0	0	0	0	0	0	0	0
A08-Ch5		SYBR	Unknown		GAPDH	80.6199999999999	714.041393511627	1.45234472368662	1103.80440497422	0	0	0	0	0	0	0	0	0	0	0	0
A09-Ch3		ROX	Unknown		GAPDH	66.5100000000002	42.1268779458283	1.18012056861366	52.9157160101429	0	0	0	0	0	0	0	0	0	0	0	0
A09-Ch5		SYBR	Unknown		GAPDH	80.4900000000001	480.039052537458	1.53193327578264	782.736241159403	0	0	0	0	0	0	0	0	0	0	0	0
A10-Ch3		ROX	Unknown		GAPDH	76.19	34.4984630985896	0.509368571265042	18.7038458884226	0	0	0	0	0	0	0	0	0	0	0	0
A10-Ch5		SYBR	Unknown		GAPDH	80.57	573.064008367504	1.45197921744646	885.650875206875	0	0	0	0	0	0	0	0	0	0	0	0
A11-Ch3		ROX	Unknown		GAPDH	69.3200000000001	64.5459633662959	0.839998353092931	57.7093980652618	0	0	0	0	0	0	0	0	0	0	0	0
A11-Ch5		SYBR	Unknown		GAPDH	80.6799999999999	614.111202543359	1.39487793312636	911.76359223283	0	0	0	0	0	0	0	0	0	0	0	0
A12-Ch3		ROX	Unknown		GAPDH	0	0	0	0	0	0	0	0	0	0	0	0	0	0	0	0
A12-Ch5		SYBR	Unknown		GAPDH	80.6399999999999	442.253784645276	1.34124176308312	631.360850651244	0	0	0	0	0	0	0	0	0	0	0	0
A13-Ch3		ROX	Unknown		GAPDH	76.18	27.1122346157753	0.244249993228912	7.10499193300672	0	0	0	0	0	0	0	0	0	0	0	0
