# Supplementary material for: Genome-wide identification of gene families related to miRNA biogenesis in Mangifera indica L. and their possible role during heat stress
Source: PeerJ. 2024 Jul 17;12:e17737. doi: 10.7717/peerj.17737 (PMC11260077; doi:10.7717/peerj.17737)
Supplement: Supplemental Information 15 [file peerj-12-17737-s015.xlsx]

## Sheet: General Info
General Info
Ord File Name	C:\Users\Propietario\Documents\Andrés\Corrida final tratados GAPDH 12 jul 2018.ord
Software Version	2.2.250.602
Instrument Name	PR0961400539
Instrument Serial	PR0961400539
Instrument Version	PCR 2.3.2, RT 1.1.12.23
Used Data Step	1
Sample Group	Default
Protocol Log	StartTime: 12/07/2018 03:21:49 p.m.
	RunTime: 01:21:05
	Path: /SHARED/PCPTP
	No errors

## Sheet: Plate
Well	Fluorophore	Sample Type	Target	Description	Quantity	AD Std Value	Replicate	Sample Name		Sample Group	Default
A01-Ch1	[none]	[none]			0						A1
A01-Ch2	[none]	[none]			0						A2
A01-Ch3	ROX	Unknown	GAPDH		0						A3
A01-Ch4	[none]	[none]			0						A4
A01-Ch5	SYBR	Unknown	GAPDH		0						A5
A02-Ch1	[none]	[none]			0						A6
A02-Ch2	[none]	[none]			0						A7
A02-Ch3	ROX	Unknown	GAPDH		0						A8
A02-Ch4	[none]	[none]			0						A9
A02-Ch5	SYBR	Unknown	GAPDH		0						A10
A03-Ch1	[none]	[none]			0						A11
A03-Ch2	[none]	[none]			0						A12
A03-Ch3	ROX	Unknown	GAPDH		0						A13
A03-Ch4	[none]	[none]			0						A14
A03-Ch5	SYBR	Unknown	GAPDH		0						A15
A04-Ch1	[none]	[none]			0						A16
A04-Ch2	[none]	[none]			0						B1
A04-Ch3	ROX	Unknown	GAPDH		0						B2
A04-Ch4	[none]	[none]			0						B3
A04-Ch5	SYBR	Unknown	GAPDH		0						B4
A05-Ch1	[none]	[none]			0						B5
A05-Ch2	[none]	[none]			0						B6
A05-Ch3	ROX	Unknown	GAPDH		0						B7
A05-Ch4	[none]	[none]			0						B8
A05-Ch5	SYBR	Unknown	GAPDH		0						B9
A06-Ch1	[none]	[none]			0						B10
A06-Ch2	[none]	[none]			0						B11
A06-Ch3	ROX	Unknown	GAPDH		0						B12
A06-Ch4	[none]	[none]			0						B13
A06-Ch5	SYBR	Unknown	GAPDH		0						B14
A07-Ch1	[none]	[none]			0						B15
A07-Ch2	[none]	[none]			0						B16
A07-Ch3	ROX	Unknown	GAPDH		0						C1
A07-Ch4	[none]	[none]			0						C2
A07-Ch5	SYBR	Unknown	GAPDH		0						C3
A08-Ch1	[none]	[none]			0						C4
A08-Ch2	[none]	[none]			0						C5
A08-Ch3	ROX	Unknown	GAPDH		0						C6
A08-Ch4	[none]	[none]			0						C7
A08-Ch5	SYBR	Unknown	GAPDH		0						C8
A09-Ch1	[none]	[none]			0						C9
A09-Ch2	[none]	[none]			0						C10
A09-Ch3	ROX	Unknown	GAPDH		0						C11
A09-Ch4	[none]	[none]			0						C12
A09-Ch5	SYBR	Unknown	GAPDH		0						C13
A10-Ch1	[none]	[none]			0						C14
A10-Ch2	[none]	[none]			0						C15
A10-Ch3	ROX	Unknown	GAPDH		0						C16
A10-Ch4	[none]	[none]			0						D1
A10-Ch5	SYBR	Unknown	GAPDH		0						D2
A11-Ch1	[none]	[none]			0						D3
A11-Ch2	[none]	[none]			0						D4
A11-Ch3	ROX	Unknown	GAPDH		0						D5
A11-Ch4	[none]	[none]			0						D6

## Sheet: Protocol
Reaction volume	10		Channel in use:
Consumable	1		Ch 1	No
Ramp rate	7		Ch 2	No
Heated lid ON	True		Ch 3	Yes (ROX)
Heated lid temperature	105		Ch 4	No
			Ch 5	Yes (SYBR)
	No	Cycle	Type	Information
	1		Temperature	Temp.: 95°C; Time:07:00
	2		Cycle	Number of cycles to loop:40; Number of steps inside loop:2
	3	*	. Temperature	Temp.: 95°C; Time:00:05
DA	4	*	. Temperature	Temp.: 60°C; Time:00:30; Data acquisition:True
	5		Temperature	Temp.: 60°C; Time:00:30
	6		Melting Curve	Start temperature:60°C; End temperature:95°C; Hold time:00:01; Temperature increment after hold:0.2°C
	7		Temperature	Temp.: 20°C; Time:00:10

## Sheet: Acquired Data 1
Data step:	4			Show channel:	Thresholds:
Sample Group:	Default		Ch 1	No
Method:	Threshold		Ch 2	No
Smoothing:	ON		Ch 3	No
Smoothing window:	5		Ch 4	No
Baseline:	Trend		Ch 5	Yes	104.74
Baseline range start:	3
Baseline range end:	7
Channel	Cycle	Temp	A1	A2	A3	A4	A5	A6	A7	A8	A9	A10	A11	A12	A13	A14	A15	A16	B1	B2	B3	B4	B5	B6	B7	B8
5	1	60	-0.96	-4.24	-2.01	-3.87	-1.98	-2.2	-4.22	-2.86	-4.41	-4.39	-2.97	-1.85	-1.17	-3.78	-2.29	26.11	-5.1	-2.97	-2.98	-1.14	-3.02	-3.37	-1.18	-1.39
5	2	60	-1.19	0.06	0.41	1.25	0.25	0.44	0.42	1.2	0.89	-0.58	0.7	0.64	0.76	0.2	0.31	26	-1.05	0.49	0.27	0.68	0.17	0.9	0.61	1.02
5	3	60	-1.35	1.98	1.27	3	1.23	1.23	2.41	2.51	2.79	1.25	2.23	1.41	1.2	1.98	1.03	25.14	1.17	1.85	1.64	1.09	1.57	2.32	1.25	1.75
5	4	60	-1.65	1.17	-0.05	0.16	0.5	-0.67	0.64	0.03	-0.03	0.85	1.17	-0.39	-0.49	0.11	-0.86	23.45	0.83	0.65	0.88	-0.72	1.28	0.08	0.25	0.77
5	5	60	-2.33	-1.9	-1.52	-2.35	-0.63	-2.16	-1.42	-2.25	-2.45	-1.75	-1.62	-1.48	-1.83	-0.76	-1.84	20.45	0.11	-1.47	-1.03	-2.27	-2.24	-2.22	-1.35	-2.22
5	6	60	2.16	0.5	1.54	0	1.37	0.89	0.51	0.48	0.53	1.64	1.05	1.02	0.75	1.85	1.08	19.93	3.14	1.87	1.63	0.84	1.17	1.8	1.44	0.34
5	7	60	5.47	3.47	4.19	2.63	3.04	3.84	3.27	3.91	4.24	5	3.82	3.76	3.6	4.27	4.53	20.17	4.14	2.91	3.78	3.24	2.74	3.87	2.19	1.49
5	8	60	5.37	3.91	2.84	3.08	2.25	3.74	3.83	2.95	4.31	5	3.36	2.82	2.52	3.32	3.47	17.47	3.75	1.82	2.47	3.99	2.77	2.81	1.54	1.55
5	9	60	1.53	0.34	-1.76	-0.03	-1.83	0.26	-0.02	-1.67	-0.1	0.44	-1.49	-1.2	-1.14	-1	-0.05	12.62	-0.8	-1.87	-2.26	-0.6	-0.09	-1.59	-2.41	-1.44
5	10	60	-1.35	-1.16	-3.16	-1.25	-2.71	-1.51	-2.05	-4.04	-2.03	-2.29	-3.66	-2.48	-3.16	-2.98	-1.87	9.65	-1.24	-1.45	-2.97	-2.28	-0.83	-2.1	-2.83	-0.8
5	11	60	-1.94	-1.51	-2.81	-1.75	-2.43	-2.43	-2.27	-2.08	-2.22	-2.58	-3.64	-2.91	-2.75	-2.74	-2.51	8.23	-2.06	-2.03	-2.45	-3.28	-1.34	-2.46	-2.33	-1.54
5	12	60	-2.41	-2.32	-1.49	-0.78	-1.86	-1.77	-1.7	-0.83	-1.5	-2.01	-2.52	-2.3	-1.11	-2.01	-2.25	5.9	-1.09	-1.51	-1.18	-2.17	-2.54	-1.7	0.05	-1.49
5	13	60	-0.87	-1.31	-0.8	-1.38	-0.85	-1.99	-0.52	0.29	-1.72	-1.25	-1.56	-1.06	-0.2	-0.97	-0.71	4.85	-1.87	-0.99	-0.99	-1.51	-2.09	-1.81	0.1	-2.2
5	14	60	0.11	0.32	0.92	-0.28	0.64	0.24	-0.12	0.76	0.19	-0.03	0.61	1.62	1.09	0.31	1.16	4.72	-0.56	0.82	0.68	0.94	-0.42	0.84	0.78	0.63
5	15	60	-0.46	1.05	1.3	1.58	2.06	1.34	1.23	1.62	1.51	0.68	2.11	1.62	0.74	0.53	0.81	2.78	0.65	1.88	2.51	3.2	2.87	2.63	1.9	3.52
5	16	60	-0.11	-0.37	1.14	2.27	0.95	0.76	2.23	1.43	1.19	1.36	2.43	0.76	1.19	1.66	1.08	-0.07	3.44	2.42	3.26	3.99	4.59	2.51	3.78	6.43
5	17	60	-1.12	-3.56	-2.44	0.67	-1.74	-1.78	3.75	2.77	1.74	1.22	0.82	-0.76	-0.36	1.1	0.72	-5.34	5.05	4.79	1.76	5.2	5.21	2.86	5.78	8.02
5	18	60	5.07	2.36	3.38	9.29	3.53	4.68	17.01	16.46	16.95	11.7	11.67	8.75	9.59	10.48	9.87	-3.38	17.97	19.77	10.15	20.38	18.72	17.71	20.98	24.64
5	19	60	14.7	13.34	14.29	24.84	16.42	17.15	44.47	41.08	44.35	31.43	33.01	25.78	28.51	29.49	25.23	1.83	43.01	47.27	30.31	49.69	47.8	44.9	50.77	58.93
5	20	60	31.44	27.72	29.08	48.58	35.59	33.7	89.78	82.53	87.14	62.14	68.21	53.23	61.72	62.69	50.51	6.97	89	91.99	64.08	97.8	97.08	90.19	101.68	118.31
5	21	60	47.15	42.73	44.69	78.18	57.33	52.51	154.93	144.56	148.83	104.02	114.24	88.8	105.76	106.98	86.28	2.21	155.1	160.38	110	170.09	168.52	155.09	177.14	206.66
5	22	60	91.75	83.88	83.01	144.82	108.17	96.36	285.86	266.17	273.46	189.98	206.49	162.44	192.33	197.73	160.75	0.93	280.5	294.06	197.42	303.92	304.74	280.27	314.87	366.47
5	23	60	162.74	150.52	146.47	251.78	187.79	167.1	468.17	433.59	445.17	315.93	338.95	264.31	321.1	332.3	270.07	-0.29	453.66	480.92	320.46	482.77	490.26	448.48	494.51	574.46
5	24	60	288.77	263.42	255.87	420.04	312.8	282.16	688.12	637.31	652.78	479.13	513.13	395.99	498.99	518.48	420.6	0.42	669.39	713.22	471.53	693.72	709.12	646.9	699.2	802.45
5	25	60	471.34	433.39	416.92	626.69	466.46	421.77	880.95	824.53	838.06	635.14	683.84	522.26	684.65	710.4	580.16	-1.12	868.9	928.26	608.41	877.49	898.58	821.4	872	991.06
5	26	60	694.2	642.6	613.37	828.77	621.17	552.06	1023.8	965.3	978.42	759.21	818.57	624.97	835.39	873.78	718.13	-0.15	1021.18	1091.99	710.68	1007.57	1036.35	949.38	994.38	1122.69
5	27	60	899.67	843.62	798.35	980.16	732.25	638.6	1100.92	1044.65	1058.15	837.47	903.82	687.96	930.18	978.46	806.07	0.72	1110.3	1187.32	772.08	1077.18	1111.7	1018.56	1060.06	1194.39
5	28	60	1040.28	981.28	925.75	1067.6	793.46	691.32	1140.91	1079.87	1097.62	875.7	947.59	723.12	978.15	1033.91	851.82	0.07	1155.08	1237.75	805.49	1111.63	1144.5	1048.04	1090.37	1227.57
5	29	60	1114.63	1054.5	991.51	1108.73	820.48	723.42	1152.82	1090.46	1111.69	889.63	966.71	735.4	1002.29	1054.07	870.14	-2.8	1169.37	1256.84	817.97	1122.12	1154.79	1058.26	1099.44	1236.79
5	30	60	1143.81	1081.3	1016.44	1117.3	832.91	741.74	1151.28	1086.77	1110.05	890.37	966.12	733.95	1005.76	1055.84	873.84	-3.76	1167.48	1254.96	814.17	1115.52	1153.01	1053.72	1091.82	1232.03
5	31	60	1170.55	1110.78	1037.96	1133.42	851.51	763.57	1162.48	1096.51	1121.21	904.17	975.45	743.87	1018.7	1067.33	884.99	1.14	1178.46	1264.13	819.8	1121.86	1167.68	1064.96	1098.78	1238.48
5	32	60	1183.42	1125.13	1050.44	1141.14	859.97	780.3	1168.34	1101.83	1128.05	908.38	981.23	754.57	1024.33	1070.69	890.46	9.16	1184.06	1269.37	824.6	1126.32	1171.28	1069.43	1101.84	1242.8
5	33	60	1174.05	1118.04	1042.96	1129.84	851.2	780.89	1151.83	1089.15	1117.89	899.1	974.51	749.24	1015.03	1059.66	882.37	15.17	1169.62	1255	817.69	1116.68	1156.81	1056.64	1092.34	1230.36
5	34	60	1157.54	1101.26	1027.38	1109.49	836.22	774.5	1130.57	1069.82	1101.1	885.14	963.27	735.83	997.93	1041.36	867.73	29.55	1151.72	1235.74	803.96	1100.15	1138.92	1036.82	1074.92	1212.54
5	35	60	1159	1101.39	1024.81	1108.28	837.94	781.47	1133.76	1067.64	1100.56	884	961.17	735.26	995.97	1041.33	869.93	57.07	1151.62	1237.74	802.79	1097.39	1140.38	1036.52	1075.65	1212.64
5	36	60	1168.13	1108.6	1033.33	1116.73	843.66	791.01	1141.73	1076.64	1108.38	890.58	967.63	740.87	1005.61	1048.64	878.55	98.01	1157.4	1247.5	808.52	1103.73	1145.7	1044.12	1080.32	1218.04
5	37	60	1154.65	1099.35	1024.03	1105.81	833.73	785.16	1128.96	1066.84	1096.67	882.29	958.03	735.05	996.42	1039.76	869.85	134.55	1144.88	1233.88	799.85	1093.6	1132.32	1034.26	1068.59	1205.18
5	38	60	1142.31	1087.27	1012.38	1091.52	821.95	778.96	1113.03	1055.76	1085.12	873.53	950.72	728.32	987.26	1029.86	857.3	167.04	1133.15	1219.15	789.83	1083.02	1122.56	1024.18	1058.35	1191.44
5	39	60	1149.76	1092.06	1015.85	1095.65	826.57	783.85	1116.4	1059.23	1087.12	877.83	953.69	731.61	990.88	1033.74	859.74	190.16	1138.46	1224.79	793.06	1089.29	1127.82	1027.05	1060.62	1196.09
5	40	60	1172.86	1108.95	1030.25	1112.86	843.5	797.44	1134.03	1073.4	1099.35	891.59	964.81	742.65	1004.14	1048.39	873.1	205.37	1156.76	1245.71	805.96	1107.93	1145.14	1039.56	1073.21	1215.15

## Sheet: Cq Results
Data step:	4			Show channel:	Thresholds:
Sample Group:	Default		Ch 1	No
Method:	Threshold		Ch 2	No
Smoothing:	ON		Ch 3	No
Smoothing window:	5		Ch 4	No
Baseline:	Trend		Ch 5	Yes	104.74
Baseline range start:	3
Baseline range end:	7
Well	Replicate	Fluorophore	Sample Type	Sample Name	Target	Cq	Quantity	Omitted	Description
A01-Ch5		SYBR	Unknown		GAPDH	22.18	NeuN
A02-Ch5		SYBR	Unknown		GAPDH	22.31	NeuN
A03-Ch5		SYBR	Unknown		GAPDH	22.34	NeuN
A04-Ch5		SYBR	Unknown		GAPDH	21.4	NeuN
A05-Ch5		SYBR	Unknown		GAPDH	21.93	NeuN
A06-Ch5		SYBR	Unknown		GAPDH	22.12	NeuN
A07-Ch5		SYBR	Unknown		GAPDH	20.23	NeuN
A08-Ch5		SYBR	Unknown		GAPDH	20.36	NeuN
A09-Ch5		SYBR	Unknown		GAPDH	20.29	NeuN
A10-Ch5		SYBR	Unknown		GAPDH	21.01	NeuN
A11-Ch5		SYBR	Unknown		GAPDH	20.79	NeuN
A12-Ch5		SYBR	Unknown		GAPDH	21.22	NeuN
A13-Ch5		SYBR	Unknown		GAPDH	20.98	NeuN
A14-Ch5		SYBR	Unknown		GAPDH	20.95	NeuN
A15-Ch5		SYBR	Unknown		GAPDH	21.25	NeuN
A16-Ch5		SYBR	NTC		GAPDH	36.18	0
B01-Ch5		SYBR	Unknown		GAPDH	20.24	NeuN
B02-Ch5		SYBR	Unknown		GAPDH	20.19	NeuN
B03-Ch5		SYBR	Unknown		GAPDH	20.89	NeuN
B04-Ch5		SYBR	Unknown		GAPDH	20.1	NeuN
B05-Ch5		SYBR	Unknown		GAPDH	20.11	NeuN
B06-Ch5		SYBR	Unknown		GAPDH	20.22	NeuN
B07-Ch5		SYBR	Unknown		GAPDH	20.04	NeuN
B08-Ch5		SYBR	Unknown		GAPDH	19.77	NeuN
B09-Ch5		SYBR	Unknown		GAPDH	20.02	NeuN
B10-Ch5		SYBR	Unknown		GAPDH	20.35	NeuN

## Sheet: Melt Curve Data
Sample Group:	Default		Show channel:
Smoothing:	ON		Ch 1	No
Smoothing window:	9		Ch 2	No
Low limit	63.5		Ch 3	Yes
High limit	91.5		Ch 4	No
Max # of peaks:	1		Ch 5	Yes
Peak threshold:	10
Slope Correction:	Yes
Derivative:	Negative
Temp	Channel	A1	A2	A3	A4	A5	A6	A7	A8	A9	A10	A11	A12	A13	A14	A15	A16	B1	B2	B3	B4	B5	B6	B7	B8	B9
60	3	41.07	27.07	12.61	14.91	31.65	28.31	13.3	30.37	27.86	66.73	192.28	28.03	16.36	14.98	38.17	23.47	25.79	27.54	34.17	24.87	30.5	10.3	20.21	18.97	10.77
60	5	1181.41	1126.68	1049.29	1130.98	842.59	804.4	1157.68	1106.87	1135.28	923	993.73	756.59	1024.52	1058.28	888.72	282.04	1182.01	1270.31	816.79	1125.97	1172.34	1061.02	1104.31	1237.43	1066.69
60.2	3	39.74	27.21	12.81	15.92	30.28	27.26	13.63	29.77	26.93	68.03	196.72	26.31	17.18	13.82	36.02	22.82	25.85	29.06	32.14	23.68	30.07	10.92	19.85	19.04	10.34
60.2	5	1216.15	1162.22	1078.25	1161.53	865.49	826.35	1190.74	1138.24	1167.4	950.73	1022.25	779.14	1054.78	1087.39	910.11	294.74	1216.17	1304.73	838.18	1159	1204.71	1091.14	1135.02	1270.55	1096.19
60.4	3	38.63	27.34	13.01	16.62	29	26.29	13.87	29.23	26.13	68.73	201.75	24.85	17.65	12.92	34.13	22.12	25.86	30.16	30.4	22.68	29.59	11.3	19.59	18.96	9.89
60.4	5	1245.39	1192.37	1103.13	1187.65	884.48	844.8	1218.97	1164.98	1195.06	974.37	1046.91	798.13	1080.74	1112.67	928.19	305.49	1245.23	1334.05	855.93	1186.98	1232.19	1117.07	1161.49	1298.89	1121.57
60.6	3	37.74	27.47	13.22	17.03	27.8	25.39	14.01	28.75	25.43	68.83	207.35	23.64	17.77	12.27	32.52	21.38	25.81	30.83	28.96	21.86	29.05	11.43	19.44	18.73	9.41
60.6	5	1269.14	1217.14	1123.95	1209.35	899.57	859.73	1242.36	1187.09	1218.25	993.93	1067.72	813.57	1102.41	1134.13	942.96	314.3	1269.18	1358.27	870.06	1209.93	1254.76	1138.79	1183.71	1322.46	1142.84
60.8	3	37.07	27.59	13.43	17.15	26.7	24.57	14.06	28.33	24.85	68.31	213.54	22.69	17.54	11.86	31.16	20.58	25.7	31.08	27.8	21.23	28.46	11.31	19.4	18.35	8.9
60.8	5	1287.4	1236.51	1140.69	1226.63	910.76	871.15	1260.92	1204.58	1236.98	1009.4	1084.69	825.46	1119.78	1151.77	954.41	321.15	1288.03	1377.38	880.55	1227.83	1272.42	1156.32	1201.69	1341.25	1160
61	3	37.72	28.53	14.89	16.96	26.21	24.34	13.41	27.4	25.26	67.57	223.96	22.31	15.96	12.62	31.43	20.16	24.88	31.51	27.37	20.87	27.53	10.56	19.59	17.73	7.92
61	5	1306.07	1255.15	1157.83	1243.84	921.57	883.36	1279.84	1221.79	1257.19	1025	1102.76	837.26	1136.83	1170.44	966.23	327.82	1306.6	1397.73	890.83	1245.56	1289.66	1174.82	1221.21	1361.29	1178.24
61.2	3	37.6	29.52	14.87	16.23	24.87	23.73	13.49	27.53	25.13	65.3	231.54	21.73	15.14	11.66	30.76	18.78	26.22	30.55	26.25	20.8	27.32	9.63	19.84	17.35	7.29
61.2	5	1319.78	1270.46	1173.43	1259.91	930.9	892.27	1296.42	1236.78	1273.73	1038.57	1119.45	847.54	1153.11	1188.33	976.91	333.74	1322.62	1414.14	898.51	1260.67	1304.68	1190.33	1237.75	1377.78	1194.48
61.4	3	36.76	28.11	14.36	15.32	23.99	22.66	13.3	26.53	23.5	63.43	236.64	21.16	15.31	11.95	27.6	18.53	27.3	30.09	25.42	20.57	25.96	9.23	20.69	17.59	8.44
61.4	5	1312.97	1266.56	1170.93	1256.57	924.99	887.31	1292.83	1233.52	1270.78	1034.91	1117.54	843.87	1151.05	1186.28	971.14	332.26	1318.56	1409.07	893.55	1256.74	1299.23	1188.7	1234.29	1374.49	1191.26
61.6	3	37	26.96	13.92	15.24	24.05	22.69	14.56	28.25	23.04	62.1	237.22	22.07	16.78	12.62	26.5	18.19	27.28	29.81	25.27	20.69	26.16	9.85	21.04	16.36	9.73
61.6	5	1294.44	1252.07	1157.27	1241.43	909.29	873.38	1276.47	1218.72	1255.69	1022.24	1103.71	830.42	1137.4	1172.59	956.09	325.41	1301.95	1390.43	880.47	1238.69	1282.33	1174.99	1219.57	1357.83	1176.16
61.8	3	38.25	25.67	12.86	14.96	23.48	22.74	14.72	28.18	22.39	59.48	229.41	22.07	17.62	13.39	25.05	16.9	26.16	29.34	24.86	21.48	26.53	10.85	21.24	16.76	9.93
61.8	5	1288.19	1249.11	1155.87	1238.53	903.35	866.59	1272.28	1214.93	1250.69	1020.7	1097.97	826.11	1133.94	1169.31	951.87	324.11	1297.61	1384.99	874.97	1234.82	1277.65	1172.07	1214.91	1352.29	1172.91
62	3	39.48	26.83	14.66	16.97	23.19	22.77	16.54	28.8	24.68	59.37	217.09	22.7	19.44	13.4	23.2	14.99	26.06	29.16	24.97	22.95	27.3	11.38	20.97	18.23	9.94
62	5	1278.8	1241.7	1150.51	1232.04	896.72	858.76	1264.6	1207.95	1242.79	1015.14	1090.59	820.35	1128.96	1163.43	944.09	322.22	1290.19	1375.53	868.57	1227.73	1268.5	1167.5	1206.69	1344.01	1167.54
62.2	3	40.74	26.89	16.37	18.11	23.35	22.73	16.64	29.01	25.77	59.06	198.89	22.59	19.42	14.23	24.36	15.95	26.7	30.54	24.44	24.44	28.82	13	22.32	20.03	11.01
62.2	5	1268.75	1231.49	1141.18	1223.39	887.21	850.59	1255.76	1198.26	1232.23	1008.04	1081.67	811.05	1119.89	1155.99	932.63	318.28	1279.83	1362.41	859.61	1219.68	1257.62	1161.05	1197.64	1334.49	1160.06
62.4	3	42.08	27.84	18.29	19.24	24.21	23.3	17.06	30.87	26.88	57.94	177.93	22.71	19.95	15.55	26.06	17.5	27.26	31.87	24.67	25.31	29.76	15.27	22.06	21.41	11.06
62.4	5	1260.99	1221.16	1134.74	1216.99	879.63	844.29	1247.3	1190.48	1225.52	1002.02	1074.5	803.53	1113.08	1149.49	925.53	315.82	1271.52	1352.77	851.25	1211.91	1248.51	1156.78	1190.92	1325.77	1153.93
62.6	3	40.69	29.22	19.19	19.42	23.98	22.43	17.81	31.53	27.66	56.15	156.83	22.51	18.95	16.79	28.72	17.19	27.02	32.02	25.44	26.63	30.34	15.57	21.84	21.59	10.39
62.6	5	1253.73	1211.77	1127.66	1211.32	871.79	837.9	1239.19	1183.45	1218.15	995.49	1066.57	796.09	1106.66	1144.01	919.16	312.89	1264.41	1344.44	843.64	1205.71	1240.8	1151.5	1183.18	1316.79	1148.31
62.8	3	38.02	29.66	18.94	18.24	22.8	21.08	18.18	31.82	26.6	53.77	135.23	21.52	17.54	17.33	28.87	15.37	28.3	31.41	24.68	26.69	30.17	15.73	22.96	21.16	11.09
62.8	5	1249.61	1208.09	1123.67	1208.1	867.29	833.1	1236.24	1177.82	1212.45	992.4	1062.03	791.35	1104.45	1140.67	913.77	310.73	1261.03	1339.88	838.09	1202.84	1236.53	1148.09	1179.08	1310.66	1146.4
63	3	37.26	30.44	18.22	18.73	22.18	20.25	18.91	31.78	25.75	51.89	118.09	21.12	17.72	17.51	27.65	14.16	28.93	31.12	24.62	25.98	29.92	15.91	23.16	20.66	11.57
63	5	1243.21	1202	1119.22	1200.7	861.45	827.02	1229.98	1171.4	1205.51	987.99	1055.39	785.67	1099.66	1135.65	905.35	308.08	1254.15	1331.53	832.42	1198.05	1228.53	1144.27	1172.69	1303.3	1141.2
63.2	3	36.17	31.02	18.29	20.04	21.29	20.04	18.76	32.48	24.73	49.63	105.49	20.83	19	18.39	27.34	14.93	29.38	31.48	24.3	26.82	29.43	17.27	23.06	19.18	13.22
63.2	5	1237.15	1196.8	1115.94	1194.85	855.2	820.62	1225.01	1164.94	1199.28	982.7	1048.84	780.84	1094.65	1131.62	899.54	304.94	1249.07	1323.91	827.11	1192.25	1222.68	1140.45	1167.19	1295.61	1137.39
63.4	3	36.37	31.13	17.54	20.53	21.1	20.21	19.34	32.91	25.5	46.01	95.01	19.74	20.41	19.37	27.48	14.78	29.91	31.77	23.59	27.05	28.42	17.3	22.95	19.49	14.27
63.4	5	1232.63	1193.46	1115.43	1190.26	850.81	815.52	1222.82	1160.36	1195.45	980.12	1044.41	778.22	1091.18	1129.94	895.14	303.87	1245.87	1318.49	822.46	1188.51	1217.37	1137.9	1163.07	1289.96	1136.44
63.6	3	36.57	31.85	18.3	21.16	20.93	19.42	20.54	33.53	27.32	45.6	88.24	18.95	22.44	19.29	25.26	15.98	31.1	31.68	23.04	27.5	27.77	18.12	23.76	20.73	16.05
63.6	5	1227	1187.77	1112.75	1184.01	846.22	809.79	1218.8	1153.89	1190.8	975.01	1037.87	772.91	1086.59	1126.8	888.89	302.6	1239.6	1311.48	817.86	1181.63	1208.76	1134.37	1158.3	1282.22	1133.78
63.8	3	37.15	31.21	19.25	21.62	21.54	19.97	20.06	33.62	26.84	43.68	82.1	18.64	22.77	19.24	25.72	17.94	30.87	32.78	22.6	26.02	28.02	19.45	24.1	21.43	17.08
63.8	5	1219.81	1181.15	1109.61	1179.13	840.52	805.46	1215.33	1147.31	1185.76	969.36	1033.46	769.05	1082.05	1123.57	883.65	300.85	1232.68	1302.53	813.03	1175.16	1201.13	1131.42	1153.05	1275.96	1130.57
64	3	37.71	30.76	20.75	21.33	21.4	19.42	19.68	33.65	26.78	41.95	77.18	19.22	22.49	19.46	26.16	18.08	30.77	33.57	23.52	26.15	28.93	20.15	23.46	22.23	16.43
64	5	1211.08	1172.01	1104.77	1172.04	834.49	800.64	1209.71	1140.04	1179.75	962.7	1027.21	763.67	1076.97	1117.49	878.27	298.91	1226.1	1292.73	807.8	1164.91	1192.01	1126.52	1145.16	1268.2	1125.19
64.2	3	37.47	30.54	22.47	21.82	21.97	19.5	20.5	33.65	26.17	41.08	73.41	19.78	22.67	19.06	25.84	18.42	31.47	34.51	23.16	26.41	28.6	20.6	23.35	22.95	16.59
64.2	5	1201.9	1163.91	1098.92	1164.98	826.89	794.89	1201.88	1133.08	1172.38	955.01	1019.7	758.62	1070.55	1112.59	872.55	296	1219.05	1282.18	801.02	1157.26	1183.32	1120.13	1136.52	1258.86	1119.3

## Sheet: Melting curve Results
Sample Group:	Default		Show channel:
Smoothing:	ON		Ch 1	No
Smoothing window:	9		Ch 2	No
Low limit	63.5		Ch 3	Yes
High limit	91.5		Ch 4	No
Max # of peaks:	1		Ch 5	Yes
Peak threshold:	10
Slope Correction:	Yes
Derivative:	Negative
Well	Replicate	Fluorophore	Sample Type	Sample Name	Target	Melt Temp 1	Peak Height 1	FW/HM Peak 1	Area Peak 1	Melt Temp 2	Peak Height 2	FW/HM Peak 2	Area Peak 2	Melt Temp 3	Peak Height 3	FW/HM Peak 3	Area Peak 3	Melt Temp 4	Peak Height 4	FW/HM Peak 4	Area Peak 4	Description
A01-Ch3		ROX	Unknown		GAPDH	91.05	42.657095268969	0.370563719683885	16.824927393163	0	0	0	0	0	0	0	0	0	0	0	0
A01-Ch5		SYBR	Unknown		GAPDH	80.58	572.877609425141	1.8959709435344	1156.09240608207	0	0	0	0	0	0	0	0	0	0	0	0
A02-Ch3		ROX	Unknown		GAPDH	90.2	41.1039020261759	0.0294375449180603	8.2207804052353	0	0	0	0	0	0	0	0	0	0	0	0
A02-Ch5		SYBR	Unknown		GAPDH	80.55	538.744617706119	1.91781454618739	1099.73633797611	0	0	0	0	0	0	0	0	0	0	0	0
A03-Ch3		ROX	Unknown		GAPDH	77.41	18.8121138993368	0.241719579219818	4.89087737444623	0	0	0	0	0	0	0	0	0	0	0	0
A03-Ch5		SYBR	Unknown		GAPDH	80.4999999999999	500.631193000005	1.86928409539901	996.075457144362	0	0	0	0	0	0	0	0	0	0	0	0
A04-Ch3		ROX	Unknown		GAPDH	84.3000000000001	23.0370428946604	0.413172132629156	10.1310989172212	0	0	0	0	0	0	0	0	0	0	0	0
A04-Ch5		SYBR	Unknown		GAPDH	80.43	564.527528244951	1.84622223454553	1109.3488158403	0	0	0	0	0	0	0	0	0	0	0	0
A05-Ch3		ROX	Unknown		GAPDH	91.02	67.3432523558564	0.215635212421417	15.8558146293757	0	0	0	0	0	0	0	0	0	0	0	0
A05-Ch5		SYBR	Unknown		GAPDH	80.2799999999999	447.565183710159	1.7198454301059	819.303357651948	0	0	0	0	0	0	0	0	0	0	0	0
A06-Ch3		ROX	Unknown		GAPDH	85.98	66.8713702060577	0.235175646686554	16.9365321934505	0	0	0	0	0	0	0	0	0	0	0	0
A06-Ch5		SYBR	Unknown		GAPDH	80.2599999999999	425.319790796488	1.73631997633099	786.039509780765	0	0	0	0	0	0	0	0	0	0	0	0
A07-Ch3		ROX	Unknown		GAPDH	80.02	23.2467129780365	0.175079594135284	4.79043739770006	0	0	0	0	0	0	0	0	0	0	0	0
A07-Ch5		SYBR	Unknown		GAPDH	80.46	564.936531684255	1.89247028593419	1137.96197758703	0	0	0	0	0	0	0	0	0	0	0	0
A08-Ch3		ROX	Unknown		GAPDH	72.27	150.703499558265	0.592549392025173	95.0488610040623	0	0	0	0	0	0	0	0	0	0	0	0
A08-Ch5		SYBR	Unknown		GAPDH	80.4899999999999	533.32794534353	1.86678368735605	1059.71079982487	0	0	0	0	0	0	0	0	0	0	0	0
A09-Ch3		ROX	Unknown		GAPDH	86.11	53.5264816512524	0.305703003537655	17.4086557971278	0	0	0	0	0	0	0	0	0	0	0	0
A09-Ch5		SYBR	Unknown		GAPDH	80.4899999999999	538.109670151694	1.91674220268277	1097.82603170856	0	0	0	0	0	0	0	0	0	0	0	0
A10-Ch3		ROX	Unknown		GAPDH	88.63	197.904381361864	0.304222796237469	64.1034707520845	0	0	0	0	0	0	0	0	0	0	0	0
A10-Ch5		SYBR	Unknown		GAPDH	80.41	480.51924257354	1.75205501997017	896.102206691568	0	0	0	0	0	0	0	0	0	0	0	0
A11-Ch3		ROX	Unknown		GAPDH	88.52	722.327932780773	0.361693466770649	278.078819223523	0	0	0	0	0	0	0	0	0	0	0	0
A11-Ch5		SYBR	Unknown		GAPDH	80.4899999999999	506.227347207631	1.77835290614998	958.214138101234	0	0	0	0	0	0	0	0	0	0	0	0
A12-Ch3		ROX	Unknown		GAPDH	91.2	45.3001360733934	0.0294375449180603	9.06002721467882	0	0	0	0	0	0	0	0	0	0	0	0
A12-Ch5		SYBR	Unknown		GAPDH	80.42	391.199143198665	1.79592483449613	747.799333375059	0	0	0	0	0	0	0	0	0	0	0	0
A13-Ch3		ROX	Unknown		GAPDH	80.78	31.7769545023208	0.180931968212128	6.65755443920691	0	0	0	0	0	0	0	0	0	0	0	0
