# Supplementary material for: Genome-wide identification of gene families related to miRNA biogenesis in Mangifera indica L. and their possible role during heat stress
Source: PeerJ. 2024 Jul 17;12:e17737. doi: 10.7717/peerj.17737 (PMC11260077; doi:10.7717/peerj.17737)
Supplement: Supplemental Information 16 [file peerj-12-17737-s016.xlsx]

## Sheet: General Info
General Info
Ord File Name	C:\Users\Propietario\Documents\Andrés\Corrida final controles DCL1 13 de julio 2018.ord
Software Version	2.2.250.602
Instrument Name	PR0961400539
Instrument Serial	PR0961400539
Instrument Version	PCR 2.3.2, RT 1.1.12.23
Used Data Step	1
Sample Group	Default
Protocol Log	StartTime: 13/07/2018 11:52:48 a.m.
	RunTime: 01:21:29
	Path: /SHARED/PCPTP
	No errors

## Sheet: Plate
Well	Fluorophore	Sample Type	Target	Description	Quantity	AD Std Value	Replicate	Sample Name		Sample Group	Default
A01-Ch1	[none]	[none]			0						A1
A01-Ch2	[none]	[none]			0						A2
A01-Ch3	ROX	Unknown	DCL1		0						A3
A01-Ch4	[none]	[none]			0						A4
A01-Ch5	SYBR	Unknown	DCL1		0						A5
A02-Ch1	[none]	[none]			0						A6
A02-Ch2	[none]	[none]			0						A7
A02-Ch3	ROX	Unknown	DCL1		0						A8
A02-Ch4	[none]	[none]			0						A9
A02-Ch5	SYBR	Unknown	DCL1		0						A10
A03-Ch1	[none]	[none]			0						A11
A03-Ch2	[none]	[none]			0						A12
A03-Ch3	ROX	Unknown	DCL1		0						A13
A03-Ch4	[none]	[none]			0						A14
A03-Ch5	SYBR	Unknown	DCL1		0						A15
A04-Ch1	[none]	[none]			0						A16
A04-Ch2	[none]	[none]			0						B1
A04-Ch3	ROX	Unknown	DCL1		0						B2
A04-Ch4	[none]	[none]			0						B3
A04-Ch5	SYBR	Unknown	DCL1		0						B4
A05-Ch1	[none]	[none]			0						B5
A05-Ch2	[none]	[none]			0						B6
A05-Ch3	ROX	Unknown	DCL1		0						B7
A05-Ch4	[none]	[none]			0						B8
A05-Ch5	SYBR	Unknown	DCL1		0						B9
A06-Ch1	[none]	[none]			0						B10
A06-Ch2	[none]	[none]			0						B11
A06-Ch3	ROX	Unknown	DCL1		0						B12
A06-Ch4	[none]	[none]			0						B13
A06-Ch5	SYBR	Unknown	DCL1		0						B14
A07-Ch1	[none]	[none]			0						B15
A07-Ch2	[none]	[none]			0						B16
A07-Ch3	ROX	Unknown	DCL1		0						C1
A07-Ch4	[none]	[none]			0						C2
A07-Ch5	SYBR	Unknown	DCL1		0						C3
A08-Ch1	[none]	[none]			0						C4
A08-Ch2	[none]	[none]			0						C5
A08-Ch3	ROX	Unknown	DCL1		0						C6
A08-Ch4	[none]	[none]			0						C7
A08-Ch5	SYBR	Unknown	DCL1		0						C8
A09-Ch1	[none]	[none]			0						C9
A09-Ch2	[none]	[none]			0						C10
A09-Ch3	ROX	Unknown	DCL1		0						C11
A09-Ch4	[none]	[none]			0						C12
A09-Ch5	SYBR	Unknown	DCL1		0						C13
A10-Ch1	[none]	[none]			0						C14
A10-Ch2	[none]	[none]			0						C15
A10-Ch3	ROX	Unknown	DCL1		0						C16
A10-Ch4	[none]	[none]			0						D1
A10-Ch5	SYBR	Unknown	DCL1		0						D2
A11-Ch1	[none]	[none]			0						D3
A11-Ch2	[none]	[none]			0						D4
A11-Ch3	ROX	Unknown	DCL1		0						D5
A11-Ch4	[none]	[none]			0						D6

## Sheet: Protocol
Reaction volume	10		Channel in use:
Consumable	1		Ch 1	No
Ramp rate	7		Ch 2	No
Heated lid ON	True		Ch 3	Yes (ROX)
Heated lid temperature	105		Ch 4	No
			Ch 5	Yes (SYBR)
	No	Cycle	Type	Information
	1		Temperature	Temp.: 95°C; Time:07:00
	2		Cycle	Number of cycles to loop:40; Number of steps inside loop:2
	3	*	. Temperature	Temp.: 95°C; Time:00:05
DA	4	*	. Temperature	Temp.: 60°C; Time:00:30; Data acquisition:True
	5		Temperature	Temp.: 60°C; Time:00:30
	6		Melting Curve	Start temperature:60°C; End temperature:95°C; Hold time:00:01; Temperature increment after hold:0.2°C
	7		Temperature	Temp.: 20°C; Time:00:10

## Sheet: Acquired Data 1
Data step:	4			Show channel:	Thresholds:
Sample Group:	Default		Ch 1	No
Method:	Threshold		Ch 2	No
Smoothing:	ON		Ch 3	No
Smoothing window:	5		Ch 4	No
Baseline:	Trend		Ch 5	Yes	102.81
Baseline range start:	3
Baseline range end:	7
Channel	Cycle	Temp	A1	A2	A3	A4	A5	A6	A7	A8	A9	A10	A11	A12	A13	A14	A15	A16	B1	B2	B3	B4	B5	B6	B7	B8
5	1	60	1.28	0.53	1.59	1.47	0.87	2.33	0.06	1.24	4.08	1.04	4.2	3.11	1.12	0.75	-12.39	-10.81	-0.2	2.47	0.84	0.56	1.63	1.38	0.16	2.2
5	2	60	0.98	-0.23	1.21	0.6	1	0.58	-0.5	-0.49	0.42	0.39	1.17	0.51	0.47	1.02	-15.31	-13.54	-0.08	1.63	-0.16	0.13	0.87	0.39	0.13	0.85
5	3	60	0.12	-0.78	0.32	0.02	0.55	-0.52	-1.08	-1.39	-1.88	-0.34	-0.82	-0.94	-0.65	0.79	-16.95	-14.89	-0.15	0.55	-0.87	-0.65	-0.26	-0.58	-0.37	-0.53
5	4	60	-1.06	-1.12	-1.39	-0.12	-0.57	-1.62	-1.92	-1.25	-2.5	-1.36	-1.79	-0.72	-2.96	0.22	-17.59	-14.06	-0.55	-1.39	-0.94	-1.44	-2.06	-1.69	-1.62	-2.18
5	5	60	-1.67	-1.12	-1.58	-0.63	-0.41	-0.01	-1.28	-0.25	-1.71	-1.05	-1.05	0.05	-2.21	-1.02	-15.51	-13.47	0.82	-1.37	0.26	-1.48	-1.41	-1.11	-0.5	-1.15
5	6	60	-0.28	1.2	0.31	1.02	1.59	1.91	1.42	2.59	1.7	2.43	1.35	1.87	2.74	0.71	-11.27	-11.05	1.07	1.24	1.51	0.96	1.88	0.71	1.33	1.16
5	7	60	1.82	2.34	0.07	0.28	1.42	0.94	1.53	1.42	2.76	2.24	0.83	1.31	2.82	0.58	-10.08	-11.82	-0.39	1.24	1.26	1.78	1.8	1.45	1.82	1.11
5	8	60	-0.33	-0.26	-2.18	-1.91	-2.1	-1.85	-0.91	-1.95	-0.25	-0.53	-1.89	-2.68	-1.18	-2.37	-12.48	-15.92	-2.95	-1.99	-2.25	-1.91	-1.97	-1.53	-1.2	-1.96
5	9	60	-0.64	-0.83	-0.77	-2.3	-2.19	-1.78	-1.28	-2.42	-0.79	-1.85	-2.35	-4.03	-1.81	-3.23	-11.74	-14.86	-1.56	-3.26	-1.88	-2.23	-2.17	-0.97	-0.68	-1.46
5	10	60	-0.23	0.26	1.33	-1.07	-1.27	-0.66	-0.28	-1.57	-1.31	-0.76	-1.12	-2.1	0.3	-1.54	-11.6	-9.44	-0.31	-1.51	-0.4	-1.42	-0.74	-0.4	0.54	-0.29
5	11	60	-1.86	-1.06	-0.6	-2.45	-2.78	-1.76	-1.49	-2.17	-3.15	-2.66	-1.78	-3.21	-0.79	-1.43	-11.22	-5.24	-1.59	-2.71	-1.83	-2.88	-1.86	-1.89	-1.23	-2.48
5	12	60	-0.72	-1.17	-0.38	-1.25	-0.64	-0.98	0.74	0.41	-2.02	-1.55	-0.19	-1.16	0.21	-0.11	-7.96	-2.14	0.28	-0.88	-0.62	-1.14	0.18	-0.95	-1.02	-1.56
5	13	60	0.02	-0.41	0	1.17	0.5	0.04	1.54	2.12	-0.02	-0.07	0.1	0.17	0.94	1.28	-3.18	-1.14	1.42	-0.09	1.74	1.53	1.05	0.48	-0.45	0.69
5	14	60	1.32	1	1.56	3.07	1.18	1.54	2.52	2.68	1.86	1.77	0.81	3.03	0.78	2.15	-1.36	-0.52	2.36	2.05	3.12	3.59	0.94	1.98	1.15	2.84
5	15	60	-1.48	-0.82	-1.15	0.53	-1.59	-0.54	-0.2	0.22	-0.36	-0.17	-1.89	-0.41	-1.13	-0.69	-2.62	-1.26	0.21	-1.7	-0.43	0.68	-2.21	-0.8	-1.02	0.63
5	16	60	-0.39	0.45	0.32	1.26	0.11	-0.1	1.45	1	-0.23	0.74	-0.46	0.46	-0.14	0.31	-0.68	0.41	1.82	0.32	0.33	1.65	-0.25	0.44	0.89	1.15
5	17	60	0.57	2.39	1.09	2.23	1.48	0.45	1.87	1.78	-0.46	1.39	0.81	2.1	0.84	2.6	0.58	0.95	3.15	0.96	1.68	2.67	2.25	1.19	2.21	1.35
5	18	60	3.11	3.2	2.44	3.06	2.48	2.79	3.41	3.15	2.57	2.1	2.86	4.39	2.9	3.94	1.4	1.89	3.03	3.9	2.54	4.6	3.88	3.59	4.09	2.5
5	19	60	2.13	1.68	1.05	0.37	2.55	1.57	3.04	1.92	3.45	0.92	2.11	2.82	2.51	1.19	0.18	1.31	1.45	2.76	0.73	3.81	3.7	3.49	1.69	2.13
5	20	60	-0.19	-1.05	-0.85	-1.88	0.39	-0.65	0.51	-0.46	1.11	-0.37	0.3	0	0.13	-1.59	-0.91	-0.29	-1.22	1.97	-0.28	1.08	0.38	1.32	-0.64	0.42
5	21	60	-1.22	-1.77	-1.26	-2.19	-0.59	-1.63	-1.59	-2.07	-1	-0.9	-0.67	-1.39	-2.67	-2.03	-1.28	-1.63	-2.19	-0.28	-1.75	-1.57	-1.9	-1.21	-2.49	-1.84
5	22	60	-0.75	-1.73	-1.6	-1.72	-1.21	-0.78	-2.4	-2.48	-0.68	-1.43	-0.71	-0.87	-1.79	-1.47	-0.56	-0.93	-2.89	-1.05	-1.72	-2.21	-2.63	-1.92	-1.79	-2.49
5	23	60	-0.09	-0.7	-1.22	-1.46	0.23	-0.54	-1.95	-2.44	-0.92	-0.65	-0.03	-0.49	-0.44	-0.03	0.64	-1.27	-1.55	-1.68	-0.94	-0.94	-0.47	-0.87	-0.99	-1.07
5	24	60	-0.45	0.65	-0.52	-0.75	-0.28	-0.21	-2.45	-1.31	-1.42	-0.11	-0.2	-0.6	0.03	1.06	0.13	-0.44	-0.91	-1.18	0.07	-1.2	0.18	-0.67	0.83	-0.29
5	25	60	1.79	3.49	2.22	0.75	-0.04	1.46	-1.06	0.84	0.1	0.77	0.33	-0.49	-0.01	3.94	1.12	0.81	1.3	0.8	1.35	-0.85	-0.31	-0.37	3.18	3.09
5	26	60	3.93	7.68	3.06	1.91	-0.69	1.99	0.31	0.87	0.64	0.84	0.1	-0.74	1.36	6.94	0.34	1.65	3.93	3.67	2.56	-0.53	0.02	-0.51	6.59	6.78
5	27	60	9.41	14.52	4.82	2.72	1.43	3.24	1.6	1.6	0.1	1.25	0.86	0.91	5.51	13.41	0	-0.68	9.45	8.09	5.55	-1.32	-0.55	-0.94	12.16	12.31
5	28	60	20.67	28.41	11	5.07	4.53	7.1	3.79	4.69	2.95	3.42	4.1	4.53	15.49	25.32	-2.06	-1.82	18.81	15.47	7.62	-1.26	-0.55	-1.07	24.18	22.09
5	29	60	45.33	60.63	28.32	12.45	10.54	18.5	12.79	14.25	12.19	9.98	12.9	13.99	36.55	51.79	0.19	-0.39	41.93	33.02	17.1	0.56	2.7	1.68	49.87	46.96
5	30	60	89.64	118.53	59.79	27.91	22.09	39.55	29.88	30.55	29.22	22.43	30.03	29.76	76.63	98.47	0.91	1.79	85.24	67.45	37.96	4.17	10.72	7.35	98.36	96.26
5	31	60	171.85	218.63	118.67	59.76	48.62	80.22	63.19	62.78	59.39	44.93	62.21	59.79	147.24	178.31	2.29	3.54	161.13	132.57	77.36	10.18	22.8	17.71	184.79	182.57
5	32	60	304.88	367.89	217.11	115.35	96.82	151.22	121.75	119.27	113.78	84.88	117.98	114.64	257.17	288.74	1.24	5.77	277.89	242.34	143.94	21.66	43.36	35.96	313.8	313.24
5	33	60	504.21	575.91	386.18	229.33	195.25	286.64	239.01	235.32	222.36	163.62	232.81	224.15	418.82	430.22	7.09	16.4	451.03	427.43	273.61	53.97	92.98	79.87	500	503.32
5	34	60	705.96	768.17	586.74	393.31	343.55	468	403.05	396.5	376.82	262.03	402.03	382.59	582.59	550.55	11.41	26.46	622.01	646.97	446.89	105.79	173.89	149.77	678.58	689.47
5	35	60	866.98	906.43	774.59	595.21	541.86	664.78	594.51	582.11	556.48	360.68	609.78	570.65	709.43	637.09	15.13	36.45	751.58	852.32	630.35	191.61	303.21	259.08	808.41	830.98
5	36	60	957.02	971.11	897.98	773.54	737.3	816.02	758.03	733.98	709.4	433.43	798.82	738.22	775.28	681.23	13.28	43.64	817.58	986.86	774.51	315.8	472.74	402.12	868.48	902.9
5	37	60	1036.38	1033.9	998.43	928.9	922.53	937.84	897.69	862.19	839.75	496.63	966.46	883.24	832.43	731.11	17.69	61.01	878.38	1096.44	898.62	501.07	677.78	580.75	928.83	969.69
5	38	60	1085.87	1081.2	1064.26	1029.28	1049.32	1013.95	989.11	942.5	926.68	538.37	1075.87	980.8	874.09	765.76	22.8	78.68	920.26	1168.15	977.75	688	852.65	736.02	971.67	1014.29
5	39	60	1116.05	1106.16	1099.11	1086.72	1124.64	1055.15	1040.88	989.4	978.33	561.37	1137.95	1036.23	897.68	786.9	25.4	94.52	945.94	1210.09	1019.99	821.3	961.87	830.76	992.75	1039.77
5	40	60	1125.12	1111.78	1103.26	1100.27	1149.12	1060.31	1052.52	1000.93	994.31	565.7	1151.65	1049.7	904.48	795.17	26.67	109.47	955.62	1221.56	1024.43	916.49	1016.33	875.93	993.75	1046.31

## Sheet: Cq Results
Data step:	4			Show channel:	Thresholds:
Sample Group:	Default		Ch 1	No
Method:	Threshold		Ch 2	No
Smoothing:	ON		Ch 3	No
Smoothing window:	5		Ch 4	No
Baseline:	Trend		Ch 5	Yes	102.81
Baseline range start:	3
Baseline range end:	7
Well	Replicate	Fluorophore	Sample Type	Sample Name	Target	Cq	Quantity	Omitted	Description
A01-Ch5		SYBR	Unknown		DCL1	30.16	NeuN
A02-Ch5		SYBR	Unknown		DCL1	29.73	NeuN
A03-Ch5		SYBR	Unknown		DCL1	30.73	NeuN
A04-Ch5		SYBR	Unknown		DCL1	31.77	NeuN
A05-Ch5		SYBR	Unknown		DCL1	32.06	NeuN
A06-Ch5		SYBR	Unknown		DCL1	31.32	NeuN
A07-Ch5		SYBR	Unknown		DCL1	31.68	NeuN
A08-Ch5		SYBR	Unknown		DCL1	31.71	NeuN
A09-Ch5		SYBR	Unknown		DCL1	31.8	NeuN
A10-Ch5		SYBR	Unknown		DCL1	32.23	NeuN
A11-Ch5		SYBR	Unknown		DCL1	31.73	NeuN
A12-Ch5		SYBR	Unknown		DCL1	31.78	NeuN
A13-Ch5		SYBR	Unknown		DCL1	30.37	NeuN
A14-Ch5		SYBR	Unknown		DCL1	30.05	NeuN
A15-Ch5		SYBR	Unknown		DCL1	NeuN	NeuN
A16-Ch5		SYBR	NTC		DCL1	39.55	0
B01-Ch5		SYBR	Unknown		DCL1	30.23	NeuN
B02-Ch5		SYBR	Unknown		DCL1	30.54	NeuN
B03-Ch5		SYBR	Unknown		DCL1	31.38	NeuN
B04-Ch5		SYBR	Unknown		DCL1	33.94	NeuN
B05-Ch5		SYBR	Unknown		DCL1	33.12	NeuN
B06-Ch5		SYBR	Unknown		DCL1	33.33	NeuN
B07-Ch5		SYBR	Unknown		DCL1	30.05	NeuN
B08-Ch5		SYBR	Unknown		DCL1	30.08	NeuN
B09-Ch5		SYBR	Unknown		DCL1	30.38	NeuN
B10-Ch5		SYBR	Unknown		DCL1	30.35	NeuN

## Sheet: Melt Curve Data
Sample Group:	Default		Show channel:
Smoothing:	ON		Ch 1	No
Smoothing window:	9		Ch 2	No
Low limit	63.5		Ch 3	Yes
High limit	91.5		Ch 4	No
Max # of peaks:	1		Ch 5	Yes
Peak threshold:	10
Slope Correction:	Yes
Derivative:	Negative
Temp	Channel	A1	A2	A3	A4	A5	A6	A7	A8	A9	A10	A11	A12	A13	A14	A15	A16	B1	B2	B3	B4	B5	B6	B7	B8	B9
60	3	32.33	29.07	24.6	11.07	23.79	12.43	31.51	44.74	24.71	48.32	20.05	7.78	22.66	49.64	6.29	76.87	14.4	26.25	16.38	13.78	23.87	15.4	16.65	15.35	10.93
60	5	1202.96	1196.76	1185.38	1182.34	1235.1	1142.69	1136.49	1089.49	1075.66	615.49	1235.83	1134.95	984.78	837.82	49.48	96.01	1025.24	1295.26	1105.16	998.55	1095.91	957.05	1070.6	1118.85	1030.32
60.2	3	35.12	29.11	26.82	14.22	25.43	15.51	34.42	46.33	26.47	51.7	21.52	10.04	27.35	50.84	6.76	79.69	17.53	27.86	19.37	16.07	26.34	17.16	16.13	17.18	11.06
60.2	5	1201.36	1196.61	1185.02	1184.88	1234.09	1144.9	1136.97	1092.95	1072.85	613.16	1236.77	1134.77	987.38	833.46	50.44	94.93	1024.5	1294.42	1106.76	999.1	1097.93	957.81	1069.1	1120.31	1029.06
60.4	3	37.38	29.32	28.61	16.87	26.82	18.12	36.89	47.89	27.77	54.46	22.71	12.04	31.07	51.89	7.09	81.77	20.07	29.36	21.94	18.02	28.36	18.64	15.93	18.76	11.39
60.4	5	1198.41	1194.81	1183.18	1185.38	1231.63	1145.12	1135.92	1094.43	1068.62	610.08	1235.97	1133.12	988.33	828.15	50.84	93.73	1022.38	1291.98	1106.57	998.24	1097.84	957.27	1066.8	1120.01	1026.9
60.6	3	39.13	29.69	29.96	19.01	27.95	20.27	38.91	49.39	28.6	56.59	23.62	13.8	33.82	52.78	7.3	83.1	22.02	30.75	24.08	19.64	29.93	19.84	16.06	20.1	11.93
60.6	5	1194.09	1191.34	1179.87	1183.83	1227.71	1143.35	1133.35	1093.94	1062.97	606.25	1233.41	1130.01	987.62	821.89	50.67	92.41	1018.88	1287.95	1104.59	995.98	1095.64	955.43	1063.72	1117.96	1023.83
60.8	3	40.35	30.22	30.89	20.66	28.83	21.96	40.49	50.85	28.97	58.1	24.26	15.3	35.6	53.52	7.38	83.69	23.39	32.04	25.81	20.93	31.05	20.77	16.51	21.21	12.67
60.8	5	1188.41	1186.22	1175.08	1180.24	1222.33	1139.58	1129.25	1091.46	1055.9	601.67	1229.09	1125.44	985.25	814.66	49.94	90.97	1013.99	1282.32	1100.81	992.32	1091.34	952.3	1059.85	1114.16	1019.84
61	3	41.87	31.62	31.5	21.58	29.97	23.47	41.99	52.79	28.32	58.93	24.09	16.24	35.62	54.54	7.88	81.83	24.03	33.58	27.14	21.74	32.15	20.74	17.03	22.14	13.99
61	5	1184.43	1181.16	1170.97	1177	1218.62	1135.36	1126.16	1089.21	1048.74	597.76	1225.92	1122.08	983.86	807.97	49.08	89.87	1009.92	1277.78	1096.93	989.71	1086.42	950.41	1057.15	1109.89	1018.24
61.2	3	41.35	32.78	32.29	22.17	30.09	23.78	42.17	54.28	28.63	59.39	24.4	16.87	35.19	54.51	8.26	82.66	24.66	34.61	28.52	21.85	32.23	21.39	18.92	22.36	14.74
61.2	5	1175.3	1171.95	1163.73	1168.95	1210.24	1127.64	1118.59	1083.14	1039.61	591.13	1217.03	1114.5	977.45	798.39	47.36	87.93	1001.21	1268.61	1089.58	983.42	1077.26	944.61	1051.07	1102.5	1012.79
61.4	3	41.66	33.34	33.13	22.03	31.08	24.5	42.08	56.64	29.49	59.42	25.33	18.69	36.24	55.17	7.92	82.39	23.99	34.83	29.54	21.69	31.48	22.66	20.63	23.44	15.66
61.4	5	1157.02	1157.22	1148.39	1151.69	1192.21	1111.46	1101.92	1067.47	1021.76	579.28	1199.08	1097.44	963.6	782.04	43.17	84.06	986.14	1251.24	1074.83	969.01	1060.31	930.07	1037.91	1086.43	997.22
61.6	3	40.18	34.11	32.24	22.03	29.68	23.83	41.12	57.45	28.9	59.69	26.51	19.74	36.42	55.01	7.07	82.78	24.05	35.99	29.61	22.7	30.89	21.93	21.51	25.38	17.09
61.6	5	1145.33	1147.08	1136.48	1141.24	1180.52	1101.41	1092.09	1057.7	1008.87	570.98	1186.75	1087.23	953.1	770.96	41.13	81.98	977.67	1240.29	1065.61	958.8	1048.74	921.03	1029.6	1076.72	987.23
61.8	3	38.86	33.06	31.71	22.62	29.01	22.43	41.55	58.38	27.45	59.63	25.72	18.32	35.94	54.56	5.69	81.07	24.88	36.48	30.55	22.72	30.88	21.87	21	25.98	17.66
61.8	5	1136.45	1140.49	1126.87	1133.99	1170.78	1094.84	1085.75	1050.22	998.74	564.98	1179.47	1080.45	946.15	762.28	40.12	79.82	971.93	1232.25	1059.51	950.34	1041.9	915.11	1025.25	1068.51	980.81
62	3	38.07	32.18	30.96	22.82	28.4	22.47	41.88	60.08	27.27	61.1	24.93	17.36	35.67	54.04	5.74	78.52	25.37	35.59	29.26	22.66	32.35	22.12	21.04	26.25	16.9
62	5	1119.24	1124.87	1109.13	1116.84	1151.67	1077.34	1068.78	1034.68	980.49	551.9	1162.03	1063.84	930.41	745.9	37.52	74.53	958.22	1214.22	1045.27	933.71	1024.67	900.52	1009.93	1051.29	964.74
62.2	3	37.74	33.01	31.53	23.21	28.58	23.43	43	60.39	26.72	62.38	23.87	17.39	35.52	52.59	6.58	74.26	26.31	37.03	30.07	24.41	33.46	22.2	22.09	27.62	16.35
62.2	5	1103.05	1110.18	1092.36	1100.51	1134.5	1062.21	1053.29	1021.29	962.72	539.63	1143.8	1048.23	917.89	730.43	35.58	70.27	944.98	1196.79	1030.37	918.87	1009.43	886.57	995.54	1035.59	950.57
62.4	3	38.6	33.15	31.5	22.58	29.53	22.93	42.04	60.69	26.44	64.42	23.09	18.01	36.4	51.12	6.24	74.1	25.61	37.19	29.49	24.69	33.76	21.39	21.72	27.04	15.7
62.4	5	1091.63	1099.22	1083	1089.17	1122.92	1052.58	1043.5	1012.42	949.28	531.97	1131.11	1038.85	911.76	720.42	35.17	68.51	934.6	1185.34	1020.86	908.54	997.16	877.72	985.72	1025.36	941.23
62.6	3	38.95	32.89	30.83	22.91	30.04	23.8	42.23	60.05	23.8	65.96	21.77	18.46	35.92	49.34	5.58	72.26	25.48	36.4	28.55	25.31	33.41	20.8	21.47	25.69	15.32
62.6	5	1084.96	1089.64	1075.86	1081.97	1115.56	1046.02	1037.43	1005.88	939.49	527.15	1123.09	1032.38	907.77	713.16	34.25	67.49	927.92	1174.93	1014.12	902.78	989.28	872.89	980.25	1018.97	935.56
62.8	3	39.15	33.57	30.89	23.21	31.12	24.54	41.21	61.22	24.18	67.98	22.16	19.49	35.94	48.72	7.09	73.86	25.44	36.46	28.52	25.08	32.75	22.62	22.83	24.78	15.91
62.8	5	1077.81	1082	1070	1074.64	1108.79	1040.22	1031.99	1000.54	931.14	522.85	1115.31	1026.99	902.7	707.62	33.66	66.75	919.88	1165.18	1008.05	897.41	982.48	867.33	975.61	1013.51	930.16
63	3	38.49	32.51	31.31	23.02	32.21	25.99	38.51	62.62	24.43	69.53	21.58	20.9	36.56	47.87	6.94	72.47	23.91	34.39	29.52	24.37	31.36	24.37	22.15	23.46	15.75
63	5	1071.29	1077.07	1066.22	1069.39	1102.68	1034.34	1026.69	995.34	925.18	519.33	1108.69	1023.43	899.19	701.96	32.87	66.37	915.19	1158.21	1003.72	893.34	977.03	863.05	972.22	1009.52	925.82
63.2	3	37.48	33.06	30.3	21.34	30.96	25.59	36.78	63.17	25.13	71.7	22.07	19.95	36.02	46.57	5.92	73.26	22.93	33.61	28.73	24.31	30.28	24.91	21.01	23.45	16.14
63.2	5	1067.01	1073.36	1062.83	1066.72	1098.56	1030.7	1024.12	993.16	919.79	517.53	1104.48	1023.49	896.04	698.47	32.8	66.32	912.79	1153.64	1001.94	891.14	973.19	860.51	968.6	1006.84	924.77
63.4	3	35.85	31.87	29.5	20.82	30.94	23.42	36.21	64.27	24.67	73.42	21.78	18.99	35.03	46.45	5.11	69.31	22.18	31.61	29.18	23.93	29.5	25.88	18.63	23.14	16.9
63.4	5	1061.24	1068.43	1058.33	1063.77	1093.55	1027.71	1020.86	989.53	915.48	514.98	1101.02	1022.27	892.55	693.68	32.55	65.66	911.31	1147.67	998.61	888.47	970.12	858.16	966.48	1003.06	924.28
63.6	3	33.96	31.65	28.25	22.41	29.72	21.97	35.74	65.83	24.39	75.63	21.7	19.47	33.59	45.41	4.77	65.28	23.72	31.64	28.65	23.93	28.93	26.67	17.99	22.9	17.1
63.6	5	1049.66	1058.31	1048.01	1053.37	1081.24	1016.71	1010.06	980.03	906.05	507.8	1090.45	1012.63	881.8	683.88	31.14	63.64	903.9	1135.81	989.4	879.2	959.04	848.63	956.45	992.47	917.31
63.8	3	33.25	31.3	29	23.42	29.61	20.72	37.17	67.7	22.8	78.1	22	20.08	33.89	44.33	3.44	62.99	25.92	33.06	28.58	23.7	29	27.05	19.74	22.96	18.21
63.8	5	1040.1	1050.12	1038.91	1044.66	1072.32	1008.65	1002.27	973.18	898.31	502.65	1080.22	1004.5	874.32	675.45	30.35	62.25	897.07	1125.89	981.73	871.75	949.73	839.87	948.57	983.4	911.04
64	3	33.51	31.95	29.37	22.93	29.79	20.64	37.34	70.09	22.06	81.35	21.84	21.62	35.36	43.94	3.15	60.95	26.61	33.44	28.43	24.93	29.85	26.68	20.73	23.26	18.12
64	5	1032.5	1040.99	1029.7	1035.17	1062.42	1000.09	993.5	964.97	889.77	496.41	1068.49	996.28	866.55	667.02	29.03	60.52	890.64	1117.38	975.21	864.49	938.24	832.46	939.81	974.09	903.37
64.2	3	35.51	33.33	30.69	24.42	30.74	21.6	39.52	72.03	20.71	85.41	22.49	22.43	36.57	44.9	3.09	61.56	27.41	33.96	29.11	25.31	29.62	25.25	21.28	23.86	19.28
64.2	5	1027.89	1032.22	1022.43	1028.62	1055.99	993.75	987.06	959.25	883.52	492.74	1060.77	990.81	860.98	658.78	27.93	59.38	885.67	1108.44	969.19	859.42	930.16	827.22	933.44	966.81	898.63

## Sheet: Melting curve Results
Sample Group:	Default		Show channel:
Smoothing:	ON		Ch 1	No
Smoothing window:	9		Ch 2	No
Low limit	63.5		Ch 3	Yes
High limit	91.5		Ch 4	No
Max # of peaks:	1		Ch 5	Yes
Peak threshold:	10
Slope Correction:	Yes
Derivative:	Negative
Well	Replicate	Fluorophore	Sample Type	Sample Name	Target	Melt Temp 1	Peak Height 1	FW/HM Peak 1	Area Peak 1	Melt Temp 2	Peak Height 2	FW/HM Peak 2	Area Peak 2	Melt Temp 3	Peak Height 3	FW/HM Peak 3	Area Peak 3	Melt Temp 4	Peak Height 4	FW/HM Peak 4	Area Peak 4	Description
A01-Ch3		ROX	Unknown		DCL1	87.71	59.869331633164	0.450965627092123	28.7373595689036	0	0	0	0	0	0	0	0	0	0	0	0
A01-Ch5		SYBR	Unknown		DCL1	81.0800000000001	579.275070701575	1.91853419056025	1182.91463484395	0	0	0	0	0	0	0	0	0	0	0	0
A02-Ch3		ROX	Unknown		DCL1	90.98	51.8155921240897	0.321962847268582	17.7596575897105	0	0	0	0	0	0	0	0	0	0	0	0
A02-Ch5		SYBR	Unknown		DCL1	81.0600000000001	577.91788891139	1.93174292413944	1188.26824335797	0	0	0	0	0	0	0	0	0	0	0	0
A03-Ch3		ROX	Unknown		DCL1	89	55.2194034648989	0.0294375449180603	11.0438806929799	0	0	0	0	0	0	0	0	0	0	0	0
A03-Ch5		SYBR	Unknown		DCL1	81.0000000000001	590.297529531829	1.84515118614177	1159.31630802863	0	0	0	0	0	0	0	0	0	0	0	0
A04-Ch3		ROX	Unknown		DCL1	81.1500000000001	19.8578377010502	0.352863463246822	7.45826262348907	0	0	0	0	0	0	0	0	0	0	0	0
A04-Ch5		SYBR	Unknown		DCL1	80.88	630.687642887476	1.61821260667504	1086.29786215848	0	0	0	0	0	0	0	0	0	0	0	0
A05-Ch3		ROX	Unknown		DCL1	86.65	22.3786206311847	0.52813229085356	12.5798382933606	0	0	0	0	0	0	0	0	0	0	0	0
A05-Ch5		SYBR	Unknown		DCL1	80.9300000000001	654.917207880799	1.71485540652706	1195.39911876437	0	0	0	0	0	0	0	0	0	0	0	0
A06-Ch3		ROX	Unknown		DCL1	86.61	34.1285895928237	0.314200400054455	11.416962671275	0	0	0	0	0	0	0	0	0	0	0	0
A06-Ch5		SYBR	Unknown		DCL1	80.88	594.051949289868	1.68690410826083	1066.63012141974	0	0	0	0	0	0	0	0	0	0	0	0
A07-Ch3		ROX	Unknown		DCL1	87.62	61.2574823225274	0.611049102906883	39.8413712022543	0	0	0	0	0	0	0	0	0	0	0	0
A07-Ch5		SYBR	Unknown		DCL1	80.9100000000001	587.138683858426	1.75528586489309	1096.95187096998	0	0	0	0	0	0	0	0	0	0	0	0
A08-Ch3		ROX	Unknown		DCL1	69.21	61.8812463359674	1.15810505331438	76.279182765879	0	0	0	0	0	0	0	0	0	0	0	0
A08-Ch5		SYBR	Unknown		DCL1	80.9100000000001	552.913646347557	1.73606743166505	1021.69888960656	0	0	0	0	0	0	0	0	0	0	0	0
A09-Ch3		ROX	Unknown		DCL1	87.76	57.6660869637387	0.337466517913342	20.7138516174149	0	0	0	0	0	0	0	0	0	0	0	0
A09-Ch5		SYBR	Unknown		DCL1	80.9300000000001	559.824483846149	1.74867955545222	1041.98422393461	0	0	0	0	0	0	0	0	0	0	0	0
A10-Ch3		ROX	Unknown		DCL1	68.25	59.5372575004772	1.22633235717849	77.7134225044391	0	0	0	0	0	0	0	0	0	0	0	0
A10-Ch5		SYBR	Unknown		DCL1	80.6999999999999	321.216144147428	1.69266946554913	578.720074346812	0	0	0	0	0	0	0	0	0	0	0	0
A11-Ch3		ROX	Unknown		DCL1	89.98	42.4586194961023	0.189932199954987	9.14406574772928	0	0	0	0	0	0	0	0	0	0	0	0
A11-Ch5		SYBR	Unknown		DCL1	81.0400000000001	623.892401420859	1.78593788013391	1185.97372606059	0	0	0	0	0	0	0	0	0	0	0	0
A12-Ch3		ROX	Unknown		DCL1	86.2	18.3274919543804	0.0294375449180603	3.66549839087614	0	0	0	0	0	0	0	0	0	0	0	0
A12-Ch5		SYBR	Unknown		DCL1	81.0800000000001	556.663461271393	1.87095089019423	1108.54703938244	0	0	0	0	0	0	0	0	0	0	0	0
A13-Ch3		ROX	Unknown		DCL1	74.02	68.4393053312973	0.708193349286541	51.588922763245	0	0	0	0	0	0	0	0	0	0	0	0
