# Supplementary material for: Genome-wide identification of gene families related to miRNA biogenesis in Mangifera indica L. and their possible role during heat stress
Source: PeerJ. 2024 Jul 17;12:e17737. doi: 10.7717/peerj.17737 (PMC11260077; doi:10.7717/peerj.17737)
Supplement: Supplemental Information 17 [file peerj-12-17737-s017.xlsx]

## Sheet: General Info
General Info
Ord File Name	C:\Users\Propietario\Documents\Andrés\Corrida final tratados DCL1 13 de julio 2018.ord
Software Version	2.2.250.602
Instrument Name	PR0961400539
Instrument Serial	PR0961400539
Instrument Version	PCR 2.3.2, RT 1.1.12.23
Used Data Step	1
Sample Group	Default
Protocol Log	StartTime: 13/07/2018 03:21:49 p.m.
	RunTime: 01:21:50
	Path: /SHARED/PCPTP
	No errors

## Sheet: Plate
Well	Fluorophore	Sample Type	Target	Description	Quantity	AD Std Value	Replicate	Sample Name		Sample Group	Default
A01-Ch1	[none]	[none]			0						A1
A01-Ch2	[none]	[none]			0						A2
A01-Ch3	[none]	[none]			0						A3
A01-Ch4	[none]	[none]			0						A4
A01-Ch5	[none]	[none]			0						A5
A02-Ch1	[none]	[none]			0						A6
A02-Ch2	[none]	[none]			0						A7
A02-Ch3	[none]	[none]			0						A8
A02-Ch4	[none]	[none]			0						A9
A02-Ch5	[none]	[none]			0						A10
A03-Ch1	[none]	[none]			0						A11
A03-Ch2	[none]	[none]			0						A12
A03-Ch3	[none]	[none]			0						A13
A03-Ch4	[none]	[none]			0						A14
A03-Ch5	[none]	[none]			0						A15
A04-Ch1	[none]	[none]			0						A16
A04-Ch2	[none]	[none]			0						B1
A04-Ch3	[none]	[none]			0						B2
A04-Ch4	[none]	[none]			0						B3
A04-Ch5	[none]	[none]			0						B4
A05-Ch1	[none]	[none]			0						B5
A05-Ch2	[none]	[none]			0						B6
A05-Ch3	[none]	[none]			0						B7
A05-Ch4	[none]	[none]			0						B8
A05-Ch5	[none]	[none]			0						B9
A06-Ch1	[none]	[none]			0						B10
A06-Ch2	[none]	[none]			0						B11
A06-Ch3	[none]	[none]			0						B12
A06-Ch4	[none]	[none]			0						B13
A06-Ch5	[none]	[none]			0						B14
A07-Ch1	[none]	[none]			0						B15
A07-Ch2	[none]	[none]			0						B16
A07-Ch3	[none]	[none]			0						C1
A07-Ch4	[none]	[none]			0						C2
A07-Ch5	[none]	[none]			0						C3
A08-Ch1	[none]	[none]			0						C4
A08-Ch2	[none]	[none]			0						C5
A08-Ch3	[none]	[none]			0						C6
A08-Ch4	[none]	[none]			0						C7
A08-Ch5	[none]	[none]			0						C8
A09-Ch1	[none]	[none]			0						C9
A09-Ch2	[none]	[none]			0						C10
A09-Ch3	[none]	[none]			0						C11
A09-Ch4	[none]	[none]			0						C12
A09-Ch5	[none]	[none]			0						C13
A10-Ch1	[none]	[none]			0						C14
A10-Ch2	[none]	[none]			0						C15
A10-Ch3	[none]	[none]			0						C16
A10-Ch4	[none]	[none]			0						D1
A10-Ch5	[none]	[none]			0						D2
A11-Ch1	[none]	[none]			0						D3
A11-Ch2	[none]	[none]			0						D4
A11-Ch3	[none]	[none]			0						D5
A11-Ch4	[none]	[none]			0						D6

## Sheet: Protocol
Reaction volume	10		Channel in use:
Consumable	1		Ch 1	No
Ramp rate	7		Ch 2	No
Heated lid ON	True		Ch 3	Yes (ROX)
Heated lid temperature	105		Ch 4	No
			Ch 5	Yes (SYBR)
	No	Cycle	Type	Information
	1		Temperature	Temp.: 95°C; Time:07:00
	2		Cycle	Number of cycles to loop:40; Number of steps inside loop:2
	3	*	. Temperature	Temp.: 95°C; Time:00:05
DA	4	*	. Temperature	Temp.: 60°C; Time:00:30; Data acquisition:True
	5		Temperature	Temp.: 60°C; Time:00:30
	6		Melting Curve	Start temperature:60°C; End temperature:95°C; Hold time:00:01; Temperature increment after hold:0.2°C
	7		Temperature	Temp.: 20°C; Time:00:10

## Sheet: Acquired Data 1
Data step:	4			Show channel:	Thresholds:
Sample Group:	Default		Ch 1	No
Method:	Threshold		Ch 2	No
Smoothing:	ON		Ch 3	No
Smoothing window:	5		Ch 4	No
Baseline:	Trend		Ch 5	Yes	243.14
Baseline range start:	3
Baseline range end:	7
Channel	Cycle	Temp	A1	A2	A3	A4	A5	A6	A7	A8	A9	A10	A11	A12	A13	A14	A15	A16	B1	B2	B3	B4	B5	B6	B7	B8
5	1	60	-106.07	26.35	9.7	-4.41	-34.92	-5.2	-22.95	-2.51	10.08	3.63	18.58	-57.09	-53.72	0.07	5.64	4.93	-22.94	-11.75	45	26.44	30.01	39.83	42.4	24.9
5	2	60	-103.72	19	7.85	4.21	-29.6	3.27	-16.26	6.35	21.85	7.21	16.39	-43.53	-49.88	7.77	5.96	6.79	-20.67	-21.28	33.02	22.16	27.13	27.63	30.76	18.65
5	3	60	-106.19	12.18	1.6	5.78	-27.49	5.2	-13.52	9.78	24.23	7.85	11.27	-37.31	-49.92	10.39	5.01	6.35	-22.23	-31.12	20.72	16.04	20.09	15.71	18.25	9.49
5	4	60	-117.3	1.34	-15.5	-5.27	-31.45	-3.45	-17.64	5.19	11.45	2.59	-0.43	-42.21	-56.99	3.12	1.63	1.27	-31.08	-45.68	4.07	5.82	4.82	1.42	1.78	-5.79
5	5	60	-125.87	0	-20.14	-11.82	-32.4	-10.46	-22.34	-2.99	0	0	-9.85	-44.93	-62.16	0	0	0	-38.34	-52.46	-7.77	-4.12	-6.77	-7.02	-10.43	-17.73
5	6	60	-113.16	16.22	-8.13	-1.44	-24.7	-3.79	-14.29	4.44	5.31	6.8	-0.16	-33.17	-47.76	17.09	2.95	4.25	-27.56	-39.16	-1.06	0.71	0.48	-0.36	-4.31	-8.4
5	7	60	-101.75	20.62	1	3.67	-17.85	1.54	-6.3	6.54	8.47	12.75	6.53	-25.01	-35.12	32.4	5.93	9.07	-21.58	-30.36	-0.77	1.81	4.56	4.56	-1.15	-1.58
5	8	60	-87.98	26.53	6.16	8.2	-7.46	6.76	4.9	12.71	15.03	20.83	12	-17.32	-21.12	45.8	8.77	12.48	-12.12	-20.61	5.58	6.25	9.68	8.76	6.58	3.71
5	9	60	-84.75	19.98	0	2.43	-8.95	3.46	0.96	5.33	9.64	20.93	0.42	-18.8	-22.9	37.2	8.63	11.7	-12.02	-23.61	0.53	-0.17	1.58	0.68	2.19	-2.98
5	10	60	-77.85	21.76	-1.82	-0.63	-10.66	1.43	-2.28	2.59	12.22	22.6	-3.07	-17.63	-20.85	34.56	9.96	12.29	-12.93	-20.41	0.38	-4.48	-2.83	-1.92	0.74	-3.98
5	11	60	-77.74	16.63	-7.21	-3.92	-15.31	-3.97	-7.9	-4.78	7.57	22.41	-5.88	-19.53	-23.27	31.71	9.59	12.77	-17.13	-21.21	-7.71	-10.31	-8.14	-4.69	-5.8	-9.84
5	12	60	-70.82	19.33	-4.39	-0.39	-7.95	-4.02	-4.39	-2.19	10.31	27.38	-0.11	-11.84	-13.48	43.44	11.4	15.97	-12.69	-15.61	-3.62	-6.04	-3.6	-1.35	-4.02	-5.53
5	13	60	-58.51	28.02	0.74	5.47	-0.15	3.42	2.58	3.79	11.91	32.06	7.14	-1.66	-2.35	54.65	12.85	17.47	-4.13	-5.74	6.68	1.88	2.11	3.41	0.63	0.48
5	14	60	-47.08	37.11	6.52	7.05	6.09	9.71	8.34	8.34	17.77	37.25	13.86	5.12	3.95	60.89	15.17	18.99	4.46	5.32	11.94	2.96	2.93	6.74	7.45	4.82
5	15	60	-49.35	34.76	2.26	2.49	0.93	9.65	2.99	2.16	14.1	37.74	11.06	0.6	1.56	56.79	15.3	18.63	2.48	5.64	2.7	-3.31	-2.28	1.06	4.28	1.13
5	16	60	-59.08	22.95	-7.97	-5.26	-5.54	2.2	-6.2	-4.88	9.29	35.57	4.6	-6.65	-4.44	47.73	14.98	19.29	-4.9	-3.76	-9.82	-14.52	-11.77	-11.42	-3.53	-4.57
5	17	60	-57.41	22.4	-8.73	-3.8	-3.92	3.81	-0.62	-2.44	10.57	35.75	4.81	-0.68	0.18	48.9	15.25	21.71	-4.36	-2.02	-7.97	-16.19	-12.59	-11.22	-1.22	-2.82
5	18	60	-55.78	22.14	-10.82	-2.55	-3.53	2.71	1.61	-4	11.67	35.05	1.2	3.27	1.1	44.19	16.2	20.91	-4.12	0.55	-10.54	-21.17	-14.89	-11.44	-1.86	-4.88
5	19	60	-45.18	31.27	-2.72	5.6	0.81	11.94	11.47	2.13	18.13	37.89	6.56	11.14	14.05	51.06	18.13	24.54	1.78	11.83	-4.47	-13	-7.71	-4.23	3.81	1.94
5	20	60	-38.75	39.87	1.99	11.16	5.3	16.72	13.88	9.64	21.28	40.04	13.74	18.22	24.58	55.7	20.25	28.89	4.66	20.8	-2.01	-9.62	-6.14	-1.29	7.86	4.38
5	21	60	-38.57	35.8	-0.84	11.22	4.9	17.96	15.05	10.9	19.12	38.47	16.62	21.68	25.89	51.81	20.74	29.87	3.62	21.85	-4.97	-12.91	-10.94	-1.97	11.9	1.61
5	22	60	-40.99	35.63	-3.71	12.12	6.97	19.98	15.06	8.66	16.74	34.87	18.97	23.56	24.59	48.65	20.29	27.97	0.72	25.14	-5.06	-18.78	-12.75	-0.53	12.73	1.05
5	23	60	-22.43	55.43	15.25	30.8	25.97	37.08	33.61	24.23	30.15	41.98	39.62	38.85	42.76	67.73	22.83	33.33	17.3	46.73	13.64	-1.96	5.28	14.62	28.49	19.85
5	24	60	-2.28	79.12	34.2	51.18	42.85	51.6	48.19	40.22	45.23	51.73	60.1	59.19	66.9	87.69	27.63	41.42	31.38	70.65	30.6	16.41	21.89	26.22	43.23	35.81
5	25	60	0.17	79.58	32.91	52.42	43.14	49.28	48.03	37.39	45.4	51.59	59.8	63.47	72.7	85.47	28.76	42.65	30.7	75.85	26.36	16.82	23.06	21.91	43.77	35.44
5	26	60	-2.35	76.62	29.85	46.14	37.74	45.42	45.46	27.73	42.06	45.02	57.79	61.14	76.5	80.67	28.87	39.87	28.5	75.39	23.48	7.99	16.18	19.88	39.15	32.74
5	27	60	0.75	77.03	30.19	42.8	36.03	44.39	46.73	26.67	40.39	43.3	58.23	60.42	81.58	77.72	28.72	38.71	34.29	74.22	21.62	4.79	15.99	21.39	36.63	35.97
5	28	60	1.65	78.04	30.49	40.92	31.85	42.23	47.7	26.79	37.25	42.37	56.46	60.07	82.98	70.15	28.09	38.16	36.2	74.85	20.69	2.43	11.43	18.95	32.09	35.78
5	29	60	2.58	80.91	29.76	38.45	35.03	37.91	44.83	21.95	33.8	41.72	54.04	63.19	82.89	65.92	26.19	40.31	37.2	80.12	19.35	-0.01	11.69	16.12	29.59	37.44
5	30	60	-1.4	81.24	27.52	35.06	33.91	32.98	42.22	13.6	32.38	39.59	49.1	62.11	84.11	60.64	25.82	40.57	33.5	82.04	15.37	-4.16	6.96	12.45	27.2	33.69
5	31	60	-1.24	79.43	22.77	34.91	34.49	33.79	43.16	12.48	34.93	42.29	50.39	64.86	89.4	62.44	27	42.15	35.35	80.91	10.34	-6.36	7.99	13.43	28.95	36.01
5	32	60	-1.86	74.94	18	34.05	29.43	32.03	43.04	12.2	31.72	42.17	45.24	64.42	88.95	59.97	26.09	41.93	35.11	78.57	9.05	-11.7	3.67	12.7	24.8	35.13
5	33	60	1.26	72.2	16	30.78	27.85	28.06	40.94	8.38	26.76	40.93	45.95	66.91	90.48	61.58	27	43.92	36.52	76.82	11.87	-15.9	2.57	8.37	19.82	33.86
5	34	60	-3.87	65.4	10.01	20.02	20.12	18.77	34.39	-1.66	16.73	37.03	37.07	60.99	90.84	52.89	25.6	43.11	30.59	68.8	-0.26	-25.12	-5.71	-2.7	12.18	25.92
5	35	60	-8.43	60.97	2.41	9.4	14.18	12.85	29.39	-12.03	11.87	33.48	35.16	56.3	90.6	51.52	26.2	41.74	26.71	65.38	-12.66	-33.71	-13.89	-9.4	5.84	21.81
5	36	60	-6.21	61.34	-2.18	7.27	11.09	11.82	28.23	-16.4	12.72	33.39	32	55.95	92.56	51.98	26.71	42.82	26.72	68.8	-16.25	-35.68	-17.07	-8.68	3.5	23.28
5	37	60	-3.05	62.19	-1.79	7.99	9.98	11.36	27.84	-17.53	19.02	33.94	31.73	60.61	95.87	54.92	28.19	44.69	31.46	75.29	-13.31	-37.38	-17.07	-7.77	3.7	24.44
5	38	60	-2.96	59.2	0.09	6.45	8.39	10.49	25.83	-19.23	20.19	35.66	30.23	62.39	98.21	52.24	26.71	45.6	33.11	74.31	-15.67	-42.23	-21.51	-10.52	4.63	24.06
5	39	60	-8.93	56.43	-3.99	1.06	5.11	5.68	23.9	-24.01	16.97	35.17	24.19	60.94	97.22	51.73	25.59	45.28	31.74	73.34	-20.75	-48.97	-27.93	-13.42	0.69	21.18
5	40	60	-20.29	52.84	-12.53	-8.19	0.28	-2.64	21.46	-31.63	9.03	32.99	14.68	56.37	92.55	51.78	24.18	43.71	26.97	70.51	-28.77	-58.05	-37.43	-17.47	-7.15	15.48

## Sheet: Cq Results
Data step:	4			Show channel:	Thresholds:
Sample Group:	Default		Ch 1	No
Method:	Threshold		Ch 2	No
Smoothing:	ON		Ch 3	No
Smoothing window:	5		Ch 4	No
Baseline:	Trend		Ch 5	Yes	243.14
Baseline range start:	3
Baseline range end:	7
Well	Replicate	Fluorophore	Sample Type	Sample Name	Target	Cq	Quantity	Omitted	Description
A01-Ch5		[none]	[none]			NeuN	0
A02-Ch5		[none]	[none]			NeuN	0
A03-Ch5		[none]	[none]			NeuN	0
A04-Ch5		[none]	[none]			NeuN	0
A05-Ch5		[none]	[none]			NeuN	0
A06-Ch5		[none]	[none]			NeuN	0
A07-Ch5		[none]	[none]			NeuN	0
A08-Ch5		[none]	[none]			NeuN	0
A09-Ch5		[none]	[none]			NeuN	0
A10-Ch5		[none]	[none]			NeuN	0
A11-Ch5		[none]	[none]			NeuN	0
A12-Ch5		[none]	[none]			NeuN	0
A13-Ch5		[none]	[none]			NeuN	0
A14-Ch5		[none]	[none]			NeuN	0
A15-Ch5		[none]	[none]			NeuN	0
A16-Ch5		[none]	[none]			NeuN	0
B01-Ch5		[none]	[none]			NeuN	0
B02-Ch5		[none]	[none]			NeuN	0
B03-Ch5		[none]	[none]			NeuN	0
B04-Ch5		[none]	[none]			NeuN	0
B05-Ch5		[none]	[none]			NeuN	0
B06-Ch5		[none]	[none]			NeuN	0
B07-Ch5		[none]	[none]			NeuN	0
B08-Ch5		[none]	[none]			NeuN	0
B09-Ch5		[none]	[none]			NeuN	0
B10-Ch5		[none]	[none]			NeuN	0

## Sheet: Melt Curve Data
Sample Group:	Default		Show channel:
Smoothing:	ON		Ch 1	No
Smoothing window:	9		Ch 2	No
Low limit	63.5		Ch 3	Yes
High limit	91.5		Ch 4	No
Max # of peaks:	1		Ch 5	Yes
Peak threshold:	10
Slope Correction:	Yes
Derivative:	Negative
Temp	Channel	A1	A2	A3	A4	A5	A6	A7	A8	A9	A10	A11	A12	A13	A14	A15	A16	B1	B2	B3	B4	B5	B6	B7	B8	B9
60	3	54.45	36.42	40.97	35.11	38.97	41.45	33.56	34.96	41.12	32.62	22.88	21.13	23.52	18.08	11.62	110.7	30.05	35.36	36	27.84	42.35	149.57	26.55	34.63	18.5
60	5	1008.43	1113.92	1136.39	1012.09	1064.56	978.75	987.03	986.32	732.32	437.98	1120.42	937.7	1031.33	1325.41	27.88	88.27	935.6	1224.46	1097.89	1043.19	1107.98	919.87	991.15	1010.17	908.38
60.2	3	55.96	37.27	39.39	36.53	41.93	40.71	34.74	36.29	42.34	31.74	23.8	21.5	24.68	21.19	11.64	109.4	29.26	35.93	35.64	29.41	41.03	147.68	26.04	33.81	17.05
60.2	5	1009.71	1114.07	1134.54	1014.23	1066.14	977.44	987.09	987.02	727.83	436.48	1121.6	940.26	1030.5	1326.97	27.56	87.9	937.9	1223.69	1100.31	1044.9	1108.29	923.02	991.27	1012.55	908.66
60.4	3	57.22	37.89	38.42	37.7	44.16	40.3	35.74	37.34	43.29	31.19	24.58	22.03	25.66	23.96	11.86	108.43	29.11	36.48	35.6	30.87	40.18	144.84	25.9	33.52	16.19
60.4	5	1009.81	1113.13	1131.8	1015.1	1066.28	975.73	986.26	986.46	723.16	434.49	1121.32	941.68	1029.07	1327.53	27.05	87.07	938.74	1221.68	1101.13	1045.29	1107.38	924.8	990.62	1013.6	908.07
60.6	3	58.2	38.29	38.08	38.62	45.68	40.24	36.55	38.1	43.95	30.98	25.22	22.71	26.45	26.42	12.28	107.81	29.6	37	35.88	32.2	39.8	141.04	26.14	33.77	15.92
60.6	5	1008.73	1111.09	1128.18	1014.7	1064.96	973.62	984.54	984.64	718.31	432.03	1119.57	941.96	1027.04	1327.1	26.36	85.8	938.13	1218.43	1100.33	1044.36	1105.25	925.2	989.23	1013.3	906.61
60.8	3	58.93	38.46	38.35	39.28	46.48	40.51	37.18	38.58	44.33	31.11	25.73	23.54	27.07	28.54	12.91	107.51	30.72	37.5	36.48	33.41	39.9	136.27	26.75	34.56	16.23
60.8	5	1006.48	1107.95	1123.68	1013.04	1062.2	971.11	981.93	981.56	713.27	429.1	1116.36	941.08	1024.4	1325.66	25.48	84.07	936.06	1213.95	1097.93	1042.1	1101.9	924.23	987.08	1011.67	904.29
61	3	59.51	39.13	40.31	39.56	45.9	41.02	37.17	39.1	44.88	32.5	26.68	24.46	27.48	30.44	14.28	108.8	33.98	38.05	38.59	34.88	41.05	129.16	28.16	36.38	17.67
61	5	1001.55	1103.06	1115.47	1009.2	1056.17	967.49	977.38	975.91	708.45	425.25	1110.1	938.76	1020.42	1322.68	23.89	80.87	931.53	1206.87	1092.4	1037.06	1096.62	920.21	983.39	1007.27	899.57
61.2	3	59.48	38.24	41.59	38.62	44.49	41.36	37.14	38.48	44.2	32.21	26.85	26.11	28.81	32.78	15.62	110.42	36.37	38.77	39.28	35.7	41.63	122.37	29.17	37.53	19.09
61.2	5	994.88	1094.06	1107.12	1002.1	1047.25	960.16	969.12	967.76	699.74	419.77	1100.54	932.16	1013.18	1315.01	21.92	77.42	923.37	1197.23	1083.68	1029.46	1086.97	913.8	977.62	999.29	892.34
61.4	3	59.16	36.9	41.69	38.55	44.67	42.92	38.98	37.73	43.83	31.7	26.98	27.67	27.25	32.96	16.22	108.42	35.22	37.51	39.56	34.15	41.68	114.28	29.6	38.48	19.01
61.4	5	993.85	1093.05	1107.77	1002.47	1047.64	961.99	969.37	967.51	697.9	418.47	1099.9	932.98	1015.03	1318.4	22.39	76.8	922.63	1196.68	1083.33	1029.38	1087.48	914.03	978.43	999.45	893.67
61.6	3	58.61	37.02	41.27	39.28	43.25	44.41	39.12	36.3	42.32	31.06	26.25	28.24	26.45	32.08	14.98	105.99	35.22	37.46	39.3	34.14	41.28	106.67	29.59	39.52	20.46
61.6	5	993.4	1091.25	1106.89	1001.64	1046.03	961.79	970.14	966.21	695.1	416.96	1098.25	932.71	1015.28	1318.22	22.36	76.31	922.71	1195.6	1082.08	1029.33	1086.45	914.39	978.53	999.55	895.12
61.8	3	56.98	35.9	41.83	39.8	42.31	44.93	39.26	36.24	41.37	30.63	24.6	28.5	27.08	31.13	13.11	101.45	33.03	38.02	38.36	34.88	40.58	98.68	29	38.28	21.66
61.8	5	993.88	1090.89	1107.99	1001.92	1047.35	963.36	970.8	966.14	694.69	416.11	1096.99	934.95	1017.06	1320.46	22.76	76.58	923.34	1195.01	1082.43	1031.53	1086.04	916.61	979.04	1000.52	898.12
62	3	57.56	36.89	41.02	40.41	44.28	44.18	39.36	36.46	40.2	30.24	23.74	27.32	26.85	31.66	11.22	98.49	31.9	37.33	38.74	35.79	39.52	91.18	28.7	37.4	21.56
62	5	996.28	1092.44	1108.36	1002.56	1046.32	962.99	971.63	967.29	693.16	414.98	1096.69	937.91	1018.88	1322.48	23.91	76.25	924.81	1194.32	1084.44	1034.56	1086.38	917.77	981.74	1000.52	900.72
62.2	3	57.53	37.57	39.15	41.45	44.82	43.71	39.97	37.48	40.57	31.13	22.9	27.08	27.65	33.84	10.27	98.44	32.11	37.62	38.64	35.36	37.29	84.09	27.94	35.78	21.27
62.2	5	994.01	1089.82	1105.38	1000.9	1043.5	960.51	968.46	964.96	689.61	413.22	1092.89	938.32	1017.75	1319.64	23.99	75.46	924.68	1189.97	1083.05	1032.98	1083.11	916	981.71	997.6	899.4
62.4	3	60.14	38.05	37.86	42.66	45.22	43.89	41.17	38.74	40.73	32.39	23.05	28.82	29.73	36.48	10.16	99.04	32.59	38.3	39.86	35.81	37.72	78.68	28.19	36.09	21.69
62.4	5	987.76	1083.91	1098.33	997.43	1037.48	954.72	960.59	958.39	683.92	409.05	1084.58	933.74	1012.95	1311.66	22.84	73.32	919.55	1182.54	1077.1	1028.01	1076.1	910.84	976.17	991.14	894.96
62.6	3	60.97	38.22	38.98	43.27	45.15	43.44	41.18	39.5	41.19	34.38	23.53	29.55	30.98	36.77	11.22	100.78	34.3	38.76	40.84	37.74	38.11	74.28	28.91	36.22	22.26
62.6	5	981.15	1077.93	1088.73	991.42	1029.44	948.04	953.66	949.91	677.76	404.59	1075.3	927.66	1005.86	1302.05	21.55	70.88	912.45	1171.42	1070.23	1021.73	1065.4	903.97	969.86	984.07	889.33
62.8	3	62.75	38.66	40.43	41.65	44.99	44.79	41.59	39.34	41.29	34.7	24.98	30.65	31.02	37.65	11.83	101.79	34.76	40.11	42.98	38.25	38.92	70.53	29.88	36.9	23.29
62.8	5	972.68	1068.33	1079.62	983.43	1019.96	939.81	945.28	941.23	670.27	399.74	1064.85	920.68	998.03	1290.47	19.88	68.84	904.65	1160.91	1062.9	1013.75	1055.13	896.95	962.85	974.97	882.97
63	3	64.79	39.31	41.72	41.82	45.07	45.43	42.78	39.01	42.26	34.9	27.19	33.09	30.87	37.55	13.46	100.1	34.62	41.09	42.69	38.11	39.94	67.76	30.43	37.95	23.07
63	5	970.93	1066.28	1077.76	983.11	1018.08	939.24	944.1	940.14	668.92	398.87	1063.37	919.92	996.56	1288.3	20.09	68.99	904.34	1158.24	1062.33	1012.53	1053.27	896.12	961.84	974.77	884.99
63.2	3	67.04	39.91	41.6	42.11	44.53	44.98	42.02	37.82	41.6	33.46	27.9	33.58	30.3	37.19	13.7	97.81	35.91	41.22	41.47	38.17	39.18	66.34	30.71	37.85	24.29
63.2	5	965.26	1059.23	1070.35	977.05	1010.53	933.45	937.94	933.26	664.51	395.56	1057.23	914.89	990.28	1280.33	19.04	67.31	900.39	1150.37	1055.33	1005.78	1047.07	892.8	954.76	968.9	881.67
63.4	3	67.9	39.63	41.73	42.2	44.72	45.15	41.55	37.1	41.12	32.77	26.87	33.61	31.16	35.86	13.37	93.63	36.43	41.01	40.54	38.2	39.49	65.07	30.92	37.32	25.22
63.4	5	961.78	1055.26	1066.96	973.83	1004.65	929.66	933.17	929.14	661.57	393.42	1051.76	912.58	987.15	1274.43	18.75	66.19	898.61	1144.64	1051.32	1001.73	1042.3	890.85	949.6	966.16	881.63
63.6	3	67.68	39.31	40.57	42.06	45.72	44.2	41.55	36.85	39.98	32.51	26.01	32.77	30.02	35.88	13.46	91.76	37.62	39.31	40.02	37.95	37.6	63.9	30.28	37.08	25.93
63.6	5	959.51	1051.36	1061.74	968.44	997.66	925.21	929.19	924.62	658.58	390.83	1046.18	909.67	983.39	1267.24	19.13	64.27	896.3	1139.4	1047.7	997.58	1037.88	888.06	945.67	961.66	879.82
63.8	3	67.29	38.97	40.2	43.26	45.86	44.95	41.44	37.01	39.86	33.03	24.93	33.3	31.61	38.54	14.25	94.4	39.17	38.26	38.33	35.86	36.71	62.04	30.15	36.68	27.03
63.8	5	953.73	1042.37	1054.32	960.8	990.97	919.09	922.13	918.09	652.15	387.17	1039.36	905.24	976.03	1257.23	17.8	62.75	892.29	1130.84	1039.73	990.69	1030.2	882.13	938.57	954.84	875.72
64	3	67.63	37.75	39.17	44.84	46.16	45.01	41.48	37.66	39.92	33.06	23.95	33.32	32.78	40.02	14.55	96.33	39.24	36.84	37.47	34.64	37.41	60.04	30.64	36.77	27.03
64	5	949.59	1035.09	1048.43	956.12	985.33	913.77	916.34	913.07	646.44	383.02	1033.59	900.4	971.61	1249.02	17.77	61.56	887.8	1125.17	1034.51	985.93	1023.93	877.5	933.66	950.56	871.63
64.2	3	65.72	37.9	39.37	44.78	46.14	43.55	41.26	37.06	40.43	32.42	23.71	31.76	33.5	38.67	13.87	98.52	39.3	37.87	36.54	34.74	37.58	57.28	30.21	35.23	26.96
64.2	5	948.29	1031.99	1045.15	953.59	984.36	911.32	915.44	911.58	643.87	382.24	1030.98	898.88	968.59	1244.24	18.2	60.87	886.18	1122.67	1031.72	984.87	1020.91	874.61	932.32	948.72	872.11

## Sheet: Melting curve Results
Sample Group:	Default		Show channel:
Smoothing:	ON		Ch 1	No
Smoothing window:	9		Ch 2	No
Low limit	63.5		Ch 3	Yes
High limit	91.5		Ch 4	No
Max # of peaks:	1		Ch 5	Yes
Peak threshold:	10
Slope Correction:	Yes
Derivative:	Negative
Well	Replicate	Fluorophore	Sample Type	Sample Name	Target	Melt Temp 1	Peak Height 1	FW/HM Peak 1	Area Peak 1	Melt Temp 2	Peak Height 2	FW/HM Peak 2	Area Peak 2	Melt Temp 3	Peak Height 3	FW/HM Peak 3	Area Peak 3	Melt Temp 4	Peak Height 4	FW/HM Peak 4	Area Peak 4	Description
A01-Ch3		[none]	[none]			72.25	59.4892313346597	0.854274777407013	54.0922397245709	0	0	0	0	0	0	0	0	0	0	0	0
A01-Ch5		[none]	[none]			83.79	681.121917620529	1.24158173799855	900.117477266422	0	0	0	0	0	0	0	0	0	0	0	0
A02-Ch3		[none]	[none]			87.01	60.788688246626	0.556903100158274	36.0330836686042	0	0	0	0	0	0	0	0	0	0	0	0
A02-Ch5		[none]	[none]			83.79	744.309608792084	1.29024874997665	1022.17697801104	0	0	0	0	0	0	0	0	0	0	0	0
A03-Ch3		[none]	[none]			90.2	55.2402377763108	0.211991189861298	12.9215934188134	0	0	0	0	0	0	0	0	0	0	0	0
A03-Ch5		[none]	[none]			83.74	780.905117909735	1.26773356558238	1053.7201403977	0	0	0	0	0	0	0	0	0	0	0	0
A04-Ch3		[none]	[none]			76.8	168.970380989875	0.602246083907783	108.313749658799	0	0	0	0	0	0	0	0	0	0	0	0
A04-Ch5		[none]	[none]			83.98	614.432649716423	1.40228188079134	917.082973288612	0	0	0	0	0	0	0	0	0	0	0	0
A05-Ch3		[none]	[none]			74.71	207.292000162428	0.690740889996663	152.40412807164	0	0	0	0	0	0	0	0	0	0	0	0
A05-Ch5		[none]	[none]			83.6899999999999	694.549795881038	1.2441776957043	919.781822088734	0	0	0	0	0	0	0	0	0	0	0	0
A06-Ch3		[none]	[none]			74.52	191.371769336654	0.677929560511932	138.08975727408	0	0	0	0	0	0	0	0	0	0	0	0
A06-Ch5		[none]	[none]			84.14	544.67757993948	1.46168700562525	847.408679684457	0	0	0	0	0	0	0	0	0	0	0	0
A07-Ch3		[none]	[none]			75.32	177.77733982878	0.641808206466213	121.445294385396	0	0	0	0	0	0	0	0	0	0	0	0
A07-Ch5		[none]	[none]			83.6799999999999	645.625331109963	1.23579983219937	849.234670566889	0	0	0	0	0	0	0	0	0	0	0	0
A08-Ch3		[none]	[none]			80.01	261.946423190974	0.478624518589676	133.446269959863	0	0	0	0	0	0	0	0	0	0	0	0
A08-Ch5		[none]	[none]			84	554.08376508148	1.43639656400741	847.127549330366	0	0	0	0	0	0	0	0	0	0	0	0
A09-Ch3		[none]	[none]			73.82	350.288839673699	0.577907482789457	215.46842704849	0	0	0	0	0	0	0	0	0	0	0	0
A09-Ch5		[none]	[none]			83.59	429.0374139463	1.22553083365182	559.652478275854	0	0	0	0	0	0	0	0	0	0	0	0
A10-Ch3		[none]	[none]			74.42	136.220961419696	0.662202879067138	96.0138818119721	0	0	0	0	0	0	0	0	0	0	0	0
A10-Ch5		[none]	[none]			83.17	197.71357735206	1.39731790312962	294.056470603606	0	0	0	0	0	0	0	0	0	0	0	0
A11-Ch3		[none]	[none]			90.2	50.2757576882662	0.0294375449180603	10.0551515376534	0	0	0	0	0	0	0	0	0	0	0	0
A11-Ch5		[none]	[none]			84.11	640.071872635954	1.4072530534578	958.73805334128	0	0	0	0	0	0	0	0	0	0	0	0
A12-Ch3		[none]	[none]			76.52	157.588022632649	0.481485295106471	80.7616635564488	0	0	0	0	0	0	0	0	0	0	0	0
A12-Ch5		[none]	[none]			83.83	592.73159644671	1.26910493348348	800.671986067709	0	0	0	0	0	0	0	0	0	0	0	0
A13-Ch3		[none]	[none]			87.07	39.8817458373397	0.593719353090227	25.2031247872349	0	0	0	0	0	0	0	0	0	0	0	0
