# Supplementary material for: Genome-wide identification of gene families related to miRNA biogenesis in Mangifera indica L. and their possible role during heat stress
Source: PeerJ. 2024 Jul 17;12:e17737. doi: 10.7717/peerj.17737 (PMC11260077; doi:10.7717/peerj.17737)
Supplement: Supplemental Information 18 [file peerj-12-17737-s018.xlsx]

## Sheet: General Info
General Info
Ord File Name	C:\Users\Propietario\Documents\Andrés\Corrida final Controles DCL3A 15 jul 2018.ord
Software Version	2.2.250.602
Instrument Name	PR0961400539
Instrument Serial	PR0961400539
Instrument Version	PCR 2.3.2, RT 1.1.12.23
Used Data Step	1
Sample Group	Default
Protocol Log	StartTime: 15/07/2018 11:47:48 a.m.
	RunTime: 01:20:39
	Path: /SHARED/PCPTP
	No errors

## Sheet: Plate
Well	Fluorophore	Sample Type	Target	Description	Quantity	AD Std Value	Replicate	Sample Name		Sample Group	Default
A01-Ch1	[none]	[none]			0						A1
A01-Ch2	[none]	[none]			0						A2
A01-Ch3	ROX	Unknown	DCL3A		0						A3
A01-Ch4	[none]	[none]			0						A4
A01-Ch5	SYBR	Unknown	DCL3A		0						A5
A02-Ch1	[none]	[none]			0						A6
A02-Ch2	[none]	[none]			0						A7
A02-Ch3	ROX	Unknown	DCL3A		0						A8
A02-Ch4	[none]	[none]			0						A9
A02-Ch5	SYBR	Unknown	DCL3A		0						A10
A03-Ch1	[none]	[none]			0						A11
A03-Ch2	[none]	[none]			0						A12
A03-Ch3	ROX	Unknown	DCL3A		0						A13
A03-Ch4	[none]	[none]			0						A14
A03-Ch5	SYBR	Unknown	DCL3A		0						A15
A04-Ch1	[none]	[none]			0						A16
A04-Ch2	[none]	[none]			0						B1
A04-Ch3	ROX	Unknown	DCL3A		0						B2
A04-Ch4	[none]	[none]			0						B3
A04-Ch5	SYBR	Unknown	DCL3A		0						B4
A05-Ch1	[none]	[none]			0						B5
A05-Ch2	[none]	[none]			0						B6
A05-Ch3	ROX	Unknown	DCL3A		0						B7
A05-Ch4	[none]	[none]			0						B8
A05-Ch5	SYBR	Unknown	DCL3A		0						B9
A06-Ch1	[none]	[none]			0						B10
A06-Ch2	[none]	[none]			0						B11
A06-Ch3	ROX	Unknown	DCL3A		0						B12
A06-Ch4	[none]	[none]			0						B13
A06-Ch5	SYBR	Unknown	DCL3A		0						B14
A07-Ch1	[none]	[none]			0						B15
A07-Ch2	[none]	[none]			0						B16
A07-Ch3	ROX	Unknown	DCL3A		0						C1
A07-Ch4	[none]	[none]			0						C2
A07-Ch5	SYBR	Unknown	DCL3A		0						C3
A08-Ch1	[none]	[none]			0						C4
A08-Ch2	[none]	[none]			0						C5
A08-Ch3	ROX	Unknown	DCL3A		0						C6
A08-Ch4	[none]	[none]			0						C7
A08-Ch5	SYBR	Unknown	DCL3A		0						C8
A09-Ch1	[none]	[none]			0						C9
A09-Ch2	[none]	[none]			0						C10
A09-Ch3	ROX	Unknown	DCL3A		0						C11
A09-Ch4	[none]	[none]			0						C12
A09-Ch5	SYBR	Unknown	DCL3A		0						C13
A10-Ch1	[none]	[none]			0						C14
A10-Ch2	[none]	[none]			0						C15
A10-Ch3	ROX	Unknown	DCL3A		0						C16
A10-Ch4	[none]	[none]			0						D1
A10-Ch5	SYBR	Unknown	DCL3A		0						D2
A11-Ch1	[none]	[none]			0						D3
A11-Ch2	[none]	[none]			0						D4
A11-Ch3	ROX	Unknown	DCL3A		0						D5
A11-Ch4	[none]	[none]			0						D6

## Sheet: Protocol
Reaction volume	10		Channel in use:
Consumable	1		Ch 1	No
Ramp rate	7		Ch 2	No
Heated lid ON	True		Ch 3	Yes (ROX)
Heated lid temperature	105		Ch 4	No
			Ch 5	Yes (SYBR)
	No	Cycle	Type	Information
	1		Temperature	Temp.: 95°C; Time:07:00
	2		Cycle	Number of cycles to loop:40; Number of steps inside loop:2
	3	*	. Temperature	Temp.: 95°C; Time:00:05
DA	4	*	. Temperature	Temp.: 60°C; Time:00:30; Data acquisition:True
	5		Temperature	Temp.: 60°C; Time:00:30
	6		Melting Curve	Start temperature:60°C; End temperature:95°C; Hold time:00:01; Temperature increment after hold:0.2°C
	7		Temperature	Temp.: 20°C; Time:00:10

## Sheet: Acquired Data 1
Data step:	4			Show channel:	Thresholds:
Sample Group:	Default		Ch 1	No
Method:	Threshold		Ch 2	No
Smoothing:	ON		Ch 3	No
Smoothing window:	5		Ch 4	No
Baseline:	Trend		Ch 5	Yes	170.38
Baseline range start:	3
Baseline range end:	7
Channel	Cycle	Temp	A1	A2	A3	A4	A5	A6	A7	A8	A9	A10	A11	A12	A13	A14	A15	A16	B1	B2	B3	B4	B5	B6	B7	B8
5	1	60	-5.61	-5.11	-4.32	-5.03	-4.12	-4.65	-4.08	-3.36	-4.6	4.96	-10.17	-5.72	-5.06	-5.37	-5.24	-0.48	-5	-3.3	-4.18	-1.44	-3.43	-2.84	-2.62	-5.22
5	2	60	-2.24	-1.19	-2.22	-2.49	-2.44	-1.31	-2	-0.86	-1.57	6.32	-8.52	-1.78	-2.52	-2.89	-2.02	1.47	-2.47	-1.91	-2.42	-0.94	-1.45	-2.51	-1.4	-2.39
5	3	60	0.72	1.89	0.31	0.24	0	1.37	0.26	1.37	1.05	7.93	-6.02	1.38	0.21	-0.08	1.14	4.54	-0.01	-0.12	-0.19	0.47	0.64	-0.94	0.33	0.51
5	4	60	3.58	4.22	3.53	3.42	3.52	3.87	3.04	3.38	3.62	10.18	-1.87	4.04	3.53	3.67	4.54	9.81	2.05	2.31	3.24	3.13	2.94	2.38	2.86	4.02
5	5	60	4.34	4.85	4.37	5.11	5.65	4.38	4.41	3.68	4.56	10.78	0.07	5.84	4.34	5.51	5.75	10.64	4.72	3.84	4.4	3.9	4.3	5.31	3.34	4.98
5	6	60	3.41	3.06	4.81	4.84	5.24	3.63	3.88	3.4	3.73	10.29	0.46	6.02	4.02	4.86	3.77	9.33	4.17	2.91	3.8	3.67	4.26	3.91	3.61	4.58
5	7	60	1.93	1.25	1.98	2.33	2.17	3.56	2.08	1.61	2.21	9.15	0.54	4.51	1.46	2.8	1.48	6.77	2.61	2.3	1.87	1.04	2.7	2.41	1.54	1.89
5	8	60	1.63	-0.07	1.54	0.69	0.35	2.01	0.69	0.15	0.74	7.57	0.22	1.18	1.38	1.17	-0.39	5.82	1.2	0.14	0	-0.48	0.31	0.46	0.6	-0.26
5	9	60	-0.08	-0.62	-0.46	-0.49	-1.39	-0.35	-0.86	-0.86	-1.36	5.23	-1.39	-1.44	0.2	-0.58	-0.78	3.61	-0.51	-2.69	-1.39	-3.15	-1.5	-0.65	-1.24	-1.95
5	10	60	0.16	-0.38	-0.42	-0.55	-0.14	-1.98	-0.69	-1.28	-1.41	4.11	-1.89	-0.88	0.07	-0.13	-0.58	3.24	-0.57	-2.58	-0.44	-1.58	-0.83	-0.53	-0.93	0.13
5	11	60	-0.68	0.23	-1.61	-1.23	0.66	-2.03	0.12	-0.6	-1.34	3.69	-0.62	-1.31	-0.6	-0.09	-0.11	3.82	-0.06	0.01	0.24	-0.75	-0.86	0.55	-0.54	0.72
5	12	60	-1.52	-1.43	-2.21	-1.91	-0.72	-1.9	-1.13	-2.06	-0.79	2.39	-1.16	-1.89	-0.95	-1.19	-1.54	2.26	0.83	0.4	0.26	-0.18	-1.44	-0.37	-0.55	-1
5	13	60	-1.02	-1.5	-1.49	-0.98	-1.71	-0.83	-1.1	-1.23	-0.65	2.78	1.12	-2.16	-0.93	-0.67	-0.83	1.41	0.31	0.39	-0.12	-0.12	-1.25	-0.58	-0.04	-1.52
5	14	60	-0.66	-1.42	-1.23	-0.81	-3.19	-2.2	-1.36	-2.36	-1.28	1.25	1.43	-2.11	-0.78	-0.97	-1.02	0.59	-0.59	0.13	-0.6	-0.09	-0.65	-1.65	-1.82	-1
5	15	60	-2.17	-1.44	-1.67	-1.53	-2.84	-3.07	-1.4	-1.78	-1.84	-0.36	1.54	-3.49	-1.75	-2.62	-2.3	0.68	-2.03	-0.21	-1.94	-1.7	-2.42	-2.89	-2.71	-0.64
5	16	60	-5.35	-4.72	-4.08	-5.16	-5.44	-5.34	-5.16	-4.41	-4.14	-4.25	-2.3	-6.55	-4.1	-6.05	-5.47	-2.88	-4.71	-3.09	-4.39	-4.65	-4.84	-4.81	-5.12	-4.88
5	17	60	-1.61	-3.24	-2.03	-2.36	-2.21	-1.68	-2.5	-1.97	-2.19	-0.64	1.61	-3.68	-2.46	-2.24	-2.82	-0.47	-2.92	-1.22	-2.58	-2.59	-2.43	-1.92	-3.22	-3.3
5	18	60	0.35	-2.61	-2.24	-0.83	-1.61	-1.55	-0.85	-1.85	-1.56	0.63	3.02	-2.15	-0.82	-0.84	-1.06	0.04	-2.09	-0.03	-1.03	-1.84	-0.47	-0.57	-0.95	-2.15
5	19	60	1.34	-0.29	-0.19	2.15	1.01	0.85	1.69	0.29	0.44	3.28	5.36	0.29	0.57	0.41	1.21	2.83	0.07	1.67	1.17	0.39	0.77	0.67	1.71	1.68
5	20	60	-1.02	-0.91	-0.46	-0.75	-0.12	-1.32	0.56	0.22	-0.21	1.36	4.9	-0.66	-0.18	-1.46	-0.77	-0.34	-0.56	-0.06	-0.16	-0.37	-1.11	-1.2	1.26	0.22
5	21	60	-2.01	-0.62	-0.13	-1.59	-1.51	-1.95	-1.2	0.94	-0.51	0.56	6.73	-1.36	-1.93	-2.31	-1.42	-0.55	-0.97	-1.19	-0.55	-1.11	-1.55	-2.32	-0.75	-1.06
5	22	60	1.42	1.97	2.49	1.64	0.53	-0.13	-0.26	3.11	0.84	1.23	10.73	0.55	0.05	-0.23	0.88	1.33	0.57	2.32	1.39	-0.08	0.37	-0.12	1.94	1.27
5	23	60	5.12	3.68	5.74	5.29	2.64	3.19	1.81	4.49	2.34	1.98	13.17	2.67	2.54	3.83	3.41	3.04	2	5.46	3.63	2.56	2.29	3.43	4.68	5.37
5	24	60	8.61	4.39	6.53	6.76	3.74	4.61	4.06	5.69	3.9	1.37	13.86	3.37	3.7	5.47	4.16	1.49	3.99	7.42	5.12	4.04	3.15	3.2	7.77	8.26
5	25	60	8.31	3.26	7.1	4.4	1.94	2.82	2.84	4.77	3.57	-2.02	11.51	1.01	1.66	3.68	3.4	-1.68	3.72	7.41	4.7	0.78	0.6	0.23	8.32	8.55
5	26	60	16.1	7.58	15.89	7.18	5.14	5.82	3.68	8.89	5.81	-1.43	13.74	2.37	5.51	6.23	7.05	-2.59	8.47	14.23	7.36	0.52	0.82	1.36	15.12	16.32
5	27	60	30.82	14.46	32.7	11.49	10.25	10.25	6.9	13.62	9.57	-1.7	14.36	1.94	12.43	13.61	14.18	-3.4	15.1	23.16	11.3	0.55	1.07	3.81	26.3	29.39
5	28	60	64.58	30.05	63.17	24.09	21.45	20.69	15.87	25.69	20.59	-1.03	16.89	3.34	26.6	29.37	31.84	-0.35	33.73	43.23	21.45	3.43	3.67	10.07	52.07	58.46
5	29	60	126.57	61.52	119.5	44.6	42.95	40.78	31.85	49.17	41.18	-0.38	18.27	7.9	54.45	59.95	63.63	1.49	66.73	83.52	41.1	6.38	6.46	22.03	100.85	114.51
5	30	60	234.67	118.55	217.59	83.48	80.19	78.34	56.39	92.22	76.97	1.01	19.72	14.78	106.47	114.57	120.28	0.31	126.86	156.92	77.48	11.95	10.9	42.46	186.29	213.21
5	31	60	404.89	219.27	374.82	153.69	151.18	145.81	104.01	171.5	142.94	1.88	21.24	25.15	194.95	212.91	220.48	-0.47	231.18	281.11	141.76	21.1	20.35	79.29	327.13	373.76
5	32	60	615.9	371.54	569.31	273.21	270.27	259.78	184.98	303.07	251.82	3.49	22.99	44.72	324.78	363.64	370.18	1.32	390.7	462.05	246.06	38.62	37.67	144.46	515.3	589.21
5	33	60	819.46	568.54	760.06	455.74	461.26	443.47	309.48	503.5	413.22	8.62	25.1	83.1	483.71	565.85	555.92	1.39	590.8	678.53	395.52	71.56	74.03	265.72	714.16	818.52
5	34	60	956.77	749.73	891	667.58	688.68	667.55	450.09	728.92	587.27	15.86	27.34	154.24	624.05	764.68	721.69	0.66	768.07	861.98	549.76	132.94	136.07	447.11	860.33	990.09
5	35	60	1030.85	869.12	960.61	844.18	885.23	864.15	566.91	911.6	723.04	25.72	28.14	269.08	710.91	899.08	826.62	-1.84	881.3	974.33	663.64	234.94	234.17	651.24	942.42	1082.21
5	36	60	1072.51	934.88	997.34	956.2	1013.73	998.35	642.51	1025.46	806.37	45.87	29.35	441.08	757.81	976.43	883.87	-1.49	944.06	1037.6	730.64	394.18	376.86	827.03	987.91	1132.62
5	37	60	1107.15	976.63	1029.42	1022.51	1088.92	1077.09	687.97	1095.28	856.37	87.1	31.53	628.83	792.57	1025.61	924.4	2.54	984.53	1078.05	772.29	587.7	535.45	943.85	1022.97	1169.75
5	38	60	1136.57	1015.33	1058.52	1068.08	1140.45	1130.33	719.6	1145.5	891.26	156.45	33.93	781.6	820.83	1065.4	958.58	11.52	1015.68	1111.55	801.92	762.27	665.28	1016.09	1053.27	1202.62
5	39	60	1160.09	1041.47	1080.44	1101.45	1177.04	1168.4	744.58	1181.05	920.5	245.05	36.12	878.54	840.84	1092.69	982.21	26.28	1042.51	1139.11	825.02	876.37	749.58	1069.33	1075.5	1226.39
5	40	60	1177.53	1056.35	1095.74	1119.25	1195.11	1187.15	760.19	1199.08	940.42	355.11	37.86	924.35	851.77	1105.63	994.85	46.1	1062.55	1159.35	839.42	940.6	792.46	1096.6	1089.84	1240.8

## Sheet: Cq Results
Data step:	4			Show channel:	Thresholds:
Sample Group:	Default		Ch 1	No
Method:	Threshold		Ch 2	No
Smoothing:	ON		Ch 3	No
Smoothing window:	5		Ch 4	No
Baseline:	Trend		Ch 5	Yes	170.38
Baseline range start:	3
Baseline range end:	7
Well	Replicate	Fluorophore	Sample Type	Sample Name	Target	Cq	Quantity	Omitted	Description
A01-Ch5		SYBR	Unknown		DCL3A	29.41	NeuN
A02-Ch5		SYBR	Unknown		DCL3A	30.51	NeuN
A03-Ch5		SYBR	Unknown		DCL3A	29.52	NeuN
A04-Ch5		SYBR	Unknown		DCL3A	31.14	NeuN
A05-Ch5		SYBR	Unknown		DCL3A	31.16	NeuN
A06-Ch5		SYBR	Unknown		DCL3A	31.22	NeuN
A07-Ch5		SYBR	Unknown		DCL3A	31.82	NeuN
A08-Ch5		SYBR	Unknown		DCL3A	30.99	NeuN
A09-Ch5		SYBR	Unknown		DCL3A	31.25	NeuN
A10-Ch5		SYBR	Unknown		DCL3A	38.16	NeuN
A11-Ch5		SYBR	Unknown		DCL3A	NeuN	NeuN
A12-Ch5		SYBR	Unknown		DCL3A	34.14	NeuN
A13-Ch5		SYBR	Unknown		DCL3A	30.72	NeuN
A14-Ch5		SYBR	Unknown		DCL3A	30.57	NeuN
A15-Ch5		SYBR	Unknown		DCL3A	30.5	NeuN
A16-Ch5		SYBR	NTC		DCL3A	NeuN	0
B01-Ch5		SYBR	Unknown		DCL3A	30.42	NeuN
B02-Ch5		SYBR	Unknown		DCL3A	30.11	NeuN
B03-Ch5		SYBR	Unknown		DCL3A	31.27	NeuN
B04-Ch5		SYBR	Unknown		DCL3A	34.37	NeuN
B05-Ch5		SYBR	Unknown		DCL3A	34.35	NeuN
B06-Ch5		SYBR	Unknown		DCL3A	32.21	NeuN
B07-Ch5		SYBR	Unknown		DCL3A	29.81	NeuN
B08-Ch5		SYBR	Unknown		DCL3A	29.57	NeuN
B09-Ch5		SYBR	Unknown		DCL3A	29.66	NeuN
B10-Ch5		SYBR	Unknown		DCL3A	30.08	NeuN

## Sheet: Melt Curve Data
Sample Group:	Default		Show channel:
Smoothing:	ON		Ch 1	No
Smoothing window:	9		Ch 2	No
Low limit	63.5		Ch 3	Yes
High limit	91.5		Ch 4	No
Max # of peaks:	1		Ch 5	Yes
Peak threshold:	10
Slope Correction:	Yes
Derivative:	Negative
Temp	Channel	A1	A2	A3	A4	A5	A6	A7	A8	A9	A10	A11	A12	A13	A14	A15	A16	B1	B2	B3	B4	B5	B6	B7	B8	B9
60	3	54.11	42.26	42.61	21.73	31.5	26.66	37.95	30.03	39.8	30.54	78.33	30.57	43.53	31.15	18.33	45.5	43.81	40.96	21.47	28.06	43.52	35.21	24.43	35.18	16.65
60	5	1257.76	1137.47	1166.01	1204.39	1288.73	1277.71	822.07	1290.67	1005.78	428.33	74.08	1050.12	914.43	1187.94	1077.56	129.09	1140.62	1231.8	918.79	1041.79	861.59	1209.89	1165.74	1325.67	1226.84
60.2	3	52.43	41.88	41.18	21.92	30	24.9	36.8	30.27	39.39	30.27	79.16	29.65	42.5	30.99	19.95	43.44	44.65	38.68	18.6	28.37	40.3	35.85	23.59	34.34	17.39
60.2	5	1253.86	1135.87	1162.99	1201.12	1285.32	1272.64	816.05	1284.84	1000.34	424.23	72.73	1052.53	907.57	1183.13	1074.41	127.05	1137.79	1228.44	917.9	1041.93	857.59	1207.45	1162.74	1319.87	1220.71
60.4	3	51.09	41.7	40.08	22.18	28.86	23.57	35.7	30.44	38.82	29.96	80.27	29.04	41.68	30.8	21.14	41.93	45.24	37.09	16.57	28.58	37.81	36.27	23.1	33.78	18.05
60.4	5	1249.31	1133.42	1159.45	1197.51	1281.69	1267.69	810.04	1279.11	994.58	419.92	71.49	1053.94	900.81	1178.52	1071.4	125.06	1134.47	1224.71	916.64	1041.34	852.97	1204.5	1159.61	1314.02	1214.98
60.6	3	50.08	41.73	39.31	22.53	28.09	22.67	34.64	30.55	38.09	29.61	81.65	28.76	41.09	30.58	21.92	40.98	45.58	36.2	15.37	28.67	36.05	36.47	22.97	33.49	18.65
60.6	5	1244.12	1130.14	1155.39	1193.53	1277.86	1262.84	804.04	1273.47	988.53	415.4	70.36	1054.34	894.15	1174.12	1068.52	123.15	1130.64	1220.63	915.02	1040.01	847.72	1201.04	1156.34	1308.12	1209.63
60.8	3	49.42	41.98	38.89	22.96	27.68	22.19	33.63	30.61	37.18	29.22	83.29	28.8	40.72	30.32	22.27	40.58	45.68	36	15.01	28.66	35.02	36.46	23.2	33.48	19.17
60.8	5	1238.28	1126.01	1150.82	1189.21	1273.81	1258.1	798.04	1267.91	982.16	410.66	69.32	1053.74	887.59	1169.91	1065.77	121.29	1126.32	1216.2	913.04	1037.94	841.85	1197.07	1152.94	1302.17	1204.67
61	3	50.65	43.42	39.21	23.68	28.21	23.08	32.75	30.79	36.17	29.26	86.14	29.05	41.4	30.44	22.64	41.72	44.66	37.12	16.58	28.31	35.83	36.92	24.33	34.61	20.61
61	5	1230.86	1119.73	1144.45	1182.94	1269.5	1253.16	791.63	1262.23	974.53	405.25	68.59	1051.17	880.85	1165.58	1061.72	119.41	1121.8	1211.84	910.19	1034.48	833.98	1191.33	1149.27	1294.75	1200.25
61.2	3	49.48	44.66	39.23	25.32	28.78	23.07	31.39	30.14	34.04	27.78	86.78	29.29	42.17	29.33	20.77	42.67	44.41	37.97	17	28.21	36.04	35.29	24.61	34.77	20.57
61.2	5	1225.78	1115.21	1141	1179.68	1266.44	1249.6	786.48	1257.31	969	401.07	67.69	1050.55	876.06	1163.52	1061.51	117.82	1117.67	1206.43	906.84	1030.87	828.33	1188.02	1147.01	1290.34	1196.87
61.4	3	49.31	43.78	40.65	26.02	29.77	23.65	31.36	30.74	33.66	26.86	89.37	29.83	41.91	28.72	20.69	43.05	45.55	40.43	17.8	28.19	35.3	35.43	24.97	34.41	19.86
61.4	5	1221.24	1112.18	1136.92	1177.22	1263.57	1247.05	782.38	1254.82	965.19	397.65	67.23	1049.47	871.66	1162.49	1060.79	116.66	1112.67	1202.13	905.82	1030.11	823.09	1185.57	1144.84	1288.56	1195
61.6	3	49.55	43.54	40.62	25.95	30.49	24.02	30.41	30.65	33.56	26.61	92.29	31.54	41	28.99	21.43	41.9	46.62	41.33	18.84	29.41	34.67	35.61	26.62	34.56	19.57
61.6	5	1214.52	1107.47	1131.97	1173.92	1257.49	1242.04	776.72	1248.31	957.8	392.45	66.79	1046.31	864.83	1159.47	1058.63	115.81	1107.33	1197.06	904.68	1025.8	816.65	1181.32	1141.18	1283.32	1190.56
61.8	3	50	43.25	40.05	26.62	31.01	23.44	29.98	30.71	33.04	26.03	95.89	31.74	37.67	27.42	21.65	42.12	46.11	41.03	18.97	30.75	34.6	34.88	26.42	34.26	19.65
61.8	5	1209.34	1104.5	1128.92	1169.97	1253.9	1238.19	772.23	1243.76	952.37	387.98	66.06	1042.22	859.96	1157.08	1056.63	114.29	1103.19	1192.94	905.41	1023.1	811.06	1175.93	1137.17	1279.99	1187.85
62	3	50.02	41.96	39.97	26.55	31.83	23.04	29.43	30.24	32.03	25.7	99.91	30.19	36.22	26.68	22.51	40.55	45.04	39.71	18.17	30.78	34.06	34.07	25.81	34.01	17.94
62	5	1201.07	1099.71	1124.03	1163.88	1247.6	1230.6	766.15	1237.54	945.94	384.12	65.44	1037.82	854.75	1153.22	1055.21	112.85	1097.19	1185.29	903.33	1019.02	804.44	1169.12	1131.47	1273.21	1183.19
62.2	3	49.18	40.74	39.2	26.39	31.22	22.41	27.96	29.35	30.94	24.41	103.95	29.54	34.35	27.54	22.72	37.64	44.71	38.69	17.31	32.08	33.51	34.5	24.42	33.78	18.39
62.2	5	1195.42	1095.94	1119.76	1158.29	1240.97	1223.91	760.66	1230.31	938.02	379.08	64.36	1032.79	848.05	1146.79	1049.33	111.73	1092.09	1179.42	901	1014.48	798.5	1161.7	1126.33	1266.01	1177.66
62.4	3	45.09	41.3	36.18	25.3	28.74	20.52	26.01	28.28	29.11	23.28	108.56	27.83	32.57	27.35	21.32	35.01	43.42	35.75	17.38	30.87	31.42	32.45	21.94	31.31	18.58
62.4	5	1190.23	1092.04	1115.61	1155.29	1234.85	1218.58	756.41	1223.09	931.8	375.39	64.33	1027.97	840.78	1141.98	1043.92	111.55	1088.82	1175.18	901	1010.43	792.39	1154.62	1121.89	1258.41	1173.22
62.6	3	42.76	40.97	34.64	24.05	27.1	19.83	25.25	27.07	28.43	22.96	115.67	26.71	31.41	27.95	18.65	34.25	41.02	34.85	18.6	28.46	30.27	30.39	21.3	30.35	18.8
62.6	5	1184.78	1087.36	1111.49	1151.51	1229.92	1215.47	752.17	1218.49	925.8	371.36	64.94	1022.7	835.9	1137.3	1040.62	110.83	1085.46	1171.15	900.37	1007.95	787.19	1149	1119.63	1251.53	1170.47
62.8	3	41.82	41.72	33.49	25.51	26.3	20.07	24.73	27.1	27.81	21.28	125.18	26.45	30.92	28.12	18.71	33.01	41.48	35.48	19.97	28.88	30.04	28.94	20.75	29.96	18.61
62.8	5	1183.27	1087.83	1111.2	1151.96	1229.21	1215.36	750.74	1216.62	924.23	369.75	65.93	1021.55	833.95	1137.47	1041.67	110.73	1086.24	1169.02	901.2	1007.88	784.07	1146.32	1121.03	1250.31	1170.92
63	3	43.03	39.26	33.46	26.9	26.16	21.77	24.65	26.76	27.73	20.73	138.63	26.09	31.01	29.81	19.52	33.03	42.48	36.97	20.5	28.8	29.18	28.77	21.29	29.33	18.66
63	5	1184.66	1090.04	1111.57	1153.65	1230.69	1217.96	750.08	1216.96	924.14	368.78	67.41	1021.55	832.27	1139.22	1042.41	110.98	1086.66	1168.98	904.2	1009.23	782.8	1146.68	1124.68	1251.76	1174.38
63.2	3	46.24	41.16	33.95	29.35	26.74	24.49	24.49	26.52	29.33	22.19	155.07	27.39	32.01	31.45	21.62	32.93	43.35	38.79	22.16	30.03	28.77	29.51	22.66	29.44	19.51
63.2	5	1183.88	1088.97	1111.23	1154.03	1228.77	1218.33	746.95	1215.26	920.38	366.36	67.6	1018.96	828.85	1137.8	1042.89	110.61	1084.23	1166.8	905.29	1006.24	779.39	1144.02	1124.88	1249.26	1176.05
63.4	3	46.79	40.21	33.44	30.63	26.27	25.08	24.39	26.17	28.5	22.25	172.45	27.82	31.68	29.35	23.9	34.52	42.17	38.91	23.13	30.95	29.51	29.26	23.4	29.1	19.88
63.4	5	1182.11	1087.43	1110.35	1152.22	1227.96	1218.5	744.34	1213.08	918.33	364.27	67.19	1014.99	826.64	1134.81	1042.23	109.99	1081.72	1163.76	906.7	1004.39	776.07	1140.7	1124.09	1246.71	1176.64
63.6	3	47.62	38.87	33.46	29.6	25.08	24.49	22.9	24.58	27.18	20.94	190.48	27.08	32.51	28.01	23.22	33.75	41	37.99	22.94	29.63	28.9	28.03	22.86	27.96	19.54
63.6	5	1175.84	1081.67	1106.39	1145.81	1222.61	1212.75	739.11	1206.17	912.69	360.17	65.75	1008.58	821.79	1127.67	1038.7	108.95	1076.28	1157.58	904.97	999.4	769.8	1134.16	1118.31	1241.29	1172.21
63.8	3	45.93	36.93	32.9	27.92	23.37	22.09	20.48	23.43	24.19	19.38	208.37	24.21	31.43	25.95	21.75	30.79	40.32	36.9	22.85	29.18	27.83	26.8	21.19	27.42	19.5
63.8	5	1170.87	1076.52	1101.25	1141.33	1216.98	1208.11	734.4	1200	906.93	356.31	64.58	1003.78	817.03	1122.07	1033.74	107.42	1071.03	1152.11	903.52	993.93	764.91	1128.17	1113.29	1236.11	1168.3
64	3	40.94	35.4	30.55	24.34	20.83	19.76	18.55	21.85	21.38	17.89	225.02	20.85	29.16	23.05	19.47	28.56	38.23	33.8	21.66	26.74	23.96	24.55	18.98	25.65	16.86
64	5	1165.36	1070.74	1096.24	1137.42	1210.75	1203.64	730.42	1193.36	901.9	353.3	63.94	998.51	812.15	1116.11	1029.87	106.32	1066.38	1147.49	902.98	989.86	760.63	1122.71	1108.91	1229.18	1163.78
64.2	3	38.5	34.35	31.59	22.03	20.48	18.86	18.28	20.85	19.98	16.91	244.02	19.34	27.57	22.31	17.04	29.34	36.19	32.13	20.4	24.49	21.37	22.49	16.94	24.37	16.08
64.2	5	1160.35	1066.04	1090.78	1132.89	1204.68	1198.33	725.7	1187.92	896.61	349.7	63.81	993.06	808.27	1110.6	1027.43	105.28	1062.08	1141.91	900.68	986.51	756.17	1117.44	1105.83	1222.63	1160.25

## Sheet: Melting curve Results
Sample Group:	Default		Show channel:
Smoothing:	ON		Ch 1	No
Smoothing window:	9		Ch 2	No
Low limit	63.5		Ch 3	Yes
High limit	91.5		Ch 4	No
Max # of peaks:	1		Ch 5	Yes
Peak threshold:	10
Slope Correction:	Yes
Derivative:	Negative
Well	Replicate	Fluorophore	Sample Type	Sample Name	Target	Melt Temp 1	Peak Height 1	FW/HM Peak 1	Area Peak 1	Melt Temp 2	Peak Height 2	FW/HM Peak 2	Area Peak 2	Melt Temp 3	Peak Height 3	FW/HM Peak 3	Area Peak 3	Melt Temp 4	Peak Height 4	FW/HM Peak 4	Area Peak 4	Description
A01-Ch3		ROX	Unknown		DCL3A	91.16	109.451479316862	0.283635069322586	33.0589812117866	0	0	0	0	0	0	0	0	0	0	0	0
A01-Ch5		SYBR	Unknown		DCL3A	79.38	559.549027232535	2.02863071390244	1208.20370809285	0	0	0	0	0	0	0	0	0	0	0	0
A02-Ch3		ROX	Unknown		DCL3A	91.15	128.683682002553	0.295264894151688	40.4421574467216	0	0	0	0	0	0	0	0	0	0	0	0
A02-Ch5		SYBR	Unknown		DCL3A	79.3400000000001	518.912858615234	2.02276088514549	1117.21820079935	0	0	0	0	0	0	0	0	0	0	0	0
A03-Ch3		ROX	Unknown		DCL3A	91.17	107.052891795212	0.278580170488358	31.780379314004	0	0	0	0	0	0	0	0	0	0	0	0
A03-Ch5		SYBR	Unknown		DCL3A	79.26	542.660145497858	1.96033141202435	1132.28681111306	0	0	0	0	0	0	0	0	0	0	0	0
A04-Ch3		ROX	Unknown		DCL3A	91.15	55.6058206344825	0.312983064472675	18.524227912244	0	0	0	0	0	0	0	0	0	0	0	0
A04-Ch5		SYBR	Unknown		DCL3A	79.4700000000002	438.542310807281	2.47506336333176	1155.30551115482	0	0	0	0	0	0	0	0	0	0	0	0
A05-Ch3		ROX	Unknown		DCL3A	91.17	109.913800552812	0.254786085748672	29.9162439063109	0	0	0	0	0	0	0	0	0	0	0	0
A05-Ch5		SYBR	Unknown		DCL3A	79.3300000000001	516.258157154576	2.35291144768072	1292.91963885033	0	0	0	0	0	0	0	0	0	0	0	0
A06-Ch3		ROX	Unknown		DCL3A	91.18	93.7691353767133	0.218107143115997	22.2796508240412	0	0	0	0	0	0	0	0	0	0	0	0
A06-Ch5		SYBR	Unknown		DCL3A	79.2700000000001	505.105872244722	2.26958077362583	1220.188939603	0	0	0	0	0	0	0	0	0	0	0	0
A07-Ch3		ROX	Unknown		DCL3A	91.15	135.049809980415	0.300263044631481	43.1613364911045	0	0	0	0	0	0	0	0	0	0	0	0
A07-Ch5		SYBR	Unknown		DCL3A	79.12	416.129741198247	1.73403541842986	768.043367196602	0	0	0	0	0	0	0	0	0	0	0	0
A08-Ch3		ROX	Unknown		DCL3A	91.17	146.831297879632	0.263493092393875	41.2805133081687	0	0	0	0	0	0	0	0	0	0	0	0
A08-Ch5		SYBR	Unknown		DCL3A	79.27	605.457501239632	1.93762311370319	1248.68240850046	0	0	0	0	0	0	0	0	0	0	0	0
A09-Ch3		ROX	Unknown		DCL3A	91.18	170.061907026048	0.234294623851776	42.9290285094195	0	0	0	0	0	0	0	0	0	0	0	0
A09-Ch5		SYBR	Unknown		DCL3A	79.26	489.160143048454	1.85265629557322	964.594858279622	0	0	0	0	0	0	0	0	0	0	0	0
A10-Ch3		ROX	Unknown		DCL3A	91.18	98.1901990431578	0.229666087245941	24.3585176342115	0	0	0	0	0	0	0	0	0	0	0	0
A10-Ch5		SYBR	Unknown		DCL3A	74.04	128.560172587371	2.60972956869319	357.109148115221	0	0	0	0	0	0	0	0	0	0	0	0
A11-Ch3		ROX	Unknown		DCL3A	65.7900000000001	63.766923236341	1.28842841378055	87.4489862315667	0	0	0	0	0	0	0	0	0	0	0	0
A11-Ch5		SYBR	Unknown		DCL3A	87.4	59.1117114304487	0.370040705019236	23.2823329766869	0	0	0	0	0	0	0	0	0	0	0	0
A12-Ch3		ROX	Unknown		DCL3A	91.17	117.838482182156	0.26194476685524	32.9407453305969	0	0	0	0	0	0	0	0	0	0	0	0
A12-Ch5		SYBR	Unknown		DCL3A	79.37	457.222837318558	2.01114771581471	978.748043968863	0	0	0	0	0	0	0	0	0	0	0	0
A13-Ch3		ROX	Unknown		DCL3A	91.12	73.124620867151	0.366629739814997	28.535523769529	0	0	0	0	0	0	0	0	0	0	0	0
