# Supplementary material for: Genome-wide identification of gene families related to miRNA biogenesis in Mangifera indica L. and their possible role during heat stress
Source: PeerJ. 2024 Jul 17;12:e17737. doi: 10.7717/peerj.17737 (PMC11260077; doi:10.7717/peerj.17737)
Supplement: Supplemental Information 19 [file peerj-12-17737-s019.xlsx]

## Sheet: General Info
General Info
Ord File Name	C:\Users\Propietario\Documents\Andrés\Corrida final tratados DCL3A 15 jul 2018.ord
Software Version	2.2.250.602
Instrument Name	PR0961400539
Instrument Serial	PR0961400539
Instrument Version	PCR 2.3.2, RT 1.1.12.23
Used Data Step	1
Sample Group	Default
Protocol Log	StartTime: 15/07/2018 02:36:48 p.m.
	RunTime: 01:20:57
	Path: /SHARED/PCPTP
	No errors

## Sheet: Plate
Well	Fluorophore	Sample Type	Target	Description	Quantity	AD Std Value	Replicate	Sample Name		Sample Group	Default
A01-Ch1	[none]	[none]			0						A1
A01-Ch2	[none]	[none]			0						A2
A01-Ch3	[none]	[none]			0						A3
A01-Ch4	[none]	[none]			0						A4
A01-Ch5	[none]	[none]			0						A5
A02-Ch1	[none]	[none]			0						A6
A02-Ch2	[none]	[none]			0						A7
A02-Ch3	[none]	[none]			0						A8
A02-Ch4	[none]	[none]			0						A9
A02-Ch5	[none]	[none]			0						A10
A03-Ch1	[none]	[none]			0						A11
A03-Ch2	[none]	[none]			0						A12
A03-Ch3	[none]	[none]			0						A13
A03-Ch4	[none]	[none]			0						A14
A03-Ch5	[none]	[none]			0						A15
A04-Ch1	[none]	[none]			0						A16
A04-Ch2	[none]	[none]			0						B1
A04-Ch3	[none]	[none]			0						B2
A04-Ch4	[none]	[none]			0						B3
A04-Ch5	[none]	[none]			0						B4
A05-Ch1	[none]	[none]			0						B5
A05-Ch2	[none]	[none]			0						B6
A05-Ch3	[none]	[none]			0						B7
A05-Ch4	[none]	[none]			0						B8
A05-Ch5	[none]	[none]			0						B9
A06-Ch1	[none]	[none]			0						B10
A06-Ch2	[none]	[none]			0						B11
A06-Ch3	[none]	[none]			0						B12
A06-Ch4	[none]	[none]			0						B13
A06-Ch5	[none]	[none]			0						B14
A07-Ch1	[none]	[none]			0						B15
A07-Ch2	[none]	[none]			0						B16
A07-Ch3	[none]	[none]			0						C1
A07-Ch4	[none]	[none]			0						C2
A07-Ch5	[none]	[none]			0						C3
A08-Ch1	[none]	[none]			0						C4
A08-Ch2	[none]	[none]			0						C5
A08-Ch3	[none]	[none]			0						C6
A08-Ch4	[none]	[none]			0						C7
A08-Ch5	[none]	[none]			0						C8
A09-Ch1	[none]	[none]			0						C9
A09-Ch2	[none]	[none]			0						C10
A09-Ch3	[none]	[none]			0						C11
A09-Ch4	[none]	[none]			0						C12
A09-Ch5	[none]	[none]			0						C13
A10-Ch1	[none]	[none]			0						C14
A10-Ch2	[none]	[none]			0						C15
A10-Ch3	[none]	[none]			0						C16
A10-Ch4	[none]	[none]			0						D1
A10-Ch5	[none]	[none]			0						D2
A11-Ch1	[none]	[none]			0						D3
A11-Ch2	[none]	[none]			0						D4
A11-Ch3	[none]	[none]			0						D5
A11-Ch4	[none]	[none]			0						D6

## Sheet: Protocol
Reaction volume	10		Channel in use:
Consumable	1		Ch 1	No
Ramp rate	7		Ch 2	No
Heated lid ON	True		Ch 3	Yes (ROX)
Heated lid temperature	105		Ch 4	No
			Ch 5	Yes (SYBR)
	No	Cycle	Type	Information
	1		Temperature	Temp.: 95°C; Time:07:00
	2		Cycle	Number of cycles to loop:40; Number of steps inside loop:2
	3	*	. Temperature	Temp.: 95°C; Time:00:05
DA	4	*	. Temperature	Temp.: 60°C; Time:00:30; Data acquisition:True
	5		Temperature	Temp.: 60°C; Time:00:30
	6		Melting Curve	Start temperature:60°C; End temperature:95°C; Hold time:00:01; Temperature increment after hold:0.2°C
	7		Temperature	Temp.: 20°C; Time:00:10

## Sheet: Acquired Data 1
Data step:	4			Show channel:	Thresholds:
Sample Group:	Default		Ch 1	No
Method:	Threshold		Ch 2	No
Smoothing:	ON		Ch 3	No
Smoothing window:	5		Ch 4	No
Baseline:	Trend		Ch 5	Yes	158.89
Baseline range start:	3
Baseline range end:	7
Channel	Cycle	Temp	A1	A2	A3	A4	A5	A6	A7	A8	A9	A10	A11	A12	A13	A14	A15	A16	B1	B2	B3	B4	B5	B6	B7	B8
5	1	60	27.62	3.8	14.67	19.84	11.5	0.57	16.01	1.26	26.17	0	0	-36.68	14.57	17.34	-17.04	0	0	34.58	51.31	21.68	2.6	56.23	55.26	49.72
5	2	60	10.63	0	2.77	7.9	2.43	0	6.02	0	29.5	27.26	0.83	-37.07	11.38	4.2	-29.2	92.34	0.12	12.72	28.19	6.62	0	27.37	35.12	31.11
5	3	60	2.11	2.81	0	3.43	0	3.71	1.23	2.26	30.51	48.89	6.79	-34.38	10.69	0	-33.06	174.86	3.09	2.1	15.21	1.12	1.97	11.02	23.75	20.13
5	4	60	0	12.21	5.99	8.89	2.37	11.77	2.34	7.87	25.96	62.2	16.34	-28.72	12.13	5.48	-27.83	252.95	7.39	5.36	13.24	5.49	8.12	6.37	23.14	16.04
5	5	60	6.56	25.21	17	12.23	12.93	19.72	4.55	15.42	25.54	74.32	33.22	-22.37	13.69	13.42	-17.13	306.82	15.88	10.11	16.21	14.57	17.24	13.94	23.67	18.97
5	6	60	15.15	27.61	15.98	11.7	12.08	18.88	4.44	15.19	23.92	80.32	60.6	-21.26	12.27	14.11	-15.22	339.99	21.58	11.03	15.93	15.4	20.45	16.45	20.68	18.06
5	7	60	10.05	15.54	4.26	0.89	1.8	7.5	0.18	4.82	15.27	77.85	110.09	-28.8	0.96	2.96	-21.39	360.04	8.84	0.4	6.18	0.54	12.08	5.18	6.87	4.32
5	8	60	13.49	17.32	5.05	0	1.53	6.8	0	4.66	12.58	81.95	203.22	-27.64	0	3.33	-20.73	374.99	6.98	0	4.1	0	12.96	0	4.95	1.54
5	9	60	15.2	22.47	7.99	2.21	4.71	7.75	0.21	8.89	13.58	87.31	336.16	-25.84	3.11	4.77	-15.57	383.97	8.16	3.76	6.69	4.56	16.41	2.51	7.87	5.82
5	10	60	20.41	27.17	14.7	7.61	7.61	11.88	1.93	11.79	15.2	91.76	492.86	-17.24	11.46	12.37	-10.31	393.8	15.04	12.34	12.36	11.64	23.92	9.42	15.05	12.39
5	11	60	27.75	26.45	16.02	7.78	7.69	13.85	4.82	14.81	17.15	95.13	627.48	-14.19	14.15	16.11	-7.14	404.76	16.86	14.73	14.03	12.98	27.03	13.14	15.39	14.31
5	12	60	35.78	32.79	20.49	14.63	12.97	20.41	10.13	19.76	17.45	104.45	719.82	-8.17	18.25	21.64	-4.26	417.79	25.07	21.3	18.52	16.29	34.72	16.97	18.92	19.84
5	13	60	39.55	36.9	23.46	19.77	18.35	24.31	15.75	22.87	19.35	111.18	771.55	-5.46	21.22	23.45	-0.32	424.37	29.11	27.1	20.5	18.4	37.87	21.95	21.21	23.71
5	14	60	44.31	38.58	25.18	23.07	24.11	26.11	17.46	25.72	19.62	117.04	804.54	2.06	25.31	27.2	3.26	429.28	32.39	33.42	25.72	22.77	43.13	26.96	25.77	28.52
5	15	60	44.28	32.69	17.46	11.84	17.25	18.37	14.07	22.53	15.57	118.22	819.97	-0.75	22.86	23.73	-0.8	428.07	24.76	27.48	20.99	18.73	40.43	21.96	19.91	19.87
5	16	60	40.64	27.84	18.81	11.55	14.37	16.15	13.1	18.54	12.03	122.1	830.39	-1.91	22.31	20.32	-5.92	428.65	22.55	26.75	18.56	16.02	41.75	19.64	16.99	15.89
5	17	60	39.95	28.81	23.62	15.54	16.03	17.24	15.66	20.82	15.04	130.8	842.89	-1.24	26.58	20.41	-0.33	433.2	25.37	30.9	19.03	17.02	44.75	21.86	18.6	18.49
5	18	60	41.73	31.93	24.13	19.31	19.41	17.94	13.91	22.72	17.18	138.53	851.74	0.87	30.39	25.46	4.53	439.89	25.94	34.72	21.95	21.48	50.51	25.42	19.88	23.34
5	19	60	40.52	31.73	18.98	15.09	15.51	15.57	13.28	17.78	13.92	143.4	852.86	0.96	30.86	27.84	2.25	444.19	19.71	29.65	21.12	18.76	49.23	22.76	15.63	19.78
5	20	60	31.16	23.92	11.07	8.63	9.37	11	11.55	11.21	10.39	142.85	850.19	1.4	29.66	18.92	-2.68	444.13	14.22	25.15	13.73	14.21	46.89	17.52	10.24	11.96
5	21	60	25.63	20.25	3.92	3.41	3.01	6.24	9.62	11.44	8.1	144.25	849.71	4.46	27.07	7.2	-6.6	442.06	16.08	26.11	7.21	8.29	43.8	12.66	4.88	3.42
5	22	60	38.84	30.3	15.35	13.81	17.03	15.26	13.13	23.75	15.85	148.81	857.66	20.14	34.65	14.56	3.47	444.84	27.64	42.18	13.94	19.43	53.7	20.25	12.64	12
5	23	60	51.44	39.13	29.47	27.53	32.02	27.58	18.76	32.24	21.46	154.09	863.24	35.72	44.38	27.57	10.64	450.09	39.57	50.08	23.62	32.01	62.6	29.94	24.03	24.99
5	24	60	57.27	44.93	35.98	31.19	39.09	34.21	18.22	35.41	25.95	156.27	863.36	47.05	48.4	32.65	14.04	453.96	42.79	54.58	24.71	37.77	67.44	36.12	28.7	33.4
5	25	60	53.49	40.72	30.25	25.54	31.2	29.57	12.62	29.8	20.54	153.31	855.71	49.47	40.87	25.23	8.29	451.83	36.58	49.98	17.78	33.07	60.51	29.01	20.2	26.97
5	26	60	54.42	41.89	30.79	26.66	32.12	28.17	13.65	27.69	18.96	154.3	852.62	55.29	39.22	27.62	10.21	451.89	35.18	52.44	16.75	31.99	59.66	28.94	19.59	26.23
5	27	60	29.08	18.18	6.94	6.54	9.39	6.7	3.7	8.68	1.84	142.76	833	37.54	23.17	9.2	-7.7	437.59	15	28.56	2.21	11.53	41.24	9.25	1.77	2.01
5	28	60	23.84	16.63	0.66	2.25	7.76	3.28	1.26	8.09	0	140.26	827.98	40.59	18.54	8.96	-10.51	432.35	15.67	30.07	0	8.85	38.27	14.3	0	0
5	29	60	35.8	22.21	9.81	11.38	17.99	11.86	5.23	16.11	5.11	144.94	833	56.73	23.32	14.67	-0.3	433.78	25.31	40.06	9	17.58	44.98	26.97	8.21	9.3
5	30	60	58.25	40.11	29.4	32.47	39.59	30.94	14.9	32.11	17.4	158.68	848.19	79.87	41.24	36.86	20.26	448.41	43.22	63.25	26.66	36.18	62.26	48.2	27.85	29.95
5	31	60	56.07	38.29	27.38	32.11	33.68	27.79	11.32	30.7	14.68	158.45	842.79	77.94	39.99	36.8	18.18	447.8	39.07	61.61	25.84	32.54	60.74	46.47	27.18	28.02
5	32	60	60.08	46.62	31.35	39.66	40.18	32.03	13.86	37.73	18.35	162.69	844.28	84.26	45.66	46.27	24.87	449.34	44.6	69.07	29.57	39.9	68.14	55.72	33.6	36.91
5	33	60	67.9	55.96	39.7	44.69	47.35	38.66	17.09	44.29	20.56	166.18	841.62	92.4	49.73	50.68	30.79	449.43	52.8	74.08	33.81	46.84	74.74	65.31	39.54	44.6
5	34	60	72.77	61.52	44.8	48.76	53.15	44.5	21.18	47.46	22.49	168.75	839.54	98.66	56.19	53.8	36.68	453.93	56.78	81.02	37.71	50.64	77.48	68.75	41.92	48.38
5	35	60	64.96	52.94	36.51	39.26	42.19	38.65	16.97	39.18	16.9	162.54	829.72	94.88	50.43	44.89	27.91	447.3	49.85	74.63	31.29	43.28	69.76	61.08	32.89	39.84
5	36	60	69.28	54.6	38.22	44.22	45.47	42.1	20.95	40.58	19.23	166.52	832.81	102.63	55.23	50.87	31.49	448.26	51.64	78.02	33.53	46.21	76.88	64.23	36.14	43.06
5	37	60	71.17	55.43	39.09	47.02	52.78	48.85	24.19	44.9	20.55	171.33	834.17	109.82	59.92	60.01	34.02	449.74	55.66	81.47	36.73	52.8	83.33	71.46	43.79	49.27
5	38	60	64.2	51.17	33.83	43.39	51.09	42.04	21.58	42.21	15.09	168.89	827.74	108.69	56.43	54.17	28.62	447.76	50.45	75.73	32.35	47.27	78.03	68.98	39.59	42.68
5	39	60	58.93	47.89	30.75	40.37	46.94	37.28	18.81	36.41	11.16	166.14	823.68	108.26	52.79	47.77	28.04	445.23	46.75	73.57	29.13	42.05	74.11	64.26	35.6	36.84
5	40	60	51.22	42.61	26.13	34.22	36.75	29.43	13.24	25.3	5.63	159.98	818.29	104.78	45.65	35.46	27.62	439.92	40.53	69.93	23.51	33.28	66.67	54.2	27.3	26.65

## Sheet: Cq Results
Data step:	4			Show channel:	Thresholds:
Sample Group:	Default		Ch 1	No
Method:	Threshold		Ch 2	No
Smoothing:	ON		Ch 3	No
Smoothing window:	5		Ch 4	No
Baseline:	Trend		Ch 5	Yes	158.89
Baseline range start:	3
Baseline range end:	7
Well	Replicate	Fluorophore	Sample Type	Sample Name	Target	Cq	Quantity	Omitted	Description
A01-Ch5		[none]	[none]			NeuN	0
A02-Ch5		[none]	[none]			NeuN	0
A03-Ch5		[none]	[none]			NeuN	0
A04-Ch5		[none]	[none]			NeuN	0
A05-Ch5		[none]	[none]			NeuN	0
A06-Ch5		[none]	[none]			NeuN	0
A07-Ch5		[none]	[none]			NeuN	0
A08-Ch5		[none]	[none]			NeuN	0
A09-Ch5		[none]	[none]			NeuN	0
A10-Ch5		[none]	[none]			31.1	0
A11-Ch5		[none]	[none]			7.52	0
A12-Ch5		[none]	[none]			NeuN	0
A13-Ch5		[none]	[none]			NeuN	0
A14-Ch5		[none]	[none]			NeuN	0
A15-Ch5		[none]	[none]			NeuN	0
A16-Ch5		[none]	[none]			2.81	0
B01-Ch5		[none]	[none]			NeuN	0
B02-Ch5		[none]	[none]			NeuN	0
B03-Ch5		[none]	[none]			NeuN	0
B04-Ch5		[none]	[none]			NeuN	0
B05-Ch5		[none]	[none]			NeuN	0
B06-Ch5		[none]	[none]			NeuN	0
B07-Ch5		[none]	[none]			NeuN	0
B08-Ch5		[none]	[none]			NeuN	0
B09-Ch5		[none]	[none]			NeuN	0
B10-Ch5		[none]	[none]			NeuN	0

## Sheet: Melt Curve Data
Sample Group:	Default		Show channel:
Smoothing:	ON		Ch 1	No
Smoothing window:	9		Ch 2	No
Low limit	63.5		Ch 3	Yes
High limit	91.5		Ch 4	No
Max # of peaks:	1		Ch 5	Yes
Peak threshold:	10
Slope Correction:	Yes
Derivative:	Negative
Temp	Channel	A1	A2	A3	A4	A5	A6	A7	A8	A9	A10	A11	A12	A13	A14	A15	A16	B1	B2	B3	B4	B5	B6	B7	B8	B9
60	3	43.97	33.69	36.07	20.53	28.97	27.82	28.75	40.23	47.21	22.96	34.63	28.01	33.53	26.65	22.87	41.07	33.42	34.21	12.48	28.43	36.8	30.42	22.75	31.61	15.56
60	5	1301.4	1152.87	1137.06	1220.84	1366.04	1126.78	553.8	1161.51	764.31	648.39	874.67	1125.85	979.82	1239.69	1135.52	606.3	1136.87	1289.81	948.25	1158.43	1038.31	1224.22	1199.78	1362.54	1250.6
60.2	3	45.17	36.05	35.23	22.15	29.1	29.37	30.33	38.71	47.22	24.02	35.78	29.83	34.1	30.25	24.16	41.79	34.59	34.79	14.11	28.23	36.82	32.14	22.92	32.29	16.37
60.2	5	1289.57	1147.53	1131.21	1212.3	1357.74	1119.86	549.24	1154.05	757.08	642.98	865.83	1121.35	970.3	1231.12	1128.85	600.55	1130.91	1281.31	945.76	1152.28	1029.78	1219.33	1192.75	1355.21	1244.09
60.4	3	46.04	37.69	34.65	23.4	29.14	30.61	31.38	37.53	47.16	24.71	36.54	31.1	34.15	32.98	25.07	41.95	35.41	35.24	15.23	27.87	36.55	33.3	23.06	32.79	16.96
60.4	5	1279.74	1143.24	1126.48	1205.52	1350.8	1114.5	545.1	1147.88	750.72	638.38	858.29	1117.68	961.88	1224.36	1123.7	595.42	1125.96	1274.25	944.16	1147.33	1022.19	1215.14	1187.42	1349.17	1238.9
60.6	3	46.6	38.63	34.34	24.27	29.06	31.54	31.88	36.67	47.02	25.04	36.89	31.83	33.7	34.84	25.6	41.55	35.9	35.54	15.84	27.36	35.99	33.89	23.17	33.11	17.33
60.6	5	1271.91	1140	1122.88	1200.5	1345.23	1110.71	541.37	1143	745.23	634.57	852.07	1114.85	954.56	1219.41	1120.07	590.89	1122.01	1268.63	943.46	1143.59	1015.53	1211.66	1183.8	1344.42	1235.01
60.8	3	46.84	38.86	34.3	24.76	28.88	32.15	31.84	36.16	46.82	24.99	36.84	32	32.73	35.83	25.75	40.6	36.05	35.72	15.93	26.7	35.13	33.91	23.23	33.24	17.49
60.8	5	1266.08	1137.8	1120.41	1197.23	1341.03	1108.49	538.05	1139.41	740.61	631.57	847.16	1112.85	948.33	1216.29	1117.95	586.98	1119.07	1264.45	943.66	1141.05	1009.81	1208.89	1181.88	1340.95	1232.44
61	3	49.95	39.85	36.39	26.3	29.47	33.22	31.7	37.78	47.09	25.24	37.89	32.12	32.42	37.03	27.73	38.68	36.14	36.51	16.19	26.54	34.36	33.61	24.7	33.55	18.13
61	5	1261.67	1136.6	1118.74	1195.74	1337.11	1107.27	534.37	1136.74	736.56	628.82	843.63	1111.12	942.6	1215.07	1117.14	583.55	1116.38	1261.04	944.6	1138.58	1004.87	1204.85	1181.06	1337.9	1230.47
61.2	3	45.44	34.6	33.55	23.84	26.13	31.54	28.37	34.27	44.82	22.43	34.23	28.47	27.21	33.85	23.06	34.91	35.33	34.48	12.55	23.46	31	29.66	21.85	30.79	16.08
61.2	5	1263.95	1139.92	1121.51	1199.81	1339.9	1111.05	533.18	1138.35	736.31	629.99	843.31	1113.19	941.92	1218.56	1121.68	582.66	1118.45	1265.08	949.21	1142.13	1003.52	1207.78	1186.87	1341.24	1233.73
61.4	3	44.34	34.48	33.54	22.62	25.67	31.76	27.86	35.31	44.88	21.39	34.02	27.66	26.11	33.07	20.6	33.62	34.43	34.3	11.99	23.22	29.67	28.94	21.41	30.93	16.67
61.4	5	1266.73	1142.03	1124.34	1203.39	1342.66	1116.65	532.98	1140.38	735.5	630.4	842.56	1116.25	939.94	1222	1124.96	580.94	1122.02	1268.16	954.36	1146.85	1003.59	1209.58	1191.83	1344.28	1238.05
61.6	3	45.28	35.7	36.55	24.98	28.35	33.73	28.78	38.89	47.49	22.26	34.43	29.52	26.72	34.92	23.94	35.5	37.17	36.84	14.32	26.32	30.55	30.61	23.66	33.75	19.02
61.6	5	1264.81	1142.37	1123.83	1204.41	1342.99	1118.8	531.44	1141.2	733.75	629.4	841.19	1118.1	938.38	1225.02	1128.4	579.64	1122.34	1266.26	957.1	1147.78	1000.4	1208.96	1193.04	1344.92	1239.35
61.8	3	50.13	37.91	39.63	28.97	32.46	36.91	30.78	44.37	50.82	24.75	36.97	33.53	29.8	37.93	30.16	38.97	42.5	40.79	19.44	31.9	34.31	34.82	28.14	38.43	23.38
61.8	5	1265.51	1147.24	1128.55	1208.29	1348.85	1123.53	531.42	1145.85	734.28	631.1	842.26	1123.42	938.54	1230.74	1134.76	581.18	1124.58	1268.25	963.45	1152.54	1000.2	1214.2	1197.83	1349.18	1246.43
62	3	55.21	41.79	44.17	32.77	36.26	40.65	33.89	49.91	53.76	26.53	39.84	39.36	32.41	43.02	34.78	43.97	46.2	45.62	26.78	38.76	39.48	38.79	33.07	42.73	26.57
62	5	1264.41	1149.18	1129.75	1209.73	1348.66	1125.97	529.56	1146.96	732.79	630.04	841.73	1124.99	936.19	1232.83	1138.55	581.05	1126.21	1267.35	967.22	1152.68	999.75	1215.6	1199.25	1349.84	1249.49
62.2	3	61.34	47.05	47.6	37.76	41.16	45.47	37.26	54.94	57.78	29.92	43.85	44.23	36.92	48.68	41.64	48.89	51.73	51.09	33.19	44.32	43.36	43.73	38.24	48.03	32.74
62.2	5	1262.57	1148.7	1130.73	1209.56	1347.89	1127.13	528.15	1146.31	729.71	628.4	839.28	1125.52	934.73	1232.97	1139.33	580.13	1125.62	1264.7	970.82	1152.9	997.24	1214.15	1200.41	1348.75	1250.87
62.4	3	65.99	53.1	52.34	42.78	45.58	49.8	38.64	57.85	61.74	32.47	46.73	47.7	40.78	52.39	47.57	52.88	57.31	55.49	37.95	49.02	46.26	46.66	42.41	52.81	36.94
62.4	5	1258.34	1146.45	1127.25	1205.86	1342.47	1124.59	524.75	1142.33	725.63	625.53	833.58	1123.41	931.78	1228.26	1138.27	579.39	1122.26	1258.62	970.86	1150.11	992.15	1209.35	1199.2	1344.75	1248.14
62.6	3	67.84	54.41	55.16	44.27	47.77	51	39.92	58.67	62.89	33.76	47.63	48.73	42.11	52.85	50.26	54.46	58.6	57.58	40.88	49.87	46.74	47.94	44.35	54.88	38.8
62.6	5	1252.02	1141.1	1122.88	1199.81	1335.62	1120.4	520.35	1137.16	719.78	621.94	827.69	1118.03	926.63	1222.01	1133.83	575.94	1115.91	1249.97	968.29	1144.65	985.02	1203.4	1196.49	1336.51	1244.94
62.8	3	63.46	51.78	53.48	41.89	46.27	49.14	37.9	54.71	60.06	31.45	45	45.24	40.25	49.33	46.36	52.13	57.78	55.64	39.63	47.23	44.3	44.74	41.59	52.92	37.92
62.8	5	1248.57	1138.04	1122.04	1198.86	1332.37	1119.96	516.59	1134.51	716.32	620.89	824.04	1115.79	924.06	1218.11	1133.41	574.02	1111.9	1247.15	968.23	1142.92	981.27	1201.15	1196.61	1333.42	1244.59
63	3	62.42	52.28	53.84	41.21	46.27	48.98	37.77	54.93	60.42	30.77	44.12	45.52	40.63	48.2	44.88	53.18	57.98	54.58	39.63	46.58	43.07	45.65	42.69	52.91	38.77
63	5	1243.9	1134.52	1119.36	1194.42	1326.08	1117.26	513.4	1130.83	711.83	618.14	818.45	1111.4	918.57	1212.54	1129.81	569.61	1108.71	1242.17	966.82	1139.04	976.65	1196.02	1193.98	1326.76	1243.06
63.2	3	61.76	51.58	54.94	42.68	46.74	49.45	38.19	54.79	59.85	29.44	44.01	46.58	40.69	47.08	45.18	54.23	58.72	54.42	38.22	46.84	42.3	45.97	42.19	51.34	39.22
63.2	5	1237.91	1130.59	1114.23	1188.88	1319.32	1112.49	509.19	1127.55	707.98	615.08	812.29	1105.69	914.07	1207.24	1127.2	565.2	1104.43	1236.04	965.02	1133.73	970.54	1189.92	1189.3	1320.63	1240.23
63.4	3	61.35	49.71	53.21	42.78	46.6	47.84	37.77	54.98	59.18	28.4	42.47	45.88	39.44	46.4	44.97	52.32	57.65	53.49	37.37	46.39	42.61	47.02	41.99	50.66	40.66
63.4	5	1232.76	1127.35	1109.58	1184.81	1314.53	1109.07	505.26	1123.97	704.5	613.13	807.99	1101.29	908.77	1201.16	1123.45	561.29	1100.42	1231.1	965.28	1128.83	964.49	1186.04	1185.44	1316.19	1238.77
63.6	3	61.05	49.2	51.16	42.71	46.66	47.5	37.32	55.68	58.9	27.52	42	45.87	39.08	45.77	45.32	52.67	55.46	53.31	36.67	44.95	42.74	47.04	42.6	49.36	40.37
63.6	5	1228.35	1123.5	1104.18	1181.05	1307.72	1105.48	501.56	1118.14	700.24	610.31	802.44	1095.67	901.73	1194.37	1118.14	556.86	1097.55	1226.53	965.26	1122.08	959.09	1178.94	1180.47	1310.44	1235.68
63.8	3	60	48.82	49.59	42.77	46.39	47.25	36.48	55.34	58.8	28.04	41.01	45.37	38.58	44.83	44.46	51.28	53.88	51.36	35.69	43.14	41.5	46.84	42.53	47.39	40.18
63.8	5	1222.53	1118.73	1098.62	1176.25	1300.13	1100.26	497.78	1112.98	696.47	606.86	797.07	1089.6	896.08	1187.88	1113.16	552.65	1093.14	1219.26	965.07	1116.97	952.24	1171.73	1174.31	1303.55	1230.95
64	3	59.89	49.7	49.96	42.55	46.48	47.18	36.31	55.78	60.39	28.29	41.63	45.06	37.38	46.17	45.53	52.3	53.8	51.11	35.59	42.85	40.7	45.16	41.37	47.12	40.18
64	5	1216.04	1113.39	1090.94	1170.87	1293.61	1094.65	494.84	1105.43	692.71	603.94	791.5	1084.41	891.57	1180.52	1109.17	550	1087.81	1211.84	963.94	1111.82	946.69	1165.26	1168.91	1295.68	1226.13
64.2	3	57.57	47.96	48.39	41.59	44.74	45.65	35.4	54.56	59.78	27.72	41.02	43.17	35.78	45.03	44.2	50.81	51.87	49.77	35.68	41.36	38.5	41.99	40	44.81	39.53
64.2	5	1212.52	1110.24	1087.94	1169	1291.55	1092	493.34	1102.16	692.03	602.97	788.49	1081.54	889.46	1179.01	1107.11	548.5	1086.29	1208.48	964.49	1110.84	944.02	1162.69	1167.18	1292.69	1225.3

## Sheet: Melting curve Results
Sample Group:	Default		Show channel:
Smoothing:	ON		Ch 1	No
Smoothing window:	9		Ch 2	No
Low limit	63.5		Ch 3	Yes
High limit	91.5		Ch 4	No
Max # of peaks:	1		Ch 5	Yes
Peak threshold:	10
Slope Correction:	Yes
Derivative:	Negative
Well	Replicate	Fluorophore	Sample Type	Sample Name	Target	Melt Temp 1	Peak Height 1	FW/HM Peak 1	Area Peak 1	Melt Temp 2	Peak Height 2	FW/HM Peak 2	Area Peak 2	Melt Temp 3	Peak Height 3	FW/HM Peak 3	Area Peak 3	Melt Temp 4	Peak Height 4	FW/HM Peak 4	Area Peak 4	Description
A01-Ch3		[none]	[none]			68.84	45.5430714843307	0.273418950605392	13.2646710299143	0	0	0	0	0	0	0	0	0	0	0	0
A01-Ch5		[none]	[none]			83.39	739.565469254148	1.28468931372366	1011.28545230602	0	0	0	0	0	0	0	0	0	0	0	0
A02-Ch3		[none]	[none]			64.98	41.6915951062741	0.526709577266872	23.3732309009118	0	0	0	0	0	0	0	0	0	0	0	0
A02-Ch5		[none]	[none]			83.2	635.498420861771	1.3408592766318	906.977888552071	0	0	0	0	0	0	0	0	0	0	0	0
A03-Ch3		[none]	[none]			68.84	38.7020123065616	0.302112848961353	12.4474821697889	0	0	0	0	0	0	0	0	0	0	0	0
A03-Ch5		[none]	[none]			83.16	644.684574264342	1.26094061771887	865.248661205446	0	0	0	0	0	0	0	0	0	0	0	0
A04-Ch3		[none]	[none]			64.8699999999999	28.0521778786528	0.652666076178476	19.4875232631767	0	0	0	0	0	0	0	0	0	0	0	0
A04-Ch5		[none]	[none]			83.26	615.552660232674	1.39034795814981	910.935733673722	0	0	0	0	0	0	0	0	0	0	0	0
A05-Ch3		[none]	[none]			64.8399999999999	38.1709538978841	0.584308500091732	23.7396460802077	0	0	0	0	0	0	0	0	0	0	0	0
A05-Ch5		[none]	[none]			83.26	717.461507077035	1.35077974915034	1031.53072721084	0	0	0	0	0	0	0	0	0	0	0	0
A06-Ch3		[none]	[none]			76.27	225.257558635074	0.548415254344046	131.48854567845	0	0	0	0	0	0	0	0	0	0	0	0
A06-Ch5		[none]	[none]			83.2	582.283898997902	1.34888314590412	836.003570674282	0	0	0	0	0	0	0	0	0	0	0	0
A07-Ch3		[none]	[none]			75.86	338.711678045325	0.575569266141951	207.504150965323	0	0	0	0	0	0	0	0	0	0	0	0
A07-Ch5		[none]	[none]			83.03	170.301037589428	1.90815784254216	345.88411195421	0	0	0	0	0	0	0	0	0	0	0	0
A08-Ch3		[none]	[none]			73.16	189.239629005603	0.665252281959727	133.99774308396	0	0	0	0	0	0	0	0	0	0	0	0
A08-Ch5		[none]	[none]			83.16	626.003515029326	1.22865029990156	818.660969603485	0	0	0	0	0	0	0	0	0	0	0	0
A09-Ch3		[none]	[none]			69.84	107.361160084548	0.780285122167692	89.1660533749198	0	0	0	0	0	0	0	0	0	0	0	0
A09-Ch5		[none]	[none]			83.4799999999999	289.622556911856	1.73461432851024	534.729735918779	0	0	0	0	0	0	0	0	0	0	0	0
A10-Ch3		[none]	[none]			64.93	27.8389110550027	0.501940512339771	14.8731691007252	0	0	0	0	0	0	0	0	0	0	0	0
A10-Ch5		[none]	[none]			85.81	355.905727728473	1.21554589389092	460.474262152221	0	0	0	0	0	0	0	0	0	0	0	0
A11-Ch3		[none]	[none]			77.57	480.148939325407	0.511384451700747	261.350006981821	0	0	0	0	0	0	0	0	0	0	0	0
A11-Ch5		[none]	[none]			80.25	441.882572190337	1.64891800885093	775.541348221543	0	0	0	0	0	0	0	0	0	0	0	0
A12-Ch3		[none]	[none]			64.97	36.3845032080163	0.540925798045099	20.9485113615238	0	0	0	0	0	0	0	0	0	0	0	0
A12-Ch5		[none]	[none]			84.58	399.637432119757	2.11560191644945	899.91011685144	0	0	0	0	0	0	0	0	0	0	0	0
A13-Ch3		[none]	[none]			64.96	33.4164398435743	0.444562563210726	15.8121925916423	0	0	0	0	0	0	0	0	0	0	0	0
