# Supplementary material for: Genome-wide identification of gene families related to miRNA biogenesis in Mangifera indica L. and their possible role during heat stress
Source: PeerJ. 2024 Jul 17;12:e17737. doi: 10.7717/peerj.17737 (PMC11260077; doi:10.7717/peerj.17737)
Supplement: Supplemental Information 20 [file peerj-12-17737-s020.xlsx]

## Sheet: General Info
General Info
Ord File Name	C:\Users\Propietario\Documents\Andrés\Corrida final Controles HEN 13 jul 2018.ord
Software Version	2.2.250.602
Instrument Name	PR0961400539
Instrument Serial	PR0961400539
Instrument Version	PCR 2.3.2, RT 1.1.12.23
Used Data Step	1
Sample Group	Default
Protocol Log	StartTime: 14/07/2018 10:20:39 a.m.
	RunTime: 01:21:10
	Path: /SHARED/PCPTP
	No errors

## Sheet: Plate
Well	Fluorophore	Sample Type	Target	Description	Quantity	AD Std Value	Replicate	Sample Name		Sample Group	Default
A01-Ch1	[none]	[none]			0						A1
A01-Ch2	[none]	[none]			0						A2
A01-Ch3	ROX	Unknown	HEN		0						A3
A01-Ch4	[none]	[none]			0						A4
A01-Ch5	SYBR	Unknown	HEN		0						A5
A02-Ch1	[none]	[none]			0						A6
A02-Ch2	[none]	[none]			0						A7
A02-Ch3	ROX	Unknown	HEN		0						A8
A02-Ch4	[none]	[none]			0						A9
A02-Ch5	SYBR	Unknown	HEN		0						A10
A03-Ch1	[none]	[none]			0						A11
A03-Ch2	[none]	[none]			0						A12
A03-Ch3	ROX	Unknown	HEN		0						A13
A03-Ch4	[none]	[none]			0						A14
A03-Ch5	SYBR	Unknown	HEN		0						A15
A04-Ch1	[none]	[none]			0						A16
A04-Ch2	[none]	[none]			0						B1
A04-Ch3	ROX	Unknown	HEN		0						B2
A04-Ch4	[none]	[none]			0						B3
A04-Ch5	SYBR	Unknown	HEN		0						B4
A05-Ch1	[none]	[none]			0						B5
A05-Ch2	[none]	[none]			0						B6
A05-Ch3	ROX	Unknown	HEN		0						B7
A05-Ch4	[none]	[none]			0						B8
A05-Ch5	SYBR	Unknown	HEN		0						B9
A06-Ch1	[none]	[none]			0						B10
A06-Ch2	[none]	[none]			0						B11
A06-Ch3	ROX	Unknown	HEN		0						B12
A06-Ch4	[none]	[none]			0						B13
A06-Ch5	SYBR	Unknown	HEN		0						B14
A07-Ch1	[none]	[none]			0						B15
A07-Ch2	[none]	[none]			0						B16
A07-Ch3	ROX	Unknown	HEN		0						C1
A07-Ch4	[none]	[none]			0						C2
A07-Ch5	SYBR	Unknown	HEN		0						C3
A08-Ch1	[none]	[none]			0						C4
A08-Ch2	[none]	[none]			0						C5
A08-Ch3	ROX	Unknown	HEN		0						C6
A08-Ch4	[none]	[none]			0						C7
A08-Ch5	SYBR	Unknown	HEN		0						C8
A09-Ch1	[none]	[none]			0						C9
A09-Ch2	[none]	[none]			0						C10
A09-Ch3	ROX	Unknown	HEN		0						C11
A09-Ch4	[none]	[none]			0						C12
A09-Ch5	SYBR	Unknown	HEN		0						C13
A10-Ch1	[none]	[none]			0						C14
A10-Ch2	[none]	[none]			0						C15
A10-Ch3	ROX	Unknown	HEN		0						C16
A10-Ch4	[none]	[none]			0						D1
A10-Ch5	SYBR	Unknown	HEN		0						D2
A11-Ch1	[none]	[none]			0						D3
A11-Ch2	[none]	[none]			0						D4
A11-Ch3	ROX	Unknown	HEN		0						D5
A11-Ch4	[none]	[none]			0						D6

## Sheet: Protocol
Reaction volume	10		Channel in use:
Consumable	1		Ch 1	No
Ramp rate	7		Ch 2	No
Heated lid ON	True		Ch 3	Yes (ROX)
Heated lid temperature	105		Ch 4	No
			Ch 5	Yes (SYBR)
	No	Cycle	Type	Information
	1		Temperature	Temp.: 95°C; Time:07:00
	2		Cycle	Number of cycles to loop:40; Number of steps inside loop:2
	3	*	. Temperature	Temp.: 95°C; Time:00:05
DA	4	*	. Temperature	Temp.: 60°C; Time:00:30; Data acquisition:True
	5		Temperature	Temp.: 60°C; Time:00:30
	6		Melting Curve	Start temperature:60°C; End temperature:95°C; Hold time:00:01; Temperature increment after hold:0.2°C
	7		Temperature	Temp.: 20°C; Time:00:10

## Sheet: Acquired Data 1
Data step:	4			Show channel:	Thresholds:
Sample Group:	Default		Ch 1	No
Method:	Threshold		Ch 2	No
Smoothing:	ON		Ch 3	Yes	101.82
Smoothing window:	5		Ch 4	No
Baseline:	Trend		Ch 5	Yes	132.14
Baseline range start:	3
Baseline range end:	7
Channel	Cycle	Temp	A1	A2	A3	A4	A5	A6	A7	A8	A9	A10	A11	A12	A13	A14	A15	A16	B1	B2	B3	B4	B5	B6	B7	B8
3	1	60	9.94	13.23	16.94	18.25	11.41	14.25	19.42	12.12	5.45	0	0.52	16.54	15.98	3.49	49.12	19.98	10.6	26.01	18.63	27.83	26.19	16.32	28.99	3.09
5	1	60	5.06	2.37	4.2	4.61	3.8	2.71	5.03	4.46	4.41	3.95	2.54	4.84	1.64	1.07	5.48	10.76	4.84	5.92	6.1	6.21	4.56	5	3.58	4.54
3	2	60	20.19	11.73	21.43	20.34	15.7	19.04	27.32	18.6	10.72	8.18	7.85	19.08	18.89	12.16	55.03	22.32	14.94	25.52	20.63	30.65	30.53	21.72	30.68	5.47
5	2	60	2.03	0.92	0.41	1.99	1.76	1.47	2.52	1.53	1.28	0.64	0.24	3.04	1.18	0.35	1.96	9.27	2.02	1.63	2	2.65	2.25	2.17	1.43	1.41
3	3	60	24.06	11.33	23.15	20.78	17.28	20.31	30.62	21.28	12.79	11.6	11.76	19.49	19.76	15.54	57.82	22.65	17.07	24.19	20.09	30.36	30.89	22.92	30.38	5.4
5	3	60	-1.15	-0.86	-2.34	-0.59	-0.81	-0.68	-0.34	-1.24	-1.7	-2.22	-2.01	0.16	-0.08	-0.91	-1.02	6.33	-0.8	-1.97	-1.54	-0.84	-0.71	-0.94	-0.98	-1.33
3	4	60	19.45	11.5	21.07	20.07	15.78	17.77	28.89	20.2	11.29	9.26	10.33	17.73	17.93	11.19	56.88	21.14	15.99	23.01	15.29	26.31	25.98	17.79	26.69	2.61
5	4	60	-6.13	-4.95	-5.13	-5	-5.72	-5.79	-5.91	-5.36	-6.57	-6.31	-6.11	-6.03	-3.84	-4.54	-4.85	0	-5	-6.57	-5.85	-6.41	-6.29	-6.68	-5.92	-5.59
3	5	60	14.26	11.67	17.97	14.85	11.05	12.73	22.29	14.64	6.29	5.41	8.3	11.91	14.6	8.03	55.08	17.07	13.24	17.55	13.47	20.67	20.09	14.03	22.86	-2.38
5	5	60	-3.52	-1.21	-0.96	-1.74	-2.33	-3.05	-2.42	-2.18	-2.17	-2.16	-2.09	-3.86	-0.98	-1.49	-2.03	2.02	-2.2	-2.95	-3.26	-2.45	-2.75	-3.32	-2.07	-1.53
3	6	60	10.3	8.53	16.37	11.3	9.77	10.7	19.41	12.71	6.51	5.54	8.61	10.46	12.64	8.38	51.14	12.71	8.98	16.93	13.04	19.27	19.91	14.51	23.39	-4.45
5	6	60	-0.34	0.21	1.88	0.59	-0.16	0.04	-0.91	0.85	0.72	1.01	1.62	-1.11	0.48	2.02	1.2	5.17	-0.29	1.17	0.08	-0.24	-0.82	0.47	1.95	1.09
3	7	60	15.71	7.79	20.12	12.44	12.05	13.1	20.04	16.12	11.42	8.05	10.43	10.84	14.29	12.71	49.04	15.23	12.88	20.22	15.39	20.94	22.88	16.56	22.58	-2.11
5	7	60	3	2.14	2.71	2.68	2.49	2.42	1.51	3.07	3.6	2.91	2.89	2.03	2.54	4.3	2.7	8.93	1.01	3.01	2.93	2.12	2.79	3.29	3.5	3.22
3	8	60	18.65	10.85	21.47	16.3	15.01	16.07	21.82	19.57	13.39	9.66	13.12	15.19	15.97	14.82	49.15	19.39	18.1	22.91	15.34	23.52	25.11	15.9	24.69	2.09
5	8	60	1.27	0.16	-1.25	-0.26	-1.05	0.58	-1.12	-0.21	0.87	-0.57	-0.42	-0.42	0.17	0	0.37	6.67	-1.03	-0.06	0.21	-0.91	0.14	-0.03	0.46	0.24
3	9	60	21.67	12.29	22.46	17.57	14.99	19.44	21.76	20.24	12.41	9.57	14.26	14.89	16.66	14.93	54.5	19.5	19.27	19.94	13.37	19.61	23.64	14.16	23.75	1.05
5	9	60	2.61	2.82	0.86	0.21	1.11	2.84	1.32	0.86	1.71	1.23	1.24	0.72	1.12	0.58	0.75	8.13	0.75	1.03	0.98	0.86	1.55	0.67	1.32	1.12
3	10	60	17.94	9.97	17.94	16.02	12.31	17.08	19.74	16.92	10.66	10.52	13.9	12.84	12.5	12.42	51.54	16.63	18.65	17.26	12.39	18.75	20.04	13.24	22.37	0.42
5	10	60	0.86	2.29	1.42	-0.53	1.73	1.66	0.24	0.43	-0.24	1.6	1.91	-0.63	-0.23	0.35	-0.23	6.99	0.59	0.86	0.63	-0.48	-0.05	-0.6	0.35	-0.2
3	11	60	8.01	2.81	8.71	7.41	4.08	6.92	10.81	6.54	5.43	4.21	5.11	4.56	6.74	4.02	39.35	10.07	9.58	5.99	5.61	9.8	9.79	5.73	11.35	-11.48
5	11	60	-2.58	-0.17	-1.07	-2.17	-0.72	-1.78	-2.09	-2.24	-2.96	-0.19	-0.5	-2.43	-2.09	-0.95	-3.26	3.41	-1.5	-2.02	-2.15	-2.1	-2.72	-1.53	-2.25	-2.41
3	12	60	0	0	1.29	3.33	1.19	2.83	5.63	1.74	0	2.47	0	1.92	3.43	0	33.79	7.84	3.01	1.67	0.92	6.44	5.84	2.3	7.33	-13.61
5	12	60	-6.1	-4.57	-4.87	-4.57	-4.56	-4.83	-4.72	-5.76	-5	-3.62	-4.61	-4.57	-4.94	-5.08	-5.66	1.32	-3.51	-4.62	-4.97	-4.81	-4.57	-3.64	-4.52	-5.11
3	13	60	3.64	2.45	5.76	4.26	1.63	6.22	7.85	4.18	2.58	2.05	1.1	5.44	6.83	0.64	36.18	9.61	3.6	4.71	2.92	3.88	6.56	3.74	8.75	-11.64
5	13	60	-3.86	-3.75	-2.59	-3.39	-3.23	-3.79	-2.49	-3.63	-3.01	-2.84	-3.03	-2.74	-3	-2.95	-3.95	6.1	-2.85	-3.26	-3.73	-3.71	-3.55	-3.39	-3.84	-3.92
3	14	60	12.33	6.95	11.44	8.66	4.56	10.9	12.16	13.79	8.24	5.72	6.37	11.33	12.2	4.85	38.29	14.03	11.6	13.96	9.6	12.12	10.81	10.64	14.23	-1.88
5	14	60	0.83	-1.04	0.09	-0.7	0.44	-0.25	0.9	0.3	-0.36	0.05	0.18	0.48	0.05	0.1	-0.57	11.09	-0.45	-0.26	-0.48	-1.29	0.09	-1	-0.78	-0.5
3	15	60	16.23	7.3	13.54	10.16	8.74	12.17	14.87	17.75	12.57	9.39	8.95	13.45	15.71	6.19	39.18	14.5	11.74	15.63	11.34	15.08	13.69	11.35	15.03	-4.09
5	15	60	3	2.56	2.59	2.68	3.36	2.71	3.2	3.52	2.57	2.89	2.99	3.31	3.62	2.59	2.25	15.71	3.06	2.27	2.32	2.6	3.53	2.87	2.25	2.82
3	16	60	21.36	13.25	19.31	18.55	16.58	18.72	18.69	22.64	13.93	15.82	12.76	16.81	19.08	13.49	45.74	17.1	16.18	19.97	12.07	19.95	19.73	16.72	19.7	-1.25
5	16	60	1.81	2.18	2.3	3.07	2.96	3.54	3.5	2.98	2.86	3.11	2.25	3.51	3.48	2.77	2.24	14.61	3.51	3.43	3.01	4.28	3.99	3.79	2.78	3.55
3	17	60	23.98	16.02	20.42	19.61	19.22	20.04	21.51	19.41	15.93	15.96	14.93	18.12	18.21	13.84	46.71	16.7	17.52	22.47	14.41	19.7	20.94	17	21.79	0.22
5	17	60	0.49	1.53	2.27	1.62	1.4	2.41	1.96	1.97	2.84	1.23	2.94	1.68	1.97	2.81	1.59	13.11	1.65	2.71	1.58	3.71	2.14	2.27	0.71	2.53
3	18	60	25.59	17.22	18.48	16.92	15.63	18.35	22.86	18.72	17.81	14.67	14.3	17.7	20.21	16.18	46.24	17.37	18.28	18.55	13.9	18.72	18.34	16.49	19.88	1.99
5	18	60	2.57	0.79	2.29	1.98	1.64	2.91	2.53	2.23	3.15	1.39	2.41	2.75	0.77	2.36	0.96	12.92	2.12	2.47	1.78	3.26	2.7	2.4	2.72	2.36
3	19	60	21.26	13.23	14.27	10.96	13.02	15.24	21.96	15.65	16.46	12.68	13.8	14.28	15.68	13.47	40.36	12.63	14.69	14.34	12.33	15.63	15.77	12.15	16.06	-0.31
5	19	60	3.24	1.31	2.94	2.06	2.56	3.49	2.44	2.7	3.88	2.89	3.7	3.36	1.43	2.5	1.57	14.41	2.81	1	2.71	2.33	3.51	3.29	2.86	1.59
3	20	60	20.55	13.35	14.92	12.18	12.4	15.58	18.16	14.91	12.18	13.14	11.52	16.13	14.65	13.39	36.03	14.58	13.6	13.12	11.45	16.31	16.07	11.45	15.54	0.01
5	20	60	1.52	-0.3	-0.62	-0.37	0.51	1.09	0.29	-0.72	0.98	1.7	1.86	2.27	-0.15	0.78	0.37	12.1	0.35	-0.47	1.8	-0.06	0.24	0.85	0.7	-1.15
3	21	60	21.13	11.07	12.1	12.27	10.27	13.52	15.72	11.58	8.76	10.04	10.51	14.22	12.76	11.38	29.55	10.26	12.64	16.24	11.86	16.06	13.89	11.14	15.9	-0.66
5	21	60	-0.55	-1.07	-2.46	-1.56	-1.16	-0.75	-2.02	-0.93	-0.32	-0.49	1.95	0.06	-0.18	-0.86	0.16	10.51	-1.64	-1.2	-0.25	-1.04	-1.03	-1.24	-1.88	-1.83
3	22	60	19.78	10.27	11.66	14.05	6.21	11.15	11.74	10.27	8.86	9.02	8.8	12.41	12.84	11.22	28.34	11.79	13.1	13.96	9.41	13.98	12.53	11.51	15.72	-0.57

## Sheet: Cq Results
Data step:	4			Show channel:	Thresholds:
Sample Group:	Default		Ch 1	No
Method:	Threshold		Ch 2	No
Smoothing:	ON		Ch 3	Yes	101.82
Smoothing window:	5		Ch 4	No
Baseline:	Trend		Ch 5	Yes	132.14
Baseline range start:	3
Baseline range end:	7
Well	Replicate	Fluorophore	Sample Type	Sample Name	Target	Cq	Quantity	Omitted	Description
A01-Ch3		ROX	Unknown		HEN	NeuN	NeuN
A01-Ch5		SYBR	Unknown		HEN	29.98	NeuN
A02-Ch3		ROX	Unknown		HEN	NeuN	NeuN
A02-Ch5		SYBR	Unknown		HEN	30.19	NeuN
A03-Ch3		ROX	Unknown		HEN	NeuN	NeuN
A03-Ch5		SYBR	Unknown		HEN	30.31	NeuN
A04-Ch3		ROX	Unknown		HEN	NeuN	NeuN
A04-Ch5		SYBR	Unknown		HEN	30.46	NeuN
A05-Ch3		ROX	Unknown		HEN	NeuN	NeuN
A05-Ch5		SYBR	Unknown		HEN	31.39	NeuN
A06-Ch3		ROX	Unknown		HEN	NeuN	NeuN
A06-Ch5		SYBR	Unknown		HEN	31.3	NeuN
A07-Ch3		ROX	Unknown		HEN	NeuN	NeuN
A07-Ch5		SYBR	Unknown		HEN	31.42	NeuN
A08-Ch3		ROX	Unknown		HEN	NeuN	NeuN
A08-Ch5		SYBR	Unknown		HEN	31.47	NeuN
A09-Ch3		ROX	Unknown		HEN	NeuN	NeuN
A09-Ch5		SYBR	Unknown		HEN	31.31	NeuN
A10-Ch3		ROX	Unknown		HEN	NeuN	NeuN
A10-Ch5		SYBR	Unknown		HEN	33.43	NeuN
A11-Ch3		ROX	Unknown		HEN	NeuN	NeuN
A11-Ch5		SYBR	Unknown		HEN	35.04	NeuN
A12-Ch3		ROX	Unknown		HEN	NeuN	NeuN
A12-Ch5		SYBR	Unknown		HEN	32.69	NeuN
A13-Ch3		ROX	Unknown		HEN	NeuN	NeuN
A13-Ch5		SYBR	Unknown		HEN	30.05	NeuN

## Sheet: Melt Curve Data
Sample Group:	Default		Show channel:
Smoothing:	ON		Ch 1	No
Smoothing window:	9		Ch 2	No
Low limit	63.5		Ch 3	Yes
High limit	91.5		Ch 4	No
Max # of peaks:	1		Ch 5	Yes
Peak threshold:	10
Slope Correction:	Yes
Derivative:	Negative
Temp	Channel	A1	A2	A3	A4	A5	A6	A7	A8	A9	A10	A11	A12	A13	A14	A15	A16	B1	B2	B3	B4	B5	B6	B7	B8	B9
60	3	39.94	44.03	32.12	20.31	32.65	29.62	16.89	27.4	31.84	30.4	31.57	0	11.05	35.29	117.44	20.78	40.07	34.34	6.04	27.14	30.17	21.98	17.06	26.94	26.48
60	5	1132.07	1126.21	1061.3	1220.3	1052.6	912.07	1200.84	1163.95	1017.01	966.51	936.93	968.07	1107.94	982.38	984.31	90.57	1171.69	1272.31	852.82	1049.38	1118.02	988.52	1127.86	1269.24	934.31
60.2	3	40.73	42.48	29.51	20.17	31.78	29.14	18.22	26.21	30.18	30.78	29.72	0.27	12.18	34.21	118.76	18.97	41.1	34.72	5.92	26.8	29.16	20.61	17.45	26.29	26.29
60.2	5	1128.62	1122.01	1057.69	1217.66	1046.99	906.73	1198.03	1160.75	1017.27	965.03	932.15	967.6	1105.57	982.01	984.88	90.59	1169.3	1270.01	854.21	1046.46	1114.51	984.42	1126.05	1266.66	928.9
60.4	3	41.1	41.27	27.38	20.03	30.93	28.54	19.13	25.26	28.95	31.12	28.2	0.59	13.15	33.53	119.64	17.49	41.95	34.98	6.14	26.58	28.36	19.55	17.72	25.73	25.99
60.4	5	1124.58	1117.24	1053.37	1214.31	1040.99	901.14	1194.48	1157.05	1016.67	963.07	927.15	966.5	1103	980.78	984.37	90.33	1166.29	1266.88	854.92	1043.2	1110.7	980.2	1123.66	1263.26	923.21
60.6	3	41.06	40.39	25.75	19.89	30.1	27.82	19.64	24.54	28.14	31.42	27.02	0.93	13.95	33.23	120.07	16.34	42.62	35.13	6.7	26.51	27.75	18.79	17.85	25.26	25.56
60.6	5	1119.96	1111.91	1048.34	1210.26	1034.59	895.3	1190.19	1152.84	1015.21	960.63	921.94	964.74	1100.21	978.67	982.77	89.78	1162.65	1262.94	854.96	1039.58	1106.58	975.87	1120.68	1259.04	917.23
60.8	3	40.61	39.86	24.6	19.75	29.29	26.98	19.73	24.06	27.76	31.68	26.17	1.32	14.59	33.32	120.05	15.53	43.12	35.17	7.58	26.56	27.35	18.35	17.86	24.87	25.02
60.8	5	1114.74	1106	1042.58	1205.49	1027.8	889.21	1185.16	1148.13	1012.89	957.71	916.53	962.34	1097.21	975.69	980.1	88.95	1158.4	1258.19	854.33	1035.61	1102.14	971.44	1117.12	1254.01	910.97
61	3	39.05	38.85	24.09	19.94	28.73	25.91	19.83	23.24	27.41	30.8	25.4	1.17	14.77	33.39	117.69	15.49	42.55	34.7	9.08	26.31	26.22	18.3	18.13	24.01	23.33
61	5	1109.36	1098.71	1035.91	1199.42	1019.67	883.6	1177.79	1143.43	1009.31	953.91	910.26	958.65	1094.28	970.84	974.99	87.91	1152.88	1253.28	852.17	1031.29	1097.71	965.9	1112.5	1247.57	903.77
61.2	3	38.19	38.91	23.72	20.52	27.94	24.77	19.09	23.77	29.58	31.6	25.51	1.89	16.11	35.17	117.55	15.46	42.62	34.82	10.29	26.62	27.07	18.14	17.01	24.28	22.62
61.2	5	1100.13	1090.42	1026.2	1190.82	1009.91	874.69	1169.63	1133.62	1002.33	948.28	902.31	952.93	1087.81	963.17	967.85	85.52	1145.29	1244.62	849.06	1023.99	1089.93	958.95	1105.29	1238.02	894.57
61.4	3	37.78	40.16	24.33	20.02	27.98	24.98	17.9	24.72	31.72	32.58	25.49	5.02	17.85	36.12	120.2	14.88	43.03	35.75	11.23	27.78	28.49	18.84	16.89	26.25	23.91
61.4	5	1091.11	1080.45	1017.6	1180.41	1000.88	865.49	1161.32	1126.05	996.91	941.96	894.84	947.39	1082.88	956.89	961.71	83.56	1135.69	1234.96	844.95	1016.3	1082.31	954.09	1098.4	1229.01	885.83
61.6	3	38.89	42.02	25.42	20.46	27.18	24.82	18.3	26.45	32.51	33.91	25.75	5.48	18.06	37.58	121.25	15.32	44.18	35.69	12.01	29.32	31.18	19.52	17.06	26.59	23.67
61.6	5	1091.69	1079.79	1016.85	1181.67	999.21	862.6	1163.13	1127.5	998.7	943.43	893.28	951.44	1085.86	959.05	962.43	83.6	1135.5	1233.83	847.5	1017.46	1081.86	955.61	1100.45	1230.01	884.56
61.8	3	40.14	43.17	26.16	21.26	27.62	25.06	18.35	28.14	33.77	34.97	27.08	6.77	19.18	37.97	124.14	15.63	45.56	35.85	13.31	29.14	32.53	20.81	16.96	27.24	24.3
61.8	5	1096.21	1083.33	1021.39	1187.14	1000.17	864.01	1169.15	1132.84	1004.01	949.49	895.44	957.01	1093.07	964.97	968.18	85.48	1140.32	1236.7	855.66	1022.77	1083.86	959.87	1105.82	1234.01	886.56
62	3	40.12	43.28	26.28	21.94	28.97	25.59	19.02	28.68	35.39	35.36	27.67	6.91	20.46	37.94	125.59	15.25	45.34	37.17	13.38	30.49	32.42	21.08	17.82	28.15	24.21
62	5	1103.62	1091.46	1028.69	1194.9	1005.27	868.43	1179.74	1142.14	1013.3	957.07	898.86	965.39	1101.68	972.35	977.44	88.35	1148.73	1244.61	866.25	1032.06	1092.08	966.97	1115.75	1244.14	892.09
62.2	3	39.44	43.28	26.51	23.6	29.19	25.56	20.74	29.57	35.67	34.3	27.36	6.32	20.26	38.03	127.58	15.57	44.16	35.6	12.56	29.72	32.22	20.23	17.63	27.44	22.99
62.2	5	1113.14	1099.46	1037.61	1206.47	1010.86	873.33	1189.68	1150.46	1025.16	964.65	903.07	974.99	1113.14	980.9	986.57	91.41	1157.95	1254.8	876.96	1040.32	1099.53	975.56	1125.03	1253.91	899.09
62.4	3	40.8	42.66	26.21	25.35	28.64	25.77	23.14	28.56	35.58	34.69	28.47	7.52	20.85	38.53	129.33	18.4	42.75	34.66	12.47	28.44	31.83	20.66	18.51	27.15	21.88
62.4	5	1115.9	1100.83	1040.69	1209.86	1011.81	874.32	1192.71	1151.69	1029.46	966.89	902.99	980.36	1117.21	982.59	989.38	92.63	1161.51	1259.46	882.61	1042.57	1101.86	977.64	1129.08	1256.8	900.7
62.6	3	39.85	41.54	24.77	25.05	27.44	24.55	22.72	28.13	34.32	35.25	28.44	6.88	20.63	39	127.27	20.04	41.25	34.01	13.84	28.05	30.1	21.3	19.01	25.48	21.49
62.6	5	1112.47	1096.62	1037.19	1208.96	1008.01	870.6	1189.47	1147.34	1029.74	964.13	899.65	979.6	1115.84	980.42	986.63	92.76	1159.99	1257.75	883.67	1040.18	1099.71	975.4	1128.23	1253.33	897.58
62.8	3	39.59	40.13	23.98	25.48	24.71	23.78	21.52	27.23	35.75	35.31	27.69	6.64	21.22	38.77	126.49	20.3	40.03	34.87	14.91	28.11	30.24	21.56	19.54	24.71	21.65
62.8	5	1106.5	1090.22	1032.04	1205.14	1003.81	866.5	1184.76	1141.39	1027.27	959.85	894.01	977.48	1112.44	977.55	983.59	91.99	1154.87	1252.89	882.32	1034.46	1094.43	970.95	1125.03	1247.07	891.29
63	3	39.97	39.17	23.61	25.43	24.28	23.57	20.84	28.21	37.58	36.31	28.2	7.82	25.09	38.79	125.8	19.46	40.89	37.1	16.62	29.1	30.8	23.4	20.91	26.13	22.85
63	5	1095.42	1077.85	1023.13	1193.43	993.13	856.16	1172.74	1132.11	1019.48	950.65	883.16	970.88	1104.73	970.6	974.27	89.42	1144.14	1240.42	876.53	1024.18	1084.21	963.1	1116.97	1235.4	880.52
63.2	3	40.92	38.97	24.32	26.5	25.39	23.77	21.93	28.7	38.85	37.78	27.89	9.11	27.36	40.28	124.96	17.75	42.58	38.24	18.1	30.36	31.57	25.84	21.48	26.56	23.87
63.2	5	1086.62	1068.14	1016.7	1185.86	984.26	848.99	1163.58	1124.7	1013.18	943.23	873.66	966.37	1098.13	965.83	966.31	87.39	1136.72	1229.88	871.47	1016.41	1074.72	954.47	1110.01	1226.24	872.27
63.4	3	40.23	37.81	24.73	26.61	25.55	23.69	21.83	28.12	39.55	38.14	27.48	10.04	26.73	38.97	123.39	14.38	43.64	38.64	18.73	30.71	30.42	25.31	20.71	27.96	23.44
63.4	5	1073.94	1055.97	1005.68	1172.41	970.53	838.29	1150	1112.61	1003.47	933.5	861.48	957.6	1088.66	954.33	956.83	84.97	1122.78	1214.73	864.26	1005.09	1061.1	942.36	1097.48	1211.71	860.47
63.6	3	38.46	38.12	24.04	26.6	26.36	23.34	21.21	27.37	40.66	37.79	27.62	10.7	26.11	38.5	123.2	12.35	43.63	38.82	18.13	30.69	28.88	24.71	20.25	28.87	21.94
63.6	5	1057.96	1040.92	990.97	1154.27	955.72	825.39	1134.93	1097.26	990.67	919.8	845.52	945.89	1074.72	939.25	943.38	81.92	1105.71	1197.02	854.41	990.98	1044.39	927.09	1081.84	1195.66	846.91
63.8	3	37.23	39.05	24.12	26.45	26.5	23.6	22.19	26.44	40.27	36.19	27.46	10.39	24.39	36.6	124.43	12.92	44.4	36.91	16.82	30.25	27.73	22.25	19.28	29.18	20.49
63.8	5	1044.93	1025.87	977.87	1140.57	941.48	812.91	1119.6	1081.89	979.42	907.97	831.36	934.77	1061.71	924.47	929.98	79.03	1091.14	1181.18	845.66	978.5	1028.66	914.7	1067.03	1180.11	836.05
64	3	36.35	37.02	23.21	26.05	26	22.27	22.2	25.92	40.13	35.17	26.32	9.89	23.1	36.86	125.25	13.9	42.97	35.31	16.76	29.74	26.29	20.56	18.94	27.92	19.27
64	5	1035.57	1016	969.64	1130.13	932.97	804.88	1110.14	1071.37	971.48	899.61	821.78	928.78	1054.63	914.21	921.94	77.41	1081	1170.82	841.58	969.11	1017.97	906.09	1057.64	1169.59	827.94
64.2	3	36.71	36.96	22.87	24.8	25.57	22.22	22	25.29	40.59	34.67	25.5	10.13	22.33	36.66	126.76	15.18	42.89	34.67	16.59	29.94	25.71	20.45	20.18	27.85	19.14
64.2	5	1026.4	1006.39	959.97	1120.37	923.74	796.42	1101.53	1061.04	964.78	890.24	812.34	922.5	1045.71	904.15	912.7	75.97	1070.02	1159.76	835.99	958.95	1007.25	897.55	1048.35	1158.84	819.89

## Sheet: Melting curve Results
Sample Group:	Default		Show channel:
Smoothing:	ON		Ch 1	No
Smoothing window:	9		Ch 2	No
Low limit	63.5		Ch 3	Yes
High limit	91.5		Ch 4	No
Max # of peaks:	1		Ch 5	Yes
Peak threshold:	10
Slope Correction:	Yes
Derivative:	Negative
Well	Replicate	Fluorophore	Sample Type	Sample Name	Target	Melt Temp 1	Peak Height 1	FW/HM Peak 1	Area Peak 1	Melt Temp 2	Peak Height 2	FW/HM Peak 2	Area Peak 2	Melt Temp 3	Peak Height 3	FW/HM Peak 3	Area Peak 3	Melt Temp 4	Peak Height 4	FW/HM Peak 4	Area Peak 4	Description
A01-Ch3		ROX	Unknown		HEN	82.67	33.8185191998528	0.310136045515537	11.1611220425688	0	0	0	0	0	0	0	0	0	0	0	0
A01-Ch5		SYBR	Unknown		HEN	82.2499999999999	537.29303695623	1.64691261713323	941.847939089887	0	0	0	0	0	0	0	0	0	0	0	0
A02-Ch3		ROX	Unknown		HEN	82.7500000000001	32.9614425174092	0.59157351488024	20.7545802600699	0	0	0	0	0	0	0	0	0	0	0	0
A02-Ch5		SYBR	Unknown		HEN	82.2	527.656775825198	1.68427678033447	945.940899944506	0	0	0	0	0	0	0	0	0	0	0	0
A03-Ch3		ROX	Unknown		HEN	82.82	20.7731423535813	0.275379623937607	6.10038114506106	0	0	0	0	0	0	0	0	0	0	0	0
A03-Ch5		SYBR	Unknown		HEN	82.15	486.639837812928	1.69741082976458	879.212087430818	0	0	0	0	0	0	0	0	0	0	0	0
A04-Ch3		ROX	Unknown		HEN	89.01	25.4564756392143	0.355202020990849	9.62462305956259	0	0	0	0	0	0	0	0	0	0	0	0
A04-Ch5		SYBR	Unknown		HEN	82.13	585.660785828888	1.64302558777914	1024.21114095468	0	0	0	0	0	0	0	0	0	0	0	0
A05-Ch3		ROX	Unknown		HEN	82.82	28.4429553217819	0.429634815090895	13.0068837989444	0	0	0	0	0	0	0	0	0	0	0	0
A05-Ch5		SYBR	Unknown		HEN	82.11	491.901395301724	1.68076835212915	880.004593555841	0	0	0	0	0	0	0	0	0	0	0	0
A06-Ch3		ROX	Unknown		HEN	88.06	24.1883060385711	0.250064097118378	6.42281959809699	0	0	0	0	0	0	0	0	0	0	0	0
A06-Ch5		SYBR	Unknown		HEN	82.0899999999999	426.829717873221	1.66990461449081	758.656768706108	0	0	0	0	0	0	0	0	0	0	0	0
A07-Ch3		ROX	Unknown		HEN	77.6	21.9448324626105	0.0294375449180603	4.38896649252201	0	0	0	0	0	0	0	0	0	0	0	0
A07-Ch5		SYBR	Unknown		HEN	82.11	571.183986278587	1.63003083364055	990.993635616052	0	0	0	0	0	0	0	0	0	0	0	0
A08-Ch3		ROX	Unknown		HEN	90.69	47.6564843995033	0.291183055257797	14.7553603336446	0	0	0	0	0	0	0	0	0	0	0	0
A08-Ch5		SYBR	Unknown		HEN	82.15	557.110790585561	1.63556120207445	969.856303786192	0	0	0	0	0	0	0	0	0	0	0	0
A09-Ch3		ROX	Unknown		HEN	70.1200000000001	52.790948588312	0.866273359157704	48.6758391272447	0	0	0	0	0	0	0	0	0	0	0	0
A09-Ch5		SYBR	Unknown		HEN	82.16	479.170134245016	1.64105617108508	836.974469563536	0	0	0	0	0	0	0	0	0	0	0	0
A10-Ch3		ROX	Unknown		HEN	72.4900000000001	83.1869379199456	0.775623014926538	68.6759773040362	0	0	0	0	0	0	0	0	0	0	0	0
A10-Ch5		SYBR	Unknown		HEN	82.16	472.366393942174	1.56705525966058	787.884082738948	0	0	0	0	0	0	0	0	0	0	0	0
A11-Ch3		ROX	Unknown		HEN	75.33	169.592865707025	0.637467412147298	115.07065618979	0	0	0	0	0	0	0	0	0	0	0	0
A11-Ch5		SYBR	Unknown		HEN	82.33	453.925707098005	1.557965666288	752.734261995171	0	0	0	0	0	0	0	0	0	0	0	0
A12-Ch3		ROX	Unknown		HEN	0	0	0	0	0	0	0	0	0	0	0	0	0	0	0	0
A12-Ch5		SYBR	Unknown		HEN	82.2699999999999	448.719827542725	1.61621181976036	771.920476264037	0	0	0	0	0	0	0	0	0	0	0	0
A13-Ch3		ROX	Unknown		HEN	82.83	12.496642889712	0.255909531354904	3.41570573420492	0	0	0	0	0	0	0	0	0	0	0	0
