# Supplementary material for: Genome-wide identification of gene families related to miRNA biogenesis in Mangifera indica L. and their possible role during heat stress
Source: PeerJ. 2024 Jul 17;12:e17737. doi: 10.7717/peerj.17737 (PMC11260077; doi:10.7717/peerj.17737)
Supplement: Supplemental Information 21 [file peerj-12-17737-s021.xlsx]

## Sheet: General Info
General Info
Ord File Name	C:\Users\Propietario\Documents\Andrés\Corrida final tratados HEN 14 julio 2018.ord
Software Version	2.2.250.602
Instrument Name	PR0961400539
Instrument Serial	PR0961400539
Instrument Version	PCR 2.3.2, RT 1.1.12.23
Used Data Step	1
Sample Group	Default
Protocol Log	StartTime: 14/07/2018 01:14:48 p.m.
	RunTime: 01:21:03
	Path: /SHARED/PCPTP
	No errors

## Sheet: Plate
Well	Fluorophore	Sample Type	Target	Description	Quantity	AD Std Value	Replicate	Sample Name		Sample Group	Default
A01-Ch1	[none]	[none]			0						A1
A01-Ch2	[none]	[none]			0						A2
A01-Ch3	[none]	[none]			0						A3
A01-Ch4	[none]	[none]			0						A4
A01-Ch5	[none]	[none]			0						A5
A02-Ch1	[none]	[none]			0						A6
A02-Ch2	[none]	[none]			0						A7
A02-Ch3	[none]	[none]			0						A8
A02-Ch4	[none]	[none]			0						A9
A02-Ch5	[none]	[none]			0						A10
A03-Ch1	[none]	[none]			0						A11
A03-Ch2	[none]	[none]			0						A12
A03-Ch3	[none]	[none]			0						A13
A03-Ch4	[none]	[none]			0						A14
A03-Ch5	[none]	[none]			0						A15
A04-Ch1	[none]	[none]			0						A16
A04-Ch2	[none]	[none]			0						B1
A04-Ch3	[none]	[none]			0						B2
A04-Ch4	[none]	[none]			0						B3
A04-Ch5	[none]	[none]			0						B4
A05-Ch1	[none]	[none]			0						B5
A05-Ch2	[none]	[none]			0						B6
A05-Ch3	[none]	[none]			0						B7
A05-Ch4	[none]	[none]			0						B8
A05-Ch5	[none]	[none]			0						B9
A06-Ch1	[none]	[none]			0						B10
A06-Ch2	[none]	[none]			0						B11
A06-Ch3	[none]	[none]			0						B12
A06-Ch4	[none]	[none]			0						B13
A06-Ch5	[none]	[none]			0						B14
A07-Ch1	[none]	[none]			0						B15
A07-Ch2	[none]	[none]			0						B16
A07-Ch3	[none]	[none]			0						C1
A07-Ch4	[none]	[none]			0						C2
A07-Ch5	[none]	[none]			0						C3
A08-Ch1	[none]	[none]			0						C4
A08-Ch2	[none]	[none]			0						C5
A08-Ch3	[none]	[none]			0						C6
A08-Ch4	[none]	[none]			0						C7
A08-Ch5	[none]	[none]			0						C8
A09-Ch1	[none]	[none]			0						C9
A09-Ch2	[none]	[none]			0						C10
A09-Ch3	[none]	[none]			0						C11
A09-Ch4	[none]	[none]			0						C12
A09-Ch5	[none]	[none]			0						C13
A10-Ch1	[none]	[none]			0						C14
A10-Ch2	[none]	[none]			0						C15
A10-Ch3	[none]	[none]			0						C16
A10-Ch4	[none]	[none]			0						D1
A10-Ch5	[none]	[none]			0						D2
A11-Ch1	[none]	[none]			0						D3
A11-Ch2	[none]	[none]			0						D4
A11-Ch3	[none]	[none]			0						D5
A11-Ch4	[none]	[none]			0						D6

## Sheet: Protocol
Reaction volume	10		Channel in use:
Consumable	1		Ch 1	No
Ramp rate	7		Ch 2	No
Heated lid ON	True		Ch 3	Yes (ROX)
Heated lid temperature	105		Ch 4	No
			Ch 5	Yes (SYBR)
	No	Cycle	Type	Information
	1		Temperature	Temp.: 95°C; Time:07:00
	2		Cycle	Number of cycles to loop:40; Number of steps inside loop:2
	3	*	. Temperature	Temp.: 95°C; Time:00:05
DA	4	*	. Temperature	Temp.: 60°C; Time:00:30; Data acquisition:True
	5		Temperature	Temp.: 60°C; Time:00:30
	6		Melting Curve	Start temperature:60°C; End temperature:95°C; Hold time:00:01; Temperature increment after hold:0.2°C
	7		Temperature	Temp.: 20°C; Time:00:10

## Sheet: Acquired Data 1
Data step:	4			Show channel:	Thresholds:
Sample Group:	Default		Ch 1	No
Method:	Threshold		Ch 2	No
Smoothing:	ON		Ch 3	No
Smoothing window:	5		Ch 4	No
Baseline:	Trend		Ch 5	Yes	206.46
Baseline range start:	3
Baseline range end:	7
Channel	Cycle	Temp	A1	A2	A3	A4	A5	A6	A7	A8	A9	A10	A11	A12	A13	A14	A15	A16	B1	B2	B3	B4	B5	B6	B7	B8
5	1	60	51.88	37.11	33.57	38.53	25.18	44.6	8.98	12.03	2.05	0	0	23.52	30.76	47.22	-91.25	0	26.38	41.59	42.84	18.75	23.74	0	61.2	48.84
5	2	60	74.42	60.89	54.68	60.14	61.43	69.01	43.12	47.94	38.19	43.04	50.69	41.75	46.17	63.93	-69.54	27.36	55.38	58.1	58.06	47.33	49.94	35.54	70.65	74.72
5	3	60	89.99	82.07	72.62	80.73	90.32	90.22	70.28	76.47	67.45	76.4	89.32	56.38	59.95	77	-48.83	50.84	74.24	73.53	72.14	69.9	71.68	63.83	81.67	95.46
5	4	60	99.01	104.01	91.16	106	114.57	113.32	92.77	101.7	92	103.14	116.96	67.97	74.48	86.9	-25.75	71.02	81.43	92.41	87.37	88.96	91.14	86.54	99.52	114.18
5	5	60	89.15	100.49	81.68	103.39	111.02	105.69	91.95	95.42	94.19	100.29	119.77	63.6	71.44	82.68	-23.54	79.88	71.09	84.78	85.76	84.5	89.02	85.69	92.43	105.98
5	6	60	69	83.95	65.1	85.39	90.09	84.27	74.08	76.46	77.99	83.76	104.56	50.97	57.03	65.58	-32.07	82.31	53.05	69.32	71.31	67.32	71.18	72.13	75.98	85.26
5	7	60	31.77	45.24	29.79	47.31	46.82	45.41	39.97	40.09	40.65	50.75	73.32	21.51	26.52	33.97	-48.74	78.83	19.98	34.61	38.54	32.43	34.54	39.11	41.58	45.47
5	8	60	12.1	25.65	14.03	27.7	23.12	29	19.54	19.47	19.36	32.41	52.26	8.7	8.97	14.12	-53.4	79.23	6.44	15.01	19.31	15.02	14.6	23.89	22.69	26.12
5	9	60	0	13.69	3.02	14.01	11.32	16.38	9.49	6.1	11.95	21.5	41.17	3.34	2.89	4.63	-55.86	78.23	0	0	13.12	5.77	6.05	15.29	9.36	13.78
5	10	60	0.43	13.9	4.46	6.22	10.01	13.54	8.73	4.47	8.98	20.93	40.2	2.26	0.98	0	-50.57	82.23	1.39	0.26	17.53	5.08	4.44	13.89	6.07	11.88
5	11	60	4.08	18.35	8.81	4.46	12.84	13.57	16.06	11.76	11.49	22.26	44.32	2.52	4.28	6.36	-38.2	89.94	7.46	5.44	19.33	10.66	5.1	14.45	10.46	10.47
5	12	60	13.49	22.97	13.54	10.76	17.24	17.98	20.31	14.24	16.82	23.21	49.19	4.66	6.38	9.53	-26.22	98.07	14.8	11.56	20.43	16.6	7.54	17.14	16.02	15.41
5	13	60	24.29	29.9	21.78	20.27	25.93	25.52	24.63	20.4	26.4	30.53	58.04	15.37	12.37	16.29	-11.04	106.07	24.75	19.81	25.36	22.04	15.76	24.34	22.13	26.37
5	14	60	29.96	33.37	28.14	22.26	32.09	30.43	27.76	21.8	29.26	33.88	64.07	20.95	16.2	19.97	0.27	113.94	27.44	26.04	30.93	24.08	23	28.09	24.78	30.48
5	15	60	23.11	29.24	23.77	18.83	26.06	25.13	22.39	19.81	22.65	30.58	56.08	17.9	14.39	19.53	2.06	115.91	25.64	22.94	25.7	22.66	16.68	25.94	20.82	23.6
5	16	60	18.23	24.14	17.26	14.1	21.5	19.99	17.34	14.46	15.33	25.88	49.32	11.16	11.92	15.37	-0.88	114.96	24.49	18.73	20.45	18.99	12.71	20.28	17.15	17.51
5	17	60	14.7	19.46	12.4	12.42	13.84	14.48	9.7	9.98	8.06	21.66	43.32	7.8	6.49	8.07	-3.71	114.32	23.86	14.01	13.76	12.63	8.47	15.54	11.75	14.39
5	18	60	11.78	15.09	9.63	10.61	10.07	11.81	9.3	6.98	4.89	18.49	44.74	6.05	5.46	7.33	0.48	118.75	23.98	12.05	10.99	9.32	7.65	13.76	11.27	10.9
5	19	60	3.87	4.73	3.07	6.53	1.42	2.92	2.29	2.79	0.22	13.69	38.49	2.36	0.58	3.75	1.78	119.02	17.72	5.72	5.08	2.81	0.39	10.05	5.43	5.45
5	20	60	0.39	0	0	1.68	0	0	0.16	0	0	11.04	35.11	0.01	0	3.85	0.98	117.11	16.51	2.96	1.06	0	0	5.97	1.1	0
5	21	60	0.49	2.38	1.31	0	1.19	0.3	0	0.11	1.93	10.95	36.07	0	1.42	5.29	4.43	120.51	18.13	1.84	0	0.86	0.33	4.6	0	0.34
5	22	60	4.61	8.23	1.18	4.84	3.8	4.87	4.61	3.82	5.43	14.61	37.84	0.55	2.75	8.93	11.82	127.49	24.76	7.51	2.8	4.73	0.79	7.62	1.8	4.34
5	23	60	10.19	13.54	4.19	13.02	10.79	9.63	10.3	9.64	11.64	22.15	41.16	4.18	8.68	13.78	20.79	131.14	33.14	18.9	10.07	9.62	7.37	14.41	7.6	12.48
5	24	60	13.99	15.97	9.45	20.6	18.76	16.76	19.35	14.38	18.35	27.41	43.27	11.01	16.01	19.29	24.13	132.26	44.37	30.63	14.31	14.15	16.44	18.22	13.34	17.7
5	25	60	13.68	12.75	10.91	20.11	23.41	16.16	22.14	18.6	19.7	26.96	44	11.96	19.88	20.47	26.47	133.88	47.78	30.79	12.38	15.34	17.65	17.46	15.56	19.53
5	26	60	8.45	7.98	5.1	17.97	19.91	10.76	18.86	17.3	16.04	23.34	38.44	4.58	14.63	14.44	24.21	131.58	44.53	26.35	9.23	10.8	11.3	13.99	9.48	16.26
5	27	60	8.16	9.93	1.23	17.43	16.59	11.77	19.52	16.93	17.06	28.05	38.15	3.28	17.62	13.25	25.49	131.92	43.43	27.2	10.73	11.54	9.68	15.85	10.52	16.2
5	28	60	13.32	18.85	5.81	21.5	20.06	20.33	27.58	22.47	21.61	33.31	43	9.42	21.37	17.12	27.63	135.93	49.94	35.27	12.87	18.3	17.14	19.33	18.58	20.82
5	29	60	18.6	24.17	12.46	27.23	27.22	27.61	31.45	30.57	27.61	38.88	48.23	18.01	27.54	24.9	33.13	139.93	53.23	40.2	16.22	25.33	23.33	26.41	25.46	28.69
5	30	60	36.76	47.57	39.67	51.05	56.18	53.15	48.3	54.16	48.52	57.93	67.68	37.34	47.4	48.19	52.13	150.9	71.26	65.09	33.62	48.62	45.9	48.43	46.5	55.01
5	31	60	53.62	66.79	61.69	69.15	77.77	73.86	65.73	66.66	62.75	77.15	83.66	52.18	65.47	63.55	65.73	159.74	88.85	87.33	49.81	69.51	61.67	65.22	63.35	72.91
5	32	60	62.38	78.22	70	77.14	85.82	81.48	74.77	69.86	66.15	83.22	94.81	59.64	69.2	67.55	70.35	162.72	99.35	100.9	56.45	79.22	68.94	72.26	73.08	80.18
5	33	60	51.24	70.56	56.43	65.7	70.29	69.29	65.43	58.12	54.99	72.34	88.79	52.55	60.55	57.57	63.17	158.93	90.41	85.63	46.91	65.63	56.26	65.89	62.85	69.71
5	34	60	42.68	66.31	51.39	60.64	64.45	64.84	59.7	58.27	50.41	66.35	86.96	49.33	57.19	58.8	60.6	157.72	83.17	73.86	40.58	59.04	54.45	61.37	58.7	67.32
5	35	60	41.56	61.7	51.29	61.42	66.33	64.28	58.21	60.05	45.31	66.33	85.1	46.34	57.52	58.35	60.58	158.64	84.53	70.12	40.04	56.35	56.2	59.63	59.29	67.17
5	36	60	49.85	62.64	54.8	67.62	71.62	69.37	62.28	65.7	52.19	71.64	90.49	51.54	60.89	63.65	64.92	159.47	90.14	81.42	46.22	62.45	61.78	63.44	64.57	72.26
5	37	60	56.59	71.52	60.59	74.12	77.58	75.86	68.4	71.86	60.53	76.51	94.97	57.73	67.44	65.71	71.08	165.39	95.31	92.99	50.03	68.35	65.88	70.86	70.44	76.15
5	38	60	54.63	72.11	55.12	71.42	76.47	74.25	68.67	68.52	59.31	73.89	93.36	56.6	66.51	65.13	67.21	163.53	92.2	90.54	49.61	67.44	63.21	67.5	66.98	70.67
5	39	60	50.51	70.28	53.44	69.55	73.93	71.84	66.84	65.5	57.04	72.38	91.16	54.58	65.94	65.74	64.79	162.07	92.52	88.52	48.52	64.95	60.73	65.5	65.94	70.09
5	40	60	43.43	65.04	51.95	66.67	69.28	67.52	62.31	60.81	51.44	70.2	87.13	50.57	64.48	66.66	61.76	159.7	94.34	83.82	46.16	59.61	56.84	62.67	65.25	71.72

## Sheet: Cq Results
Data step:	4			Show channel:	Thresholds:
Sample Group:	Default		Ch 1	No
Method:	Threshold		Ch 2	No
Smoothing:	ON		Ch 3	No
Smoothing window:	5		Ch 4	No
Baseline:	Trend		Ch 5	Yes	206.46
Baseline range start:	3
Baseline range end:	7
Well	Replicate	Fluorophore	Sample Type	Sample Name	Target	Cq	Quantity	Omitted	Description
A01-Ch5		[none]	[none]			NeuN	0
A02-Ch5		[none]	[none]			NeuN	0
A03-Ch5		[none]	[none]			NeuN	0
A04-Ch5		[none]	[none]			NeuN	0
A05-Ch5		[none]	[none]			NeuN	0
A06-Ch5		[none]	[none]			NeuN	0
A07-Ch5		[none]	[none]			NeuN	0
A08-Ch5		[none]	[none]			NeuN	0
A09-Ch5		[none]	[none]			NeuN	0
A10-Ch5		[none]	[none]			NeuN	0
A11-Ch5		[none]	[none]			NeuN	0
A12-Ch5		[none]	[none]			NeuN	0
A13-Ch5		[none]	[none]			NeuN	0
A14-Ch5		[none]	[none]			NeuN	0
A15-Ch5		[none]	[none]			NeuN	0
A16-Ch5		[none]	[none]			NeuN	0
B01-Ch5		[none]	[none]			NeuN	0
B02-Ch5		[none]	[none]			NeuN	0
B03-Ch5		[none]	[none]			NeuN	0
B04-Ch5		[none]	[none]			NeuN	0
B05-Ch5		[none]	[none]			NeuN	0
B06-Ch5		[none]	[none]			NeuN	0
B07-Ch5		[none]	[none]			NeuN	0
B08-Ch5		[none]	[none]			NeuN	0
B09-Ch5		[none]	[none]			NeuN	0
B10-Ch5		[none]	[none]			NeuN	0

## Sheet: Melt Curve Data
Sample Group:	Default		Show channel:
Smoothing:	ON		Ch 1	No
Smoothing window:	9		Ch 2	No
Low limit	63.5		Ch 3	Yes
High limit	91.5		Ch 4	No
Max # of peaks:	1		Ch 5	Yes
Peak threshold:	10
Slope Correction:	Yes
Derivative:	Negative
Temp	Channel	A1	A2	A3	A4	A5	A6	A7	A8	A9	A10	A11	A12	A13	A14	A15	A16	B1	B2	B3	B4	B5	B6	B7	B8	B9
60	3	15.36	20.17	17.71	7.59	10.76	63.29	17.34	26.54	2.52	10.38	26.23	45.64	5.88	4.82	2.36	25.21	19.79	22.08	2.07	13.41	13.57	10.01	14.96	42.25	17.2
60	5	1066.99	1204.55	1104.71	1126.96	1329.4	1167.47	1096.16	1112.36	1031.83	1044.16	1068.33	861.11	1046.47	1026.45	916.8	491.45	1086.93	1283.85	857.01	1098.48	1136.11	1031.1	1093.28	1221.95	1106.72
60.2	3	13.75	20.31	15.19	5.37	11.64	62.99	17.63	24.08	3.84	12.49	24.63	47.87	4.46	4.56	4.42	24.12	19.83	21.39	2.01	13.62	13.03	10.3	15.96	43.03	16.05
60.2	5	1062.07	1200.84	1102.62	1122.69	1325.34	1163.32	1094.35	1109.37	1031.58	1043.21	1065.87	861.87	1044.74	1022.66	913.33	490.22	1082.11	1281.54	859.03	1096.87	1135.43	1029.84	1093.2	1220.8	1105.82
60.4	3	12.44	20.32	13.21	3.74	12.21	62.65	17.89	22.25	4.98	14.24	23.38	50.08	3.28	4.25	5.73	23.22	19.82	20.98	1.95	13.74	12.72	10.52	16.71	43.49	15.33
60.4	5	1057.44	1197.29	1100.54	1118.71	1321.44	1159.54	1092.81	1106.53	1031.45	1042.32	1063.25	862.37	1042.82	1019.13	909.41	488.99	1077.57	1279.07	860.78	1095.16	1134.5	1028.71	1093.05	1219.42	1104.86
60.6	3	11.43	20.19	11.77	2.69	12.47	62.3	18.12	21.02	5.94	15.62	22.49	52.28	2.33	3.89	6.28	22.49	19.76	20.85	1.89	13.77	12.64	10.67	17.22	43.64	15.01
60.6	5	1053.09	1193.91	1098.46	1115	1317.7	1156.13	1091.53	1103.85	1031.43	1041.5	1060.48	862.59	1040.71	1015.86	905.04	487.77	1073.3	1276.45	862.26	1093.36	1133.32	1027.7	1092.85	1217.81	1103.83
60.8	3	10.71	19.94	10.87	2.21	12.42	61.91	18.31	20.42	6.71	16.65	21.97	54.46	1.61	3.48	6.09	21.94	19.64	20.98	1.83	13.72	12.8	10.76	17.48	43.49	15.12
60.8	5	1049.03	1190.69	1096.4	1111.57	1314.12	1153.11	1090.51	1101.31	1031.54	1040.74	1057.56	862.54	1038.4	1012.85	900.22	486.54	1069.29	1273.67	863.46	1091.45	1131.89	1026.8	1092.58	1215.98	1102.73
61	3	10.09	19.49	10.47	2.34	11.79	61.21	17.99	20.76	6.69	17.67	22.46	55.97	0.83	3.18	3.28	23.33	19.52	21.16	0.9	13.72	13.22	10.6	16.77	43.41	15.5
61	5	1047.49	1190.27	1096.49	1111.53	1314.22	1152.88	1092.98	1101.19	1034.62	1041.73	1056.9	863.74	1037.81	1012.47	896.16	486.94	1067.26	1273.27	865.64	1091.81	1132.1	1028.37	1094.47	1216.43	1104.63
61.2	3	9.4	17.92	9.92	1.91	10.43	59.67	18.14	21.25	6.95	17.77	21.45	57.4	0	1.97	1.2	20.38	17.67	20.66	0	11.99	13.16	9.76	16.33	41.68	15.67
61.2	5	1044.55	1187.68	1093.65	1107.85	1310.73	1150.58	1092.43	1099.43	1033.53	1040.76	1052.46	863.1	1035.08	1009.08	891.14	484.79	1064.17	1270.33	866.37	1089.26	1130.04	1027.65	1093.96	1214.52	1102.46
61.4	3	9.82	16.95	10.81	2.77	9.02	58.63	18.68	21.15	7.35	16.24	22.5	60.21	0.38	0.78	0	18.07	17.94	22.1	1.43	12.08	13.75	9.89	16.88	40.5	17.21
61.4	5	1039.68	1182.49	1089.75	1102.98	1304.58	1146.35	1088.54	1094.22	1031.99	1039.57	1046.86	861.4	1029.98	1004.72	883.58	482.67	1058.98	1265.03	865.26	1086.18	1126.41	1025.19	1091.29	1209.24	1098.31
61.6	3	11.1	17.02	12.63	4.34	9.91	58.13	19.64	22.48	9.8	16.19	23.18	64.12	1.1	0.48	0.88	16.89	17.68	23.3	3.6	13.49	15.72	11.23	18.7	40.13	18.54
61.6	5	1034.56	1178.51	1086.45	1098.56	1299.1	1143.73	1085.68	1091.24	1031.18	1038.84	1042.55	860.56	1026.44	1000.38	877.05	480.54	1054.91	1260.13	865.11	1082.28	1122.73	1022.66	1090.32	1205.07	1095.18
61.8	3	12.92	18.93	14.4	6.29	12.46	59.01	19.94	24.98	12.29	17.3	24.22	71.34	2.78	2.65	2.74	19.72	18.34	23.82	5.11	14.89	16.19	13.01	19.68	40.06	20.25
61.8	5	1026.1	1171.88	1081.27	1090.35	1290.63	1139.26	1082.29	1085.47	1027.7	1034.27	1036.21	858.13	1021.27	995.13	869.14	476.74	1046.84	1253.23	862.17	1074.85	1116.34	1019.03	1086.49	1199.27	1090.13
62	3	15.09	20.71	15.62	7.17	14.11	57.64	22.22	26.82	14.76	19.06	25.29	78.11	4.06	3.98	5.52	23.69	18.47	24.51	6.13	15.84	16.63	14.1	19.44	41.61	21.02
62	5	1020.43	1166.6	1076.23	1083.63	1284.22	1134.8	1078.63	1080.84	1026.47	1030.52	1030.45	855.67	1016.16	990.06	863.87	473.14	1039.22	1246.25	860.27	1069.43	1110.79	1014.22	1082.3	1194.96	1086.61
62.2	3	16.08	22.52	15.56	7.49	14.73	57.17	24.2	27.77	16.97	20.26	26.49	86.29	3.8	4.8	6.91	24.07	18.67	24.13	7.39	17.4	18.03	16.15	20.06	42.4	22.39
62.2	5	1018.74	1164.93	1073.78	1080.55	1282.13	1134.1	1078.65	1079.84	1027.05	1029.16	1028.28	856.05	1014.56	988.38	860.91	471.14	1035.04	1243.73	860.19	1066.9	1107.7	1013.87	1080.66	1192.63	1084.7
62.4	3	15.94	23.57	15.94	8.19	15.87	56.71	25.79	28.53	17.52	21.63	27.93	96.77	5.01	5.43	6.63	24.14	19.94	23.86	7.94	17.72	18.53	17.67	20.66	43.33	24.54
62.4	5	1019.1	1164.84	1074.24	1079.7	1282.51	1135	1080.16	1079.51	1030.12	1029.08	1027.74	856.76	1015.04	987.36	858.27	468.84	1034.17	1242.88	862.5	1066.63	1107.18	1015.8	1081.12	1192.62	1086.8
62.6	3	15.49	24.75	15.4	8.41	14.91	56.7	26.82	28.43	17.53	24.02	27.51	106.67	6.4	5.58	5.99	25.14	20.72	24.19	8.26	17.69	18.93	17.85	20.43	43.09	25.91
62.6	5	1018.34	1164.3	1073.19	1078.21	1280.94	1135.03	1079.46	1078.03	1031.86	1027.51	1025.3	856.02	1014.59	986.65	853.94	467.63	1031.82	1240.43	864.52	1064.42	1106.24	1015.79	1079.82	1191.41	1087.52
62.8	3	14.11	24.25	13	6.2	11.9	53.87	26.42	25.98	15.75	23.66	24.29	115.27	5.67	4.15	3.54	19.64	19.74	23.01	7.6	16.38	18.18	16.03	19.31	39.81	25.2
62.8	5	1015.24	1161.78	1069.52	1073.33	1276.59	1131.99	1076.24	1074.21	1029.05	1024.31	1019.43	853.96	1012.71	981.76	848.65	465.48	1027.66	1236.61	864.24	1060.36	1102.38	1013.95	1075.68	1187.14	1083.51
63	3	13.79	23.41	12.54	3.65	10.44	51.75	26.78	23.98	14.38	22.8	23.39	125.03	6.27	3.79	2	16.67	19.14	23.02	8.88	15.53	18.76	15.69	18.68	37.32	25.49
63	5	1010.22	1155.54	1064.68	1067.92	1269.01	1126.44	1070.68	1067.39	1025.6	1020.3	1014.46	851.95	1008.96	977.62	842.11	462.94	1022.12	1228.87	862.01	1056.4	1097.21	1010.08	1071.41	1181.44	1079.81
63.2	3	12.52	21.73	11.76	2.49	9.11	49.29	25.53	23.37	13.61	22.2	21.09	133.52	6.46	2.69	2.06	14.58	17.19	23	9.64	14.81	16.36	14.74	18.71	35	25.09
63.2	5	1006.34	1151.51	1062.14	1064.25	1263.83	1123.31	1067.52	1064.46	1022.83	1018.63	1011.03	852.19	1007.72	974.35	838.35	461.4	1019.66	1222.98	862.3	1052.96	1093.47	1008.44	1069.14	1178.38	1077.43
63.4	3	11.86	20.35	11.52	0.73	7.81	45.89	24.27	22.93	13.67	21.25	19.51	141.58	6.86	2.51	2.12	14.53	15.52	22.52	9.72	13.68	13.03	13.08	16.41	31.88	22.55
63.4	5	996.04	1140.85	1053.78	1054.99	1252.6	1114.25	1058.78	1054.6	1014.23	1008.94	1001.97	846.44	1000.23	964.92	829.26	456.9	1011.06	1211.36	856.77	1043.52	1084.19	1000.73	1060.48	1167.61	1068.52
63.6	3	11.83	19.51	11.99	0	7.22	43.06	25.08	22.51	14.56	20.71	19.49	146.4	6.59	2.12	2.99	17.17	14.9	21.79	10.24	14.2	12.76	12.61	14.26	29.45	21.32
63.6	5	984.4	1126.8	1042.8	1044.15	1237.09	1101.85	1048.75	1042.53	1003.84	997.07	990.38	837.65	990.28	952.88	817.85	451.04	999.65	1197.82	848.6	1032.39	1071.88	989.25	1049.38	1153.89	1058.77
63.8	3	10.84	17.78	12.08	0	6.62	41.77	24.78	22.74	15.01	19.65	18.88	147.94	4.1	1.94	3.41	18.15	14.26	20.71	9.82	15.13	12.21	12.48	13.48	28.59	21.02
63.8	5	974.89	1115.94	1034.06	1034.18	1225.98	1092.45	1040.65	1033.85	993.87	987.07	981.24	831.26	982.2	944.01	808.11	445.66	991.55	1186.98	842.59	1022.95	1061.58	981.67	1039.19	1142.01	1050.48
64	3	10.01	17.79	14.69	2.03	9.01	41.49	25.5	24.29	15.39	20.13	20.47	146.24	5.64	3.59	3.13	17.87	16.78	22.08	10.87	16.6	13.8	14.35	14.27	29.76	23.55
64	5	968.32	1108.26	1027.49	1027.81	1216.94	1086.17	1034.58	1025.37	987.35	979.65	974.15	826.27	975.23	936.63	798.41	439.81	985.25	1178.27	839.12	1016.88	1054.52	975.35	1031.56	1134.36	1044.97
64.2	3	10.22	18.98	16.04	4.75	10.62	40.84	26.83	24.9	17.12	22.69	21.46	139.82	6.58	5.55	3.84	20.45	18.31	22.09	10.92	17.45	15.52	14.39	15.19	30.37	25.05
64.2	5	960.91	1099.82	1019.51	1020.87	1209.12	1079.26	1026.65	1017.08	980.26	972.28	965.29	820.21	968.62	929.95	789.73	436.48	977.4	1169.75	834.57	1009.18	1046.06	968.81	1023.17	1126.7	1038.81

## Sheet: Melting curve Results
Sample Group:	Default		Show channel:
Smoothing:	ON		Ch 1	No
Smoothing window:	9		Ch 2	No
Low limit	63.5		Ch 3	Yes
High limit	91.5		Ch 4	No
Max # of peaks:	1		Ch 5	Yes
Peak threshold:	10
Slope Correction:	Yes
Derivative:	Negative
Well	Replicate	Fluorophore	Sample Type	Sample Name	Target	Melt Temp 1	Peak Height 1	FW/HM Peak 1	Area Peak 1	Melt Temp 2	Peak Height 2	FW/HM Peak 2	Area Peak 2	Melt Temp 3	Peak Height 3	FW/HM Peak 3	Area Peak 3	Melt Temp 4	Peak Height 4	FW/HM Peak 4	Area Peak 4	Description
A01-Ch3		[none]	[none]			67.24	17.9801355788313	0.525381688512862	10.0546490591622	0	0	0	0	0	0	0	0	0	0	0	0
A01-Ch5		[none]	[none]			85.34	716.4969667267	1.25321548504285	955.73861075981	0	0	0	0	0	0	0	0	0	0	0	0
A02-Ch3		[none]	[none]			76.78	25.7004818850635	0.413790654319525	11.3193408255033	0	0	0	0	0	0	0	0	0	0	0	0
A02-Ch5		[none]	[none]			85.22	762.563369857565	1.31489739717278	1067.25163370313	0	0	0	0	0	0	0	0	0	0	0	0
A03-Ch3		[none]	[none]			66.9099999999999	14.7240502256305	0.636669246289507	9.97792384913842	0	0	0	0	0	0	0	0	0	0	0	0
A03-Ch5		[none]	[none]			85.0699999999999	678.300126100699	1.32467080379468	956.376475349558	0	0	0	0	0	0	0	0	0	0	0	0
A04-Ch3		[none]	[none]			0	0	0	0	0	0	0	0	0	0	0	0	0	0	0	0
A04-Ch5		[none]	[none]			85.21	758.917225092964	1.24402775180577	1004.90151626956	0	0	0	0	0	0	0	0	0	0	0	0
A05-Ch3		[none]	[none]			66.9499999999999	22.0631930320849	0.581432374231517	13.6542106007104	0	0	0	0	0	0	0	0	0	0	0	0
A05-Ch5		[none]	[none]			85.19	871.910048829182	1.2157657732354	1128.28968677955	0	0	0	0	0	0	0	0	0	0	0	0
A06-Ch3		[none]	[none]			88.02	84.8992174892275	0.234762759876251	21.4690575862077	0	0	0	0	0	0	0	0	0	0	0	0
A06-Ch5		[none]	[none]			85.0699999999999	720.052817521777	1.27657565079234	978.385332453266	0	0	0	0	0	0	0	0	0	0	0	0
A07-Ch3		[none]	[none]			72.98	50.6002462948451	0.717852691100165	38.6622376724184	0	0	0	0	0	0	0	0	0	0	0	0
A07-Ch5		[none]	[none]			85.17	686.176352330015	1.1732076080713	856.859547653167	0	0	0	0	0	0	0	0	0	0	0	0
A08-Ch3		[none]	[none]			76.09	89.4665867667213	0.593847605381906	56.5502984378602	0	0	0	0	0	0	0	0	0	0	0	0
A08-Ch5		[none]	[none]			85.21	691.756836601022	1.21109017136316	891.720934075486	0	0	0	0	0	0	0	0	0	0	0	0
A09-Ch3		[none]	[none]			76.29	12.4871245510941	0.624190485912189	8.29618849590048	0	0	0	0	0	0	0	0	0	0	0	0
A09-Ch5		[none]	[none]			85.21	611.966077206828	1.21975928865946	794.512081446022	0	0	0	0	0	0	0	0	0	0	0	0
A10-Ch3		[none]	[none]			74.22	41.0210232313281	0.736873341642693	32.1735036096664	0	0	0	0	0	0	0	0	0	0	0	0
A10-Ch5		[none]	[none]			85.21	626.888469284535	1.22574265459101	817.87814586063	0	0	0	0	0	0	0	0	0	0	0	0
A11-Ch3		[none]	[none]			76.76	133.957527464153	0.621963552004472	88.6811018958154	0	0	0	0	0	0	0	0	0	0	0	0
A11-Ch5		[none]	[none]			85.27	607.280884976328	1.45494039359218	940.445938945179	0	0	0	0	0	0	0	0	0	0	0	0
A12-Ch3		[none]	[none]			76.47	51.0458153647751	0.282146170377731	15.3145688481329	0	0	0	0	0	0	0	0	0	0	0	0
A12-Ch5		[none]	[none]			85.2699999999999	516.354183927083	1.31750745708779	724.102096824173	0	0	0	0	0	0	0	0	0	0	0	0
A13-Ch3		[none]	[none]			0	0	0	0	0	0	0	0	0	0	0	0	0	0	0	0
