# Supplementary material for: Genome-wide identification of gene families related to miRNA biogenesis in Mangifera indica L. and their possible role during heat stress
Source: PeerJ. 2024 Jul 17;12:e17737. doi: 10.7717/peerj.17737 (PMC11260077; doi:10.7717/peerj.17737)
Supplement: Supplemental Information 22 [file peerj-12-17737-s022.xlsx]

## Sheet: General Info
General Info
Ord File Name	C:\Users\Propietario\Documents\Andrés\Corrida final Controles HASTY 13 julio 2018.ord
Software Version	2.2.250.602
Instrument Name	PR0961400539
Instrument Serial	PR0961400539
Instrument Version	PCR 2.3.2, RT 1.1.12.23
Used Data Step	1
Sample Group	Default
Protocol Log	StartTime: 13/07/2018 01:18:49 p.m.
	RunTime: 01:20:42
	Path: /SHARED/PCPTP
	No errors

## Sheet: Plate
Well	Fluorophore	Sample Type	Target	Description	Quantity	AD Std Value	Replicate	Sample Name		Sample Group	Default
A01-Ch1	[none]	[none]			0						A1
A01-Ch2	[none]	[none]			0						A2
A01-Ch3	ROX	Unknown	HASTY		0						A3
A01-Ch4	[none]	[none]			0						A4
A01-Ch5	SYBR	Unknown	HASTY		0						A5
A02-Ch1	[none]	[none]			0						A6
A02-Ch2	[none]	[none]			0						A7
A02-Ch3	ROX	Unknown	HASTY		0						A8
A02-Ch4	[none]	[none]			0						A9
A02-Ch5	SYBR	Unknown	HASTY		0						A10
A03-Ch1	[none]	[none]			0						A11
A03-Ch2	[none]	[none]			0						A12
A03-Ch3	ROX	Unknown	HASTY		0						A13
A03-Ch4	[none]	[none]			0						A14
A03-Ch5	SYBR	Unknown	HASTY		0						A15
A04-Ch1	[none]	[none]			0						A16
A04-Ch2	[none]	[none]			0						B1
A04-Ch3	ROX	Unknown	HASTY		0						B2
A04-Ch4	[none]	[none]			0						B3
A04-Ch5	SYBR	Unknown	HASTY		0						B4
A05-Ch1	[none]	[none]			0						B5
A05-Ch2	[none]	[none]			0						B6
A05-Ch3	ROX	Unknown	HASTY		0						B7
A05-Ch4	[none]	[none]			0						B8
A05-Ch5	SYBR	Unknown	HASTY		0						B9
A06-Ch1	[none]	[none]			0						B10
A06-Ch2	[none]	[none]			0						B11
A06-Ch3	ROX	Unknown	HASTY		0						B12
A06-Ch4	[none]	[none]			0						B13
A06-Ch5	SYBR	Unknown	HASTY		0						B14
A07-Ch1	[none]	[none]			0						B15
A07-Ch2	[none]	[none]			0						B16
A07-Ch3	ROX	Unknown	HASTY		0						C1
A07-Ch4	[none]	[none]			0						C2
A07-Ch5	SYBR	Unknown	HASTY		0						C3
A08-Ch1	[none]	[none]			0						C4
A08-Ch2	[none]	[none]			0						C5
A08-Ch3	ROX	Unknown	HASTY		0						C6
A08-Ch4	[none]	[none]			0						C7
A08-Ch5	SYBR	Unknown	HASTY		0						C8
A09-Ch1	[none]	[none]			0						C9
A09-Ch2	[none]	[none]			0						C10
A09-Ch3	ROX	Unknown	HASTY		0						C11
A09-Ch4	[none]	[none]			0						C12
A09-Ch5	SYBR	Unknown	HASTY		0						C13
A10-Ch1	[none]	[none]			0						C14
A10-Ch2	[none]	[none]			0						C15
A10-Ch3	ROX	Unknown	HASTY		0						C16
A10-Ch4	[none]	[none]			0						D1
A10-Ch5	SYBR	Unknown	HASTY		0						D2
A11-Ch1	[none]	[none]			0						D3
A11-Ch2	[none]	[none]			0						D4
A11-Ch3	ROX	Unknown	HASTY		0						D5
A11-Ch4	[none]	[none]			0						D6

## Sheet: Protocol
Reaction volume	10		Channel in use:
Consumable	1		Ch 1	No
Ramp rate	7		Ch 2	No
Heated lid ON	True		Ch 3	Yes (ROX)
Heated lid temperature	105		Ch 4	No
			Ch 5	Yes (SYBR)
	No	Cycle	Type	Information
	1		Temperature	Temp.: 95°C; Time:07:00
	2		Cycle	Number of cycles to loop:40; Number of steps inside loop:2
	3	*	. Temperature	Temp.: 95°C; Time:00:05
DA	4	*	. Temperature	Temp.: 60°C; Time:00:30; Data acquisition:True
	5		Temperature	Temp.: 60°C; Time:00:30
	6		Melting Curve	Start temperature:60°C; End temperature:95°C; Hold time:00:01; Temperature increment after hold:0.2°C
	7		Temperature	Temp.: 20°C; Time:00:10

## Sheet: Acquired Data 1
Data step:	4			Show channel:	Thresholds:
Sample Group:	Default		Ch 1	No
Method:	Threshold		Ch 2	No
Smoothing:	ON		Ch 3	No
Smoothing window:	5		Ch 4	No
Baseline:	Trend		Ch 5	Yes	169.69
Baseline range start:	3
Baseline range end:	7
Channel	Cycle	Temp	A1	A2	A3	A4	A5	A6	A7	A8	A9	A10	A11	A12	A13	A14	A15	A16	B1	B2	B3	B4	B5	B6	B7	B8
5	1	60	-1.12	-0.5	0	-0.22	-0.01	0.27	-1.19	-1.92	-1.54	1.76	0.39	-0.64	0.77	-1.2	-2.03	1.55	-0.51	2.02	1.08	0.93	3.08	4.06	1.39	2.12
5	2	60	1.31	1.02	0.92	1.43	1.83	2.38	1.15	1.2	2.29	2.46	1.36	1.7	0.5	0.79	1.07	3.78	1.41	1.47	2.08	1.73	2.57	2.59	1.93	2.51
5	3	60	3.07	2.4	2.04	2.87	3.25	3.8	2.97	3.44	4.59	3.16	2.37	3.74	1.41	2.66	3.08	6.71	2.88	1.59	2.82	2.4	2.62	2.16	2.72	2.95
5	4	60	4.3	3.85	4.1	3.77	3.61	4.95	4.69	5.19	5.27	3.93	3.55	6.47	4.67	4.54	3.96	10.98	3.98	2.56	3.55	3.27	4.27	3.52	4.51	3.51
5	5	60	3.3	3.62	3.3	3.51	3.75	3.46	4.83	4.21	4.73	3.63	3.07	5.13	4.81	4.33	2.89	12.5	3.57	2.26	2.29	2.89	3.47	2.35	3.57	2.71
5	6	60	1.95	1.92	1.82	1.38	1.65	1.11	3.01	2.22	1.43	1.36	1.25	1.92	1.89	1.04	0.94	10.52	2.1	1.01	-0.01	1.04	1.56	0.08	0	0.56
5	7	60	-3.24	-2.75	-2.79	-3.5	-2.64	-3.13	-2.02	-1.9	-2.44	-4.17	-3.82	-4.11	-4.68	-3.46	-2.9	4.88	-2.81	-3.22	-4.1	-2.74	-3.79	-5.07	-5.06	-4.5
5	8	60	-6.65	-6.17	-5.25	-6.24	-6.27	-5.87	-6.53	-5.85	-6.79	-6.9	-7.76	-7.04	-7.26	-6.48	-5.22	1.45	-6.35	-5.25	-5.9	-6.53	-8.03	-7.34	-7	-7.9
5	9	60	-8	-7.06	-6.87	-8.28	-7.98	-8.45	-7.74	-8.83	-8.54	-7.64	-8.44	-8.44	-6.87	-7.57	-7.51	0	-8.28	-7.5	-7.29	-7.8	-9.09	-8.27	-8.35	-9.45
5	10	60	-5.33	-4.77	-5.93	-6.09	-6.76	-7.69	-5.28	-6.88	-8.3	-6.47	-5.28	-6.14	-5.31	-6.27	-5.55	0.56	-6.91	-5.58	-5.48	-5.98	-6.24	-5.67	-6.78	-6.63
5	11	60	-0.55	0.94	-1.4	-0.47	-0.86	-2.11	-1.63	-0.61	-1.59	-2.25	1.35	-0.85	-1.71	0.4	0.48	7.6	-2.08	-1.59	-0.96	-2.13	-1.27	-0.44	-1.13	-0.51
5	12	60	3.97	3.97	2.91	4.15	3.17	3.09	2.35	4.7	3.62	2.41	5.39	4.69	3.04	4.77	4.49	16.26	3.72	3.98	3.85	2.08	2.79	3.74	4.3	4.43
5	13	60	3.8	2.56	4.25	4.36	3.99	3.53	2.63	4.52	4.19	2.98	4.91	3.31	3.44	4.36	3.91	21	4.47	4.43	3.21	4.55	2.92	2.89	4.14	4.51
5	14	60	-0.45	-0.54	1.38	1.28	0.59	0.63	1.14	1.07	0.63	0.6	1.1	-0.53	0.9	0.92	1.44	18.04	1.91	1.55	1.55	4.02	0.84	1.26	1.28	2.37
5	15	60	-0.03	-1.32	-0.04	0.08	0.36	-0.13	-0.18	-1.86	-0.51	-0.31	-0.12	-1.8	0.39	-0.18	1.01	16.73	0.28	-0.83	0.91	1.24	-0.23	-0.24	0.62	0.74
5	16	60	1.69	-0.56	-1	1.04	0.62	-0.13	0.55	-1.19	-0.07	1.07	0.92	-0.7	1.79	0.14	0.78	18.8	0.98	0.49	1.49	0.35	0.73	0.87	1.18	1.05
5	17	60	2.03	-0.28	-0.08	1.6	0.53	-0.48	-0.43	0.04	-0.17	1.33	0.78	0.13	1.89	0.75	0.72	18.51	1.22	1.45	0.15	0.16	1.27	0.82	1.73	0.38
5	18	60	-0.26	-0.06	0.35	-0.59	-1.3	0.27	-1.38	-0.04	-0.93	0.61	0.3	-1.31	1.02	0.74	0.17	16.9	0.69	1.25	-0.45	0.07	0.19	0.93	1.32	-0.2
5	19	60	0.14	0.55	0.33	-1.19	-1.48	0.13	-2.33	-1.23	-1.15	-1.67	-0.83	-2.11	0.18	-0.01	-1.44	14.4	-0.38	-0.25	-0.54	-0.46	-1.64	-1.47	-0.2	-0.79
5	20	60	0.11	1.62	0.17	-0.88	-0.25	0.79	-0.72	-0.61	-0.01	0.33	-0.94	-1.53	-0.27	-0.55	-0.36	15.8	-0.74	0.15	0.57	0.24	-1.74	-0.66	-0.43	0.78
5	21	60	-0.03	0.17	0.45	-0.17	-0.18	-0.36	-0.32	0.15	0.35	0.37	-1.06	0.28	-0.58	-0.63	0.06	15.25	-0.45	0.02	1.18	-0.15	-0.98	-0.28	0.24	1.36
5	22	60	1.14	1.4	1.32	2.18	1.64	1.06	1.65	0.35	0.9	1.22	-0.45	1.81	0.85	0.91	4.16	15.91	1.29	1.81	2.88	0.43	0.79	1.87	3.48	3.18
5	23	60	4.81	2.87	1.97	4.69	2.72	2.9	1.92	1.26	1.65	0.62	0.56	1.53	3.65	3.01	6.49	15.1	3.67	3.49	4.65	0.36	1.8	2.31	6.21	6.37
5	24	60	7.93	5.61	3.18	6.82	4.84	5.41	2.85	2.58	2.39	1.28	1.4	1.74	8.86	6.43	9.69	15.03	6.01	6.52	6.62	1.73	2.25	3.48	11.83	12.12
5	25	60	11.54	8.09	6.4	9.2	6.27	6.9	0.99	3.36	1.74	-0.16	1.93	1.14	14.72	11.36	11.16	14.76	10.76	11.56	9.22	2.04	1.84	3.9	19.52	19.36
5	26	60	21.39	18.36	14.91	18.44	12.64	12.79	2.11	6.04	3.96	0.46	3.43	1.62	28.12	23.95	22.83	14.63	22.58	23.02	17.42	3.84	2.64	7.41	38.56	33.89
5	27	60	44.44	37.57	31.06	34.5	24.79	26.92	5.81	12.49	11.16	2.26	8.08	2.63	55.08	49.94	46.33	13.81	46.34	46.17	36.24	7.16	5.73	13.46	73.16	61.89
5	28	60	84.86	73.82	61.27	65.18	46.48	52.15	14.38	24.96	22.46	6.13	14.98	6.67	104.54	95.37	92.49	13.71	91.33	86.03	70.63	14.82	10.87	22.64	137.41	117.44
5	29	60	156.77	139.22	115.89	120.78	86.85	100.3	27.23	45.58	42.18	12.34	28.09	14.46	191.32	176.31	169.88	15.5	171.67	158.45	125.96	27.6	21.42	41	243.91	217.07
5	30	60	276.9	248.71	204.54	222.33	163.09	188.19	52.16	86.09	82.29	24.96	55.18	29.49	327.76	301.67	291.26	16.3	302.84	277.22	216.03	52.95	42.48	79.24	405.22	378.15
5	31	60	439.05	396.58	315.32	374.22	289	317.79	92.39	157.88	151.29	46.46	102.51	55.28	497.34	460.61	436.73	16.21	471.65	431.37	331.77	97.7	79.09	146.45	589.54	583.74
5	32	60	611.86	560.09	428.03	561.17	466.4	475.12	164.46	280	257.41	87.32	188.27	102.96	662.95	619.12	577.92	15.93	649.66	589.07	448.19	172.78	144.68	256.32	752.9	790.87
5	33	60	758.61	702.6	520.17	741.82	667.27	632.07	279.74	454.2	400.36	164.3	328.56	190.28	791.33	743.23	682.74	18.18	798.15	719.2	539.17	284.42	260	417.3	866.02	951.7
5	34	60	846.91	787.5	577.76	867.84	834.5	744.66	414.18	641.65	540.73	287.82	510.53	321.31	863.86	813.32	739.04	18.42	886.05	795.46	590.31	411	419.32	592.4	920.31	1041.58
5	35	60	890.81	826.24	604.29	933.2	937.07	804.87	530.06	794.91	644.63	453.36	693.24	481.86	895.12	841.69	763.7	18.97	923.86	828.54	614.89	520.97	599.77	737.64	943.66	1081.59
5	36	60	906.63	839.1	613.02	957.84	981.56	823.22	604.4	882.78	696.64	620.68	828.24	631.04	900.42	849.9	774.64	17.4	936.44	834.92	621.77	590.43	748.85	822.62	949.41	1092.09
5	37	60	920.77	849.43	619.58	976.6	1004.9	835.93	646.92	929.46	725.86	757.63	909.46	745.61	907.53	857.82	783.94	16.94	948.52	843.6	628.8	626.53	851.96	869.98	959.19	1099.95
5	38	60	926.79	854.54	623.41	988.02	1019.01	844.87	668.2	954.95	744.62	844.31	949.2	812.73	916.13	866.44	786.01	16.98	955.45	851.72	633.96	643.42	908.26	893.43	961.74	1108.75
5	39	60	931.51	856.91	626.57	995.07	1027.75	851.82	681.31	971.37	756	893.18	973.06	850.85	919.96	870.89	787.03	17.7	959.48	855.98	638.08	654.67	942.59	909.39	962.34	1114.38
5	40	60	934.26	857.03	628.81	997.35	1030.24	857.13	683.13	976.35	759.99	902.61	975.31	856.39	921.55	872.62	786.03	19.42	960.71	858.32	642.06	657.13	950.29	914.24	961.18	1119.07

## Sheet: Cq Results
Data step:	4			Show channel:	Thresholds:
Sample Group:	Default		Ch 1	No
Method:	Threshold		Ch 2	No
Smoothing:	ON		Ch 3	No
Smoothing window:	5		Ch 4	No
Baseline:	Trend		Ch 5	Yes	169.69
Baseline range start:	3
Baseline range end:	7
Well	Replicate	Fluorophore	Sample Type	Sample Name	Target	Cq	Quantity	Omitted	Description
A01-Ch5		SYBR	Unknown		HASTY	29.11	NeuN
A02-Ch5		SYBR	Unknown		HASTY	29.28	NeuN
A03-Ch5		SYBR	Unknown		HASTY	29.61	NeuN
A04-Ch5		SYBR	Unknown		HASTY	29.48	NeuN
A05-Ch5		SYBR	Unknown		HASTY	30.05	NeuN
A06-Ch5		SYBR	Unknown		HASTY	29.79	NeuN
A07-Ch5		SYBR	Unknown		HASTY	32.05	NeuN
A08-Ch5		SYBR	Unknown		HASTY	31.1	NeuN
A09-Ch5		SYBR	Unknown		HASTY	31.17	NeuN
A10-Ch5		SYBR	Unknown		HASTY	33.04	NeuN
A11-Ch5		SYBR	Unknown		HASTY	31.78	NeuN
A12-Ch5		SYBR	Unknown		HASTY	32.76	NeuN
A13-Ch5		SYBR	Unknown		HASTY	28.75	NeuN
A14-Ch5		SYBR	Unknown		HASTY	28.92	NeuN
A15-Ch5		SYBR	Unknown		HASTY	29	NeuN
A16-Ch5		SYBR	NTC		HASTY	NeuN	0
B01-Ch5		SYBR	Unknown		HASTY	28.98	NeuN
B02-Ch5		SYBR	Unknown		HASTY	29.09	NeuN
B03-Ch5		SYBR	Unknown		HASTY	29.49	NeuN
B04-Ch5		SYBR	Unknown		HASTY	31.96	NeuN
B05-Ch5		SYBR	Unknown		HASTY	32.22	NeuN
B06-Ch5		SYBR	Unknown		HASTY	31.21	NeuN
B07-Ch5		SYBR	Unknown		HASTY	28.3	NeuN
B08-Ch5		SYBR	Unknown		HASTY	28.52	NeuN
B09-Ch5		SYBR	Unknown		HASTY	28.49	NeuN
B10-Ch5		SYBR	Unknown		HASTY	29.56	NeuN

## Sheet: Melt Curve Data
Sample Group:	Default		Show channel:
Smoothing:	ON		Ch 1	No
Smoothing window:	9		Ch 2	No
Low limit	63.5		Ch 3	Yes
High limit	91.5		Ch 4	No
Max # of peaks:	1		Ch 5	Yes
Peak threshold:	10
Slope Correction:	Yes
Derivative:	Negative
Temp	Channel	A1	A2	A3	A4	A5	A6	A7	A8	A9	A10	A11	A12	A13	A14	A15	A16	B1	B2	B3	B4	B5	B6	B7	B8	B9
60	3	14.15	22.11	19.96	18.08	14.76	0	159.82	60.18	6.85	2.23	20.42	0.62	9.76	16.67	0.47	24.76	25.55	33.79	30.24	33.63	26.95	13.88	18.82	28.02	8.5
60	5	1011.43	939.52	694.42	1081.31	1119.97	936.9	750.86	1065.28	840.19	999.33	1068.64	949.14	1007.85	946.39	862.73	109.62	1039.37	922.8	698.54	723	1042.2	1002.55	1043.1	1205.49	997.56
60.2	3	14.37	22.14	19.19	16.71	15.84	2.09	159.78	59.83	8.12	3.9	19.4	1.06	10.72	15.1	0.11	27.73	25.75	35.23	29.67	34.27	27.57	13.22	18.66	25.32	8.7
60.2	5	1024.39	952.03	704.73	1094.35	1135.02	947.34	759.95	1081.14	852.25	1012.34	1084.02	961.73	1021.12	958.44	873.38	110.49	1051.73	931.14	709.77	730.82	1057.2	1015.31	1058.15	1219.5	1010.75
60.4	3	14.83	22.2	18.72	15.86	16.66	3.87	158.66	59.52	9.28	5.43	18.74	1.54	11.48	13.9	0	30.07	26.04	36.22	29.21	34.56	28.15	12.94	18.63	23.4	9.14
60.4	5	1035.9	963.04	713.68	1105.73	1148.26	956.83	767.63	1094.9	863.08	1023.87	1097.29	972.81	1032.62	968.9	883.02	111	1062.7	938.24	719.29	737.34	1069.97	1026.63	1071.12	1231.53	1022.19
60.6	3	15.53	22.27	18.57	15.53	17.21	5.35	156.46	59.24	10.33	6.82	18.42	2.06	12.06	13.08	0.15	31.78	26.41	36.75	28.84	34.51	28.68	13.04	18.72	22.27	9.84
60.6	5	1045.97	972.55	721.27	1115.46	1159.69	965.39	773.91	1106.56	872.68	1033.91	1108.46	982.38	1042.34	977.76	891.67	111.17	1072.27	944.07	727.09	742.57	1080.51	1036.51	1082.03	1241.58	1031.89
60.8	3	16.47	22.36	18.73	15.71	17.5	6.53	153.18	59	11.27	8.07	18.45	2.63	12.43	12.64	0.55	32.87	26.86	36.84	28.58	34.12	29.16	13.54	18.93	21.92	10.78
60.8	5	1054.61	980.57	727.5	1123.54	1169.31	973.01	778.77	1116.13	881.04	1042.47	1117.51	990.44	1050.29	985.03	899.31	110.98	1080.44	948.66	733.17	746.5	1088.82	1044.95	1090.86	1249.65	1039.85
61	3	18.8	22.57	19.25	16.84	17.05	7.94	148.58	57.92	12.16	9.81	19.26	3.47	11.66	12.94	1.5	32.57	27.68	36.37	28.66	33.51	29.47	14.6	19.72	23.42	12.54
61	5	1067.39	993.36	736.69	1135.45	1183.09	984.91	787.25	1130.45	893.45	1055.48	1131.29	1002.34	1061.83	995.56	911.33	111.35	1093.62	958.42	741.47	753.6	1101.26	1057.48	1103.57	1262.6	1051.85
61.2	3	18.78	23.38	20.51	17.56	16.86	8.49	141.9	58.78	13.64	10.2	20.22	4.49	12.23	14.35	2	32.47	27.86	36.17	28.42	31.87	30.37	15.91	19.64	24.14	13.81
61.2	5	1073.56	998.66	741.11	1140.36	1190.28	991.18	788.5	1135.19	899.46	1061.23	1135.68	1008.2	1065.78	1000.58	916.6	111.06	1099.43	960.46	743.58	754.44	1104.67	1064.41	1108.72	1266.37	1056.85
61.4	3	20.23	23.93	21.4	18.85	16.8	7.73	136.85	59.73	14.04	10.72	20.55	3.66	12.95	15.66	3.08	33.84	29.19	34.63	28.21	31.31	29.62	17.29	19.68	25.35	15.44
61.4	5	1070.63	996.66	739.14	1138.63	1189.04	991.15	784.56	1132.21	899.48	1060.06	1131.62	1007.64	1063.98	998.98	916.19	108.83	1096.56	955.24	739.87	750.97	1100.44	1063.7	1106.22	1261.79	1054.42
61.6	3	21.28	23.42	22.95	20.59	18.45	7.88	129.77	59.98	14.47	11.82	21.18	5.24	15.02	16.24	3.42	35.05	29.4	33.1	27.98	30.89	28.89	18.82	19.63	26.44	15.6
61.6	5	1063.78	989.87	734.07	1131.43	1181.09	986.73	776.74	1123.8	895.21	1052.88	1123.93	1001	1058.34	993.11	911.34	105.7	1089.05	944.63	733.08	742.92	1091.92	1057.14	1098.73	1253.08	1047.24
61.8	3	19.05	21.9	23.04	20.66	18.41	6.94	120.85	59.74	13.82	11.02	21.76	5.1	17.53	15.2	3.18	33.66	28.17	31.66	26.41	30.06	29.28	18.04	18.03	26.51	13.71
61.8	5	1045.81	973.48	721.46	1113.33	1160.39	971.24	761.38	1105.8	880.02	1034.22	1103.43	984.69	1040.33	976.25	897.05	100.35	1070.01	924.79	719.2	727.66	1072.76	1038.48	1080.74	1231.74	1029.01
62	3	17.88	21.07	22.06	20.14	18.45	5.83	110.87	59.46	14.4	11.03	22.06	3.84	16.85	14.44	1.63	32.08	27.3	31.47	25.78	29.38	28.9	17.44	17.05	25.94	11.86
62	5	1033.18	961.78	713.6	1101.82	1145.59	961.14	750.38	1093.38	870.06	1021.71	1090.04	974.37	1029.71	966.54	886.16	96.26	1057.35	912.15	709.19	716.45	1059.37	1027.39	1069.85	1217.14	1014.98
62.2	3	16.73	21.3	21.15	19.65	18.56	5.92	100.63	57.02	14.77	10.81	22.8	2.82	15.05	13.99	1.52	31.03	26.28	32.2	24.91	29.17	28.84	17.33	17.64	25.77	10.5
62.2	5	1018.9	950.41	705.97	1088.81	1134.67	950.9	739.29	1082.5	860.46	1010.54	1077.43	964.25	1019.31	958.97	878.61	92.69	1045.33	898.89	699.4	706.07	1047.04	1018.05	1059.08	1203.61	1003.73
62.4	3	17.14	21.44	19.91	18.46	18.8	6.97	92	55.47	16.17	11.55	23.26	1.39	14.87	15.29	1.65	31.13	25.47	31.47	23.8	27.99	28.51	17.12	18.76	25.94	10.13
62.4	5	1008.66	942.44	700.99	1078.96	1125.79	942.73	730.54	1074.9	854.12	1003.2	1067.17	957.05	1012.09	951.66	871.63	89.14	1037.29	889.67	691.67	697.54	1037.17	1011.6	1051.28	1193.79	995.89
62.6	3	17.81	21.98	18.78	18.84	18.39	8.57	84.43	53.12	16.08	11.57	23.62	2.43	14.7	15.39	2.41	29.85	26.29	31.99	25.29	28.27	28.85	18	20.03	25.6	11.26
62.6	5	1000.06	934.73	694.94	1068.74	1116.57	934.58	722.04	1065.52	846.76	995.17	1056.99	948.78	1002.58	941.95	864.22	85.22	1028.08	880.35	684.85	689.3	1026.56	1003.86	1041.92	1183.28	986.25
62.8	3	18.15	23.31	19.1	19.1	19.9	10.7	78.93	52.78	17.44	11.83	23.53	4.28	14.73	16.87	3.39	30.64	27.44	32.79	25.91	28.57	29.49	18.41	20.72	25.4	12.7
62.8	5	993.59	928.73	691.78	1060.97	1110.74	928.98	714.67	1056.57	840.69	990.59	1049.37	943.54	997.1	935.77	856.98	82.85	1019.91	872.52	678.17	683.16	1018.2	999.9	1035.56	1174.7	980.5
63	3	20.85	23.42	19.47	20.8	21.05	12.55	76.04	52.27	17.87	13	22.82	6.11	17.65	18.23	5.99	32.38	30.69	31.21	27.37	29.59	29.08	19.64	22.42	25.42	15.46
63	5	985.21	921.62	685.86	1051.04	1101.79	921.05	706.52	1045.87	832.96	983.25	1038.96	936.32	990.2	928.55	850.01	79.11	1009.31	861.78	670.53	674.97	1006.92	993.26	1025.83	1162.81	971.36
63.2	3	23.57	23.96	21.37	22.19	22.38	14.79	72.45	51.25	16.89	14.4	23.11	9.86	19.87	18.32	6.49	34.64	33.6	31.1	27.46	30.3	27.89	20.04	22.64	25.73	16.09
63.2	5	983.09	920.03	685.28	1048.6	1098.53	920.57	703.29	1043.24	831.86	982.21	1037.78	935.3	987.13	926.45	849.4	77.42	1007.47	857.35	667.89	672.11	1003.21	991.95	1022.7	1160.1	970.53
63.4	3	23.75	24.36	23.39	22.82	22.13	15.62	69.46	51.35	16.37	14.7	23.59	10.93	21.79	19.34	8.02	35.81	34.56	30.81	27.06	29.04	27.61	19.72	21.77	26.87	17.15
63.4	5	991.85	926.38	690.97	1056.42	1105.29	929.48	708.21	1051.31	838.86	989.58	1045.32	944.16	993.23	934.21	856.86	77.88	1015.23	861.83	671.63	675.93	1008.83	1000.86	1030.3	1167.85	979.07
63.6	3	24.15	25.9	25.41	24.07	22.47	16.33	67.11	52.64	17.7	15.44	23.93	11.28	22.08	18.39	8.78	34.72	35.95	31.94	27.42	28.13	26.81	20.76	21.55	27.01	17.27
63.6	5	1000.74	934.1	698.12	1065.35	1114.31	939.56	713.95	1060.33	849.26	1000.2	1053.84	954.25	1003.13	946.02	868.6	79.25	1025.2	869.63	676.15	681.69	1015.65	1011.66	1039.95	1176.44	988.12
63.8	3	24.5	26.86	26.82	25.27	22.11	16.83	65.44	51.74	18.73	16.87	24.68	12.86	22.46	19.56	10.92	33.91	36.68	31.56	27.31	27.43	28.01	21.51	22.48	29.07	17.7
63.8	5	1007.79	940.89	705.05	1072.37	1122.2	948.81	719.72	1068.04	857.55	1008.57	1061.01	963.59	1012.31	956.85	879.6	80.6	1034.51	874.84	679.16	685.15	1021.82	1021.46	1047.8	1182.99	997.46
64	3	22.99	27.09	26.69	25.41	23.38	17.75	64.11	51.03	20.06	17.59	24.49	12.19	21.72	20.39	12.53	31.56	36.98	31.84	26.76	27.13	28.07	22.43	23.39	30.61	18.7
64	5	1008.03	941.74	707.82	1073.23	1122.44	952.52	718.76	1068.79	861.05	1010.36	1060.06	966.99	1013.66	958.96	882.81	80.21	1037.29	874.82	678.31	684.64	1020.59	1023.47	1048.59	1183.53	998.95
64.2	3	22.52	27.67	26.27	25.52	23.64	17.91	62.17	49.71	21.36	18.16	25.61	13.62	21.71	21.36	12.53	30.07	39.05	32.02	28.03	28.04	28.63	23.21	23.38	30.74	20.35
64.2	5	1001.09	935.05	703.41	1066.7	1114.65	947.73	712.54	1059.42	855.86	1002.91	1051.12	962.52	1005.55	951.52	879.01	78.3	1030.1	867.88	671.39	678.73	1012.02	1016.3	1041.58	1174.58	992.39

## Sheet: Melting curve Results
Sample Group:	Default		Show channel:
Smoothing:	ON		Ch 1	No
Smoothing window:	9		Ch 2	No
Low limit	63.5		Ch 3	Yes
High limit	91.5		Ch 4	No
Max # of peaks:	1		Ch 5	Yes
Peak threshold:	10
Slope Correction:	Yes
Derivative:	Negative
Well	Replicate	Fluorophore	Sample Type	Sample Name	Target	Melt Temp 1	Peak Height 1	FW/HM Peak 1	Area Peak 1	Melt Temp 2	Peak Height 2	FW/HM Peak 2	Area Peak 2	Melt Temp 3	Peak Height 3	FW/HM Peak 3	Area Peak 3	Melt Temp 4	Peak Height 4	FW/HM Peak 4	Area Peak 4	Description
A01-Ch3		ROX	Unknown		HASTY	73.08	18.677549651003	0.428789805310965	8.52439014552717	0	0	0	0	0	0	0	0	0	0	0	0
A01-Ch5		SYBR	Unknown		HASTY	81.38	505.082659015545	1.77370565259636	953.549034917716	0	0	0	0	0	0	0	0	0	0	0	0
A02-Ch3		ROX	Unknown		HASTY	73.05	27.0312628352862	0.40292377397418	11.5927975372049	0	0	0	0	0	0	0	0	0	0	0	0
A02-Ch5		SYBR	Unknown		HASTY	81.38	468.574157363711	1.77791170846007	886.72212643195	0	0	0	0	0	0	0	0	0	0	0	0
A03-Ch3		ROX	Unknown		HASTY	85.81	21.9480512535214	0.306122021663189	7.15462866078643	0	0	0	0	0	0	0	0	0	0	0	0
A03-Ch5		SYBR	Unknown		HASTY	81.1899999999999	355.110860748401	1.71875409178881	649.645931279395	0	0	0	0	0	0	0	0	0	0	0	0
A04-Ch3		ROX	Unknown		HASTY	73.39	21.0296158833661	0.635418274800852	14.2229624663665	0	0	0	0	0	0	0	0	0	0	0	0
A04-Ch5		SYBR	Unknown		HASTY	81.3	546.613382518146	1.73928100857663	1011.92665963102	0	0	0	0	0	0	0	0	0	0	0	0
A05-Ch3		ROX	Unknown		HASTY	88.8	24.2162503401206	0.349255116856098	9.00254895587258	0	0	0	0	0	0	0	0	0	0	0	0
A05-Ch5		SYBR	Unknown		HASTY	81.2799999999999	572.624269732369	1.73115468243698	1055.12678601372	0	0	0	0	0	0	0	0	0	0	0	0
A06-Ch3		ROX	Unknown		HASTY	0	0	0	0	0	0	0	0	0	0	0	0	0	0	0	0
A06-Ch5		SYBR	Unknown		HASTY	81.2799999999999	462.982927815756	1.76239294666301	868.493846587265	0	0	0	0	0	0	0	0	0	0	0	0
A07-Ch3		ROX	Unknown		HASTY	90.85	209.28721796084	0.449361563855409	100.100823426067	0	0	0	0	0	0	0	0	0	0	0	0
A07-Ch5		SYBR	Unknown		HASTY	81.1899999999999	383.34843326864	1.7292331844744	705.580023597553	0	0	0	0	0	0	0	0	0	0	0	0
A08-Ch3		ROX	Unknown		HASTY	88.76	73.4491875557136	0.277439745855331	21.7039741681377	0	0	0	0	0	0	0	0	0	0	0	0
A08-Ch5		SYBR	Unknown		HASTY	81.38	551.100766166458	1.73366760978818	1016.94127091398	0	0	0	0	0	0	0	0	0	0	0	0
A09-Ch3		ROX	Unknown		HASTY	74.08	44.0138023590061	0.581711391185224	27.2518180076679	0	0	0	0	0	0	0	0	0	0	0	0
A09-Ch5		SYBR	Unknown		HASTY	81.24	422.079499509572	1.78286374241395	800.961118784316	0	0	0	0	0	0	0	0	0	0	0	0
A10-Ch3		ROX	Unknown		HASTY	73.14	10.4792748919154	0.577159799216688	6.43763470035526	0	0	0	0	0	0	0	0	0	0	0	0
A10-Ch5		SYBR	Unknown		HASTY	81.37	553.037230175741	1.6137324211312	949.915372396685	0	0	0	0	0	0	0	0	0	0	0	0
A11-Ch3		ROX	Unknown		HASTY	84.24	19.6583318788883	0.32769872635603	6.85708371108061	0	0	0	0	0	0	0	0	0	0	0	0
A11-Ch5		SYBR	Unknown		HASTY	81.4599999999999	574.607682937406	1.65926147569742	1014.81126902511	0	0	0	0	0	0	0	0	0	0	0	0
A12-Ch3		ROX	Unknown		HASTY	0	0	0	0	0	0	0	0	0	0	0	0	0	0	0	0
A12-Ch5		SYBR	Unknown		HASTY	81.36	509.408580644221	1.6421178659827	890.368127104141	0	0	0	0	0	0	0	0	0	0	0	0
A13-Ch3		ROX	Unknown		HASTY	76.18	16.9061779489114	0.229321386051178	4.18856937578804	0	0	0	0	0	0	0	0	0	0	0	0
