# Supplementary material for: Genome-wide identification of gene families related to miRNA biogenesis in Mangifera indica L. and their possible role during heat stress
Source: PeerJ. 2024 Jul 17;12:e17737. doi: 10.7717/peerj.17737 (PMC11260077; doi:10.7717/peerj.17737)
Supplement: Supplemental Information 23 [file peerj-12-17737-s023.xlsx]

## Sheet: General Info
General Info
Ord File Name	C:\Users\Propietario\Documents\Andrés\Corrida final tratados HASTY 13 de julio 2018.ord
Software Version	2.2.250.602
Instrument Name	PR0961400539
Instrument Serial	PR0961400539
Instrument Version	PCR 2.3.2, RT 1.1.12.23
Used Data Step	1
Sample Group	Default
Protocol Log	StartTime: 13/07/2018 04:50:48 p.m.
	RunTime: 01:20:58
	Path: /SHARED/PCPTP
	No errors

## Sheet: Plate
Well	Fluorophore	Sample Type	Target	Description	Quantity	AD Std Value	Replicate	Sample Name		Sample Group	Default
A01-Ch1	[none]	[none]			0						A1
A01-Ch2	[none]	[none]			0						A2
A01-Ch3	[none]	[none]			0						A3
A01-Ch4	[none]	[none]			0						A4
A01-Ch5	[none]	[none]			0						A5
A02-Ch1	[none]	[none]			0						A6
A02-Ch2	[none]	[none]			0						A7
A02-Ch3	[none]	[none]			0						A8
A02-Ch4	[none]	[none]			0						A9
A02-Ch5	[none]	[none]			0						A10
A03-Ch1	[none]	[none]			0						A11
A03-Ch2	[none]	[none]			0						A12
A03-Ch3	[none]	[none]			0						A13
A03-Ch4	[none]	[none]			0						A14
A03-Ch5	[none]	[none]			0						A15
A04-Ch1	[none]	[none]			0						A16
A04-Ch2	[none]	[none]			0						B1
A04-Ch3	[none]	[none]			0						B2
A04-Ch4	[none]	[none]			0						B3
A04-Ch5	[none]	[none]			0						B4
A05-Ch1	[none]	[none]			0						B5
A05-Ch2	[none]	[none]			0						B6
A05-Ch3	[none]	[none]			0						B7
A05-Ch4	[none]	[none]			0						B8
A05-Ch5	[none]	[none]			0						B9
A06-Ch1	[none]	[none]			0						B10
A06-Ch2	[none]	[none]			0						B11
A06-Ch3	[none]	[none]			0						B12
A06-Ch4	[none]	[none]			0						B13
A06-Ch5	[none]	[none]			0						B14
A07-Ch1	[none]	[none]			0						B15
A07-Ch2	[none]	[none]			0						B16
A07-Ch3	[none]	[none]			0						C1
A07-Ch4	[none]	[none]			0						C2
A07-Ch5	[none]	[none]			0						C3
A08-Ch1	[none]	[none]			0						C4
A08-Ch2	[none]	[none]			0						C5
A08-Ch3	[none]	[none]			0						C6
A08-Ch4	[none]	[none]			0						C7
A08-Ch5	[none]	[none]			0						C8
A09-Ch1	[none]	[none]			0						C9
A09-Ch2	[none]	[none]			0						C10
A09-Ch3	[none]	[none]			0						C11
A09-Ch4	[none]	[none]			0						C12
A09-Ch5	[none]	[none]			0						C13
A10-Ch1	[none]	[none]			0						C14
A10-Ch2	[none]	[none]			0						C15
A10-Ch3	[none]	[none]			0						C16
A10-Ch4	[none]	[none]			0						D1
A10-Ch5	[none]	[none]			0						D2
A11-Ch1	[none]	[none]			0						D3
A11-Ch2	[none]	[none]			0						D4
A11-Ch3	[none]	[none]			0						D5
A11-Ch4	[none]	[none]			0						D6

## Sheet: Protocol
Reaction volume	10		Channel in use:
Consumable	1		Ch 1	No
Ramp rate	7		Ch 2	No
Heated lid ON	True		Ch 3	Yes (ROX)
Heated lid temperature	105		Ch 4	No
			Ch 5	Yes (SYBR)
	No	Cycle	Type	Information
	1		Temperature	Temp.: 95°C; Time:07:00
	2		Cycle	Number of cycles to loop:40; Number of steps inside loop:2
	3	*	. Temperature	Temp.: 95°C; Time:00:05
DA	4	*	. Temperature	Temp.: 60°C; Time:00:30; Data acquisition:True
	5		Temperature	Temp.: 60°C; Time:00:30
	6		Melting Curve	Start temperature:60°C; End temperature:95°C; Hold time:00:01; Temperature increment after hold:0.2°C
	7		Temperature	Temp.: 20°C; Time:00:10

## Sheet: Acquired Data 1
Data step:	4			Show channel:	Thresholds:
Sample Group:	Default		Ch 1	No
Method:	Threshold		Ch 2	No
Smoothing:	ON		Ch 3	No
Smoothing window:	5		Ch 4	No
Baseline:	Trend		Ch 5	Yes	196.84
Baseline range start:	3
Baseline range end:	7
Channel	Cycle	Temp	A1	A2	A3	A4	A5	A6	A7	A8	A9	A10	A11	A12	A13	A14	A15	A16	B1	B2	B3	B4	B5	B6	B7	B8
5	1	60	77.39	45.61	32.28	65.73	78.07	40.35	58.28	93.15	51.16	41.51	41.4	62.61	64.48	75.59	53.18	5.36	33.32	41.22	43.4	39.25	90.89	92.5	95.28	99.33
5	2	60	42.43	18.64	12.59	31.91	41.11	19.1	37.64	49.89	23.43	22.37	25.35	34.17	34.79	42.24	27.13	-0.76	14.45	14.11	17.61	20.04	47.43	52.06	51.73	55.08
5	3	60	21.34	5	2.78	13.59	20.54	9.83	24.58	24.97	9.67	13.42	16.57	18.04	16.84	22.37	11.96	-3.15	5.6	0	2.97	9.06	22.54	27.56	25.6	28.74
5	4	60	19.79	11.55	7.2	17.42	23.46	20.66	22.23	25.96	17.32	23.49	18.7	19.99	15.42	21.57	12.38	-0.07	11.39	4.6	4.73	10.84	23.44	24.96	24.44	27.8
5	5	60	16.31	13.02	8.93	21.64	24.6	22.26	21.96	27.36	20.37	22.89	20.65	20.44	15.22	21.03	12.16	0.99	14.28	6.77	6.15	9.78	23.95	23.73	22.16	27.14
5	6	60	5.16	9.14	8.18	14.47	17.08	14.3	15.91	20.01	13.11	11.97	15.37	18.41	11.96	11.73	8.41	-0.5	13.04	4.44	2.66	6.14	18.34	17.97	13.85	19.39
5	7	60	0	4.56	2.66	6.99	7.72	6.02	12.64	12.63	6.59	6.66	8.81	11.95	7.38	3.74	3.45	-2.17	8.61	2.4	0.42	1.91	11.75	9.15	5.07	11.87
5	8	60	0.99	2.99	1.42	0	3.97	3.45	8.26	5.9	2.79	4.12	3.07	3.6	1.65	1.88	0.53	-2.58	5.29	0.94	0	0	8.53	4.55	1.19	5.03
5	9	60	3.64	2.14	1.38	0.62	2.21	2.8	6.76	3.43	2.41	5.31	2.24	0.66	2.35	2.8	1.42	-3.11	2.41	0.43	2.11	0.63	5.77	2.19	1.11	3.05
5	10	60	0.79	0	0	1.35	0	0	3.57	0	0	0	0	0	4.07	0	0	-1.86	0	1.25	2.62	0.52	0	0	0	0
5	11	60	31.82	21.41	16.78	24.96	23.14	20.36	21.23	23.84	19.07	20.41	19.81	24.41	25.92	21.16	21.75	7.85	24.08	25.76	18.22	19.08	20.46	21.79	19.69	28.64
5	12	60	61.42	46.42	36.39	49.82	53.25	45.54	40.85	50.17	42.05	45.26	45.1	51.07	49.93	47.72	45.7	18.18	52.2	53.24	40.58	41.94	49.31	50.66	45.72	60.14
5	13	60	70.34	54.2	43.22	57.43	61.55	53.98	46.63	61.43	50.21	54.99	54.39	62.07	58.48	57.17	57.06	26.21	64.39	63.78	50.88	51.38	59.88	61.03	55.58	69.95
5	14	60	47.69	37.33	27.98	37.62	39.89	34.37	31.37	42.7	33.09	33.79	38.57	43.05	40.69	39.76	40.75	29.25	45.93	46.33	38.76	41.13	41.35	42.54	37.72	48.3
5	15	60	49.25	34.96	26.06	33.13	34.73	29.54	25.89	37.53	30.73	27.74	34.25	36.57	36.52	37.62	39.12	45.46	42.83	43.46	34.52	40.86	35.71	36.99	35.25	45.97
5	16	60	47.34	30.45	20.21	28.03	30.24	25.2	21.46	30.82	27.2	24.05	29.85	30.08	32.41	35.94	33.81	73.77	38.43	42.44	32.35	41.25	31.42	30.8	28.05	39.55
5	17	60	45.05	22.01	15.49	20.28	25.32	20.49	17.53	24.87	22.17	20.28	22.39	25.75	26.41	31.77	31.06	124.77	31.47	41.61	29.78	43.74	24.3	24.24	19.24	29.72
5	18	60	34.5	11.99	6.77	9.41	13.18	13.54	10.85	14.58	9.97	10.66	14.43	16.23	16.72	24.33	25.6	202.79	21.79	33.5	23.67	41.81	14.72	13.93	6.65	16.89
5	19	60	34.95	13.61	8.96	12.6	11.21	13.36	10.96	13.36	11.11	11.05	16.93	14.63	16.58	22.94	25.6	320.03	22.83	35.87	24.85	45.09	16.73	12.76	9.06	17.04
5	20	60	32.37	13.06	7.88	11.39	7.83	10.85	8.91	12.77	9.1	11.45	18.96	11.76	14.17	22.27	22.39	462.89	23.93	38.11	26.66	44.51	17.6	11.79	9.16	15.62
5	21	60	33.46	11.01	10.14	7.87	6.39	8.35	6.14	10.85	6.91	10.35	17.35	11.43	11.26	21.1	21.88	613.2	23.62	43.31	25.02	48.21	11.97	11.45	9	15.13
5	22	60	33.23	7.74	10.12	4.86	7.26	9.68	5.21	9.09	5.54	10.51	14.78	11.89	10.41	21.61	23.47	743.39	24.5	50.4	24.49	50.31	9.95	14.46	8.14	15.83
5	23	60	31.43	10.73	9.19	4.79	4.89	8.51	2.13	5.73	5.35	9.33	13.36	10.73	7.43	19.36	21.43	841.93	22.91	54.67	26	51.59	10.05	12.48	7.91	15.08
5	24	60	30	14.93	7.37	3.31	5.29	9.16	0.53	6.76	4.35	11.14	15.78	13.68	8.88	21.54	19.81	913.5	26.32	57.32	30.83	52.08	14.35	12.66	9.01	19.1
5	25	60	29.71	16.85	6.95	2.31	5.75	10.11	0	9.33	3.39	12.93	20.18	15.66	6.82	20.55	19.89	964.63	29.9	59.79	32.75	55.85	16.56	13.25	11.05	22.87
5	26	60	31.53	23.36	9.72	5.46	9.51	10.03	4.51	13.96	6.85	20.26	25.53	19.63	9.86	22.62	23.71	1000.4	37.1	66.83	34.57	59.29	21.85	17.22	14.95	28.86
5	27	60	38.23	30.72	13	9.54	13.76	11.74	8.27	16.49	9.66	24.97	33.18	22.9	11.38	24.82	24.79	1026.46	44.42	73.25	38.57	60.74	28.3	20.46	19.24	34.93
5	28	60	42.4	35.25	18.5	11.69	17.08	14.79	9.65	18.09	8.32	27.08	35.95	27.94	13.68	25.07	22.83	1041.15	50.97	77.24	43.89	61.42	30.86	23.17	20.66	39.11
5	29	60	42.2	34.6	20.48	10.08	19.82	17.85	6.33	17.75	6.81	27.28	39.33	29.04	9.05	19.98	19.4	1046.1	51	75.2	48.58	60.49	30.44	25.45	24.02	38.95
5	30	60	36.27	30.37	15.55	7.17	13.43	12.57	0.54	11.95	2.6	24.03	33.25	25.45	0	14.29	15.74	1037.8	46.78	67.23	47.22	54.38	21.05	21.63	21.46	33.59
5	31	60	37.42	28.88	14.81	10.78	14.36	14.36	3.82	14.61	3.94	26.49	32.59	28.91	1.54	15.61	16.47	1039.57	47.15	68.91	48.94	53.08	23.49	26.66	24.34	35.52
5	32	60	43.24	34.32	22.66	17.26	22.4	22.2	9.15	23.25	9.14	30.69	36.5	34.28	7.73	19.32	21.83	1043.52	52.14	77.69	55.53	58.4	30.94	34.29	28.71	42.59
5	33	60	48.74	37.51	28.63	20.95	30.03	28.13	12.66	29.43	13.38	34.4	42.75	38.5	12.06	22.84	24.48	1046.88	56.08	81.37	59.73	61.07	36.86	38.48	36.8	45.24
5	34	60	52.47	40.1	29	23.33	33.78	30.77	11.73	31.74	18.9	34.22	43.64	39.47	13.23	23.85	25.45	1042.37	58.91	79.84	63.36	61.19	40.09	36.88	38.73	49.57
5	35	60	52.7	40.12	26	26.25	32.39	30.61	10.84	31.42	21.42	34.15	40.92	41.51	15.65	22.81	24.26	1042.02	56.78	76.74	62.54	60.25	42.69	37.89	37.38	49.17
5	36	60	58.07	42.86	29.65	33	38.03	34.48	13.07	37.38	26.75	39.03	43.03	45.2	20.18	23.08	27.77	1043.57	61.76	80.29	66.99	64.04	44.48	43.19	39.23	55.84
5	37	60	61.16	44.25	33.52	34.8	41.32	36.21	14.64	43.14	27.55	41.98	46.21	48.03	24.99	26.27	28.72	1044.64	64.82	81.79	68.11	64.94	43.37	45.33	42.13	57.48
5	38	60	59.81	42.29	34.46	32.56	43.45	36.54	13.23	45.6	28.27	41.69	46.73	47.96	29.35	25.91	29.93	1037.54	64.73	82.68	70.06	64.34	42.15	44.86	39.17	58.2
5	39	60	62.39	42.85	33.38	35.05	42.74	36.17	11.94	46.59	30.7	41.52	45.98	47.02	32.62	27.6	33.01	1036.6	63.1	83.3	70.7	64.79	41.78	44.86	38.47	58.13
5	40	60	65.79	43.18	29.04	39.19	38.29	34.01	9.28	44.32	33.11	39.99	42.84	43.99	34.14	29.3	36.53	1037.58	58.19	82.2	69.37	64.94	40.99	44.12	36.98	55.39

## Sheet: Cq Results
Data step:	4			Show channel:	Thresholds:
Sample Group:	Default		Ch 1	No
Method:	Threshold		Ch 2	No
Smoothing:	ON		Ch 3	No
Smoothing window:	5		Ch 4	No
Baseline:	Trend		Ch 5	Yes	196.84
Baseline range start:	3
Baseline range end:	7
Well	Replicate	Fluorophore	Sample Type	Sample Name	Target	Cq	Quantity	Omitted	Description
A01-Ch5		[none]	[none]			NeuN	0
A02-Ch5		[none]	[none]			NeuN	0
A03-Ch5		[none]	[none]			NeuN	0
A04-Ch5		[none]	[none]			NeuN	0
A05-Ch5		[none]	[none]			NeuN	0
A06-Ch5		[none]	[none]			NeuN	0
A07-Ch5		[none]	[none]			NeuN	0
A08-Ch5		[none]	[none]			NeuN	0
A09-Ch5		[none]	[none]			NeuN	0
A10-Ch5		[none]	[none]			NeuN	0
A11-Ch5		[none]	[none]			NeuN	0
A12-Ch5		[none]	[none]			NeuN	0
A13-Ch5		[none]	[none]			NeuN	0
A14-Ch5		[none]	[none]			NeuN	0
A15-Ch5		[none]	[none]			NeuN	0
A16-Ch5		[none]	[none]			17.92	0
B01-Ch5		[none]	[none]			NeuN	0
B02-Ch5		[none]	[none]			NeuN	0
B03-Ch5		[none]	[none]			NeuN	0
B04-Ch5		[none]	[none]			NeuN	0
B05-Ch5		[none]	[none]			NeuN	0
B06-Ch5		[none]	[none]			NeuN	0
B07-Ch5		[none]	[none]			NeuN	0
B08-Ch5		[none]	[none]			NeuN	0
B09-Ch5		[none]	[none]			NeuN	0
B10-Ch5		[none]	[none]			NeuN	0

## Sheet: Melt Curve Data
Sample Group:	Default		Show channel:
Smoothing:	ON		Ch 1	No
Smoothing window:	9		Ch 2	No
Low limit	63.5		Ch 3	Yes
High limit	91.5		Ch 4	No
Max # of peaks:	1		Ch 5	Yes
Peak threshold:	10
Slope Correction:	Yes
Derivative:	Negative
Temp	Channel	A1	A2	A3	A4	A5	A6	A7	A8	A9	A10	A11	A12	A13	A14	A15	A16	B1	B2	B3	B4	B5	B6	B7	B8	B9
60	3	26.56	28.83	16.6	19.68	19.42	12.86	31.35	67.56	0	24.22	23.54	4.24	14.16	9.42	2.69	24.74	42.02	40.05	35.58	37.78	29.51	22.27	18.29	28.79	12.99
60	5	1125.06	1000.42	767.28	1129.29	1223.03	939.07	672.02	1116.34	939.43	971.05	990.01	976.71	1032.67	915.4	868.11	1164.57	1082.46	984.65	783.56	773.03	1088.79	1077.88	1096.35	1243.47	988.33
60.2	3	26.73	28.46	16.44	18.76	19.64	13.74	30.01	69.5	0.48	23.82	25.2	2.05	11.12	7.92	2.02	25.63	40.99	40.26	34.52	37.16	27.88	21.38	18.75	28.76	11.55
60.2	5	1117.83	995.52	762.94	1121.71	1215.32	934.15	665.33	1110.43	935.66	966.12	982.41	971.44	1026.35	909.24	861.52	1153.59	1073.16	974.07	777.09	764.68	1080.09	1071.7	1090.39	1235.18	980.49
60.4	3	26.89	28.21	16.4	18.28	19.87	14.45	28.89	71.75	1.15	23.64	26.38	0.64	8.94	6.84	1.51	26.35	40.3	40.23	33.66	36.52	26.68	20.76	19.11	28.48	10.54
60.4	5	1111.6	991.55	759.51	1115.26	1208.87	930.31	659.15	1105.49	932.84	962.27	975.93	967.5	1021.3	903.97	856.18	1144.15	1065.48	964.68	771.47	757.42	1072.69	1066.83	1085.57	1228.08	974.19
60.6	3	27.04	28.06	16.5	18.23	20.1	14.99	28.01	74.3	2.01	23.71	27.07	0	7.61	6.18	1.14	26.92	39.95	39.98	32.99	35.87	25.91	20.4	19.37	27.97	9.95
60.6	5	1106.36	988.49	756.99	1109.92	1203.69	927.56	653.5	1101.52	930.97	959.51	970.58	964.9	1017.51	899.59	852.09	1136.23	1059.42	956.45	766.69	751.24	1066.58	1063.26	1081.88	1222.17	969.46
60.8	3	27.18	28.02	16.73	18.62	20.33	15.35	27.36	77.14	3.04	24.01	27.27	0.14	7.13	5.93	0.93	27.33	39.95	39.51	32.51	35.2	25.57	20.3	19.54	27.21	9.8
60.8	5	1102.11	986.34	755.39	1105.7	1199.76	925.9	648.36	1098.52	930.05	957.84	966.34	963.62	1014.97	896.12	849.25	1129.84	1054.98	949.4	762.76	746.14	1061.76	1060.99	1079.34	1217.44	966.28
61	3	27.03	28.8	18.15	20.52	20.62	15.47	27.69	80.25	3.94	25.55	26.83	2.19	8.22	7.61	1.61	28.79	40.14	38.07	32.19	34.5	25.54	21.14	19.87	25.69	10.62
61	5	1096.73	984.21	753.84	1101.67	1196.17	924.68	642.88	1094.63	929.28	956.15	962.04	962.66	1013.12	892.3	847.39	1123.31	1051.36	942.58	759.5	740.67	1056.96	1058.88	1076.56	1212.81	963.88
61.2	3	27.47	27.75	18.97	21.48	21.32	15.71	27.09	83.16	6.69	26.3	25.54	3.32	8.4	6.84	0	29.42	40.98	37.7	32.3	34.38	26.41	21.83	20.56	25.67	11.73
61.2	5	1096.74	984.49	754.41	1099.32	1195.34	925.98	639.13	1094.66	931.22	957	960.12	964.16	1012.85	891.9	846.6	1120.13	1051.27	938.5	756.75	738.05	1055.33	1059.88	1075.93	1211.77	964.75
61.4	3	27.81	28.16	17.97	21.59	21.18	15.81	27.57	87.15	7.7	26.78	24.44	4.32	9.34	6.39	0.14	28.28	40.83	37.14	31.54	33.01	26.53	22.48	20.18	25.11	11.11
61.4	5	1094.51	983.5	754.54	1097.63	1192.73	926.11	634.72	1094.2	931.89	957.23	958.42	966.54	1013.31	890.89	845.74	1117.64	1051.17	933.6	753.78	735.86	1054.57	1060.25	1075.7	1208.16	964.55
61.6	3	28.68	28.58	17.99	23.01	21.28	16.69	26.94	93.31	9.71	27.71	25.48	6.81	12.34	6.53	2.3	27.53	41.24	37.99	31.28	32.41	27.98	22.09	19.38	25.17	11.6
61.6	5	1093.4	984.58	755.36	1096.64	1192.46	926.3	632.67	1094.48	933.62	958.78	957.97	968.6	1013.22	889.85	846.7	1115.49	1050.11	930.16	752.75	734.19	1053.62	1061.48	1076.31	1207.4	966.38
61.8	3	28.52	28.95	17.06	23.43	21.91	17.42	27.25	100.58	10.95	29.94	25.31	7.34	11.93	8.07	1.59	26.67	42.49	38.41	31	31.93	29.11	23.3	18.69	26.97	13.01
61.8	5	1092.39	986.07	756.28	1094.26	1191.47	927.37	629.69	1095.72	935.67	960.69	958.44	970.47	1011.92	887	847.46	1113.29	1049.16	927.35	751.45	731.91	1051.79	1063.15	1076.73	1206.27	967.57
62	3	28.53	28.79	16.88	22.08	22	18.04	26.6	109.28	12.2	31.08	24.5	6.55	11.92	6.74	2.17	26.11	42.67	38.67	31.46	32.35	29.02	24.58	17.96	27.55	12.58
62	5	1090.24	985.36	756.3	1093.15	1191.08	930.33	627	1095.03	938.3	960.25	957.33	971.19	1011.66	886.08	848.28	1109.98	1047.63	924.46	749.7	730.64	1050.44	1062.65	1077.3	1204.55	967.5
62.2	3	29.47	28.83	17.06	21.48	22.09	20.24	26.67	119.86	11.6	33.1	24.86	7.19	12.92	6.63	2.38	29.34	42.15	38.61	32.41	32.34	29.62	23.92	19.51	28.38	13.6
62.2	5	1087.71	983.61	754.4	1091.02	1188.25	931.62	624.34	1093.26	939.16	959.36	955.35	971.64	1009.16	884.21	848.09	1103.6	1044.42	921.08	746.42	725.93	1047.26	1061.2	1074.84	1201.6	967.82
62.4	3	31.13	30.44	18.36	22.04	23.32	21.39	26.08	130.97	10.78	34.52	25.38	7.52	13.34	6.27	4.06	30.93	40.17	37.35	31.82	32.21	28.7	23.25	20.23	29.05	13.65
62.4	5	1083.5	981.33	753.99	1088.24	1185.59	931.84	621.52	1091.29	938.46	956.66	951.72	971.48	1007.31	880.4	845.76	1097.79	1040.77	915.83	743.27	721.43	1042.86	1058.46	1070.77	1198	966.3
62.6	3	32.49	31.41	18.88	23.2	23.15	22.85	26.05	145.87	10.35	35.83	24.86	8.91	14.59	6.59	4.55	32.08	40.68	36.21	32.77	31.91	29.07	23.13	20.6	28.42	14.73
62.6	5	1081.19	981.56	754.45	1087.54	1184.27	932.59	618.1	1088.88	938.05	956.15	949.62	972.67	1005.87	878.05	844.63	1092.1	1037.56	910.97	741.29	717.83	1039.21	1056.92	1069.35	1193.91	965.18
62.8	3	36.25	32.95	21.36	26.12	24.94	24.65	27.31	165.26	12.8	37.74	25.77	11.24	16.29	8.48	5.39	35.11	41.38	36.67	32.99	32.48	29.85	25.38	23.47	29.91	16.96
62.8	5	1079.82	980.91	755.89	1085.9	1181.16	933.03	615.26	1087.13	938.46	955.42	947.06	973.84	1004.47	876.88	843.08	1084.56	1035.01	907.31	738.55	714.82	1036.16	1055.56	1067.33	1188.26	965.53
63	3	37.25	35.39	22.12	28.28	26.21	25.99	28.39	188.41	14.47	39.51	27.48	12.84	18.84	9.8	7.96	34.51	43.76	37.66	33.02	33.37	31.32	26.97	25.1	31.13	18.47
63	5	1075.72	978.96	755.18	1083.48	1176.78	931.78	612	1083.98	936.84	953.96	942.46	972.93	1003	873.66	841.59	1077.25	1031.03	901.55	734.39	711.99	1031.19	1053.75	1063.75	1181.68	964.27
63.2	3	37.63	36.92	22.83	30.09	27.38	27.47	29.36	212.32	16.53	40.42	29.2	14.74	20.32	11.21	10.44	32.81	45.98	38.37	33.08	33.14	31.7	28.41	25.22	32.05	20.76
63.2	5	1071.12	975.92	753.8	1078.64	1172.2	928.87	608.2	1079.7	933.59	951.57	937.54	970.05	997.97	868.66	838.6	1068.74	1026.61	895.07	730.18	707.53	1025.53	1049.54	1059.22	1175.25	962.46
63.4	3	36.66	36.12	22.35	29.26	26.51	27.22	28.68	234.87	16.72	41.55	28.67	16.29	18.68	12.89	10.46	30.02	47.23	37.9	32.43	31.59	31.7	29.76	23.86	32.15	22.18
63.4	5	1067.14	970.7	751.97	1073.64	1166.3	924.82	602.75	1074.56	930.88	948.37	931.66	967.69	993.28	862.2	836.44	1063.08	1022.87	889.07	724.68	703.8	1019.24	1044.53	1053.75	1169.81	957.66
63.6	3	34.94	34.81	22.81	27.59	25.52	27.27	27.52	252.5	17.74	41.98	27.93	16.25	17.57	12.6	12.37	29.17	46.79	37.54	32.75	30.89	30.42	30.12	22.48	30.66	22.25
63.6	5	1065.39	968.32	751.57	1070.3	1163.39	924.81	600.81	1072.42	931.43	947.75	928.85	968.11	992.95	860.9	837.59	1059.08	1021.47	886.57	722.27	702.17	1016.68	1042.02	1052.56	1167.33	956.47
63.8	3	33.43	32.23	22.5	25.44	24.07	27.74	26.93	265.69	15.33	42.61	26.35	17.53	17.19	11.54	12.03	26.96	44.25	35.4	31.64	29.57	28.27	27.7	21.25	28.38	22.09
63.8	5	1063.68	964.8	750.69	1067.42	1159.95	923.63	598.22	1069.75	929.79	947.01	925.09	968.88	990.46	858.39	837.41	1053.05	1018.12	884.52	718.64	699.8	1013	1039.15	1050.22	1164.35	954.7
64	3	31.29	29.25	21.85	23.78	23.08	27.4	26.36	267.57	13.08	41.94	25.3	17.29	14.47	10.68	11.91	23.04	40.15	32.79	30.02	28.14	25.58	24.66	19.36	26.54	20.26
64	5	1062.39	961.95	750.59	1064.11	1157.57	922.42	596.91	1065.56	928.5	944.51	922.94	970.55	989.7	855.44	835.28	1047.48	1014.29	882.25	716.16	697.02	1010.18	1035.88	1046.94	1160.74	952.81
64.2	3	29.17	27.28	19.8	22.94	20.96	28.19	25.56	260.76	12.24	42.86	23.19	17.22	12.69	9.92	10.38	21.63	38.64	31.74	29.71	26.66	24.59	22.03	18.39	25.85	18.99
64.2	5	1062.54	960.64	749.23	1059.8	1153.5	919.59	593.43	1061.18	927.27	942.67	919.05	970.25	985.94	852.24	832.28	1041.4	1009.35	877.5	713.33	693.73	1006.58	1031.64	1043.36	1155.35	949.33

## Sheet: Melting curve Results
Sample Group:	Default		Show channel:
Smoothing:	ON		Ch 1	No
Smoothing window:	9		Ch 2	No
Low limit	63.5		Ch 3	Yes
High limit	91.5		Ch 4	No
Max # of peaks:	1		Ch 5	Yes
Peak threshold:	10
Slope Correction:	Yes
Derivative:	Negative
Well	Replicate	Fluorophore	Sample Type	Sample Name	Target	Melt Temp 1	Peak Height 1	FW/HM Peak 1	Area Peak 1	Melt Temp 2	Peak Height 2	FW/HM Peak 2	Area Peak 2	Melt Temp 3	Peak Height 3	FW/HM Peak 3	Area Peak 3	Melt Temp 4	Peak Height 4	FW/HM Peak 4	Area Peak 4	Description
A01-Ch3		[none]	[none]			65.8	15.3622299480512	0.0294375449180603	3.07244598961028	0	0	0	0	0	0	0	0	0	0	0	0
A01-Ch5		[none]	[none]			84.02	623.887755311409	1.41666498304219	940.746570944288	0	0	0	0	0	0	0	0	0	0	0	0
A02-Ch3		[none]	[none]			86.58	16.7455283807569	0.805491046463326	14.3568312480887	0	0	0	0	0	0	0	0	0	0	0	0
A02-Ch5		[none]	[none]			84.01	568.030373232909	1.3571749571525	820.552586224947	0	0	0	0	0	0	0	0	0	0	0	0
A03-Ch3		[none]	[none]			64.18	10.2747443175798	0.226760248088837	2.52125758604244	0	0	0	0	0	0	0	0	0	0	0	0
A03-Ch5		[none]	[none]			83.76	407.940210491232	1.43776620510737	624.286307457436	0	0	0	0	0	0	0	0	0	0	0	0
A04-Ch3		[none]	[none]			73.61	11.4995445465978	0.140831819057465	2.28758770280871	0	0	0	0	0	0	0	0	0	0	0	0
A04-Ch5		[none]	[none]			83.94	622.037516675989	1.42256143331663	941.860604894443	0	0	0	0	0	0	0	0	0	0	0	0
A05-Ch3		[none]	[none]			72.81	16.5748938653497	0.276033720731735	4.88033699678118	0	0	0	0	0	0	0	0	0	0	0	0
A05-Ch5		[none]	[none]			83.94	669.210954916014	1.43788477878529	1024.20325278645	0	0	0	0	0	0	0	0	0	0	0	0
A06-Ch3		[none]	[none]			70.75	52.1722616749858	0.663063977232948	36.820876369759	0	0	0	0	0	0	0	0	0	0	0	0
A06-Ch5		[none]	[none]			83.91	500.463245878997	1.4251542252203	759.1595780653	0	0	0	0	0	0	0	0	0	0	0	0
A07-Ch3		[none]	[none]			73.29	146.886899418013	0.586551891906559	91.7040521154772	0	0	0	0	0	0	0	0	0	0	0	0
A07-Ch5		[none]	[none]			83.8	406.043737590393	1.30717859610091	564.945778185897	0	0	0	0	0	0	0	0	0	0	0	0
A08-Ch3		[none]	[none]			65.03	161.957353395875	1.17884187237346	203.214759439904	0	0	0	0	0	0	0	0	0	0	0	0
A08-Ch5		[none]	[none]			83.8999999999999	581.420693351038	1.47599930902957	913.430821190635	0	0	0	0	0	0	0	0	0	0	0	0
A09-Ch3		[none]	[none]			0	0	0	0	0	0	0	0	0	0	0	0	0	0	0	0
A09-Ch5		[none]	[none]			83.77	464.319441998996	1.52988097263412	756.090070825203	0	0	0	0	0	0	0	0	0	0	0	0
A10-Ch3		[none]	[none]			69	40.1534914189955	0.916626112776809	39.17550124373	0	0	0	0	0	0	0	0	0	0	0	0
A10-Ch5		[none]	[none]			83.99	563.525102004769	1.28463031468489	770.531602057978	0	0	0	0	0	0	0	0	0	0	0	0
A11-Ch3		[none]	[none]			76.16	229.710171381845	0.532799855639041	130.269680213822	0	0	0	0	0	0	0	0	0	0	0	0
A11-Ch5		[none]	[none]			84.0699999999999	544.752896243132	1.23986241966882	718.905932232581	0	0	0	0	0	0	0	0	0	0	0	0
A12-Ch3		[none]	[none]			0	0	0	0	0	0	0	0	0	0	0	0	0	0	0	0
A12-Ch5		[none]	[none]			84.04	543.323026292356	1.38945520196319	803.529235700494	0	0	0	0	0	0	0	0	0	0	0	0
A13-Ch3		[none]	[none]			64.05	12.1817820724423	0.337831566989422	4.38036274066408	0	0	0	0	0	0	0	0	0	0	0	0
