# Supplementary material for: Genome-wide identification of gene families related to miRNA biogenesis in Mangifera indica L. and their possible role during heat stress
Source: PeerJ. 2024 Jul 17;12:e17737. doi: 10.7717/peerj.17737 (PMC11260077; doi:10.7717/peerj.17737)
Supplement: Supplemental Information 24 [file peerj-12-17737-s024.xlsx]

## Sheet: General Info
General Info
Ord File Name	C:\Users\Propietario\Documents\Andrés\Corrida final Controles AGO1 12 jul 2018.ord
Software Version	2.2.250.602
Instrument Name	PR0961400539
Instrument Serial	PR0961400539
Instrument Version	PCR 2.3.2, RT 1.1.12.23
Used Data Step	1
Sample Group	Default
Protocol Log	StartTime: 12/07/2018 05:55:48 p.m.
	RunTime: 01:22:01
	Path: /SHARED/PCPTP
	No errors

## Sheet: Plate
Well	Fluorophore	Sample Type	Target	Description	Quantity	AD Std Value	Replicate	Sample Name		Sample Group	Default
A01-Ch1	[none]	[none]			0						A1
A01-Ch2	[none]	[none]			0						A2
A01-Ch3	[none]	[none]			0						A3
A01-Ch4	[none]	[none]			0						A4
A01-Ch5	[none]	[none]			0						A5
A02-Ch1	[none]	[none]			0						A6
A02-Ch2	[none]	[none]			0						A7
A02-Ch3	[none]	[none]			0						A8
A02-Ch4	[none]	[none]			0						A9
A02-Ch5	[none]	[none]			0						A10
A03-Ch1	[none]	[none]			0						A11
A03-Ch2	[none]	[none]			0						A12
A03-Ch3	[none]	[none]			0						A13
A03-Ch4	[none]	[none]			0						A14
A03-Ch5	[none]	[none]			0						A15
A04-Ch1	[none]	[none]			0						A16
A04-Ch2	[none]	[none]			0						B1
A04-Ch3	[none]	[none]			0						B2
A04-Ch4	[none]	[none]			0						B3
A04-Ch5	[none]	[none]			0						B4
A05-Ch1	[none]	[none]			0						B5
A05-Ch2	[none]	[none]			0						B6
A05-Ch3	[none]	[none]			0						B7
A05-Ch4	[none]	[none]			0						B8
A05-Ch5	[none]	[none]			0						B9
A06-Ch1	[none]	[none]			0						B10
A06-Ch2	[none]	[none]			0						B11
A06-Ch3	[none]	[none]			0						B12
A06-Ch4	[none]	[none]			0						B13
A06-Ch5	[none]	[none]			0						B14
A07-Ch1	[none]	[none]			0						B15
A07-Ch2	[none]	[none]			0						B16
A07-Ch3	[none]	[none]			0						C1
A07-Ch4	[none]	[none]			0						C2
A07-Ch5	[none]	[none]			0						C3
A08-Ch1	[none]	[none]			0						C4
A08-Ch2	[none]	[none]			0						C5
A08-Ch3	[none]	[none]			0						C6
A08-Ch4	[none]	[none]			0						C7
A08-Ch5	[none]	[none]			0						C8
A09-Ch1	[none]	[none]			0						C9
A09-Ch2	[none]	[none]			0						C10
A09-Ch3	[none]	[none]			0						C11
A09-Ch4	[none]	[none]			0						C12
A09-Ch5	[none]	[none]			0						C13
A10-Ch1	[none]	[none]			0						C14
A10-Ch2	[none]	[none]			0						C15
A10-Ch3	[none]	[none]			0						C16
A10-Ch4	[none]	[none]			0						D1
A10-Ch5	[none]	[none]			0						D2
A11-Ch1	[none]	[none]			0						D3
A11-Ch2	[none]	[none]			0						D4
A11-Ch3	[none]	[none]			0						D5
A11-Ch4	[none]	[none]			0						D6

## Sheet: Protocol
Reaction volume	10		Channel in use:
Consumable	1		Ch 1	No
Ramp rate	7		Ch 2	No
Heated lid ON	True		Ch 3	Yes (ROX)
Heated lid temperature	105		Ch 4	No
			Ch 5	Yes (SYBR)
	No	Cycle	Type	Information
	1		Temperature	Temp.: 95°C; Time:07:00
	2		Cycle	Number of cycles to loop:40; Number of steps inside loop:2
	3	*	. Temperature	Temp.: 95°C; Time:00:05
DA	4	*	. Temperature	Temp.: 60°C; Time:00:30; Data acquisition:True
	5		Temperature	Temp.: 60°C; Time:00:30
	6		Melting Curve	Start temperature:60°C; End temperature:95°C; Hold time:00:01; Temperature increment after hold:0.2°C
	7		Temperature	Temp.: 20°C; Time:00:10

## Sheet: Acquired Data 1
Data step:	4			Show channel:	Thresholds:
Sample Group:	Default		Ch 1	No
Method:	Threshold		Ch 2	No
Smoothing:	ON		Ch 3	No
Smoothing window:	5		Ch 4	No
Baseline:	Trend		Ch 5	Yes	134.53
Baseline range start:	3
Baseline range end:	7
Channel	Cycle	Temp	A1	A2	A3	A4	A5	A6	A7	A8	A9	A10	A11	A12	A13	A14	A15	A16	B1	B2	B3	B4	B5	B6	B7	B8
5	1	60	31.85	47.47	40.7	13.28	21.52	10.84	28.9	87.36	23.65	25.01	21.28	19.1	43.23	43.7	33.97	86.22	25.92	69.07	68.58	81.27	43.39	76.44	79.36	60.43
5	2	60	47.92	54.66	44.09	34.38	40.67	26.17	42.62	108.41	38.82	39.88	40.62	28.25	48.65	49.33	40.26	82.89	38.83	74.67	72.33	77.4	58.72	75.04	79.15	73.04
5	3	60	52.69	54.88	43.54	44.93	49.58	35.49	49.4	119.25	46.9	47.07	50.31	32.19	48.66	49.83	40.28	76.24	44.64	71.75	69.73	71.04	63.21	69.37	74.93	75.35
5	4	60	45.83	48.09	38.04	41.45	48.06	39.17	48.51	119.51	47.59	46.04	49.87	29.67	43.41	44.02	32.16	65.24	43.33	57.78	59.26	63.32	54.44	59.09	66.59	64.93
5	5	60	21.34	33.56	28.31	34.33	33.2	30.39	38.98	106.71	38.29	36.33	36.32	22.82	29.31	30.31	20.02	50.83	29.72	39.74	41.39	45.41	36.3	41.89	50.38	47.05
5	6	60	8.2	22.1	23.66	27.45	24.86	22.36	33.28	94.37	30.27	29.09	24.52	16.41	15.92	18.73	11.52	36.72	20.97	26.08	28.55	30.72	23.62	30.89	33.71	31.58
5	7	60	3.64	11.39	18.9	20.5	17.74	13.61	22.87	80.8	18.52	20.5	16.72	11.59	8	5.86	4.2	18.86	11.11	18.81	16.37	15.85	12.7	18.88	17.92	18.27
5	8	60	17.05	12.99	20.05	22.27	20.92	17.91	21.55	78.3	17	24.23	19.75	12.23	12.77	11.56	9.31	14.93	16.33	19.01	20.13	19.09	16.75	17.9	19.55	20.94
5	9	60	15.73	14.4	13.07	17.97	14.41	14.39	15.68	69.87	14.02	20.62	16.77	9.15	13.74	11.52	11.84	13.64	14.1	13.23	17.68	15.78	12.97	14.22	16.2	15.44
5	10	60	0	0	0	0.13	0.15	0.26	0	53.53	1.39	5.94	3.24	0	0	0	0	1.59	0	0	6.02	0	0	0.05	0	0
5	11	60	8.75	3.04	5.57	3.48	6.78	2.4	6.84	57.79	6.42	5.73	8.28	5.99	3.85	4.45	4.11	1.61	6.79	6.7	5.49	3.3	5.73	5.83	4.42	5.06
5	12	60	17.61	9.29	12.7	8.12	11.8	5.26	9.8	62.64	7.91	11.04	11.92	9.32	7.89	11.69	8.84	1.03	14.87	10.72	8.03	10.92	14.41	8.58	11.49	11.05
5	13	60	28	21	18.7	14.52	16.4	12.91	15.58	69.47	10.26	16.67	15.84	15.33	15.8	17.97	15.01	3.28	23.75	17.12	13.09	19.5	22.58	15.22	18.37	19.42
5	14	60	17.67	11.04	11.47	4.93	6.72	4.11	4.13	59.13	0	8.14	6.03	7.8	6.73	4.85	8.41	-7.05	12.21	7.95	4.33	7	17.36	6.74	8.39	10.18
5	15	60	32.89	20.53	21.46	16.42	19.38	16.18	17.76	69.81	13	18.54	15.57	16.14	15.68	11.08	20.41	-0.2	26.39	17.36	14.58	17.23	31.58	17.89	22.44	20.41
5	16	60	38.34	22.52	26.7	20.56	22.7	21.54	20.52	73.54	20.31	23.05	20.69	17.94	19.1	17.73	26.43	3.24	32.75	23.61	21.31	21.45	40.21	20.38	30.61	21.96
5	17	60	29.34	17.62	21.45	14.25	16	18.34	16.01	66.54	15.95	17.11	15.04	16.22	13.83	19.49	22.5	-0.31	25.41	20.3	15.09	17.29	36.76	13.21	25.53	18.11
5	18	60	19.79	6.29	15.23	4.91	8.05	8.02	6.8	59.07	6.57	9.47	7.98	8.65	5.05	12.67	15.2	-8.93	17.61	13.1	7.25	7.9	31.82	7.78	15.99	11.18
5	19	60	25.39	9.87	18.66	8.08	12.23	8.63	8.6	61.47	5.74	10.11	9.88	12.86	8.9	13.97	11.88	-9.81	22.39	15.16	7.26	9.37	39.4	9.1	18.04	12.02
5	20	60	46.65	26.68	32.48	24.54	27.65	23.66	22.24	76.23	16.83	19.55	22.91	23.33	23.77	29.01	28.03	4.73	38.83	32.25	21.12	26.81	56.13	22.67	33.98	29.19
5	21	60	41.62	27.94	28.99	22.06	25.13	23.63	19.51	68.35	15.57	15.57	19.35	22.88	21.33	27	31.97	9.11	32.53	29.02	15.03	27.28	52.9	21.62	31.09	27.5
5	22	60	19.66	8.08	13.06	3.97	5.28	5.95	1.98	49.94	2.5	3.78	3.11	8.89	3.7	6.58	21.5	1.38	13.82	7.69	1.99	10.36	34.85	4.8	11.7	8.55
5	23	60	11.6	1.88	7.22	0	1.53	0	0.54	45.71	1.03	0	0	6.29	0.52	0.93	14.42	1.74	8.35	1.12	0	1.66	34.39	0	6.04	3.19
5	24	60	33.33	22.17	22.92	20.64	21.02	17.45	22.75	67.84	15.57	13.79	16.91	18.52	20.94	22.56	31.63	22.52	28.81	24.15	18.88	21.13	53.81	19.69	26.56	24.33
5	25	60	55.93	42.17	36.39	37.58	40.27	34.46	40.37	84.13	30.9	27.93	28.25	28.91	37.08	38.52	47.48	37.42	48.68	48.05	31.79	40.07	70.68	39.26	47.9	43.45
5	26	60	57.23	38.61	36.92	38.81	39.8	33.6	40.34	84.43	31.44	29.05	23.91	29.44	37.1	38.62	54.82	42.13	48.45	46.78	31.65	44.74	70.05	38.93	53.15	41.83
5	27	60	50.77	29.75	31.58	34.4	36.02	30.72	36.73	75.23	27.98	23.27	20.69	28.89	29.56	37.3	53.05	37.92	43.11	41.28	29.18	40.59	66.83	34.9	50.18	35.88
5	28	60	51.37	34.32	35.13	38.04	41.27	34.75	40.23	74.72	28.82	26.58	25.77	31.71	34.7	44.89	54.95	40.8	44.6	45.31	30.65	43.93	68.08	39.68	50.95	38.49
5	29	60	48.42	37.09	31.06	32.89	38.29	33.32	35.68	68.4	24.85	23.14	26.78	26.86	29.85	38.82	46.58	30.57	44.16	45.49	26.41	38.76	65.97	34.23	44.79	36.5
5	30	60	50.27	37.61	31.47	33.23	38.62	34.73	33.91	74.43	26.42	25.73	29.06	26.2	33.01	37.88	50	29.34	46.45	46.4	27.77	42.47	67.33	32.69	47.18	40.59
5	31	60	39.57	22.72	22.69	21.25	22.72	24.7	22.08	61.35	19.62	15.86	19.19	18.95	20.21	27.77	42.95	19.09	32.68	36.43	19.74	26.9	55.67	19.09	34.07	28.96
5	32	60	31.88	11.52	16.28	13.3	11.31	15.7	14.13	45.22	13.5	11.25	7.86	15.28	14.08	21.12	37.4	10.93	23.11	29.25	12.24	19.28	46.54	12.73	25.58	19.4
5	33	60	27	10.61	13.55	8.03	6.46	11.92	12.62	33.46	9.62	8.6	4.83	13.73	9.58	17.41	31.79	5.2	22.55	24.13	9.81	16.29	43.77	11.13	23.27	17.62
5	34	60	30.93	18.4	17.33	13.35	12.47	18.05	16.32	37.84	13.84	12.24	10.8	17.95	14.84	23.21	36.29	8.19	33.82	27.62	13.16	20.84	50.66	17.53	26.91	29.02
5	35	60	40.87	30.07	26.91	23.54	23.36	31.12	26.96	47.02	24.34	20.62	20.44	23.03	22.75	33.57	47.52	16.82	43.46	37.38	23.27	28.31	60.42	25.64	34.84	40.7
5	36	60	44.38	28.58	27.9	23.39	25.75	34.29	28.63	40.48	25.7	21.93	22.07	26.59	26.93	37.26	49.47	18.29	43.38	40.17	25.56	32.57	63.35	27.31	39.37	40.26
5	37	60	37.41	18.76	21.97	15.95	18.09	26.4	23.19	18.33	20.32	18.21	18.07	25.09	21.67	34.43	42.51	11.81	34.58	33.81	18.39	25.7	58.71	20.53	37.19	34.55
5	38	60	23.3	7.03	10.96	5.78	4.81	13.57	11.75	0	11.36	7.55	6.71	17.23	10.85	21.16	29.36	-2.16	24.25	23.48	4.88	11.8	52.04	10.68	24.28	23.75
5	39	60	19.25	5.27	11.22	4.1	0	9.89	7.65	1.63	6.93	3.95	4.06	16.7	9.33	18.73	26.08	-6.78	23.59	19.92	3.44	8.11	48.59	9.03	21.19	19.16
5	40	60	21.74	11.15	19.29	8.76	1.28	12.66	8.49	20.03	5.73	4.96	6.31	20.23	13.72	22.18	29.43	-5.93	30.1	21.39	10.38	11.64	47.65	13.36	23.85	18.16

## Sheet: Cq Results
Data step:	4			Show channel:	Thresholds:
Sample Group:	Default		Ch 1	No
Method:	Threshold		Ch 2	No
Smoothing:	ON		Ch 3	No
Smoothing window:	5		Ch 4	No
Baseline:	Trend		Ch 5	Yes	134.53
Baseline range start:	3
Baseline range end:	7
Well	Replicate	Fluorophore	Sample Type	Sample Name	Target	Cq	Quantity	Omitted	Description
A01-Ch5		[none]	[none]			NeuN	0
A02-Ch5		[none]	[none]			NeuN	0
A03-Ch5		[none]	[none]			NeuN	0
A04-Ch5		[none]	[none]			NeuN	0
A05-Ch5		[none]	[none]			NeuN	0
A06-Ch5		[none]	[none]			NeuN	0
A07-Ch5		[none]	[none]			NeuN	0
A08-Ch5		[none]	[none]			NeuN	0
A09-Ch5		[none]	[none]			NeuN	0
A10-Ch5		[none]	[none]			NeuN	0
A11-Ch5		[none]	[none]			NeuN	0
A12-Ch5		[none]	[none]			NeuN	0
A13-Ch5		[none]	[none]			NeuN	0
A14-Ch5		[none]	[none]			NeuN	0
A15-Ch5		[none]	[none]			NeuN	0
A16-Ch5		[none]	[none]			NeuN	0
B01-Ch5		[none]	[none]			NeuN	0
B02-Ch5		[none]	[none]			NeuN	0
B03-Ch5		[none]	[none]			NeuN	0
B04-Ch5		[none]	[none]			NeuN	0
B05-Ch5		[none]	[none]			NeuN	0
B06-Ch5		[none]	[none]			NeuN	0
B07-Ch5		[none]	[none]			NeuN	0
B08-Ch5		[none]	[none]			NeuN	0
B09-Ch5		[none]	[none]			NeuN	0
B10-Ch5		[none]	[none]			NeuN	0

## Sheet: Melt Curve Data
Sample Group:	Default		Show channel:
Smoothing:	ON		Ch 1	No
Smoothing window:	9		Ch 2	No
Low limit	63.5		Ch 3	Yes
High limit	91.5		Ch 4	No
Max # of peaks:	1		Ch 5	Yes
Peak threshold:	10
Slope Correction:	Yes
Derivative:	Negative
Temp	Channel	A1	A2	A3	A4	A5	A6	A7	A8	A9	A10	A11	A12	A13	A14	A15	A16	B1	B2	B3	B4	B5	B6	B7	B8	B9
60	3	57.98	47.12	16.73	36.48	45.2	38.44	45.29	20.05	30.17	38.58	32.12	13.81	16.32	21.47	16.31	44.01	40.55	29.76	24.87	33.68	43.94	28.56	31.04	27.31	31.72
60	5	1257.67	1247.55	880.45	1159.53	1216.8	1094.31	1146.78	1150.96	911.84	935.58	994.07	683.72	1096.11	1085.79	1046.42	894.79	1182.23	1261.59	1026.18	1262.56	1090.66	1138.15	1233.22	1265.65	1249.96
60.2	3	59.81	45.55	17.28	38.34	45.92	39.68	46.69	21.44	30.2	39.42	34.8	14.72	19.33	22.7	14.11	42.39	42.69	33.41	26.1	36.17	43.68	29.49	33.85	28.61	32.54
60.2	5	1264.24	1254.57	886.69	1168.02	1223.28	1101.42	1154.65	1157	919.46	942.4	1002.26	687.3	1103.32	1093.83	1052.54	899.37	1186.54	1268.74	1033.55	1268.89	1092.94	1148.11	1240.69	1272.41	1258.23
60.4	3	61.44	44.52	17.87	40.01	46.69	40.78	48.09	22.66	30.62	40.29	37.13	15.62	21.95	23.9	12.83	41.32	44.42	36.39	27.27	38.19	43.52	30.39	36.05	29.75	33.37
60.4	5	1268.78	1259.62	891.78	1174.53	1227.86	1106.86	1160.33	1160.97	925.34	947.57	1008.35	690.11	1108.82	1099.94	1057.36	902.46	1189.69	1274.06	1039.64	1273.57	1093.72	1155.67	1246.36	1277.27	1264.39
60.6	3	62.88	44.02	18.51	41.49	47.51	41.74	49.5	23.71	31.43	41.21	39.1	16.5	24.19	25.07	12.45	40.81	45.75	38.69	28.39	39.73	43.46	31.26	37.65	30.74	34.2
60.6	5	1271.28	1262.7	895.74	1179.04	1230.53	1110.64	1163.81	1162.89	929.5	951.09	1012.33	692.15	1112.61	1104.12	1060.89	904.07	1191.68	1277.57	1044.46	1276.59	1093	1160.83	1250.23	1280.23	1268.44
60.8	3	64.13	44.04	19.2	42.8	48.38	42.56	50.9	24.59	32.64	42.16	40.72	17.36	26.04	26.22	12.99	40.86	46.68	40.32	29.46	40.81	43.5	32.1	38.65	31.57	35.04
60.8	5	1271.75	1263.81	898.56	1181.55	1231.3	1112.75	1165.09	1162.76	931.93	952.97	1014.21	693.41	1114.7	1106.38	1063.12	904.2	1192.51	1279.26	1048.01	1277.96	1090.78	1163.58	1252.31	1281.29	1270.38
61	3	66.36	44.74	20.21	44.18	50.42	42.88	52.85	25.31	34.69	43.73	42.66	18.39	28.64	28.86	16.38	43.14	46.78	40.53	31.24	40.78	44.18	32.54	38.95	31.78	36.13
61	5	1277.07	1270.1	905.93	1189.2	1237.65	1119.22	1170.7	1166.87	938.13	959.34	1019.07	698.75	1121.42	1113.17	1070.41	908.89	1199.2	1286.65	1056.77	1285.17	1093.67	1170.03	1259.56	1286.67	1276.76
61.2	3	67.34	46.35	21.04	45.88	51.14	44.11	53.63	25.66	36.07	44.72	44.01	19.16	30.31	29.6	17.57	44.58	47.05	41.22	31.24	40.7	44.08	33.58	38.46	32.35	36.56
61.2	5	1271.84	1265.29	905.08	1185.34	1232.6	1116.79	1166.79	1160.75	935.61	956.07	1015.25	696.48	1118.13	1108.83	1067.72	903.44	1196.55	1284.62	1056.84	1281.38	1087.24	1167.23	1256.59	1283.73	1273.58
61.4	3	66.76	47.76	20.79	45.97	51.56	45.35	53.78	25.44	36.69	44.88	43.19	18.59	28.59	29.57	18.98	43.4	48.37	41	31.71	41.17	43.23	34.39	37.57	33.28	36.9
61.4	5	1258.29	1252.43	896.94	1174.56	1220.23	1106.43	1153.72	1146.64	926.59	945.87	1005.85	690.12	1109.02	1098.57	1059.77	893.3	1184.65	1271.37	1048.55	1267.34	1072.29	1155.96	1244.7	1271.37	1262.75
61.6	3	63.66	47.63	21.26	46.4	51.14	45.04	53.7	24.86	38.16	44.02	41.65	19.71	27.55	29.96	19.97	41.93	48.39	40.43	32.76	42.27	42.93	34.98	37.28	33.57	37.48
61.6	5	1240.63	1236.76	887.09	1160.97	1204.7	1093.21	1139.07	1132.14	916.93	933.08	993.99	682.8	1096.1	1085.65	1049.1	882.88	1169.72	1254.77	1037.75	1252.22	1055.43	1142.46	1229.45	1255.92	1246.84
61.8	3	61.25	48.66	21.02	45.71	49.55	45.47	53.84	25.76	37.19	45.05	41.57	21.28	27.64	28.64	21.62	41.04	49.75	41.59	34.05	42.38	43.52	35.63	37.38	33.71	37.61
61.8	5	1240.38	1236.71	888.96	1161.91	1205.07	1094.33	1138.16	1132.15	918.81	933.47	992.45	685.8	1097.29	1087.05	1052.06	881.17	1171.16	1254.88	1041.51	1252.48	1053.57	1145.56	1229.67	1256.06	1248.18
62	3	58.32	47.46	20.16	45.03	47.59	44.45	51.32	25.09	36.33	43.72	41.34	22.12	27.75	29.76	21.71	40.58	48.45	40.29	32.77	41.53	41.88	34.98	36.03	33.14	36.64
62	5	1240.63	1237.47	891.38	1164.11	1206.29	1095.1	1138.73	1132.52	921.4	934.91	993.55	686.69	1099.4	1089.4	1055.85	880.05	1173.97	1256.78	1044.42	1255.1	1052.75	1147.76	1230.31	1256.18	1248.44
62.2	3	58.17	47.1	20.06	44.28	45.35	45.47	50.72	24.75	35.59	41.54	40.74	22.43	28.33	30.51	20.89	38.03	48.64	42.03	32.81	39.74	40.4	33.83	35.32	31.04	35.7
62.2	5	1234.95	1232.04	888.43	1160.85	1201.02	1091.08	1136.91	1127.93	920.21	932.19	989.92	684.81	1096.9	1087.53	1055.92	876.27	1170.03	1252.94	1043.5	1250.32	1047.76	1145.87	1225.82	1251.47	1244.34
62.4	3	58.96	46.73	20.79	43.98	45.84	45.11	50.06	23.47	35.12	41.11	40.06	22.37	30.28	30.01	21.01	38.13	47.79	42.26	32.77	37.52	38.46	32.88	34.54	29.05	34.64
62.4	5	1230.55	1228.31	886.74	1158.81	1198.26	1087.86	1134.38	1124.17	919.67	929.65	985.41	682.73	1096.08	1086.68	1055.45	874.12	1165.05	1249.67	1044.17	1246.7	1042.97	1144.62	1220.29	1246.25	1241.99
62.6	3	60.39	45.79	22.45	43.37	46.21	43.77	50.75	22.51	36.22	41.36	39.44	22	30.58	29.75	22.16	38.36	46.2	41.87	32.04	36.33	38.39	33	34.58	28.6	34.26
62.6	5	1225.46	1224.36	885.1	1154.46	1192.35	1083.77	1129.12	1118.54	917.24	925.05	979.77	679.68	1092.82	1084.25	1051.9	869.06	1160.93	1244.82	1044.21	1242.64	1037.89	1141.55	1215.32	1240.51	1236.58
62.8	3	61.7	44.66	22.06	43.16	46.87	44.49	49.66	21.47	36.11	40.73	37.59	22.88	29.71	27.69	23.64	40.16	45.05	41.47	32.28	34.89	37.46	32.57	34.62	29.56	34.08
62.8	5	1218.77	1218.57	881.9	1147.84	1184.31	1078.57	1123.47	1110.9	914.58	919.1	973.99	676.7	1089.6	1079.09	1046.15	863.11	1155.22	1238.6	1042.3	1235.44	1030.83	1137.42	1209.03	1234.5	1231.33
63	3	62.78	43.92	21.87	43.21	48.34	44.92	49.87	19.99	36.56	40.85	36.62	23.17	28.23	27.36	23.16	40.13	45.68	40.29	33.32	35.21	38.03	33.71	36.41	30.33	34.63
63	5	1206.19	1206.37	874.06	1136.66	1170.18	1068.75	1109.99	1097.99	906.81	908.17	964.68	670.82	1080.57	1069.43	1036.4	854.59	1143.67	1224.79	1034.99	1221.14	1018.26	1126.96	1196.43	1222.99	1219.72
63.2	3	61.63	43.41	23.09	44.06	48.86	45.68	51.88	20.86	38.37	41.34	37.49	24.44	28.44	27.76	23.77	41.74	44.9	40.57	33.85	36.9	38.53	34.04	37.11	31.72	34.99
63.2	5	1199.84	1200.08	871.08	1130.91	1162.22	1064.22	1102.79	1092.29	902.25	900.64	960.16	668.69	1075.11	1063.47	1031.93	851.33	1137.14	1216.7	1032.51	1214.08	1011.52	1120.69	1188.99	1216.71	1211.58
63.4	3	60.82	43.3	24.14	45.72	48.03	46.55	52.97	21.9	39.27	42.23	39.29	25.8	29.41	28.25	25.5	43.96	45.27	40.86	35.13	37.85	39.61	33.81	37.76	32.23	35.46
63.4	5	1195.06	1194.06	869.02	1126.09	1156.61	1061.11	1097.27	1087.97	899.16	895.43	955.61	666.97	1070.94	1058.35	1027.71	846.87	1133.53	1211.04	1031.5	1207.7	1006.28	1117.19	1184.41	1212.24	1205.77
63.6	3	58.48	43.13	24.4	46.36	47.79	47.06	51.8	23.37	40.95	42.53	41.05	26.69	30.83	31.98	24.74	44.24	44.41	39.39	35.6	36.86	39.27	33.49	37.86	33.03	36.2
63.6	5	1183.94	1182.68	863.01	1115.43	1146.31	1052.54	1086.76	1078.33	891.94	887.4	947.12	661.77	1062.44	1049.16	1020.64	840.14	1125.34	1200.42	1024.14	1197.08	997.2	1105.9	1173.98	1202.36	1193.3
63.8	3	58.29	45.6	25.36	47.46	46.02	47.81	52.19	24.57	41.3	42.76	41.59	27.85	31.17	33.95	23.91	43.16	44.94	41.27	37.03	36.63	40.5	32.09	37.03	32.06	36.04
63.8	5	1174.96	1171.75	859.06	1106.45	1138.42	1044.61	1079.93	1070.38	886.3	882.25	938.78	657.84	1055.45	1041.57	1014.26	832.96	1116.29	1190.62	1017.75	1187.76	989.3	1097.55	1164.91	1192.22	1183.07
64	3	57.27	46.44	25.14	46.53	45.92	46.58	51.53	24.36	40.82	42.79	41.74	27.6	31.06	33.92	26.11	42.29	44.86	41.61	37.41	36.99	39.45	32.38	36.19	30.6	36.14
64	5	1168.99	1164.94	857.64	1101.26	1133.84	1039.54	1074.02	1065.64	882.88	878.27	933.6	655.08	1051.72	1037.3	1012.24	829.72	1110.38	1182.44	1013.28	1182.34	984.04	1091.71	1157.96	1186.03	1178.41
64.2	3	56.44	45.08	25.75	46.05	46	45	49.87	23.59	39.03	42.35	41.14	25.68	30.11	33.04	25.33	40.53	44.64	40.24	37.37	37.27	39.16	32.19	35.21	30.45	34.4
64.2	5	1163.2	1158.45	855.87	1094.68	1127.57	1034.05	1067.98	1060.61	879.02	873.67	927.68	652.51	1046.57	1033.12	1009.03	825.12	1104.77	1175.89	1009.11	1176.31	978.83	1087.18	1152.4	1180.46	1170.62

## Sheet: Melting curve Results
Sample Group:	Default		Show channel:
Smoothing:	ON		Ch 1	No
Smoothing window:	9		Ch 2	No
Low limit	63.5		Ch 3	Yes
High limit	91.5		Ch 4	No
Max # of peaks:	1		Ch 5	Yes
Peak threshold:	10
Slope Correction:	Yes
Derivative:	Negative
Well	Replicate	Fluorophore	Sample Type	Sample Name	Target	Melt Temp 1	Peak Height 1	FW/HM Peak 1	Area Peak 1	Melt Temp 2	Peak Height 2	FW/HM Peak 2	Area Peak 2	Melt Temp 3	Peak Height 3	FW/HM Peak 3	Area Peak 3	Melt Temp 4	Peak Height 4	FW/HM Peak 4	Area Peak 4	Description
A01-Ch3		[none]	[none]			89.46	61.9846917622976	0.369098823827505	24.3514412425675	0	0	0	0	0	0	0	0	0	0	0	0
A01-Ch5		[none]	[none]			83.2899999999999	772.53329236679	1.33120444368781	1094.61396824768	0	0	0	0	0	0	0	0	0	0	0	0
A02-Ch3		[none]	[none]			89.34	48.0281289813498	0.561376922120154	28.697842387852	0	0	0	0	0	0	0	0	0	0	0	0
A02-Ch5		[none]	[none]			83.24	762.295610841227	1.42862854910321	1159.1556770213	0	0	0	0	0	0	0	0	0	0	0	0
A03-Ch3		[none]	[none]			86.06	19.0860768469261	0.613647533562407	12.4662170405584	0	0	0	0	0	0	0	0	0	0	0	0
A03-Ch5		[none]	[none]			83.05	539.615678912851	1.34550897648702	772.805460583231	0	0	0	0	0	0	0	0	0	0	0	0
A04-Ch3		[none]	[none]			77.07	259.026400331277	0.53429590497762	147.307513407726	0	0	0	0	0	0	0	0	0	0	0	0
A04-Ch5		[none]	[none]			83.04	714.571344037404	1.30694806814943	994.037915250051	0	0	0	0	0	0	0	0	0	0	0	0
A05-Ch3		[none]	[none]			73.34	232.425018014804	0.680054677108303	168.238631820599	0	0	0	0	0	0	0	0	0	0	0	0
A05-Ch5		[none]	[none]			83.17	755.608651151953	1.34107311217231	1078.57015687157	0	0	0	0	0	0	0	0	0	0	0	0
A06-Ch3		[none]	[none]			76.33	204.670929738312	0.586998387251794	127.876898122487	0	0	0	0	0	0	0	0	0	0	0	0
A06-Ch5		[none]	[none]			83.21	674.680310476203	1.33978088932321	962.123533353836	0	0	0	0	0	0	0	0	0	0	0	0
A07-Ch3		[none]	[none]			72.79	223.380865655035	0.690911523531004	164.273469079611	0	0	0	0	0	0	0	0	0	0	0	0
A07-Ch5		[none]	[none]			83.04	720.694228660116	1.27550589748942	978.436257783698	0	0	0	0	0	0	0	0	0	0	0	0
A08-Ch3		[none]	[none]			79.73	257.99360356537	0.443469689959288	121.778856229923	0	0	0	0	0	0	0	0	0	0	0	0
A08-Ch5		[none]	[none]			83.19	687.308964158942	1.35337685805685	990.078835626129	0	0	0	0	0	0	0	0	0	0	0	0
A09-Ch3		[none]	[none]			78.13	266.250041641451	0.478918884886801	135.722130699353	0	0	0	0	0	0	0	0	0	0	0	0
A09-Ch5		[none]	[none]			83.06	551.56395037815	1.33996536924443	786.662540850917	0	0	0	0	0	0	0	0	0	0	0	0
A10-Ch3		[none]	[none]			76.58	311.314310819094	0.579843546639383	192.136084475065	0	0	0	0	0	0	0	0	0	0	0	0
A10-Ch5		[none]	[none]			83.27	568.686218855867	1.36685396531238	827.358710838096	0	0	0	0	0	0	0	0	0	0	0	0
A11-Ch3		[none]	[none]			76.78	353.917789295357	0.571806971521676	215.40256039285	0	0	0	0	0	0	0	0	0	0	0	0
A11-Ch5		[none]	[none]			83.53	589.398919852992	1.38496551901312	868.855029403695	0	0	0	0	0	0	0	0	0	0	0	0
A12-Ch3		[none]	[none]			71.01	55.9204991761038	0.674795224585757	40.164472054128	0	0	0	0	0	0	0	0	0	0	0	0
A12-Ch5		[none]	[none]			83.36	433.642919670933	1.36914370361692	631.946504643387	0	0	0	0	0	0	0	0	0	0	0	0
A13-Ch3		[none]	[none]			87.86	33.558633556517	0.433058059769869	15.4685427600059	0	0	0	0	0	0	0	0	0	0	0	0
