# Supplementary material for: Genome-wide identification of gene families related to miRNA biogenesis in Mangifera indica L. and their possible role during heat stress
Source: PeerJ. 2024 Jul 17;12:e17737. doi: 10.7717/peerj.17737 (PMC11260077; doi:10.7717/peerj.17737)
Supplement: Supplemental Information 25 [file peerj-12-17737-s025.xlsx]

## Sheet: General Info
General Info
Ord File Name	C:\Users\Propietario\Documents\Andrés\Corrida final Tratados AGO1 12 jul 2018.ord
Software Version	2.2.250.602
Instrument Name	PR0961400539
Instrument Serial	PR0961400539
Instrument Version	PCR 2.3.2, RT 1.1.12.23
Used Data Step	1
Sample Group	Default
Protocol Log	StartTime: 12/07/2018 07:36:48 p.m.
	RunTime: 01:21:27
	Path: /SHARED/PCPTP
	No errors

## Sheet: Plate
Well	Fluorophore	Sample Type	Target	Description	Quantity	AD Std Value	Replicate	Sample Name		Sample Group	Default
A01-Ch1	[none]	[none]			0						A1
A01-Ch2	[none]	[none]			0						A2
A01-Ch3	[none]	[none]			0						A3
A01-Ch4	[none]	[none]			0						A4
A01-Ch5	[none]	[none]			0						A5
A02-Ch1	[none]	[none]			0						A6
A02-Ch2	[none]	[none]			0						A7
A02-Ch3	[none]	[none]			0						A8
A02-Ch4	[none]	[none]			0						A9
A02-Ch5	[none]	[none]			0						A10
A03-Ch1	[none]	[none]			0						A11
A03-Ch2	[none]	[none]			0						A12
A03-Ch3	[none]	[none]			0						A13
A03-Ch4	[none]	[none]			0						A14
A03-Ch5	[none]	[none]			0						A15
A04-Ch1	[none]	[none]			0						A16
A04-Ch2	[none]	[none]			0						B1
A04-Ch3	[none]	[none]			0						B2
A04-Ch4	[none]	[none]			0						B3
A04-Ch5	[none]	[none]			0						B4
A05-Ch1	[none]	[none]			0						B5
A05-Ch2	[none]	[none]			0						B6
A05-Ch3	[none]	[none]			0						B7
A05-Ch4	[none]	[none]			0						B8
A05-Ch5	[none]	[none]			0						B9
A06-Ch1	[none]	[none]			0						B10
A06-Ch2	[none]	[none]			0						B11
A06-Ch3	[none]	[none]			0						B12
A06-Ch4	[none]	[none]			0						B13
A06-Ch5	[none]	[none]			0						B14
A07-Ch1	[none]	[none]			0						B15
A07-Ch2	[none]	[none]			0						B16
A07-Ch3	[none]	[none]			0						C1
A07-Ch4	[none]	[none]			0						C2
A07-Ch5	[none]	[none]			0						C3
A08-Ch1	[none]	[none]			0						C4
A08-Ch2	[none]	[none]			0						C5
A08-Ch3	[none]	[none]			0						C6
A08-Ch4	[none]	[none]			0						C7
A08-Ch5	[none]	[none]			0						C8
A09-Ch1	[none]	[none]			0						C9
A09-Ch2	[none]	[none]			0						C10
A09-Ch3	[none]	[none]			0						C11
A09-Ch4	[none]	[none]			0						C12
A09-Ch5	[none]	[none]			0						C13
A10-Ch1	[none]	[none]			0						C14
A10-Ch2	[none]	[none]			0						C15
A10-Ch3	[none]	[none]			0						C16
A10-Ch4	[none]	[none]			0						D1
A10-Ch5	[none]	[none]			0						D2
A11-Ch1	[none]	[none]			0						D3
A11-Ch2	[none]	[none]			0						D4
A11-Ch3	[none]	[none]			0						D5
A11-Ch4	[none]	[none]			0						D6

## Sheet: Protocol
Reaction volume	10		Channel in use:
Consumable	1		Ch 1	No
Ramp rate	7		Ch 2	No
Heated lid ON	True		Ch 3	Yes (ROX)
Heated lid temperature	105		Ch 4	No
			Ch 5	Yes (SYBR)
	No	Cycle	Type	Information
	1		Temperature	Temp.: 95°C; Time:07:00
	2		Cycle	Number of cycles to loop:40; Number of steps inside loop:2
	3	*	. Temperature	Temp.: 95°C; Time:00:05
DA	4	*	. Temperature	Temp.: 60°C; Time:00:30; Data acquisition:True
	5		Temperature	Temp.: 60°C; Time:00:30
	6		Melting Curve	Start temperature:60°C; End temperature:95°C; Hold time:00:01; Temperature increment after hold:0.2°C
	7		Temperature	Temp.: 20°C; Time:00:10

## Sheet: Acquired Data 1
Data step:	4			Show channel:	Thresholds:
Sample Group:	Default		Ch 1	No
Method:	Threshold		Ch 2	No
Smoothing:	ON		Ch 3	No
Smoothing window:	5		Ch 4	No
Baseline:	Trend		Ch 5	Yes	82.43
Baseline range start:	3
Baseline range end:	7
Channel	Cycle	Temp	A1	A2	A3	A4	A5	A6	A7	A8	A9	A10	A11	A12	A13	A14	A15	A16	B1	B2	B3	B4	B5	B6	B7	B8
5	1	60	60.25	53.98	53.97	66.04	-1.51	-9	46.52	-22.7	48.05	30.17	50.7	33.49	54.09	65.68	19.61	36.11	51.42	86.51	14.16	91.82	100.05	97	96.8	97.23
5	2	60	49.6	48.91	47.48	60.05	-1.93	1.15	53.34	-9.25	53.4	35.9	51.26	34.21	49.25	57.03	26.28	33.53	53.71	63.23	12.09	74.25	83.2	73.87	77.86	86.07
5	3	60	40.82	47.24	43.7	55.63	-4.24	4.62	57.69	-1.72	56.98	39.61	51.35	32.51	46.66	52.12	29.49	31.47	53.72	47.8	10.78	62.16	71	58.5	64.53	76.66
5	4	60	32.18	50.32	43.95	52.71	-9.68	-0.72	59.08	-0.42	59.4	41.53	51.5	26.78	46.93	53.03	28.62	31.15	49.44	41.22	10.45	57.09	65.25	51.74	57.84	70.27
5	5	60	32.73	57.02	47.9	55.94	-11.28	-3.72	63.07	0.37	62.24	43.7	53.52	24.44	52.88	54.77	30.73	28.78	52.26	43.95	12.98	57.66	65.21	52.71	58.71	66.34
5	6	60	37.26	60.99	52.9	62.08	-8.75	-1.1	69.77	3.82	65.85	44.77	57.1	26.95	59.21	62.79	33.88	29.95	54.74	49.09	15.33	58.45	66.24	56.02	60.64	66.72
5	7	60	38.18	62.42	51.73	59	-12.9	-0.95	66.09	0.12	62.7	41.97	54.07	23.99	58.3	60.62	34.24	26.46	52.41	51.35	12.37	55.46	63.64	55.16	58.83	65.18
5	8	60	37.16	58.36	43.23	53	-16.61	-4.18	58.41	-7.68	55.98	36.05	47.55	20.55	49.66	53.29	29.7	22.82	45.11	44.08	8.45	47.5	55.97	50.38	51.9	59.63
5	9	60	48	64.09	49.97	60.19	-10.51	-0.77	63.99	-2.49	59.85	40.92	48.26	22.98	53.44	54.63	34.62	23.02	52.31	51.09	16.21	53.7	62.09	54.97	57.1	65.7
5	10	60	55.99	65.15	57.95	64.73	-1.35	3.42	70.93	2.4	65.01	46.38	53.44	26.9	58.88	64.11	41.88	25.28	56.04	53.95	22.22	58.7	67.96	59.23	60.61	69.87
5	11	60	56.95	63.41	57.34	60.19	-0.14	2.25	65.87	4.87	62.31	46.18	53.58	25.74	55.94	63.56	39.02	23.02	56.34	52	20.66	58.19	66.52	58.59	58.8	67.82
5	12	60	54.52	56.49	48.43	53.32	-0.21	-0.18	59.31	1.02	57.93	40.17	49.96	22.3	50.76	57.9	34.74	21.73	50.77	45.42	17.6	50.88	60.64	51.64	51.22	63
5	13	60	51.43	53.17	47.45	50.59	-0.71	-2.98	54.01	-2.42	53.81	36.66	42.09	18.37	48.74	51.51	29.58	19.24	50.33	43.62	18.73	45.95	56.28	47.92	46.96	58.72
5	14	60	46.91	49.45	44.13	45.5	0.17	-5.66	50.01	-6.6	50.2	33.66	38.25	13.2	44.65	46.91	30.38	15.82	46.41	42.16	20.47	44.94	51.94	43.18	45.22	51.95
5	15	60	43.06	47.12	38.98	42.99	1.8	-4.69	44.27	-1.79	47.41	31.04	38.39	10.73	39.98	43.13	28.7	12.93	43.05	40.91	19.93	43.52	51.46	40.86	45.18	48.12
5	16	60	34.22	38.75	26.85	32.54	-1.43	-8.69	35.72	-4.48	38.07	23.83	32.55	6.6	33.13	35.02	25.46	9.39	34.49	34.19	15.74	33.11	42.48	31.68	36.68	39.55
5	17	60	31.06	33.67	25.58	31.11	1.61	-10.07	30.18	-5.24	34.27	22.75	29.07	7.05	29.51	33.3	23.9	8.62	32.76	31.02	15.42	27.98	38.08	30.8	35.09	38.49
5	18	60	22.35	24.07	17.33	20.95	-1.23	-16.21	22.04	-12.78	24.34	15.9	20.38	2.82	19.67	27.38	17.53	3.67	23.01	22.66	9.3	18.13	26.79	22.91	29.34	30.88
5	19	60	23.72	23.55	16.68	20.16	2.23	-16.13	22.52	-11.96	21.65	13.04	18.36	2.08	16.79	25.73	15.89	1.92	20.83	21.24	8.6	18.08	26.46	22.4	28.52	29.21
5	20	60	12.45	16.28	8.01	12.74	-0.7	-21.64	15.58	-18.97	12	6.24	9.91	-1.91	13.1	19.22	9.89	-1.79	15.61	11.35	5.23	10.42	16.19	11.61	19.98	18.31
5	21	60	16.62	18.05	10.49	19.67	8.69	-17.3	16.26	-17.12	17.73	11.23	16.38	1.16	19.36	23.07	14.62	0.51	18.47	13.01	10.48	17.29	18.95	12.3	22.25	23.75
5	22	60	16.41	19.59	9.95	20.04	12.79	-16.74	17.2	-17.32	22.73	12.77	17.43	2.07	19.37	21.82	14.13	0.89	19.26	16.83	13.02	17.79	21.32	12.09	21.62	25.25
5	23	60	16.28	18.65	10.16	16.33	11.24	-18.69	14.84	-19.47	19.09	10.72	14.96	-0.26	15.11	15.73	12.53	0.75	17.54	18.28	13.26	15.6	21.04	13.13	19.28	23.25
5	24	60	14.35	14.41	10.35	15.25	11.22	-20.6	14.37	-21.61	16.78	8.06	12.98	-1.8	14.08	16.17	13.41	0.64	18.08	21.11	12.67	16.32	20.85	12.26	19.63	23.46
5	25	60	24.55	17.74	18.63	24.01	17.63	-15.66	20.13	-15.33	24.29	14.81	22.83	1.8	22.7	27.56	23.42	1.14	24.01	27.17	16.94	24.53	29.76	20.69	29.49	35.15
5	26	60	19.19	9.21	11.76	18.25	14.15	-20.95	13.23	-19.61	16.83	11.22	13.67	-1.05	17.66	20.88	16.55	-2.13	16.51	17.34	11.18	16.73	21.78	14.04	20.45	27.55
5	27	60	15.65	10.6	6.78	13.23	10.36	-23.47	9.34	-19.53	10.12	10.4	12.16	-3.66	15.18	14.85	12.9	-1.67	13.17	14.3	10.09	11.07	20.48	11.57	17.5	21.55
5	28	60	23.24	19.29	12.79	20.75	18.76	-19.88	17.89	-10.98	16.91	17.28	19.34	1.77	20.74	21.97	21.44	1.01	20.94	22.04	16.43	21.07	29.5	15.83	25.23	26.34
5	29	60	45.8	43.87	37.17	45.91	37.36	-6.24	43.15	13.64	43.11	37.25	43.49	17.93	42.67	46.59	41.74	9.85	44.81	45.93	36.23	44.53	55.7	39.14	48.46	51.53
5	30	60	54.42	51.23	46.74	56.68	45.29	-1.13	49.47	22.47	53.31	40.16	50.89	25.08	50.56	55.89	47.58	12.01	54.28	54.16	40.28	52.35	60.96	47.13	52.38	59.67
5	31	60	45.28	45.99	41.74	47.12	39.3	-4.95	40.28	17.55	47.07	31.49	45.8	19.55	42.55	45.92	39.21	7.7	50.55	50.39	35.31	46.02	51.94	40.88	43.54	50.34
5	32	60	51.14	49.73	47.38	50.02	43.86	-4.71	44.63	20.21	49.89	36.07	47.92	20.86	44.44	48.39	43.44	7.15	54.91	54.81	40.6	50.71	54.71	43.88	50.09	53.15
5	33	60	32.77	31.66	32.13	30.19	32.13	-17.4	30.21	7.7	31.03	25.14	29.19	12.01	27.68	29.72	25.12	1.42	34.13	35.54	26.78	31.86	35.33	28.58	31.39	34.8
5	34	60	0	0	0	0	10.71	-33.7	0	-17.61	0	0	0	-3.36	0	0	0	-12.13	0	0	0	0	0	0	0	0
5	35	60	11.96	10.36	9.86	10.58	19.78	-26.62	7.2	-6.62	12.75	6.91	10.8	3.1	8.23	8.41	10.15	-11.36	12.61	11.22	10.77	8.97	10.43	9.16	11.12	9.97
5	36	60	39.57	38.59	32.33	36.97	41.29	-10.8	31.87	15.68	36.79	26.95	36.67	16.18	29.88	30.92	33.18	-5.51	40.56	39.64	34.41	33.74	37.9	31.71	37.2	36.2
5	37	60	12.54	15.21	10.59	12.66	28.46	-22.77	9.49	-3.33	13.86	10.74	17.19	3.67	7.8	8.64	13.07	-14.14	16.8	15.69	13.66	10.41	11.69	10.14	11.18	14.15
5	38	60	11.23	16.26	10.19	10.73	29.63	-22.29	8.7	-2.03	14.81	13.72	16.88	4.29	7.89	10.12	15.27	-12.65	13.09	17.99	13.37	11.74	11.4	11.8	10.16	16.6
5	39	60	55.26	59.23	50.86	53.68	61.18	1.38	48.25	36.42	55.5	48.76	55.21	26.53	48.53	53.02	52.04	3.13	55.62	63.87	48.91	51.03	56.97	50.99	53.25	61.42
5	40	60	150.21	148.96	137.01	145.13	125.97	50.53	132.46	116.06	141.71	120.08	136.09	73.61	133.88	141.91	128.32	36	147.33	159.38	123.93	133.84	153.69	133.09	145.16	154.56

## Sheet: Cq Results
Data step:	4			Show channel:	Thresholds:
Sample Group:	Default		Ch 1	No
Method:	Threshold		Ch 2	No
Smoothing:	ON		Ch 3	No
Smoothing window:	5		Ch 4	No
Baseline:	Trend		Ch 5	Yes	82.43
Baseline range start:	3
Baseline range end:	7
Well	Replicate	Fluorophore	Sample Type	Sample Name	Target	Cq	Quantity	Omitted	Description
A01-Ch5		[none]	[none]			39.29	0
A02-Ch5		[none]	[none]			39.26	0
A03-Ch5		[none]	[none]			39.37	0
A04-Ch5		[none]	[none]			39.31	0
A05-Ch5		[none]	[none]			39.33	0
A06-Ch5		[none]	[none]			NeuN	0
A07-Ch5		[none]	[none]			39.41	0
A08-Ch5		[none]	[none]			39.58	0
A09-Ch5		[none]	[none]			39.31	0
A10-Ch5		[none]	[none]			39.47	0
A11-Ch5		[none]	[none]			39.34	0
A12-Ch5		[none]	[none]			NeuN	0
A13-Ch5		[none]	[none]			39.4	0
A14-Ch5		[none]	[none]			39.33	0
A15-Ch5		[none]	[none]			39.4	0
A16-Ch5		[none]	[none]			NeuN	0
B01-Ch5		[none]	[none]			39.29	0
B02-Ch5		[none]	[none]			39.19	0
B03-Ch5		[none]	[none]			39.45	0
B04-Ch5		[none]	[none]			39.38	0
B05-Ch5		[none]	[none]			39.26	0
B06-Ch5		[none]	[none]			39.38	0
B07-Ch5		[none]	[none]			39.32	0
B08-Ch5		[none]	[none]			39.23	0
B09-Ch5		[none]	[none]			39.37	0
B10-Ch5		[none]	[none]			39.44	0

## Sheet: Melt Curve Data
Sample Group:	Default		Show channel:
Smoothing:	ON		Ch 1	No
Smoothing window:	9		Ch 2	No
Low limit	63.5		Ch 3	Yes
High limit	91.5		Ch 4	No
Max # of peaks:	1		Ch 5	Yes
Peak threshold:	10
Slope Correction:	Yes
Derivative:	Negative
Temp	Channel	A1	A2	A3	A4	A5	A6	A7	A8	A9	A10	A11	A12	A13	A14	A15	A16	B1	B2	B3	B4	B5	B6	B7	B8	B9
60	3	16.39	19.13	9.98	4.41	22.1	24.53	18.03	27.23	20.22	27.04	19.75	21.94	8.19	5.46	22.3	18.97	12.08	17.23	26.74	15.57	18.26	3.68	14.99	6.93	0
60	5	1284.1	1275.25	1184.42	1241.09	814.44	621.63	1165.53	1074.45	1218.53	1003.07	1112.04	539.76	1132.02	1158.94	995.83	284.88	1211.32	1379.97	985.72	1198.82	1314.75	1162.43	1246.98	1367.35	1178.77
60.2	3	16.48	18.38	9.61	4.5	22.06	23.44	18.19	27.98	21.34	27.41	20.85	21.8	6.98	4.04	20.67	17.62	13.84	17.44	23.97	14.54	18.52	2.26	13.47	7.66	0.34
60.2	5	1286.91	1279.19	1186.85	1243.92	812.14	619.54	1167.63	1074.97	1222.04	1006.21	1114.74	537.03	1133.67	1160.47	993.36	284.9	1214.05	1380.51	985.43	1200.15	1313.45	1168.72	1250.79	1368.2	1179.28
60.4	3	16.91	18.06	9.42	4.85	22	22.69	18.62	28.67	22.49	28.02	22.04	21.95	6.46	3.32	19.67	16.74	15.63	17.91	22	14.04	18.96	1.65	12.59	8.73	0.95
60.4	5	1285.82	1279.37	1186.07	1243.27	807.66	615.72	1166.69	1072.28	1221.69	1006.24	1114.1	533.03	1132.12	1159.06	988.4	283.82	1213.23	1377.47	982.28	1198.53	1309.31	1171.21	1250.82	1365.59	1177.06
60.6	3	17.69	18.19	9.44	5.45	21.94	22.29	19.32	29.29	23.66	28.87	23.32	22.38	6.63	3.31	19.3	16.34	17.44	18.63	20.85	14.07	19.56	1.87	12.33	10.12	1.8
60.6	5	1280.84	1275.78	1182.11	1239.12	801.02	610.19	1162.72	1066.38	1217.48	1003.16	1110.12	527.78	1127.38	1154.71	980.94	281.64	1208.87	1370.87	976.26	1193.96	1302.32	1169.9	1247.09	1359.5	1172.1
60.8	3	18.81	18.76	9.64	6.3	21.86	22.23	20.29	29.85	24.85	29.95	24.7	23.1	7.49	4	19.55	16.43	19.27	19.61	20.5	14.64	20.33	2.91	12.71	11.84	2.92
60.8	5	1271.96	1268.43	1174.95	1231.49	792.2	602.92	1155.71	1057.28	1209.42	996.97	1102.81	521.26	1119.45	1147.44	970.98	278.37	1200.97	1360.7	967.37	1186.45	1292.49	1164.79	1239.58	1349.94	1164.4
61	3	21.52	19.66	10.47	7.4	21.87	22.78	21.79	30.66	26.51	31.19	25.84	24.47	10.29	6.06	21.17	17.38	21.65	21.86	21.38	16.1	20.81	6.88	14.5	14.51	4.92
61	5	1257.35	1255.82	1162.29	1217.6	779.27	592.54	1143.93	1042.5	1195.21	985.69	1089.48	512.83	1105.04	1134.08	956.59	273.29	1187.09	1344.49	953.78	1173.64	1277.78	1153.25	1225.97	1333.9	1151.62
61.2	3	24.79	21.47	11.1	9.59	22.08	23.49	22.89	31.01	26.75	33.49	27.23	26.48	12.42	8.15	22.51	19.02	23.1	24.03	22.68	17.97	21.67	8.19	16.85	17.64	5.94
61.2	5	1244	1244.12	1153.94	1207.5	769.84	584.04	1135.9	1031.46	1184.33	976.93	1080.32	506.39	1096.63	1126.82	946.29	269.68	1176.57	1331.61	942.55	1164.21	1266.98	1145.63	1216.18	1323.31	1144.03
61.4	3	25.81	24.14	11.61	11.07	22.54	23.93	24.66	31.16	28.91	35.61	29.46	26.02	14.4	9.64	23.1	21.13	23.8	23.87	24.75	20.18	23.6	9.98	16.93	18.42	7.65
61.4	5	1220.91	1221.47	1134.42	1187.25	753.04	570	1116.32	1010.76	1161.8	960.03	1060.67	494.3	1078	1108.81	926.67	262.25	1155.03	1308.29	923.04	1146.31	1246.04	1126.85	1195.49	1300.37	1125.45
61.6	3	24.07	25.44	12.06	14.14	22.82	24.26	26.7	31.64	30.53	36.73	31.26	25.92	16.77	11.71	24.74	20.89	24.96	24.98	26.11	20.74	24.57	12.2	18.32	20.14	8.97
61.6	5	1197.02	1198.79	1115.04	1165.86	735.55	555.62	1095.32	990.65	1138.82	942.34	1040.66	482.3	1058.68	1090.73	905.65	254.82	1133.6	1285.23	902.93	1126.64	1222.27	1108.87	1173.59	1277.76	1106.16
61.8	3	23.19	25.97	13.39	14.9	22.48	24.11	28.8	32.49	29.91	37.96	30.69	25.49	16.57	13.48	26.52	20.36	23.78	23.88	25.28	21.78	24.13	12.54	18.51	18.88	9.65
61.8	5	1178.92	1182.5	1100.85	1149.55	722.53	544.5	1079.7	973.16	1120.92	928.54	1024.75	472.47	1044.63	1076.05	889.73	247.99	1118.02	1265.4	886.84	1111.54	1203.62	1095.44	1156.27	1260.53	1092.66
62	3	22.74	24.88	13.61	16.45	22.89	23.7	29.95	32.73	29.89	37.39	28.73	24.18	15.35	13.52	25.17	18.8	22.94	23.47	23.67	20.67	23.46	11.9	17.02	17.14	8.89
62	5	1167.18	1171.12	1090.34	1137.85	712.2	535.81	1068.07	961.28	1109.45	918.91	1012.53	465.55	1036.04	1067.08	878.63	243.73	1106.95	1251.39	875.28	1101.88	1189.28	1087.67	1144.5	1247.76	1083.78
62.2	3	23.41	24.9	14.27	17.08	22.14	24.52	30.68	34.64	30.11	37.96	28.5	23.38	16.14	14.67	25.26	19.4	24.35	24.7	22.51	22.09	24.39	12.64	16.75	17.37	9.23
62.2	5	1154.68	1158.34	1078.69	1123.91	701.72	527.17	1055.35	948.14	1096.79	907.16	999.26	457.88	1025.34	1056.56	867	238.28	1096.42	1236.35	862.48	1088.77	1172.75	1078.56	1130.34	1233.44	1072.4
62.4	3	26.57	27.72	17.13	19.47	23.64	24.97	33.62	35.69	32.27	38.83	28.91	25.1	17.25	18.56	26.6	20.6	25.26	27.29	22.13	23.94	26.35	13.92	18.61	18.98	10.43
62.4	5	1143.35	1147.07	1068.33	1111.21	693	519.04	1044.86	936.54	1085.88	897.64	988.45	450.7	1015.93	1045.86	856.29	234.72	1086.11	1222.72	851.17	1077.42	1159.39	1071.36	1117.69	1220.73	1062.22
62.6	3	29.36	29.1	19.65	20.57	23.9	25.8	34.78	36.76	33.44	40.26	30.38	27.15	20.06	20.92	28.29	20.49	26.92	29.76	23.7	26.36	27.79	16.36	20.01	20.22	12.07
62.6	5	1143.64	1147.79	1068.97	1110.94	691.04	517.38	1045.96	934.58	1085.51	895.94	987.52	448.55	1016.03	1045.93	854.78	233.84	1086.24	1221.68	849.64	1075.49	1157.54	1074.2	1115.67	1219.61	1063.85
62.8	3	32.52	30.51	22.27	22.6	24.91	27.12	36.48	37.43	34.76	42.66	32.58	28.58	23.35	23.65	30.14	22.75	28.5	31.85	25.68	27.88	29.67	17.59	22.01	22.37	13.96
62.8	5	1148.77	1152.42	1076.12	1117.95	694.16	519.51	1053.85	940.19	1090.97	901.34	993.8	450.89	1024.38	1055.91	859.6	237.11	1092.05	1227.63	853.46	1080.4	1163.12	1083.24	1121.43	1225.63	1073.52
63	3	34.49	32.71	25.31	24.81	26.48	28.26	38.63	36.98	36.87	44.92	34.41	29.18	25.94	25.16	31.55	24.17	30.42	33.78	28.52	30.39	32.02	20.57	24.12	23.32	17.97
63	5	1151.66	1154.42	1081.02	1122.88	695.22	519.42	1057.19	942.2	1092.88	905.19	997.73	451.74	1028.18	1062.09	861.31	239.07	1093.88	1230.6	854.69	1082.4	1165.24	1088.93	1124.58	1227.73	1079.73
63.2	3	33.85	33.42	26.79	27.13	27.07	27.71	40.54	36.63	37.38	47.39	35.04	28.97	27.32	26.41	32.87	23.66	33.19	36.1	31.13	31.87	33.97	23.38	27.67	26.34	20.99
63.2	5	1148.08	1150.48	1079.18	1120.23	690.73	516.44	1054.63	940.01	1087.51	902.96	995.37	448.6	1024.24	1061.04	857.57	238.6	1090.03	1225.92	850.64	1077.13	1159.71	1086.69	1119.54	1222.69	1078.42
63.4	3	36.8	34.89	27.54	26.9	27.51	27.72	41.89	37.74	37.78	48.43	33.61	29.26	27.42	26.92	33.16	24.47	34.3	35.71	31.49	32.93	33.87	25.29	30.5	26.08	23.14
63.4	5	1149.13	1150.04	1081.96	1120.93	689.15	516.26	1055.65	938.63	1087.77	904.72	994.95	448.19	1024.73	1061.22	856.65	238.6	1091.54	1224.71	849.21	1077.92	1157.54	1087.82	1118.65	1222.14	1081.72
63.6	3	37.59	34.27	26.37	26.7	27.63	27.24	42.19	38.26	37.38	47.55	32.61	28.86	27.93	26.27	32.8	23.5	34.35	35.77	30.54	32.45	33.37	25.7	30.67	26.25	24.12
63.6	5	1140.73	1142.5	1076.69	1113.43	682.34	512.4	1048.19	930.49	1080.1	899.07	987.02	443.81	1018.19	1055.03	849.32	236.22	1085.19	1215.71	843.38	1071.45	1148.68	1081.25	1109.85	1212.58	1076.97
63.8	3	37.21	35.28	25.86	26.9	27.07	27.28	42.18	38.56	36.94	47.84	32.33	28.46	27.68	25.61	31.29	24.36	36.95	35.56	30.16	33.22	34	26.38	29.75	27.37	24.69
63.8	5	1132.76	1131.81	1070.45	1105.53	675.85	507.48	1038.2	920.8	1072.64	892.56	977.7	438.81	1010.29	1046.17	841.92	233.04	1077.75	1204.3	835.54	1061.38	1138.45	1072.73	1100.12	1202.82	1068.38
64	3	37.85	36.92	26.97	26.95	27.76	28.02	43.07	39.61	37.75	48.29	32.16	29.87	27.9	26.73	31.07	24.98	36.88	34.86	29.48	32.72	33.78	26.73	28.59	28.38	23.75
64	5	1125.91	1125	1064.07	1098.06	670.7	503.59	1030.46	914.52	1066.37	887.47	970.56	435.1	1004.82	1039.63	835.97	231.97	1072.24	1196.03	829.9	1055.69	1130.94	1067.25	1092.29	1195.31	1062.04
64.2	3	37.23	35.79	27.67	27.2	27.35	28.2	41.08	40.16	38.04	49.66	31.79	30.12	28.64	26.31	30.01	24.72	35.9	35.65	29.74	32.61	32.95	27.15	26.69	28.18	24.45
64.2	5	1122.05	1120.36	1062.32	1094.01	668.12	500.74	1027.91	910.12	1062.38	883.77	966.48	433.07	1001.48	1035.93	833.37	231.33	1069.25	1191.95	826.65	1051.22	1127.88	1064.85	1089.35	1191.36	1058.72

## Sheet: Melting curve Results
Sample Group:	Default		Show channel:
Smoothing:	ON		Ch 1	No
Smoothing window:	9		Ch 2	No
Low limit	63.5		Ch 3	Yes
High limit	91.5		Ch 4	No
Max # of peaks:	1		Ch 5	Yes
Peak threshold:	10
Slope Correction:	Yes
Derivative:	Negative
Well	Replicate	Fluorophore	Sample Type	Sample Name	Target	Melt Temp 1	Peak Height 1	FW/HM Peak 1	Area Peak 1	Melt Temp 2	Peak Height 2	FW/HM Peak 2	Area Peak 2	Melt Temp 3	Peak Height 3	FW/HM Peak 3	Area Peak 3	Melt Temp 4	Peak Height 4	FW/HM Peak 4	Area Peak 4	Description
A01-Ch3		[none]	[none]			84.25	13.5080422670088	0.251588436412811	3.61727985296376	0	0	0	0	0	0	0	0	0	0	0	0
A01-Ch5		[none]	[none]			83.11	796.646779291856	1.2698943694022	1076.79349924023	0	0	0	0	0	0	0	0	0	0	0	0
A02-Ch3		[none]	[none]			81.87	20.6115103145211	0.445424400418997	9.7719859030277	0	0	0	0	0	0	0	0	0	0	0	0
A02-Ch5		[none]	[none]			83.0699999999999	766.44526697654	1.41280011430266	1152.55296087044	0	0	0	0	0	0	0	0	0	0	0	0
A03-Ch3		[none]	[none]			69.62	10.4514084095338	0.239857006931305	2.69407224257678	0	0	0	0	0	0	0	0	0	0	0	0
A03-Ch5		[none]	[none]			83.02	790.215032332591	1.28707373829042	1082.54943759479	0	0	0	0	0	0	0	0	0	0	0	0
A04-Ch3		[none]	[none]			0	0	0	0	0	0	0	0	0	0	0	0	0	0	0	0
A04-Ch5		[none]	[none]			83.04	711.259525221887	1.3675271299547	1035.29250316026	0	0	0	0	0	0	0	0	0	0	0	0
A05-Ch3		[none]	[none]			89.48	33.8608309291061	0.313877798545361	11.3096105780892	0	0	0	0	0	0	0	0	0	0	0	0
A05-Ch5		[none]	[none]			82.8100000000001	321.564806149907	1.42602424519197	488.083856179964	0	0	0	0	0	0	0	0	0	0	0	0
A06-Ch3		[none]	[none]			72.75	72.6766278576594	0.728029049964622	56.3173874568274	0	0	0	0	0	0	0	0	0	0	0	0
A06-Ch5		[none]	[none]			79.96	310.585798442573	1.60535484542646	530.703142937343	0	0	0	0	0	0	0	0	0	0	0	0
A07-Ch3		[none]	[none]			75.02	66.3047310617757	0.631945485852286	44.5987982529383	0	0	0	0	0	0	0	0	0	0	0	0
A07-Ch5		[none]	[none]			83.01	719.663011954553	1.31574784673159	1007.8615398609	0	0	0	0	0	0	0	0	0	0	0	0
A08-Ch3		[none]	[none]			76.93	161.345998662508	0.592559624920786	101.762854098658	0	0	0	0	0	0	0	0	0	0	0	0
A08-Ch5		[none]	[none]			82.99	613.222361021897	1.2773322774895	833.721290975554	0	0	0	0	0	0	0	0	0	0	0	0
A09-Ch3		[none]	[none]			75.34	123.158415111502	0.63074926035516	82.6836926753001	0	0	0	0	0	0	0	0	0	0	0	0
A09-Ch5		[none]	[none]			83.04	785.228235949332	1.32284327259385	1105.61347640259	0	0	0	0	0	0	0	0	0	0	0	0
A10-Ch3		[none]	[none]			69.9200000000001	42.9158200192718	0.934837725009956	42.7024377093076	0	0	0	0	0	0	0	0	0	0	0	0
A10-Ch5		[none]	[none]			82.98	583.965866492583	1.26225931818536	784.576093780001	0	0	0	0	0	0	0	0	0	0	0	0
A11-Ch3		[none]	[none]			89.4	29.1685661091167	0.0294375449180603	5.83371322182321	0	0	0	0	0	0	0	0	0	0	0	0
A11-Ch5		[none]	[none]			83.06	658.051553632891	1.30920586063298	916.994819749972	0	0	0	0	0	0	0	0	0	0	0	0
A12-Ch3		[none]	[none]			77.6799999999999	170.623983266414	0.556079352061451	100.989417830612	0	0	0	0	0	0	0	0	0	0	0	0
A12-Ch5		[none]	[none]			82.7500000000001	272.850479568996	1.17347353544603	340.7980050584	0	0	0	0	0	0	0	0	0	0	0	0
A13-Ch3		[none]	[none]			0	0	0	0	0	0	0	0	0	0	0	0	0	0	0	0
