# Supplementary material for: Genome-wide identification of gene families related to miRNA biogenesis in Mangifera indica L. and their possible role during heat stress
Source: PeerJ. 2024 Jul 17;12:e17737. doi: 10.7717/peerj.17737 (PMC11260077; doi:10.7717/peerj.17737)
Supplement: Supplemental Information 26 [file peerj-12-17737-s026.xlsx]

## Sheet: General Info
General Info
Ord File Name	C:\Users\Propietario\Documents\Andrés\Corrida final controles AGO4 15 jul 2018.ord
Software Version	2.2.250.602
Instrument Name	PR0961400539
Instrument Serial	PR0961400539
Instrument Version	PCR 2.3.2, RT 1.1.12.23
Used Data Step	1
Sample Group	Default
Protocol Log	StartTime: 15/07/2018 10:22:39 a.m.
	RunTime: 01:21:19
	Path: /SHARED/PCPTP
	No errors

## Sheet: Plate
Well	Fluorophore	Sample Type	Target	Description	Quantity	AD Std Value	Replicate	Sample Name		Sample Group	Default
A01-Ch1	[none]	[none]			0						A1
A01-Ch2	[none]	[none]			0						A2
A01-Ch3	ROX	Unknown	AGO4		0						A3
A01-Ch4	[none]	[none]			0						A4
A01-Ch5	SYBR	Unknown	AGO4		0						A5
A02-Ch1	[none]	[none]			0						A6
A02-Ch2	[none]	[none]			0						A7
A02-Ch3	ROX	Unknown	AGO4		0						A8
A02-Ch4	[none]	[none]			0						A9
A02-Ch5	SYBR	Unknown	AGO4		0						A10
A03-Ch1	[none]	[none]			0						A11
A03-Ch2	[none]	[none]			0						A12
A03-Ch3	ROX	Unknown	AGO4		0						A13
A03-Ch4	[none]	[none]			0						A14
A03-Ch5	SYBR	Unknown	AGO4		0						A15
A04-Ch1	[none]	[none]			0						A16
A04-Ch2	[none]	[none]			0						B1
A04-Ch3	ROX	Unknown	AGO4		0						B2
A04-Ch4	[none]	[none]			0						B3
A04-Ch5	SYBR	Unknown	AGO4		0						B4
A05-Ch1	[none]	[none]			0						B5
A05-Ch2	[none]	[none]			0						B6
A05-Ch3	ROX	Unknown	AGO4		0						B7
A05-Ch4	[none]	[none]			0						B8
A05-Ch5	SYBR	Unknown	AGO4		0						B9
A06-Ch1	[none]	[none]			0						B10
A06-Ch2	[none]	[none]			0						B11
A06-Ch3	ROX	Unknown	AGO4		0						B12
A06-Ch4	[none]	[none]			0						B13
A06-Ch5	SYBR	Unknown	AGO4		0						B14
A07-Ch1	[none]	[none]			0						B15
A07-Ch2	[none]	[none]			0						B16
A07-Ch3	ROX	Unknown	AGO4		0						C1
A07-Ch4	[none]	[none]			0						C2
A07-Ch5	SYBR	Unknown	AGO4		0						C3
A08-Ch1	[none]	[none]			0						C4
A08-Ch2	[none]	[none]			0						C5
A08-Ch3	ROX	Unknown	AGO4		0						C6
A08-Ch4	[none]	[none]			0						C7
A08-Ch5	SYBR	Unknown	AGO4		0						C8
A09-Ch1	[none]	[none]			0						C9
A09-Ch2	[none]	[none]			0						C10
A09-Ch3	ROX	Unknown	AGO4		0						C11
A09-Ch4	[none]	[none]			0						C12
A09-Ch5	SYBR	Unknown	AGO4		0						C13
A10-Ch1	[none]	[none]			0						C14
A10-Ch2	[none]	[none]			0						C15
A10-Ch3	ROX	Unknown	AGO4		0						C16
A10-Ch4	[none]	[none]			0						D1
A10-Ch5	SYBR	Unknown	AGO4		0						D2
A11-Ch1	[none]	[none]			0						D3
A11-Ch2	[none]	[none]			0						D4
A11-Ch3	ROX	Unknown	AGO4		0						D5
A11-Ch4	[none]	[none]			0						D6

## Sheet: Protocol
Reaction volume	10		Channel in use:
Consumable	1		Ch 1	No
Ramp rate	7		Ch 2	No
Heated lid ON	True		Ch 3	Yes (ROX)
Heated lid temperature	105		Ch 4	No
			Ch 5	Yes (SYBR)
	No	Cycle	Type	Information
	1		Temperature	Temp.: 95°C; Time:07:00
	2		Cycle	Number of cycles to loop:40; Number of steps inside loop:2
	3	*	. Temperature	Temp.: 95°C; Time:00:05
DA	4	*	. Temperature	Temp.: 60°C; Time:00:30; Data acquisition:True
	5		Temperature	Temp.: 60°C; Time:00:30
	6		Melting Curve	Start temperature:60°C; End temperature:95°C; Hold time:00:01; Temperature increment after hold:0.2°C
	7		Temperature	Temp.: 20°C; Time:00:10

## Sheet: Acquired Data 1
Data step:	4			Show channel:	Thresholds:
Sample Group:	Default		Ch 1	No
Method:	Threshold		Ch 2	No
Smoothing:	ON		Ch 3	No
Smoothing window:	5		Ch 4	No
Baseline:	Trend		Ch 5	Yes	220.84
Baseline range start:	3
Baseline range end:	7
Channel	Cycle	Temp	A1	A2	A3	A4	A5	A6	A7	A8	A9	A10	A11	A12	A13	A14	A15	A16	B1	B2	B3	B4	B5	B6	B7	B8
5	1	60	0.63	1.76	3.76	3.95	2.9	3.23	2.75	3.59	1.57	3.03	2.17	3.08	4.13	1.55	1.82	15.37	2.62	3.57	3.87	4.46	3.78	3.56	3.77	5.41
5	2	60	-3.92	-3.16	-3.55	-3.18	-2.57	-2.82	-2.42	-4.06	-4.39	-3.46	-3.36	-4.52	-2.74	-3.81	-3.35	9.79	-3.14	-3.15	-2.06	-3.04	-3.01	-2.17	-3.25	-2.64
5	3	60	-4.85	-4.76	-6.08	-5.8	-4.75	-5	-4.25	-6.79	-6.14	-5.64	-5.65	-7.01	-5.5	-5.63	-4.94	7.03	-5.14	-5.82	-4.74	-6	-5.6	-4.6	-5.9	-5.97
5	4	60	-0.31	-1.59	-1.65	-1.78	-1.97	-1.56	-1.28	-3.28	-1.84	-1.51	-4.3	-1.93	-2.52	-2.63	-1.35	8.23	-1.7	-2.21	-2.65	-2.54	-2.38	-2.29	-2.69	-3.11
5	5	60	2.74	1.47	1.73	1	0.36	0.6	0.7	1.31	1.2	1.9	0.61	1.11	0.69	0.87	1.79	9.48	1.24	0.52	-0.21	0.51	1.23	0.27	0.55	0.87
5	6	60	-0.83	0.17	-0.45	-1.46	-1.73	-0.98	-1.65	-0.51	0.2	-1.38	0.66	-1.34	-1.46	-0.59	-0.96	7	0.23	-1.23	-1.93	-1.13	-1.05	-1.56	-1.51	-0.95
5	7	60	-2.14	-0.47	-1.04	-2.79	-1.51	-1.9	-2.42	-1.77	-1.84	-2.49	1.14	-0.72	-2.99	-0.61	-2.46	6.77	-0.49	-1.08	-2.66	-0.71	-0.67	-1.62	-1.61	-1.17
5	8	60	7.48	8.38	6.66	6.7	7.49	6.63	6.87	9.27	7.86	6.28	7.82	9.81	6.42	7.73	6.13	15.06	6.43	7.91	6.24	7.71	7.45	6.56	7.27	7.46
5	9	60	11.1	10.69	9.43	11.94	11.25	10.48	10.24	13.41	12.22	11.44	10.92	13.41	11.94	12.63	12.1	18.31	9.44	11.49	10.88	10.52	10.52	9.89	11.09	10.28
5	10	60	5.28	3.67	3.24	5.08	5.34	5.01	4.23	5.28	7.17	5.7	5.01	5.73	6.2	6.3	5.99	11.85	4.08	5.47	5.39	4.64	3.52	5.38	5.33	3.75
5	11	60	-4.82	-6.65	-5.51	-5.63	-5.8	-4.86	-4.94	-6.24	-3.85	-3.63	-4.76	-5.71	-4.5	-4.76	-4.39	1.38	-5.16	-4.84	-4.86	-4.35	-5.57	-4.29	-3.93	-5.31
5	12	60	-4.31	-4.74	-4.23	-4.67	-5.3	-4.42	-3.52	-3.59	-3.89	-3.04	-4.24	-5.59	-4.39	-5.28	-4.77	1.5	-4.79	-4.12	-3.52	-4.62	-3.99	-4.52	-3.66	-4.02
5	13	60	-5.2	-4.15	-2.85	-2.91	-4.31	-4.35	-3.45	-3.13	-3.93	-4.3	-3.46	-4.06	-4.63	-3.38	-3.75	1.54	-3.06	-4.59	-3.05	-5.21	-3.17	-4.59	-3.83	-4.74
5	14	60	-0.99	-1.71	0.06	-0.78	0.29	-0.99	-1.19	-1.08	-1.6	-1.56	-0.82	-0.74	-1.94	0.16	-1.46	4.25	-0.48	-1.84	-0.58	-1.61	-1.31	-0.75	-0.7	-1.81
5	15	60	0.36	-1.44	0.95	0.48	0.94	0.11	-0.68	-0.85	-0.29	-1.45	-0.37	-0.16	0.63	0.11	-0.62	4.59	-0.09	-0.71	-0.15	0.71	-0.37	-0.12	-0.1	-0.63
5	16	60	0.12	-0.61	0.05	0.47	0.12	0.73	-0.27	-1.26	-0.35	-0.73	-0.17	-0.53	1	-0.16	-0.43	3.22	-1.13	-0.6	-0.15	-0.29	-0.03	-0.62	0.07	-0.15
5	17	60	-1.78	-0.64	-0.83	-1.49	-2.92	-1.79	-1.22	-2.35	-2.65	-2.4	-1.54	-2.39	-1.54	-1.72	-0.6	0.1	-1.53	-2.55	-0.98	-2.86	-1.31	-1.93	-0.91	-2.33
5	18	60	1.44	1.62	0.32	0.87	-0.55	-0.5	0.49	-0.6	-1.39	0.38	-0.61	-0.57	-0.92	-0.77	1.24	0	0.14	0.15	1.3	-0.05	-1.28	0.7	2.42	1.04
5	19	60	4.24	2.17	2.9	4.47	2.73	2.39	2.03	2.66	1.93	2.87	0.94	2.14	2.11	1.58	3.14	2.24	2.53	3.64	2.68	3.86	0.79	2.71	5.86	4.02
5	20	60	7.44	5.13	4.58	8.4	6.43	4.86	3.61	4.86	5.43	4.72	3.45	5.23	6.28	6.51	6.5	3.52	3.8	6.2	3.85	4.75	2.44	4.16	9.25	8.36
5	21	60	12.18	9.34	9.61	11.43	9.59	7.36	5.77	8.04	8.17	6.46	6.82	7.89	11.49	11.21	11.93	4.12	6.28	9.06	6.95	5.55	4.21	5.55	14.01	12.68
5	22	60	20.47	18.24	17.89	19.17	17.25	11.71	9.35	11.66	11.43	9.32	11.05	12.82	20.84	19.45	19.36	3.87	14.38	18.75	13.73	7.61	6.98	8.98	26.11	23.72
5	23	60	36.79	33.28	30.99	35.29	32.29	23.23	16.11	20.33	18.8	19.63	18.49	22.74	38.25	34.74	33.57	4.95	29.19	38.53	26.42	12.73	12.48	14.96	47.87	46.9
5	24	60	69.04	65.74	55.37	66.14	60.6	43.11	28.57	37.61	32.91	37.19	33.4	41.45	71.62	65.11	66.76	5.54	56.39	74.01	46.87	23.08	21.11	26.14	86.91	91.02
5	25	60	129.7	123.97	99.7	120.19	111.74	79.16	51.9	69.14	61.15	68	64.87	73.64	132.05	120.51	127.41	7.19	104.01	134.52	81.07	40.11	35.86	44.92	159.2	170.69
5	26	60	229.12	222.87	171.88	213.25	200.35	137.38	89.98	125.57	106.45	118.02	116.43	129.79	229.89	215.88	223.4	7.41	182.6	240.08	136.93	66.13	59.43	75.23	277.2	300.34
5	27	60	387.62	377.22	283.38	368.83	355.51	240.17	159.43	231.12	193.07	213.34	212.93	238.12	389.19	372.71	372.44	11.61	306.78	415.4	224.36	118.21	108.83	132.4	455.47	500.32
5	28	60	586.84	575.23	423.5	574.13	574.85	377.6	267.12	401.87	329.79	357.08	365.89	409.51	595.55	574.45	559.52	13.52	465.68	643.22	323.84	209.75	195	231.02	660.85	738.32
5	29	60	777.21	764.1	549.34	776.05	812.49	517.74	397.39	621.54	503.84	528.7	562.1	621.95	785.77	766.77	727.57	14.01	615.8	859.15	409.1	342.1	327.19	367.21	836.26	947.93
5	30	60	921.94	911.23	641.17	934.92	1014.63	627.87	522.97	850.47	682.38	694.47	761.09	832.83	919.64	911.93	843.99	12	726.65	1022.69	469.08	500.14	503.24	524.63	952.38	1089.66
5	31	60	1014.66	999.7	696.67	1037.94	1152.11	702.94	621.76	1038.54	829.75	819.19	922.37	1000.38	1000.35	1003.34	914.57	14.03	794.1	1122.9	507.41	648.58	685.67	668.13	1017.8	1171.97
5	32	60	1071.72	1052.29	730.64	1099.7	1237.24	748.78	686.01	1162.3	927.71	897.51	1028.31	1109.58	1054.12	1060.13	960.46	15.21	834.79	1181.89	531.23	759.4	835.4	773.17	1059.07	1223.37
5	33	60	1098.2	1077.98	745.09	1127.41	1280.05	773.93	719.07	1226.89	974.6	936.52	1082.19	1168.11	1077.7	1085.46	981.2	15.68	854.5	1211.41	542.49	822.57	925.6	830.59	1078.45	1247.71
5	34	60	1108.12	1089.35	750.3	1138.08	1295.4	782.28	732.96	1252.26	992.38	957.06	1104.82	1191.03	1085.11	1092.8	982.8	13.87	861.4	1223.62	547.37	850.02	970.19	859.15	1086	1253.88
5	35	60	1111.57	1091.57	752.27	1140.67	1299.32	786.19	738.62	1263.59	1001.2	970.65	1114.2	1199.45	1086.76	1093.05	981.24	13.75	860.73	1226.89	546.12	862.08	987.66	872.43	1084.17	1252.97
5	36	60	1115.06	1094.09	753.45	1143.65	1301.63	787.42	741.83	1269.18	1009.59	980.05	1121.95	1207.63	1089.31	1092.61	984.04	13.79	862.65	1230.77	547.34	871.89	1002.05	881.32	1085.39	1253.27
5	37	60	1125.91	1106.44	758.66	1154.42	1315.8	796.34	748.98	1282.92	1019.27	993.5	1135.75	1227.21	1096.04	1103.12	994.45	17.08	874.26	1244.79	552.89	886.36	1019.33	892.04	1093.49	1263.24
5	38	60	1139.5	1117.59	761.99	1169.4	1331.17	806.44	759.98	1301.49	1033.03	1007.05	1153	1242.51	1107.69	1118.56	1008.09	19.47	887.57	1260.18	561.03	898.12	1035.73	908.18	1107.22	1277.29
5	39	60	1148.8	1121.71	763.13	1174.23	1338.6	811.39	763.02	1308.62	1039.37	1014.63	1159.87	1250.96	1115.06	1123.26	1014.41	21	893.9	1267.73	563.94	904.33	1043.08	913.02	1114.02	1284.72
5	40	60	1156.87	1121.66	763.27	1173.59	1342.2	814.25	761.8	1310.13	1042.59	1019.26	1160.88	1254.24	1121.74	1122.96	1017.79	22.06	896.23	1271.22	563.99	906.8	1044.26	911.6	1118.25	1289.71

## Sheet: Cq Results
Data step:	4			Show channel:	Thresholds:
Sample Group:	Default		Ch 1	No
Method:	Threshold		Ch 2	No
Smoothing:	ON		Ch 3	No
Smoothing window:	5		Ch 4	No
Baseline:	Trend		Ch 5	Yes	220.84
Baseline range start:	3
Baseline range end:	7
Well	Replicate	Fluorophore	Sample Type	Sample Name	Target	Cq	Quantity	Omitted	Description
A01-Ch5		SYBR	Unknown		AGO4	25.92	NeuN
A02-Ch5		SYBR	Unknown		AGO4	25.98	NeuN
A03-Ch5		SYBR	Unknown		AGO4	26.44	NeuN
A04-Ch5		SYBR	Unknown		AGO4	26.05	NeuN
A05-Ch5		SYBR	Unknown		AGO4	26.13	NeuN
A06-Ch5		SYBR	Unknown		AGO4	26.81	NeuN
A07-Ch5		SYBR	Unknown		AGO4	27.57	NeuN
A08-Ch5		SYBR	Unknown		AGO4	26.9	NeuN
A09-Ch5		SYBR	Unknown		AGO4	27.2	NeuN
A10-Ch5		SYBR	Unknown		AGO4	27.05	NeuN
A11-Ch5		SYBR	Unknown		AGO4	27.05	NeuN
A12-Ch5		SYBR	Unknown		AGO4	26.84	NeuN
A13-Ch5		SYBR	Unknown		AGO4	25.91	NeuN
A14-Ch5		SYBR	Unknown		AGO4	26.03	NeuN
A15-Ch5		SYBR	Unknown		AGO4	25.97	NeuN
A16-Ch5		SYBR	NTC		AGO4	NeuN	0
B01-Ch5		SYBR	Unknown		AGO4	26.31	NeuN
B02-Ch5		SYBR	Unknown		AGO4	25.82	NeuN
B03-Ch5		SYBR	Unknown		AGO4	26.96	NeuN
B04-Ch5		SYBR	Unknown		AGO4	28.08	NeuN
B05-Ch5		SYBR	Unknown		AGO4	28.2	NeuN
B06-Ch5		SYBR	Unknown		AGO4	27.9	NeuN
B07-Ch5		SYBR	Unknown		AGO4	25.52	NeuN
B08-Ch5		SYBR	Unknown		AGO4	25.39	NeuN
B09-Ch5		SYBR	Unknown		AGO4	25.6	NeuN
B10-Ch5		SYBR	Unknown		AGO4	26.74	NeuN

## Sheet: Melt Curve Data
Sample Group:	Default		Show channel:
Smoothing:	ON		Ch 1	No
Smoothing window:	9		Ch 2	No
Low limit	63.5		Ch 3	Yes
High limit	91.5		Ch 4	No
Max # of peaks:	1		Ch 5	Yes
Peak threshold:	10
Slope Correction:	Yes
Derivative:	Negative
Temp	Channel	A1	A2	A3	A4	A5	A6	A7	A8	A9	A10	A11	A12	A13	A14	A15	A16	B1	B2	B3	B4	B5	B6	B7	B8	B9
60	3	36.84	42.74	40.6	26.83	37.8	82.85	30.52	41.52	37.72	26.21	38.88	35.52	29.53	35.29	21.7	35.94	42.06	41.83	44.08	39.44	42.85	40.37	26.53	28.42	25.64
60	5	1182.34	1158.07	790.92	1202.53	1376.87	827.38	766.17	1352.14	1075.22	1051.84	1201.38	1291.11	1157.7	1152.46	1040.21	57.57	919.03	1312.93	596.26	919.08	1063.98	935.68	1142.81	1322.02	1029.32
60.2	3	38.25	41.96	39.24	25.86	38.26	81.38	30.56	39.58	36.83	26.65	39.49	33.84	27.69	34.66	19.5	33.33	41.46	41.12	43.3	38.08	41.12	38.23	25.89	28.8	25.09
60.2	5	1165.67	1142.24	779.23	1188.02	1359.18	814.02	753.55	1333.36	1062.6	1038.6	1186.82	1277.1	1143.63	1139.57	1030.2	56.51	903.18	1291.84	586.95	903.61	1045.57	921.53	1129.37	1305.14	1017.2
60.4	3	39.17	41.37	38.05	25.16	38.63	80.95	30.39	37.91	36.17	27.08	39.93	32.57	26.35	34.28	17.95	31.19	40.95	40.63	42.54	37.04	39.65	36.48	25.51	29.09	24.76
60.4	5	1152.64	1129.52	769.94	1176.69	1345.42	803	743.16	1318.43	1053.26	1028.46	1175.27	1265.76	1132.8	1129.73	1022.91	55.64	890.35	1275.14	579.48	890.99	1030.82	910.19	1119.22	1292.02	1007.81
60.6	3	39.6	40.97	37.03	24.74	38.9	81.57	30.01	36.5	35.74	27.52	40.17	31.71	25.51	34.15	17.05	29.53	40.51	40.34	41.8	36.33	38.43	35.11	25.38	29.3	24.63
60.6	5	1143.23	1119.91	763.06	1168.54	1335.61	794.3	734.98	1307.35	1047.2	1021.43	1166.75	1257.09	1125.21	1122.94	1018.34	54.95	880.54	1262.84	573.85	881.21	1019.72	901.66	1112.36	1282.63	1001.16
60.8	3	39.54	40.74	36.17	24.59	39.07	83.23	29.42	35.37	35.54	27.96	40.23	31.25	25.16	34.29	16.8	28.35	40.16	40.26	41.08	35.94	37.47	34.12	25.49	29.42	24.72
60.8	5	1137.46	1113.43	758.59	1163.55	1329.73	787.93	729.03	1300.13	1044.42	1017.49	1161.24	1251.1	1120.86	1119.2	1016.5	54.45	873.75	1254.93	570.07	874.28	1012.29	895.94	1108.79	1276.99	997.23
61	3	38.35	41.06	34.7	24.01	38.87	85.53	27.75	34.19	34.53	27.94	39.35	31.04	25.31	34.41	18.27	26.84	39.82	40.5	40.71	35.24	37.08	33.3	25.75	29.87	24.12
61	5	1132.69	1107.09	753.98	1158.77	1325.69	782.74	723.62	1293.74	1043.21	1013.59	1156.78	1244.51	1117.5	1116.93	1015.7	53.2	868.33	1249.73	567.07	868.35	1007.33	891.76	1106.21	1272.37	994.36
61.2	3	36.91	41.7	34.06	24.49	39.63	89.61	27.46	33.31	35.29	28.36	39.59	30.86	25.3	35.31	18.57	26.41	38.99	41.05	39.76	36.5	36.15	33.06	25.7	30.2	24.86
61.2	5	1138.6	1111.19	758.22	1165.21	1332.94	783.34	725.1	1299	1049.47	1020.47	1161.75	1247.61	1123.39	1123.16	1023.12	53.42	870.62	1254.87	569.51	870.28	1011.23	894.5	1113.77	1278.68	999.56
61.4	3	36.68	41.41	34.17	25.08	38.87	93.61	26.65	33.5	36.54	29.57	39.31	31.22	26.82	34.69	18.36	27.37	39.03	41.17	39.87	37.13	36.7	33.86	26.97	29.78	26.18
61.4	5	1141.29	1113.15	761.23	1167.53	1336.31	783.93	725.09	1302.18	1055.42	1025.47	1163.98	1249.75	1127.45	1127.64	1029	54.53	871.41	1257.87	571.21	870.77	1012.62	895.16	1118.26	1283.66	1003.36
61.6	3	35.77	41.82	36.16	26.9	38.35	99.99	26.52	36	39.38	31.09	38.48	31.82	28.93	36.05	18.91	27.61	40.19	41.33	40.12	36.99	37.63	34.92	28.53	30.3	29.21
61.6	5	1147.17	1118.19	764.65	1172.42	1340.96	783.89	726.42	1307.31	1061.94	1031.21	1167.61	1254.04	1132.99	1132.41	1034.34	56.07	871.84	1262.09	572.91	872.51	1013.81	896.2	1123.61	1287.7	1007.47
61.8	3	36.5	43.92	37.68	28.56	37.43	106.69	26.33	35.97	41.78	31.15	38.48	33.29	30.14	38.16	20.53	29.49	40.52	41.44	39.96	36.61	36.77	33.74	30.01	30.16	30.07
61.8	5	1144.41	1115.66	763.36	1170.6	1334.85	778.34	721.43	1303.31	1061.2	1029.87	1162.25	1249.49	1131	1129.3	1032.11	56.15	868.01	1257.67	569.09	868.29	1008.42	891.94	1121.75	1284.27	1006.1
62	3	37.3	44.21	38.67	28.87	38.23	114.35	26.79	36	42.93	31.96	39.08	32.24	29.96	38.57	23.16	32.63	39.5	42.09	39.49	35.76	36.88	32.89	30.22	29.72	31.18
62	5	1135.43	1106.97	758.14	1162.9	1322.22	770.41	712.09	1292.54	1055.03	1023.76	1151.57	1238.32	1122.79	1120.63	1025.81	55.01	859.4	1246.96	563.49	859.96	997.45	883.46	1114.7	1274.48	999.39
62.2	3	39.68	44.68	38.75	29.12	39.11	122.45	28.35	35.87	44.8	31.54	39.17	31.13	30.59	39.31	23.68	34.95	38.59	42.99	39.62	34.11	36.02	32.8	29.81	30.5	30.56
62.2	5	1122.7	1093.48	748.45	1148.55	1304.6	759.25	700.82	1275.46	1042.48	1012.48	1135.12	1224.86	1110.14	1106.83	1015.88	53.14	846.35	1228.68	554.92	847.24	982.14	871.29	1103.15	1259.51	989.21
62.4	3	41.47	44.56	37.08	28.02	38.99	131.77	26.41	36.44	45.74	30.68	39.49	30.14	30.84	37.68	22.84	33.4	36.85	43.92	39.53	31.74	34.93	32.11	29.15	29.73	29.41
62.4	5	1102.71	1074.02	733.86	1127.77	1281.3	744.1	685.23	1252.51	1024.42	993.92	1113	1203.15	1090.69	1085.22	997.68	49.29	828.09	1205.52	543.39	829.24	962.27	854.15	1084.62	1237.05	972.51
62.6	3	43.72	43.93	36.98	29.78	39.92	146.1	25.92	37.38	46.5	30.58	41.01	31.61	32.08	38.01	24.36	33.61	36.32	44.48	39.23	32.05	34.83	31.45	30.23	29.25	30.01
62.6	5	1091.69	1060.89	724.76	1116.46	1267.02	735.22	675.59	1237.21	1015.52	982.18	1098.64	1188.69	1078.65	1070.12	986.42	46.5	817.73	1192.97	535.71	818.77	950.4	843.58	1073.91	1224.32	962.3
62.8	3	45.25	44.13	37.56	31.15	41.79	163.13	26.27	38.44	48.41	31.83	43.51	32.65	32.06	39.16	25.25	33.82	35.65	45.08	38.94	34.33	36.31	32.39	32.03	29.83	31.12
62.8	5	1087.51	1055.01	723.28	1111.93	1261.73	730.56	671.21	1230.5	1012.96	978.91	1093.08	1181.83	1074.68	1065.37	982.8	44.93	811.84	1187.34	533.18	813.59	944.81	838.04	1070.32	1219.1	959.34
63	3	46.66	43.78	37.97	32.71	42.29	181.54	26.13	39.27	49.91	32.92	44.26	33.49	32.51	39.08	24.96	32.75	36.81	44.03	39.18	35.34	38.03	32.98	34.8	30.57	31.62
63	5	1083.86	1050.05	722.2	1109.6	1258.34	728.76	668.05	1226.29	1012.09	976.47	1089.05	1178.1	1073.96	1063.32	982.65	45.02	807.76	1184.67	532.05	810.4	941	833.29	1067.45	1216.4	957.64
63.2	3	46.47	43.43	38.1	34.01	42.21	203.93	25.1	40.24	51.5	34.34	44.03	33.43	33.47	39.19	25.37	31.92	37.86	44.3	38.77	35.88	39.35	34.2	35.36	33.45	33.33
63.2	5	1090.16	1054.45	726.57	1116.36	1263.33	731.6	670.35	1231.85	1019.16	979.81	1094.09	1183.08	1079.74	1069.12	988.89	46.95	809.53	1190.13	534.84	811.98	943.52	836.16	1073.11	1220.94	962.43
63.4	3	46.19	43.39	37.45	35.5	40.96	225.25	25.5	38.67	50.98	34.55	43.47	33.94	34.06	39.18	26.77	32.39	38.82	44.39	38.89	35.65	39.2	33.45	36.41	34.43	32.24
63.4	5	1092.76	1056.9	728.86	1120.56	1266.69	733.71	671.33	1234.9	1025.09	982.94	1096.53	1187.3	1084.75	1074.15	995.68	49.24	812.07	1194.6	536.18	814.26	946.05	838.56	1078.3	1224.82	967.47
63.6	3	45.84	43.08	37.32	35.58	40.31	244.26	25.81	36.75	50.11	33.34	42	30.68	32.7	38.96	29.03	32.28	38.42	44.02	38.63	34.84	37.82	33.39	35.26	33.87	33.02
63.6	5	1094.07	1057.66	729.62	1122.01	1265.1	732.95	670.46	1234.33	1028.47	983.91	1095.77	1186.58	1086.1	1075.47	998.59	50.34	812.54	1196.2	536.45	814.38	945.75	839.34	1080.41	1225.49	969.36
63.8	3	43.2	40.85	37.57	33.21	39.08	258.67	26.02	33.93	49.91	30.69	39.4	29.04	31.9	37.46	28.15	30.18	37.05	43.59	38.55	32.52	35.6	32.72	32.56	33.29	31.7
63.8	5	1092.93	1054.2	726.4	1118.92	1259.01	728.8	666.49	1229.84	1027.15	981.24	1091.74	1182.54	1083.22	1072.16	998.03	50.75	809.32	1191.32	534.22	810.01	940.59	836.71	1077.67	1221.44	968.14
64	3	40.45	39.33	37.17	31.6	38.54	268.27	24.69	32.11	49.3	29.57	38.51	27.88	30.43	35.63	27.13	29.29	36.98	42.9	38.98	30.63	34.8	31.37	31.37	31.64	31.48
64	5	1090.4	1051.84	723.55	1116.46	1253.75	725.74	663.43	1226.03	1026.92	978.77	1087.77	1178.19	1079.67	1069.55	996.7	50.8	807.38	1188.32	533.21	806.73	938.24	833.75	1076.04	1217.08	968.22
64.2	3	41.06	40.25	38.52	32.89	38.81	272.48	25.27	33.28	49.62	29.43	38.97	27.92	31.65	35.75	28.3	29	36.15	41.65	39.26	30.48	34.71	30.63	31.19	30.95	32.47
64.2	5	1088.3	1050.13	721.54	1115.29	1249.67	723.34	660.88	1221.63	1027.03	976.34	1086.01	1175.23	1076.76	1066.59	996.31	51.04	805.71	1185.35	531.8	804.92	936.35	831.39	1073.49	1213.72	967.32

## Sheet: Melting curve Results
Sample Group:	Default		Show channel:
Smoothing:	ON		Ch 1	No
Smoothing window:	9		Ch 2	No
Low limit	63.5		Ch 3	Yes
High limit	91.5		Ch 4	No
Max # of peaks:	1		Ch 5	Yes
Peak threshold:	10
Slope Correction:	Yes
Derivative:	Negative
Well	Replicate	Fluorophore	Sample Type	Sample Name	Target	Melt Temp 1	Peak Height 1	FW/HM Peak 1	Area Peak 1	Melt Temp 2	Peak Height 2	FW/HM Peak 2	Area Peak 2	Melt Temp 3	Peak Height 3	FW/HM Peak 3	Area Peak 3	Melt Temp 4	Peak Height 4	FW/HM Peak 4	Area Peak 4	Description
A01-Ch3		ROX	Unknown		AGO4	78.47	25.4082029891569	0.510154116551578	13.7966729187571	0	0	0	0	0	0	0	0	0	0	0	0
A01-Ch5		SYBR	Unknown		AGO4	81.16	575.447134847276	1.732533533143	1061.17278602479	0	0	0	0	0	0	0	0	0	0	0	0
A02-Ch3		ROX	Unknown		AGO4	90.2	51.0084747524849	0.0294375449180603	10.2016949504971	0	0	0	0	0	0	0	0	0	0	0	0
A02-Ch5		SYBR	Unknown		AGO4	81.1100000000001	576.326959907056	1.70677311381635	1046.99293597588	0	0	0	0	0	0	0	0	0	0	0	0
A03-Ch3		ROX	Unknown		AGO4	86.8	41.6958580298385	0.30587067142725	13.5812685268818	0	0	0	0	0	0	0	0	0	0	0	0
A03-Ch5		SYBR	Unknown		AGO4	80.85	449.311415699393	1.44933749951064	693.132088114863	0	0	0	0	0	0	0	0	0	0	0	0
A04-Ch3		ROX	Unknown		AGO4	90.54	26.8483755044049	0.328104100620747	9.37583865977617	0	0	0	0	0	0	0	0	0	0	0	0
A04-Ch5		SYBR	Unknown		AGO4	81.05	597.735637493265	1.70377107004377	1083.97536419826	0	0	0	0	0	0	0	0	0	0	0	0
A05-Ch3		ROX	Unknown		AGO4	85.79	34.4468044725743	0.428008012086153	15.6927815898634	0	0	0	0	0	0	0	0	0	0	0	0
A05-Ch5		SYBR	Unknown		AGO4	81.1000000000001	661.816608315803	1.79486932730258	1264.35642620117	0	0	0	0	0	0	0	0	0	0	0	0
A06-Ch3		ROX	Unknown		AGO4	65.25	181.096417835232	1.05296550449599	202.965875463226	0	0	0	0	0	0	0	0	0	0	0	0
A06-Ch5		SYBR	Unknown		AGO4	80.99	403.485092018107	1.74963836178223	751.406258528827	0	0	0	0	0	0	0	0	0	0	0	0
A07-Ch3		ROX	Unknown		AGO4	90.6	37.1936279176168	0.0294375449180603	7.4387255835232	0	0	0	0	0	0	0	0	0	0	0	0
A07-Ch5		SYBR	Unknown		AGO4	80.87	396.222113687186	1.62896136813783	686.986998604574	0	0	0	0	0	0	0	0	0	0	0	0
A08-Ch3		ROX	Unknown		AGO4	90.25	47.801568389973	0.248195326137543	12.6280056507999	0	0	0	0	0	0	0	0	0	0	0	0
A08-Ch5		SYBR	Unknown		AGO4	81.12	660.882473078096	1.73424608816828	1219.92738532406	0	0	0	0	0	0	0	0	0	0	0	0
A09-Ch3		ROX	Unknown		AGO4	69.38	82.3769048372257	0.838777312823944	73.5446639729849	0	0	0	0	0	0	0	0	0	0	0	0
A09-Ch5		SYBR	Unknown		AGO4	81.1100000000001	498.597305898451	1.80460460039943	957.703358457563	0	0	0	0	0	0	0	0	0	0	0	0
A10-Ch3		ROX	Unknown		AGO4	90.23	42.4716336852336	0.303063977658749	13.7049170799664	0	0	0	0	0	0	0	0	0	0	0	0
A10-Ch5		SYBR	Unknown		AGO4	81.05	539.706295469432	1.64129562084242	942.851545828532	0	0	0	0	0	0	0	0	0	0	0	0
A11-Ch3		ROX	Unknown		AGO4	72.25	229.465965158902	0.629143463211134	153.662180138491	0	0	0	0	0	0	0	0	0	0	0	0
A11-Ch5		SYBR	Unknown		AGO4	81.23	569.595334787724	1.81209460032096	1098.61699382786	0	0	0	0	0	0	0	0	0	0	0	0
A12-Ch3		ROX	Unknown		AGO4	86.16	45.2409354572287	0.466049995364249	22.4420801015129	0	0	0	0	0	0	0	0	0	0	0	0
A12-Ch5		SYBR	Unknown		AGO4	81.26	621.976775660064	1.79942678719719	1191.26223094986	0	0	0	0	0	0	0	0	0	0	0	0
A13-Ch3		ROX	Unknown		AGO4	87.78	29.2404040466294	0.246094508457184	7.71581999690803	0	0	0	0	0	0	0	0	0	0	0	0
