# Supplementary material for: Genome-wide identification of gene families related to miRNA biogenesis in Mangifera indica L. and their possible role during heat stress
Source: PeerJ. 2024 Jul 17;12:e17737. doi: 10.7717/peerj.17737 (PMC11260077; doi:10.7717/peerj.17737)
Supplement: Supplemental Information 27 [file peerj-12-17737-s027.xlsx]

## Sheet: General Info
General Info
Ord File Name	C:\Users\Propietario\Documents\Andrés\Corrida final Tratados AGO4 15 julio 2018.ord
Software Version	2.2.250.602
Instrument Name	PR0961400539
Instrument Serial	PR0961400539
Instrument Version	PCR 2.3.2, RT 1.1.12.23
Used Data Step	1
Sample Group	Default
Protocol Log	StartTime: 15/07/2018 01:11:50 p.m.
	RunTime: 01:20:58
	Path: /SHARED/PCPTP
	No errors

## Sheet: Plate
Well	Fluorophore	Sample Type	Target	Description	Quantity	AD Std Value	Replicate	Sample Name		Sample Group	Default
A01-Ch1	[none]	[none]			0						A1
A01-Ch2	[none]	[none]			0						A2
A01-Ch3	[none]	[none]			0						A3
A01-Ch4	[none]	[none]			0						A4
A01-Ch5	[none]	[none]			0						A5
A02-Ch1	[none]	[none]			0						A6
A02-Ch2	[none]	[none]			0						A7
A02-Ch3	[none]	[none]			0						A8
A02-Ch4	[none]	[none]			0						A9
A02-Ch5	[none]	[none]			0						A10
A03-Ch1	[none]	[none]			0						A11
A03-Ch2	[none]	[none]			0						A12
A03-Ch3	[none]	[none]			0						A13
A03-Ch4	[none]	[none]			0						A14
A03-Ch5	[none]	[none]			0						A15
A04-Ch1	[none]	[none]			0						A16
A04-Ch2	[none]	[none]			0						B1
A04-Ch3	[none]	[none]			0						B2
A04-Ch4	[none]	[none]			0						B3
A04-Ch5	[none]	[none]			0						B4
A05-Ch1	[none]	[none]			0						B5
A05-Ch2	[none]	[none]			0						B6
A05-Ch3	[none]	[none]			0						B7
A05-Ch4	[none]	[none]			0						B8
A05-Ch5	[none]	[none]			0						B9
A06-Ch1	[none]	[none]			0						B10
A06-Ch2	[none]	[none]			0						B11
A06-Ch3	[none]	[none]			0						B12
A06-Ch4	[none]	[none]			0						B13
A06-Ch5	[none]	[none]			0						B14
A07-Ch1	[none]	[none]			0						B15
A07-Ch2	[none]	[none]			0						B16
A07-Ch3	[none]	[none]			0						C1
A07-Ch4	[none]	[none]			0						C2
A07-Ch5	[none]	[none]			0						C3
A08-Ch1	[none]	[none]			0						C4
A08-Ch2	[none]	[none]			0						C5
A08-Ch3	[none]	[none]			0						C6
A08-Ch4	[none]	[none]			0						C7
A08-Ch5	[none]	[none]			0						C8
A09-Ch1	[none]	[none]			0						C9
A09-Ch2	[none]	[none]			0						C10
A09-Ch3	[none]	[none]			0						C11
A09-Ch4	[none]	[none]			0						C12
A09-Ch5	[none]	[none]			0						C13
A10-Ch1	[none]	[none]			0						C14
A10-Ch2	[none]	[none]			0						C15
A10-Ch3	[none]	[none]			0						C16
A10-Ch4	[none]	[none]			0						D1
A10-Ch5	[none]	[none]			0						D2
A11-Ch1	[none]	[none]			0						D3
A11-Ch2	[none]	[none]			0						D4
A11-Ch3	[none]	[none]			0						D5
A11-Ch4	[none]	[none]			0						D6

## Sheet: Protocol
Reaction volume	10		Channel in use:
Consumable	1		Ch 1	No
Ramp rate	7		Ch 2	No
Heated lid ON	True		Ch 3	Yes (ROX)
Heated lid temperature	105		Ch 4	No
			Ch 5	Yes (SYBR)
	No	Cycle	Type	Information
	1		Temperature	Temp.: 95°C; Time:07:00
	2		Cycle	Number of cycles to loop:40; Number of steps inside loop:2
	3	*	. Temperature	Temp.: 95°C; Time:00:05
DA	4	*	. Temperature	Temp.: 60°C; Time:00:30; Data acquisition:True
	5		Temperature	Temp.: 60°C; Time:00:30
	6		Melting Curve	Start temperature:60°C; End temperature:95°C; Hold time:00:01; Temperature increment after hold:0.2°C
	7		Temperature	Temp.: 20°C; Time:00:10

## Sheet: Acquired Data 1
Data step:	4			Show channel:	Thresholds:
Sample Group:	Default		Ch 1	No
Method:	Threshold		Ch 2	No
Smoothing:	ON		Ch 3	No
Smoothing window:	5		Ch 4	No
Baseline:	Trend		Ch 5	Yes	70.87
Baseline range start:	3
Baseline range end:	7
Channel	Cycle	Temp	A1	A2	A3	A4	A5	A6	A7	A8	A9	A10	A11	A12	A13	A14	A15	A16	B1	B2	B3	B4	B5	B6	B7	B8
5	1	60	65.81	61.29	32.59	70.11	40.84	38.93	51.45	54.82	30.79	99.9	27.1	52.49	45	57.04	58.13	0.85	20.66	69.77	46.51	35.45	41.61	45.77	71.15	65.41
5	2	60	42.17	40.53	20.9	55.14	25.54	24.12	24.58	32.15	15.56	75.35	17.67	28.42	25.12	48.04	38.76	0	10.83	44.46	33.44	19.64	25.19	26.15	41.12	37.88
5	3	60	25.74	28.62	11.09	43.68	15.58	13.35	7.74	17.89	6.15	56.81	11.94	12.94	11.5	41.42	25.42	0.49	5.83	25.44	24.92	9.28	13.08	12.16	20.61	18.98
5	4	60	18.14	27.65	4.02	38.92	13.9	8.61	4.26	16.62	6.77	45.44	12.74	11.11	6.83	39.84	20.09	1.82	7.24	13.74	22.67	6.85	6.92	4.56	13.09	11.34
5	5	60	11.55	26.98	-4.49	29	6.21	1.28	0	10.81	2.14	36.58	6.77	2.54	0	33.09	12.17	5.27	6.29	5.84	18.64	0	0	0	3.13	1.83
5	6	60	13.83	32.75	-3.69	30.51	10.85	0	5.22	10.84	4.21	39.37	9.85	3.27	3.81	30.29	12.78	14.76	7.53	6.73	20.73	1.17	4.15	5.47	5.24	6.74
5	7	60	24.94	39.81	2.86	44.8	21.79	7.72	17.12	19.54	13.23	47.63	19.93	11.72	15.94	29.5	15.44	30.65	10.08	19.27	23.49	7.84	10.32	13.8	14.78	14.17
5	8	60	29.35	42.41	3.22	49.07	28.84	12.82	25.15	24.88	17.7	50.28	24.51	15.03	22.65	24.98	19.04	52.09	12.68	25.17	25.7	17.1	14.18	16.26	22.68	20.88
5	9	60	27.81	41.49	-1.92	44.75	26.56	12.4	26.71	26.54	17.97	47.99	21.33	12.33	23.35	19.71	16.11	74.45	14.69	26.87	23.62	17.5	13.2	15.97	21.96	17.86
5	10	60	19.52	38.49	-8.71	37.41	24.03	7.72	25.95	17.6	11.57	41.13	16.44	11.85	19.04	13.19	13.48	94.98	13.17	21.32	21.85	14.43	11.28	12.9	19.42	14.06
5	11	60	21.22	40.95	-9.65	39.76	22.55	10.93	27.99	17.81	13.5	40.52	17.82	17.63	19.78	6.35	13.1	108.45	14.46	21.32	20.36	15.96	9.93	13.44	18.34	15.33
5	12	60	19.69	37.93	-11.72	36.03	17.28	11.96	27.79	18.23	11.36	39.03	14.67	15.5	16.26	11.34	15.44	119.64	12.2	17.73	20.11	20.28	10.24	11.93	17.58	13.75
5	13	60	24.45	38.67	-14.12	33.86	16.87	15.37	29.37	23.03	9.55	43.96	18	14.68	16.95	20.53	16.24	128.63	12.27	20.84	20.32	24.28	10.15	13.99	17	14.58
5	14	60	25.61	39.2	-16.82	34.16	18.72	19.16	32.5	21.96	9.83	44.67	22.72	17.27	21.07	27.16	18.08	131.74	13.69	26.22	18.72	25.24	15.03	15.27	19.02	15.23
5	15	60	24.45	38.81	-20.87	33.39	17.23	20	32.86	19.61	11.26	43.4	20.76	18.33	22.52	19.81	15.48	130.13	13.66	27.65	15.71	25.33	15.32	14.36	19.02	16.66
5	16	60	17.69	32.38	-26.47	25.91	11.14	16.84	29.98	12.71	7.95	35.8	12	11.14	15.41	13.43	12.2	126.77	10.56	19.01	11.62	22.47	12.43	9.57	13.95	10.26
5	17	60	14	29.42	-31.56	20.38	10.01	14.65	28.64	9.46	4.91	31.92	8.47	8.06	10.27	5.57	8.22	126.42	9.35	14.65	10.21	24.52	11.33	9.08	8.97	7.81
5	18	60	8.49	27.22	-39.44	15.46	7.04	11.91	25.93	6.44	2.55	26.06	6.82	5.69	8.55	4.83	6.05	125.51	8.06	11.7	7.07	20.98	11.62	6.49	3.06	4.26
5	19	60	2.38	22.64	-44.4	10.67	2.34	8.56	23.02	2.49	0	22.23	0.63	4.42	9.08	4.25	2.32	126.72	2.84	9.61	4.35	16.17	11.79	5.11	0	0.81
5	20	60	0.11	18.32	-47.4	5.84	0	8.3	21.29	0	0.87	21.9	0	4.28	6.78	4.08	2.22	127.73	0	6.86	3.31	13.89	14.88	4.01	0.62	0
5	21	60	0.48	20.25	-46.18	7.86	2.5	11.63	24.94	3.56	5.24	20.68	2.47	6.47	8.45	2.63	7.62	128.92	2.52	10.29	3.5	19.47	18.14	8.43	7.11	4.11
5	22	60	2.08	23.03	-48.33	9.72	8.03	14.21	26.27	10.5	10.72	20.52	8.63	6.77	7.73	4.31	16.19	125.93	6.63	13.92	3.52	23.21	21.4	12.93	10.56	10.69
5	23	60	10.75	22.76	-49.1	10.14	11.25	14.07	26.69	18	14.58	18.91	8.29	9.39	10.7	4.42	13.52	123.11	7.26	15.5	5.16	27.12	22.09	16.65	12.16	14.45
5	24	60	20.54	24.21	-49.5	11.36	15.49	13.91	27.5	22.82	16.8	20.95	14.88	13.89	11.41	6.14	9.82	122.55	10.99	17.34	8.17	31.49	27.04	20.39	16.37	15.98
5	25	60	21.52	24.76	-49.41	15.92	15.54	14.8	31.05	27.29	18.82	21.56	20.39	16.56	15.59	7.75	7.57	124.19	15.99	18.22	7.93	31.92	27.95	22.45	18.3	18.46
5	26	60	8.2	11.67	-59.09	8.3	8.09	9.53	27.05	18.41	10.8	14.92	15.09	5.69	7.03	2.13	4.73	120.34	11.5	6.71	3.52	23.75	21.5	18.52	9.7	11.72
5	27	60	0	0	-67.39	0	1.6	4.18	20.49	12.37	4.67	6.71	6.42	0	3.42	0	0	116.88	6.61	0	0	15.91	14.76	11.76	3.76	4.96
5	28	60	2.34	1.2	-69.4	2.57	5.86	6.74	20.71	16.4	6.56	3.16	8.84	6.7	9.11	2.22	6.77	118.22	10.19	4.21	0.86	16.73	16.34	12.79	8.27	8.53
5	29	60	10.77	12.58	-62.85	13.99	17.92	12.09	29.5	29.76	18.21	11.15	20.59	19.72	22.77	8.48	15.96	121.8	19.8	20.8	4.26	25.07	26.4	20.5	18.93	23.4
5	30	60	16.91	19.35	-62.13	16.35	22.97	14.69	34.75	37.05	21.23	15.5	25.15	23.86	26.64	11.84	18.47	122.67	24.12	27.87	5.88	29.95	27.49	25.14	21.19	27.64
5	31	60	13.19	16.41	-68.62	8.68	16.78	9.19	31.1	31.28	15.6	11.01	20.04	19.25	21.55	7.81	12.51	119.38	20.8	22.67	3.27	26.42	22.33	19.69	16.09	18.95
5	32	60	12.27	12.92	-73.41	5.32	14.22	9.56	27.18	32.51	13.32	6.92	16.12	21.84	20.32	5.01	13.25	118.54	20.27	18.57	3.26	27.59	20.2	19.18	14.2	17.66
5	33	60	8.81	8.5	-75.2	6.21	12.44	6.53	23.5	30.83	11.47	8.04	13.31	20.84	18.1	3.82	12.54	116.2	17.69	17.58	3.37	27.46	22.13	20.25	14.8	15.95
5	34	60	14.98	14.51	-73.16	12.67	17.6	8.37	27.07	35.92	14.29	9.33	19.44	26.54	24.41	9.06	17.98	117.02	19.71	23.01	5.1	29.84	26.6	24.33	19.16	21.08
5	35	60	16.35	12.03	-77.77	5.43	12.68	2.38	24.9	28.9	8.82	2.23	17.22	23.71	23.34	5.19	14.43	114.67	18.36	15.56	3.49	23.94	23.19	19.37	15.71	16.55
5	36	60	20.54	10.17	-81.07	0.07	10.94	1.14	23.36	27.96	6.82	0	15.03	22.74	24.56	2.7	13.77	111.22	19.53	14.64	2.52	25.2	20	19.29	11.65	14.2
5	37	60	22.72	10.31	-82.52	2.08	10.72	3.39	22.98	29.16	10.08	1.29	10.81	20.96	23.42	5.7	11.72	108.55	19.51	14.8	3.42	26.4	21.39	21.65	12.4	15.23
5	38	60	28.84	17.97	-79.6	7.3	17.69	8.53	26.49	33.8	18.39	4.42	15.11	25.89	28.81	12.81	17.51	110.22	21.26	22.17	5.83	30.17	25.99	25.63	16.74	22.7
5	39	60	28.67	20.08	-80.28	6.4	17.09	8.43	26.99	35.54	16.44	4.89	16.49	29.39	29.2	15.15	18.43	111.02	20.24	23.85	5.98	29.78	27.53	25.22	17.24	23.38
5	40	60	24.11	18.81	-82.95	0.27	11.68	4.57	25.2	35	7.11	3.29	16.69	32.64	26.42	14.46	16.54	111.92	17.29	21.95	4.49	26.01	26.94	21.06	14.88	19.46

## Sheet: Cq Results
Data step:	4			Show channel:	Thresholds:
Sample Group:	Default		Ch 1	No
Method:	Threshold		Ch 2	No
Smoothing:	ON		Ch 3	No
Smoothing window:	5		Ch 4	No
Baseline:	Trend		Ch 5	Yes	70.87
Baseline range start:	3
Baseline range end:	7
Well	Replicate	Fluorophore	Sample Type	Sample Name	Target	Cq	Quantity	Omitted	Description
A01-Ch5		[none]	[none]			NeuN	0
A02-Ch5		[none]	[none]			NeuN	0
A03-Ch5		[none]	[none]			NeuN	0
A04-Ch5		[none]	[none]			NeuN	0
A05-Ch5		[none]	[none]			NeuN	0
A06-Ch5		[none]	[none]			NeuN	0
A07-Ch5		[none]	[none]			NeuN	0
A08-Ch5		[none]	[none]			NeuN	0
A09-Ch5		[none]	[none]			NeuN	0
A10-Ch5		[none]	[none]			NeuN	0
A11-Ch5		[none]	[none]			NeuN	0
A12-Ch5		[none]	[none]			NeuN	0
A13-Ch5		[none]	[none]			NeuN	0
A14-Ch5		[none]	[none]			NeuN	0
A15-Ch5		[none]	[none]			NeuN	0
A16-Ch5		[none]	[none]			8.84	0
B01-Ch5		[none]	[none]			NeuN	0
B02-Ch5		[none]	[none]			NeuN	0
B03-Ch5		[none]	[none]			NeuN	0
B04-Ch5		[none]	[none]			NeuN	0
B05-Ch5		[none]	[none]			NeuN	0
B06-Ch5		[none]	[none]			NeuN	0
B07-Ch5		[none]	[none]			NeuN	0
B08-Ch5		[none]	[none]			NeuN	0
B09-Ch5		[none]	[none]			NeuN	0
B10-Ch5		[none]	[none]			NeuN	0

## Sheet: Melt Curve Data
Sample Group:	Default		Show channel:
Smoothing:	ON		Ch 1	No
Smoothing window:	9		Ch 2	No
Low limit	63.5		Ch 3	Yes
High limit	91.5		Ch 4	No
Max # of peaks:	1		Ch 5	Yes
Peak threshold:	10
Slope Correction:	Yes
Derivative:	Negative
Temp	Channel	A1	A2	A3	A4	A5	A6	A7	A8	A9	A10	A11	A12	A13	A14	A15	A16	B1	B2	B3	B4	B5	B6	B7	B8	B9
60	3	34.9	38.85	33.37	17.72	33.13	58.83	251.51	199.21	56.71	21.2	38.64	142.69	25.38	17.2	16.26	26.39	41.09	31.32	36.1	37.62	32.82	32.93	30.09	36.06	28.44
60	5	1111.56	1065.56	604.83	1144.23	1361.72	724.47	663.92	1227.51	1096.49	883.63	1180.39	1093.21	1035.77	745.62	643.57	154.58	923.08	1289.68	524	930.86	1112.69	974.13	1180.74	1328.38	1008.54
60.2	3	32.73	37.14	32.95	19.47	34.15	58.45	248.7	207.9	55.82	18.91	38.05	148.51	24.05	15.63	16.87	26.32	41.44	32.57	36.35	37.59	34.14	32.68	29.68	35.14	29.4
60.2	5	1113.8	1066.65	606.34	1146.71	1362.75	724.53	663.1	1229.35	1099.64	884.55	1184.07	1096.1	1038.53	747.52	645.85	156.93	924.51	1290.05	525.05	930.35	1111.78	975	1183.87	1331.11	1012.49
60.4	3	30.94	35.68	32.44	20.76	34.67	58.15	244.02	216.61	55.01	17.08	37.46	152.21	22.85	14.44	17.14	26	41.53	33.31	36.27	37.29	34.88	32.25	29.23	34.23	29.99
60.4	5	1114.31	1066.09	607.05	1147.52	1362.03	723.32	661.43	1229.66	1101.47	884.26	1185.59	1097.13	1039.6	748.02	646.69	158.41	924.14	1289.05	525.27	928.53	1109.36	974.4	1185.17	1331.78	1014.62
60.6	3	29.53	34.47	31.82	21.6	34.69	57.92	237.46	225.34	54.29	15.7	36.86	153.8	21.79	13.63	17.07	25.45	41.37	33.54	35.86	36.73	35.04	31.62	28.74	33.31	30.22
60.6	5	1113.09	1063.87	606.96	1146.66	1359.54	720.86	658.91	1228.43	1101.99	882.77	1184.96	1096.29	1038.98	747.11	646.1	159.02	921.95	1286.68	524.66	925.39	1105.44	972.34	1184.64	1330.38	1014.92
60.8	3	28.51	33.5	31.1	21.99	34.2	57.78	229.02	234.1	53.64	14.79	36.27	153.28	20.86	13.2	16.65	24.65	40.94	33.26	35.11	35.91	34.6	30.79	28.19	32.39	30.08
60.8	5	1110.13	1059.99	606.07	1144.11	1355.3	717.14	655.54	1225.67	1101.2	880.06	1182.18	1093.6	1036.67	744.81	644.08	158.75	917.96	1282.95	523.2	920.94	1100.01	968.82	1182.27	1326.92	1013.39
61	3	28.02	32.79	29.3	21.91	32.54	58.46	217.22	244.7	52.4	14.73	36.16	150.3	20.01	13.75	14.71	22.5	39.71	31.32	33.59	33.89	33.11	29.43	27.55	32.01	29.37
61	5	1103.06	1052.12	602.44	1138.26	1348.06	711.08	650.02	1220.39	1097.19	874.48	1175.31	1087.6	1031.32	739.4	639.7	156.99	910.35	1275.77	519.53	913.82	1091.03	962.46	1175.7	1318.66	1007.89
61.2	3	28.31	32.61	28.85	20.9	30.73	58.4	205.41	253.4	52.24	14.27	34.96	145.93	19.26	14.77	13.99	22.52	38.38	31.44	31.86	33.06	31.7	27.59	26.5	31.08	28.69
61.2	5	1097.93	1046.47	600.82	1133.23	1340.77	705.04	645.48	1214.52	1094.56	870.06	1168.57	1081.52	1025.42	734.89	634.42	155.31	903.87	1270.62	517.3	907.58	1083.72	957.35	1171.44	1311.31	1003.74
61.4	3	27.43	32.78	29.02	20.65	30.1	58.39	193.73	261.6	52.76	14.54	35.85	140.32	18.16	14.66	14.35	21.96	39.67	32.33	32.68	32.08	31.96	27.22	27.7	29.8	28.17
61.4	5	1092.59	1039.53	597.84	1128.44	1332.86	698.3	640.68	1208.92	1091.86	864.83	1161.53	1075.95	1020.46	730.8	631.33	152.91	896.32	1265.14	514.78	900.47	1076.58	951.47	1165.02	1305.38	998.47
61.6	3	28.47	32.19	30.63	19.94	30.88	59.19	181.5	268.95	53.43	15.21	36.73	134	17.66	14.61	12.58	21.61	39.16	31.01	32.17	32.88	31.49	27.27	27.8	30.56	29.22
61.6	5	1085.08	1033.19	594.47	1121.44	1323.11	691.31	634.05	1200.89	1088	858.12	1152.67	1068.34	1014.52	726.55	625.57	151.26	887.92	1256.81	511.31	891.83	1066.21	942.35	1158.64	1297.18	992.39
61.8	3	30.32	32.54	31.98	19.88	30.87	59.68	169.17	271.73	53.62	15.32	37.26	127.83	19.17	14.82	11.38	20.41	38.53	31.14	31.65	32.9	32.52	28	26.99	30.17	30.01
61.8	5	1080.31	1027.14	592.44	1116.19	1315.59	686.12	630.59	1194.63	1083.83	853.57	1147.03	1061.85	1008.76	722.26	621.74	150.38	881.75	1250.87	508.07	884.62	1060.01	935.71	1153.18	1291.34	988.08
62	3	30.11	32.75	33.08	19.42	31.03	61.05	157.33	270.32	54.32	15.4	38.35	120.57	19.75	14.64	12.51	19.92	37.97	31.56	31.29	33.44	32.88	28.1	27.33	30.17	30.08
62	5	1075.58	1021.17	588.71	1111.78	1306.57	681.7	626.45	1188.3	1079.53	848.39	1139.88	1056.17	1003.65	717.5	617.53	149.45	876.16	1245.32	504.79	877.33	1053.29	928.66	1147.87	1284.84	983.41
62.2	3	31.49	34.82	32.45	21.48	32.07	63.03	145.43	264.77	54.78	16.03	39.29	114.68	21.86	14.38	13.08	22.02	38.18	33.16	32.41	33.8	34.37	28.2	28.2	30.72	29.79
62.2	5	1071	1018.03	586.52	1108.81	1301.49	678.59	622.88	1183.75	1077.71	844.49	1137.35	1052.46	1000.42	714.25	614.32	149.48	873.05	1241.77	502.77	872.37	1049.48	924.18	1144.06	1279.4	980.54
62.4	3	31.7	35.1	31.61	23.13	31.03	65.78	133.07	254.97	53.55	15.58	39.7	106.72	23.02	16.03	14.01	22.7	37.68	33.95	32.79	34.21	34.19	27.93	29.38	31.44	29.68
62.4	5	1064.8	1012.51	583.58	1105.29	1295.39	674.68	619.41	1179.86	1075.75	842.08	1132.29	1048.12	996.41	710.51	613.26	148.79	870.52	1237.25	500.96	867.06	1043.74	919.59	1140.13	1273.32	978.44
62.6	3	30.46	33.99	29.11	24.14	29.41	66.86	120.64	239.35	50.83	15.75	38.27	99.25	22.51	14.7	15.15	21.94	36.77	30.78	31.58	32.87	31.92	26.42	28.43	30.27	27.76
62.6	5	1059.48	1008.08	581.92	1100.76	1291.55	671.29	616.56	1177.39	1073.73	839.54	1127.82	1043.41	992.49	708.4	611.05	147.21	866.55	1232.77	498.11	863.28	1038.64	916.05	1135.45	1268.26	976.74
62.8	3	28.6	32.78	28.41	23.92	29.26	68.16	109.28	221.51	48.76	15.27	37.08	93.83	20.94	14.29	14.83	22.14	36.41	31.09	30.36	32.35	29.57	25.07	27.9	29.5	26.66
62.8	5	1057.6	1006.62	581.5	1099.22	1289.85	668.9	613.88	1176.25	1073.96	839.01	1124.18	1042.28	989.93	707.13	610.89	146.29	865.7	1230.83	497.9	861.33	1036.69	915.45	1133.84	1265.81	976.5
63	3	27.73	33.07	28.39	24.63	30.29	71.25	101.26	206.89	47.88	15.22	37.68	89.89	20.15	13.37	14.7	22.07	37.18	32.78	31.49	30.81	28.82	25.11	28.03	29.51	26.89
63	5	1054.61	1005.02	579.59	1098.67	1287.4	665.1	610.73	1174.15	1073.58	837.34	1121.37	1040.42	988.23	706.68	610.76	145.8	861.69	1227.13	496.78	857.86	1033.43	914.08	1129.76	1261.8	974.55
63.2	3	27.44	31.46	30.65	25.84	31.38	74.65	95	195.44	48.42	15.26	37.4	86.07	20.03	13.39	12.81	22.94	36.69	31.97	31.1	30.85	28.11	25.68	27.73	30.21	28.06
63.2	5	1051.98	1001.78	577.48	1095.13	1281.74	661.19	605.47	1169.32	1070.17	833.41	1116.15	1036.37	984.21	704.04	607.3	144.32	856.68	1222.17	494.18	853.7	1026.77	909.57	1124.97	1255.72	971.1
63.4	3	26.7	31.87	30.78	25.4	31.39	78.48	90.16	183.13	47.91	14.27	36.26	82.53	20.07	12.94	12	22.12	34.78	30.86	30.76	29.54	27.12	26.03	26.77	28.35	28.95
63.4	5	1046.11	994.67	573.31	1088.7	1272.98	654.98	599.5	1161.77	1063.87	828.04	1107.86	1030.07	976.25	697.98	602.42	142.15	848.83	1215.1	490.9	847.18	1020	902.96	1116.74	1246	964.52
63.6	3	25.84	31.74	30.85	24.45	31.54	83.25	85.43	171.96	47.3	13.68	35.06	77.75	19.51	12.73	10.75	22.56	32.77	31.34	30.37	28.58	26.26	25.92	26.13	27.39	28.08
63.6	5	1038.48	985.46	568.34	1081.22	1261.23	648.09	592.91	1152.17	1056.29	820.48	1097.62	1022.26	968.64	690.97	595.7	140.48	839.95	1206.61	486.67	839.62	1009.36	895.31	1107.17	1234.33	957.36
63.8	3	25.76	31.72	29.43	24.61	29.82	87.17	80.02	157.78	46.65	12.47	34.81	74.01	20.48	13.41	10.67	22.93	32.4	31.66	29.67	28.37	25.6	25.42	24.53	26.75	27.55
63.8	5	1032.57	980.2	565.58	1075.6	1252.39	643.81	589.18	1145.83	1052.07	815.85	1091.67	1017.02	963.34	686.97	592.06	140.18	833.68	1200.74	484.36	834.29	1003.49	890.69	1101.22	1225.82	952.14
64	3	25.71	31.43	28.06	24.65	27.99	92.39	75.46	142.77	45.33	11.98	35.09	72.11	19.93	13.67	11.65	21.89	32.6	31	29.09	28.64	24.9	24.22	24.45	26.63	26.52
64	5	1028.03	974.63	561.98	1071.34	1245.71	640.46	586.25	1140.73	1049.58	813.17	1085.11	1012.12	958.48	682.85	589.11	140.61	829.35	1195.39	483.01	830.26	996.89	886.28	1095.43	1220	947.66
64.2	3	23.53	29.37	25.38	23.16	25.4	97.21	69.39	125.78	42.71	11.69	34.64	69.04	18.15	11.62	10	19.88	31.81	28.44	27.61	27.18	24.5	21.77	22.24	25.2	25.67
64.2	5	1026.56	973.13	562.12	1070.88	1243.8	639.4	586.13	1140.27	1050.42	812.6	1083.74	1010.5	958.14	683.45	589.4	140.68	827.93	1192.16	482.5	829.32	995.34	884.76	1093.23	1218.36	946.66

## Sheet: Melting curve Results
Sample Group:	Default		Show channel:
Smoothing:	ON		Ch 1	No
Smoothing window:	9		Ch 2	No
Low limit	63.5		Ch 3	Yes
High limit	91.5		Ch 4	No
Max # of peaks:	1		Ch 5	Yes
Peak threshold:	10
Slope Correction:	Yes
Derivative:	Negative
Well	Replicate	Fluorophore	Sample Type	Sample Name	Target	Melt Temp 1	Peak Height 1	FW/HM Peak 1	Area Peak 1	Melt Temp 2	Peak Height 2	FW/HM Peak 2	Area Peak 2	Melt Temp 3	Peak Height 3	FW/HM Peak 3	Area Peak 3	Melt Temp 4	Peak Height 4	FW/HM Peak 4	Area Peak 4	Description
A01-Ch3		[none]	[none]			85.8	34.0210340296889	0.310841584718228	11.2601959596261	0	0	0	0	0	0	0	0	0	0	0	0
A01-Ch5		[none]	[none]			83.8899999999999	606.701785362065	1.46659572565067	947.075736937311	0	0	0	0	0	0	0	0	0	0	0	0
A02-Ch3		[none]	[none]			87.11	37.8821963711028	0.317113515937328	12.7832566067733	0	0	0	0	0	0	0	0	0	0	0	0
A02-Ch5		[none]	[none]			83.82	596.432720362436	1.48061159486021	939.943241844389	0	0	0	0	0	0	0	0	0	0	0	0
A03-Ch3		[none]	[none]			87.1000000000001	56.6302694383608	0.494388294281066	29.7999701928637	0	0	0	0	0	0	0	0	0	0	0	0
A03-Ch5		[none]	[none]			83.6999999999999	392.878833455576	1.22922129547675	514.029128476775	0	0	0	0	0	0	0	0	0	0	0	0
A04-Ch3		[none]	[none]			82.2	31.4420718166366	0.0294375449180603	6.28841436332741	0	0	0	0	0	0	0	0	0	0	0	0
A04-Ch5		[none]	[none]			84.0499999999999	707.415925229485	1.265661692021	952.996905670541	0	0	0	0	0	0	0	0	0	0	0	0
A05-Ch3		[none]	[none]			84.96	65.7915362725552	0.555396476827562	38.8930651169172	0	0	0	0	0	0	0	0	0	0	0	0
A05-Ch5		[none]	[none]			84.17	783.676804805903	1.25004047335661	1042.70172046135	0	0	0	0	0	0	0	0	0	0	0	0
A06-Ch3		[none]	[none]			67.36	48.4593583741703	1.40050183662171	72.2371103661475	0	0	0	0	0	0	0	0	0	0	0	0
A06-Ch5		[none]	[none]			83.93	409.480840347216	1.20384106019991	524.688759837018	0	0	0	0	0	0	0	0	0	0	0	0
A07-Ch3		[none]	[none]			87.02	377.027817414634	0.459038699537516	184.213613762921	0	0	0	0	0	0	0	0	0	0	0	0
A07-Ch5		[none]	[none]			83.79	384.702576844074	1.19428407932022	489.025787297022	0	0	0	0	0	0	0	0	0	0	0	0
A08-Ch3		[none]	[none]			86.95	279.324484408269	0.391504772061109	116.39788486464	0	0	0	0	0	0	0	0	0	0	0	0
A08-Ch5		[none]	[none]			84.13	736.713345376198	1.23257359207948	966.519050326378	0	0	0	0	0	0	0	0	0	0	0	0
A09-Ch3		[none]	[none]			88.6	67.4731425731416	0.0294375449180603	13.494628514628	0	0	0	0	0	0	0	0	0	0	0	0
A09-Ch5		[none]	[none]			84.21	618.546000421984	1.20884302748661	795.867803080358	0	0	0	0	0	0	0	0	0	0	0	0
A10-Ch3		[none]	[none]			84.9	16.5140468249796	0.344555564796925	6.05604864874202	0	0	0	0	0	0	0	0	0	0	0	0
A10-Ch5		[none]	[none]			83.2399999999999	310.814025776751	2.1088708456266	697.669302044597	0	0	0	0	0	0	0	0	0	0	0	0
A11-Ch3		[none]	[none]			73.95	184.813095085505	0.701234212802723	137.941473199697	0	0	0	0	0	0	0	0	0	0	0	0
A11-Ch5		[none]	[none]			84.27	646.42333543776	1.30124876100453	895.316065457021	0	0	0	0	0	0	0	0	0	0	0	0
A12-Ch3		[none]	[none]			88.75	218.956931363527	0.266172140264511	62.032647565659	0	0	0	0	0	0	0	0	0	0	0	0
A12-Ch5		[none]	[none]			84.11	611.031933659407	1.4317491665537	931.171916661698	0	0	0	0	0	0	0	0	0	0	0	0
A13-Ch3		[none]	[none]			84.81	28.9158904582374	0.417485411828756	12.8492284338846	0	0	0	0	0	0	0	0	0	0	0	0
