# Supplementary material for: Genome-wide identification of gene families related to miRNA biogenesis in Mangifera indica L. and their possible role during heat stress
Source: PeerJ. 2024 Jul 17;12:e17737. doi: 10.7717/peerj.17737 (PMC11260077; doi:10.7717/peerj.17737)
Supplement: Supplemental Information 28 [file peerj-12-17737-s028.xlsx]

## Sheet: General Info
General Info
Ord File Name	C:\Users\Propietario\Documents\Andrés\Corrida final Controles AGO16 14 julio 2018.ord
Software Version	2.2.250.602
Instrument Name	PR0961400539
Instrument Serial	PR0961400539
Instrument Version	PCR 2.3.2, RT 1.1.12.23
Used Data Step	1
Sample Group	Default
Protocol Log	StartTime: 14/07/2018 11:46:48 a.m.
	RunTime: 01:20:41
	Path: /SHARED/PCPTP
	No errors

## Sheet: Plate
Well	Fluorophore	Sample Type	Target	Description	Quantity	AD Std Value	Replicate	Sample Name		Sample Group	Default
A01-Ch1	[none]	[none]			0						A1
A01-Ch2	[none]	[none]			0						A2
A01-Ch3	ROX	Unknown	AGO16		0						A3
A01-Ch4	[none]	[none]			0						A4
A01-Ch5	SYBR	Unknown	AGO16		0						A5
A02-Ch1	[none]	[none]			0						A6
A02-Ch2	[none]	[none]			0						A7
A02-Ch3	ROX	Unknown	AGO16		0						A8
A02-Ch4	[none]	[none]			0						A9
A02-Ch5	SYBR	Unknown	AGO16		0						A10
A03-Ch1	[none]	[none]			0						A11
A03-Ch2	[none]	[none]			0						A12
A03-Ch3	ROX	Unknown	AGO16		0						A13
A03-Ch4	[none]	[none]			0						A14
A03-Ch5	SYBR	Unknown	AGO16		0						A15
A04-Ch1	[none]	[none]			0						A16
A04-Ch2	[none]	[none]			0						B1
A04-Ch3	ROX	Unknown	AGO16		0						B2
A04-Ch4	[none]	[none]			0						B3
A04-Ch5	SYBR	Unknown	AGO16		0						B4
A05-Ch1	[none]	[none]			0						B5
A05-Ch2	[none]	[none]			0						B6
A05-Ch3	ROX	Unknown	AGO16		0						B7
A05-Ch4	[none]	[none]			0						B8
A05-Ch5	SYBR	Unknown	AGO16		0						B9
A06-Ch1	[none]	[none]			0						B10
A06-Ch2	[none]	[none]			0						B11
A06-Ch3	ROX	Unknown	AGO16		0						B12
A06-Ch4	[none]	[none]			0						B13
A06-Ch5	SYBR	Unknown	AGO16		0						B14
A07-Ch1	[none]	[none]			0						B15
A07-Ch2	[none]	[none]			0						B16
A07-Ch3	ROX	Unknown	AGO16		0						C1
A07-Ch4	[none]	[none]			0						C2
A07-Ch5	SYBR	Unknown	AGO16		0						C3
A08-Ch1	[none]	[none]			0						C4
A08-Ch2	[none]	[none]			0						C5
A08-Ch3	ROX	Unknown	AGO16		0						C6
A08-Ch4	[none]	[none]			0						C7
A08-Ch5	SYBR	Unknown	AGO16		0						C8
A09-Ch1	[none]	[none]			0						C9
A09-Ch2	[none]	[none]			0						C10
A09-Ch3	ROX	Unknown	AGO16		0						C11
A09-Ch4	[none]	[none]			0						C12
A09-Ch5	SYBR	Unknown	AGO16		0						C13
A10-Ch1	[none]	[none]			0						C14
A10-Ch2	[none]	[none]			0						C15
A10-Ch3	ROX	Unknown	AGO16		0						C16
A10-Ch4	[none]	[none]			0						D1
A10-Ch5	SYBR	Unknown	AGO16		0						D2
A11-Ch1	[none]	[none]			0						D3
A11-Ch2	[none]	[none]			0						D4
A11-Ch3	ROX	Unknown	AGO16		0						D5
A11-Ch4	[none]	[none]			0						D6

## Sheet: Protocol
Reaction volume	10		Channel in use:
Consumable	1		Ch 1	No
Ramp rate	7		Ch 2	No
Heated lid ON	True		Ch 3	Yes (ROX)
Heated lid temperature	105		Ch 4	No
			Ch 5	Yes (SYBR)
	No	Cycle	Type	Information
	1		Temperature	Temp.: 95°C; Time:07:00
	2		Cycle	Number of cycles to loop:40; Number of steps inside loop:2
	3	*	. Temperature	Temp.: 95°C; Time:00:05
DA	4	*	. Temperature	Temp.: 60°C; Time:00:30; Data acquisition:True
	5		Temperature	Temp.: 60°C; Time:00:30
	6		Melting Curve	Start temperature:60°C; End temperature:95°C; Hold time:00:01; Temperature increment after hold:0.2°C
	7		Temperature	Temp.: 20°C; Time:00:10

## Sheet: Acquired Data 1
Data step:	4			Show channel:	Thresholds:
Sample Group:	Default		Ch 1	No
Method:	Threshold		Ch 2	No
Smoothing:	ON		Ch 3	No
Smoothing window:	5		Ch 4	No
Baseline:	Trend		Ch 5	Yes	93.07
Baseline range start:	3
Baseline range end:	7
Channel	Cycle	Temp	A1	A2	A3	A4	A5	A6	A7	A8	A9	A10	A11	A12	A13	A14	A15	A16	B1	B2	B3	B4	B5	B6	B7	B8
5	1	60	-4.69	-3.51	-3.12	-4.85	-6.12	-5.84	-5.09	-4.27	-5.7	-6.52	-3.55	-2.8	-5.95	-6.3	-3.99	0.49	-4.11	-5.4	-4.36	-2.63	-3.97	-4.11	-3.58	-4.95
5	2	60	-2.36	-1.28	-0.93	-1.67	-1.39	-3.25	-2.29	-1.59	-2.37	-2.34	-1.05	1.55	-1.85	-1.09	-1.98	4.06	-0.81	-1.67	-1.04	-1.29	-1.35	-1.06	-0.05	-1.6
5	3	60	-1.3	-0.25	-0.17	-0.06	0.78	-1.98	-0.76	-0.21	-0.82	-0.02	-0.14	2.95	-0.11	1.01	-0.91	5.92	0.56	-0.02	0.48	-1.01	-0.26	0.38	1.22	-0.04
5	4	60	-1.73	-0.18	-1.29	-0.1	-0.46	-2.49	-0.4	-0.15	-1.02	0.65	-1.75	1.3	-1.9	-1.1	-1.29	5.47	-0.22	-1.63	-0.28	-2.32	-1.12	0.09	-0.55	-0.51
5	5	60	-2.21	-2.41	-1.4	-0.75	-1.36	-2.11	-0.96	-0.85	-2.1	-1.08	-2.63	-1.03	-2.32	-2.49	-1.31	4.97	-1.14	-1.14	-1.11	-1.81	-1.07	-0.45	-1.07	-1.2
5	6	60	-0.23	-1.58	-0.77	-0.55	-1.4	-1.38	-0.61	-1.16	-1.57	-0.78	-0.98	-1.12	-0.14	-2.44	-1.02	4.94	-1.13	0.47	-0.79	-0.42	-1.3	-0.91	-0.53	-0.45
5	7	60	1.98	2.04	2.19	0.08	0.91	1.47	2.19	0.31	2.29	0.12	0.49	1.04	2.38	0.38	1.68	5.8	1.28	3	1.53	1.93	0.78	0.46	0.63	2.04
5	8	60	3.12	4.3	1	-0.16	2.05	2.34	2.01	1.06	3.4	1.64	1.94	0.35	2.94	2.16	4.27	6.32	1.03	2.64	1.88	1.34	1.53	1.19	0.14	1.94
5	9	60	2.62	1.96	0.66	0.8	1.7	2.79	0.52	0.35	3.31	1.25	1.8	-1.29	1.82	2.34	2.82	6.8	0.34	1.61	1.4	1.97	2.38	0.68	-0.06	2.26
5	10	60	3.06	-0.64	0.01	3.18	1.47	1.93	0.48	0.76	1.94	1.36	1.29	-2.31	1.83	3.59	1.43	6.22	-0.01	1.01	0.62	1.56	1.87	0.63	0.82	1.66
5	11	60	2.64	-0.06	1.33	3.47	1.81	2.64	1.45	1.36	1.66	1.44	0.55	-1.17	1.68	2.68	0.13	7.34	0.92	1.09	1.66	1.51	1.49	1.16	0.82	1.74
5	12	60	3.61	1.42	1	3.1	2.5	3.83	2.42	2.7	1.85	3.23	1.52	0.43	2.43	2.41	1.16	8.78	2.7	1.93	2.05	0.38	2.28	2.62	1.71	0.86
5	13	60	2.02	1.74	1.5	2.16	1.89	3.71	1.98	2.05	1.57	3.24	1.61	0.35	2.03	1.64	0.3	9.5	2.4	1.38	1.04	0.77	1.44	1.88	1.55	0.95
5	14	60	1.28	1.51	1.94	1.57	2.04	3.49	2.45	2.56	2.67	2.49	2.86	1.13	3.25	3.57	1.97	9.52	2.39	2.03	0.08	1.61	0.96	0.71	1.4	1.38
5	15	60	0.1	0.67	1.5	-0.37	1.15	2.83	1.09	1.76	1.82	1.55	2.09	0.47	1.04	2.27	2.37	7.58	0.83	0.78	0.16	1.38	0.32	0.72	1.04	0.78
5	16	60	0.23	0.83	1.63	-0.06	1.89	3.14	0.61	1.5	2.35	1.34	1.75	0.16	0.89	1.25	2.23	7.5	0.17	1.14	0.48	1.33	0.46	1.71	1.03	1.47
5	17	60	-0.07	0.36	1.09	0.31	1.27	1.56	0.39	0.7	0.54	1.48	0.58	-0.13	1.25	0.85	0.22	7.66	-0.04	-0.35	0.17	1.05	0.28	0.35	0.22	1.11
5	18	60	1.17	2.78	2.53	2.03	1.9	2.89	2.79	2.11	1.16	3.17	2.55	0.72	2.37	1.29	0.98	9.2	1.82	0.92	0.75	2.41	1.87	0.12	1.16	1.25
5	19	60	0.04	0.1	-0.11	-0.11	-1.42	0.89	2.2	0.64	-0.13	1.13	0.79	-2.26	-0.6	-0.74	-0.53	5.76	1.43	-0.25	0.54	0.77	1.52	-0.67	0.76	-1.5
5	20	60	-1.39	-0.42	-0.49	-0.49	-0.94	0	0.75	0.02	-0.56	-1.35	0.45	-3.91	-0.77	-1.31	-1.01	4.94	-0.82	-0.52	0.03	0.57	-0.62	-0.14	-1.11	-1.28
5	21	60	-2.17	-2.01	-1.62	-1.22	-1.28	-1.37	-0.8	-1.52	-1.81	-3.37	-0.9	-6.2	-1.8	-2.61	-2.3	4.34	-2.18	-2.04	-0.27	-1.04	-0.75	-1.48	-2.52	-1.6
5	22	60	-2.37	-1.82	-1.82	-1.63	-0.89	-1.94	-1.28	-1.17	-1.65	-1.86	-0.84	-7.81	-2.96	-3.11	-1.79	5.73	-2.42	-1.85	-0.44	-1.69	-0.62	-0.82	-1.73	-1.38
5	23	60	-3.36	-3.56	-4.65	-2.5	-3	-4.29	-3.01	-2.35	-3.15	-2.16	-2.5	-10.34	-3.74	-4.25	-3.4	3.86	-3.01	-3.12	-2.27	-2.35	-1.91	-1.33	-1.29	-2.93
5	24	60	-3	-2.3	-3.91	-2.19	-3.09	-4.99	-3.64	-2.47	-3.68	-2.1	-3.03	-11.16	-1.76	-3.18	-3.04	2.2	-1.94	-1.71	-2.31	-1.82	-3	-0.81	-1.22	-2.44
5	25	60	0.05	0.7	-0.7	-1.45	-1.76	-3.88	-2.48	-2.11	-2.28	-2.73	-2.92	-11.82	0	-1.51	-0.66	0	0.14	1.54	-0.03	-2.17	-1.21	-0.92	2.55	-1.28
5	26	60	6.14	7.09	6.26	4.27	2.93	-0.17	2.13	2.04	4.51	-0.8	0.29	-10.49	5.09	5.06	8.09	2.81	6	11.15	6.5	-0.5	1.92	1.06	11.84	4.7
5	27	60	15.43	19.97	17.87	12.04	8.64	6.46	9.04	6.67	11.84	1.04	3.85	-8.01	16.35	16.13	22.32	5.83	15.74	27.21	15.42	3.8	4.14	6.36	29.34	15.33
5	28	60	29.03	41.87	35.4	20.79	15.18	13.58	16.87	12.19	20.01	2.45	5.2	-6.5	32.49	34.73	44.77	4.66	30.48	53.8	29.66	6.96	5.11	12.64	58.27	32.74
5	29	60	58.69	84.6	68.54	39.29	34.26	29.04	36.6	25.46	39.61	5.26	10.08	-2.17	65.27	72.79	94.01	4.18	62.65	105.18	58.19	12.61	11.54	26.05	115.86	65.64
5	30	60	115.21	163.13	130.55	80.27	71.35	59.03	71.08	53.77	79.72	10.18	20.63	5.09	127.04	140.21	183.87	6.26	126.18	201.93	115.08	24.38	25.15	52.06	217.52	129.04
5	31	60	205.7	291.32	230.14	152.47	135.87	111.46	132.18	105.06	151.37	18.15	39.32	18.85	232.17	254.57	321.37	6.17	225.31	356.1	210.78	45.26	48.35	97.32	366.19	233.08
5	32	60	336.96	475.9	368.97	276.14	242.32	200.82	237.38	196.47	271.45	32.01	73.93	45.35	394.08	421.84	503.48	5.35	361.68	568.86	356.09	86.42	90.13	175.15	550.98	383.39
5	33	60	491.42	693.41	527.73	464.11	402.74	347.02	405.67	348.16	446.09	62.5	140.98	99.95	605.25	627.83	703.49	10.81	521.11	806.25	540.34	167.75	172.03	301.41	737.89	564.64
5	34	60	631.43	889.52	665.6	686.35	587.14	530.38	607.6	552.84	642.97	117.58	256.38	189.27	815.29	822.13	875.85	15.15	667.38	1011.72	722.06	300.44	313.28	462.04	887.75	733.94
5	35	60	725.93	1025.45	757.21	885.79	746.19	704.68	790.85	764.32	810.35	209.99	419.72	306.47	969.21	963.08	987.57	15.29	763.56	1143.11	856.93	482.37	506.3	610.73	974.12	852.11
5	36	60	781.67	1099.65	807.96	1025.59	854.96	833.94	920.53	934.13	922.89	351.54	611.28	431.74	1057.45	1040.82	1049.26	13.67	817.1	1213.78	936.72	685.29	719.78	719.43	1014.85	915.19
5	37	60	809.52	1135.72	835.2	1106.55	916.86	911.77	996.42	1041.66	985.06	534.37	785.36	535.7	1105.22	1079.02	1076.23	13.99	845.22	1248.02	977.75	865.66	900.06	784.94	1032.89	946.52
5	38	60	823.97	1153.6	848.45	1147.57	954.72	953.75	1037.01	1100.19	1016.69	721.7	907.31	606.13	1130.04	1100.08	1090.81	13.53	861.54	1268.81	998.92	989.9	1020.65	825.02	1045.31	965.32
5	39	60	829.81	1161.74	854.5	1168.97	972.77	977.84	1055.34	1132.26	1031.88	860.12	979.18	647.18	1139.96	1105.97	1094.56	13.1	867.95	1275.68	1009.3	1063.35	1086.61	843.56	1048.18	973.25
5	40	60	825.35	1157.91	851.56	1165.1	969.39	979.23	1047.68	1131.84	1026.46	963.91	1000.69	657.93	1132.2	1095.58	1086.25	12.72	863.03	1267.95	1006.11	1085.67	1096.99	839.17	1041.61	969.63

## Sheet: Cq Results
Data step:	4			Show channel:	Thresholds:
Sample Group:	Default		Ch 1	No
Method:	Threshold		Ch 2	No
Smoothing:	ON		Ch 3	No
Smoothing window:	5		Ch 4	No
Baseline:	Trend		Ch 5	Yes	93.07
Baseline range start:	3
Baseline range end:	7
Well	Replicate	Fluorophore	Sample Type	Sample Name	Target	Cq	Quantity	Omitted	Description
A01-Ch5		SYBR	Unknown		AGO16	29.61	NeuN
A02-Ch5		SYBR	Unknown		AGO16	29.11	NeuN
A03-Ch5		SYBR	Unknown		AGO16	29.4	NeuN
A04-Ch5		SYBR	Unknown		AGO16	30.18	NeuN
A05-Ch5		SYBR	Unknown		AGO16	30.34	NeuN
A06-Ch5		SYBR	Unknown		AGO16	30.65	NeuN
A07-Ch5		SYBR	Unknown		AGO16	30.36	NeuN
A08-Ch5		SYBR	Unknown		AGO16	30.77	NeuN
A09-Ch5		SYBR	Unknown		AGO16	30.19	NeuN
A10-Ch5		SYBR	Unknown		AGO16	33.56	NeuN
A11-Ch5		SYBR	Unknown		AGO16	32.29	NeuN
A12-Ch5		SYBR	Unknown		AGO16	32.87	NeuN
A13-Ch5		SYBR	Unknown		AGO16	29.45	NeuN
A14-Ch5		SYBR	Unknown		AGO16	29.3	NeuN
A15-Ch5		SYBR	Unknown		AGO16	28.98	NeuN
A16-Ch5		SYBR	NTC		AGO16	NeuN	0
B01-Ch5		SYBR	Unknown		AGO16	29.48	NeuN
B02-Ch5		SYBR	Unknown		AGO16	28.76	NeuN
B03-Ch5		SYBR	Unknown		AGO16	29.61	NeuN
B04-Ch5		SYBR	Unknown		AGO16	32.08	NeuN
B05-Ch5		SYBR	Unknown		AGO16	32.04	NeuN
B06-Ch5		SYBR	Unknown		AGO16	30.91	NeuN
B07-Ch5		SYBR	Unknown		AGO16	28.6	NeuN
B08-Ch5		SYBR	Unknown		AGO16	29.43	NeuN
B09-Ch5		SYBR	Unknown		AGO16	28.6	NeuN
B10-Ch5		SYBR	Unknown		AGO16	29.66	NeuN

## Sheet: Melt Curve Data
Sample Group:	Default		Show channel:
Smoothing:	ON		Ch 1	No
Smoothing window:	9		Ch 2	No
Low limit	63.5		Ch 3	Yes
High limit	91.5		Ch 4	No
Max # of peaks:	1		Ch 5	Yes
Peak threshold:	10
Slope Correction:	Yes
Derivative:	Negative
Temp	Channel	A1	A2	A3	A4	A5	A6	A7	A8	A9	A10	A11	A12	A13	A14	A15	A16	B1	B2	B3	B4	B5	B6	B7	B8	B9
60	3	46.57	39.17	14	22.74	41.08	27.61	24.86	46.01	18.65	22.9	37.17	30.7	26.6	23.88	25.03	51.99	43.69	43.33	24.86	27.98	38.54	16.04	27.01	36.27	9.37
60	5	896.09	1270.04	955.59	1274.44	1049.24	1097.47	1149.06	1235.46	1126.14	1039.3	1100.24	776.88	1236.27	1195.5	1186.97	71.93	926.82	1375.73	1097.3	1179.87	1207.25	927.29	1132.59	1042.1	1059.08
60.2	3	46.31	40.04	15.4	23.5	39.86	27.93	25.45	45.45	17.46	22.82	36.34	30.04	26.49	24.22	22.4	48.82	43.71	42.32	25.42	29.23	38.55	16.86	25.89	37.02	10.93
60.2	5	888.52	1263.87	950.46	1267.4	1040.04	1090.42	1143.98	1229.04	1121.49	1033.47	1094.09	773.62	1230.74	1190.81	1180.89	70.5	919.17	1367.26	1092.07	1172.9	1202.54	923.13	1128.34	1032.15	1053.47
60.4	3	45.85	40.86	16.52	24.28	38.76	28.25	25.91	45.36	16.64	22.74	35.77	29.39	26.55	24.52	20.65	46.4	43.76	41.64	26.06	30.29	38.62	17.64	25.07	37.4	12.25
60.4	5	881.74	1259.02	946.56	1261.75	1031.87	1084.64	1139.82	1223.66	1117.66	1028.48	1088.93	770.55	1225.96	1186.87	1176.05	69.46	912.34	1360.29	1088.35	1167.43	1198.57	919.84	1125.09	1023.62	1049.16
60.6	3	45.19	41.63	17.36	25.05	37.79	28.59	26.23	45.74	16.17	22.66	35.45	28.76	26.78	24.79	19.77	44.73	43.82	41.27	26.81	31.16	38.76	18.39	24.54	37.43	13.32
60.6	5	875.75	1255.49	943.88	1257.48	1024.73	1080.13	1136.59	1219.34	1114.66	1024.33	1084.78	767.68	1221.93	1183.67	1172.45	68.83	906.33	1354.81	1086.16	1163.47	1195.34	917.42	1122.85	1016.52	1046.14
60.8	3	44.32	42.36	17.91	25.83	36.94	28.94	26.42	46.59	16.07	22.59	35.37	28.14	27.17	25.02	19.75	43.82	43.9	41.22	27.65	31.85	38.95	19.11	24.31	37.11	14.15
60.8	5	870.54	1253.29	942.41	1254.6	1018.61	1076.9	1134.29	1216.06	1112.48	1021.03	1081.63	764.99	1218.65	1181.22	1170.09	68.59	901.15	1350.82	1085.5	1161.01	1192.86	915.86	1121.62	1010.83	1044.41
61	3	42.11	42	17.97	26.1	34.51	29.12	26.06	48.8	16.88	22.22	34.62	26.88	26.66	24.83	22.32	43.53	43.69	42.64	28.77	31.84	39.17	20.12	23.21	36.24	14.96
61	5	864.97	1251.28	941.04	1251.12	1011.6	1072.95	1129.81	1211.89	1107.38	1016.53	1077.4	761.18	1213.56	1177.23	1166.83	68.51	894.58	1346.49	1085.6	1158.74	1188.56	913.71	1119.21	1004.69	1042.87
61.2	3	40.66	43.31	18.57	27.34	35.09	29.71	25.55	50.3	17.94	22.39	36.22	26.63	28.68	26	23.37	44.18	43.93	42.35	30.41	31.83	39.35	20.49	24.01	35.12	14.6
61.2	5	860.61	1249.89	941.12	1250.37	1006.05	1071.13	1129.44	1209.63	1107.26	1013.99	1075.17	757.35	1211.32	1174.59	1165.85	68.69	891.09	1345.32	1087.24	1158.74	1187.4	912.97	1119.33	1001.83	1042.1
61.4	3	41.15	44.86	17.81	28.11	36.54	30.3	26.63	51.68	18.76	23	36.66	26.3	30.11	26.04	24.94	45.68	43.9	42.88	30.55	32.34	40.14	21.46	25.93	34.4	14.64
61.4	5	855.4	1248.96	940.04	1248.76	1001.68	1068.99	1127.93	1207.12	1107.28	1012.06	1072.85	753.2	1208.43	1173.57	1164.37	68.69	885.39	1341.2	1086.9	1156.95	1184.62	912.01	1118.39	998.03	1041.16
61.6	3	40.64	46.26	18.93	28.76	36.84	29.81	27.97	52.71	20.37	23.15	38.19	27.01	31.73	26.72	26.69	48.08	43.98	43.48	29.29	33.75	41.35	21.88	27.47	33.9	14.64
61.6	5	858.67	1257.98	946.5	1257.71	1005.23	1077.73	1137.43	1215.37	1117.59	1019.14	1079.96	756.32	1217.12	1181.52	1174.83	70.07	890.37	1350.17	1096.53	1164.9	1192.19	920.3	1127.16	1002.68	1049.84
61.8	3	40.48	46.87	19.13	29.11	37.01	30.32	28.82	53.8	20.65	23.64	38.16	27.42	32.02	26.43	24.86	47.96	42.82	45.25	28.67	34.65	42.36	21.3	28.69	33.13	15
61.8	5	858.48	1263.38	950.23	1262.81	1006.63	1082.44	1143.86	1220.77	1123.49	1022.24	1082.92	757.8	1221.47	1185.51	1180.47	70.77	891.68	1353.69	1101.8	1168.83	1195.97	925.31	1131.95	1003.84	1054.86
62	3	40.74	47.56	19.49	31.37	36.64	31.21	30.57	55.2	22.12	25.33	37.97	26.97	30.89	28.09	27.27	48.73	41.71	46.59	28.92	36.22	40.97	20.87	29.66	33.42	15.05
62	5	856.6	1264.3	951.85	1264.67	1004.11	1082.45	1145.82	1221.88	1125.63	1022.43	1083.03	755.26	1221.67	1187.62	1180.99	71.05	888.94	1352.33	1103.96	1168.04	1195.65	926.99	1134.1	1000.11	1056.53
62.2	3	41.83	47.25	20.83	32.27	37.37	32.01	32.4	56.44	22.49	26.86	38.46	28.11	31.39	30.35	27.89	51.04	39.96	46.36	29.18	36.84	40.33	21.29	30.26	34.31	16.59
62.2	5	848.8	1256.72	947.45	1258.01	995.34	1075.55	1141.21	1213.76	1120.23	1015.97	1073.82	749.27	1215.03	1181.17	1175.72	69.6	879.57	1342.8	1099.27	1159.5	1187.15	923.34	1128.74	990.62	1052.14
62.4	3	40.17	45.27	21.11	32.02	35.94	30.84	31.62	57.44	23.02	25.88	38	28.48	30.68	32.18	27.45	51.71	38.46	47.04	29.51	36.11	40.1	20.96	29.46	34.41	17.75
62.4	5	838.29	1246.64	940.92	1248.87	985.11	1066.04	1132.95	1204.06	1109.94	1006.52	1062.47	741.85	1206.75	1173.25	1168.77	68.15	869.99	1329.85	1091.44	1149.15	1176.05	917.61	1121.35	980.1	1046.39
62.6	3	39.12	45.21	21.22	32.66	34.74	30.5	31.04	59.13	23.29	26.15	37.37	28.67	30.95	33.3	29.88	52.07	38.5	47.76	31.36	35.75	39.96	22.41	29.93	34.03	18.63
62.6	5	831.4	1240.36	938.95	1243.54	978.13	1059.79	1127.49	1197.2	1103.24	999.77	1055.22	737.03	1201.33	1168.64	1165.41	68.09	863.33	1323.3	1088.37	1143.67	1169.46	915.03	1118.14	974.13	1043.05
62.8	3	38.69	45.7	21.43	32.73	34.25	30.85	31.01	61.6	23	26.16	37.47	29.45	31.68	33.75	29.07	52.16	38.63	47.49	32.64	34.84	40.1	23.58	30.14	33.42	18.87
62.8	5	827.05	1236.12	939.55	1241.98	973.55	1056.87	1124.87	1193.35	1101.82	996.35	1051.23	733.18	1199.59	1166.76	1164.88	68.39	860.61	1321.51	1088.41	1141.75	1166.71	914.23	1117.8	971.6	1042.58
63	3	37.8	46.61	21.49	31.77	34.56	29.72	31.39	63.37	22.81	26.46	35.79	28.72	31.66	32.23	29.39	51.33	38.28	47.74	32.65	35.07	39.63	25.45	30.39	33.18	19.76
63	5	821.19	1230.97	937.85	1238.86	968.05	1052.55	1121.18	1188.62	1099.86	992.22	1046.47	728.74	1196.07	1163.97	1162.66	67.65	855.48	1315.87	1086.75	1138.93	1160.04	913.08	1114.44	967.38	1041.22
63.2	3	36.85	46.45	22.89	30.49	34.24	28.53	31.53	64.17	22.4	27.09	35.29	28.47	32.3	31.07	29.43	50.66	39.35	47.61	32.5	35.58	40.28	26.23	30.56	32.75	20.28
63.2	5	819.97	1229.52	937.2	1238.85	964.92	1051.7	1119.95	1186.26	1099.06	990.95	1043.25	726.09	1195.35	1163.04	1164.81	67.62	853.87	1314.57	1088.05	1137.06	1157.51	913.34	1114.64	964.41	1042.47
63.4	3	37.43	45.88	23.57	30.77	34.34	29.67	32.8	67.2	21.24	27.8	36.53	28.35	32.48	31.16	29.26	48.28	39.16	48.13	32.87	35.85	40.28	26.92	31.86	31.57	20.91
63.4	5	814.64	1222.07	933.33	1232.21	958.15	1045.48	1114.15	1181.04	1093.78	985.39	1035.24	720.31	1188.03	1156.25	1161.62	66.58	847.82	1306.56	1084.02	1130.4	1148.65	909.61	1109.89	957.43	1037.45
63.6	3	37.35	45.02	23.67	31.78	34.11	30.11	32.82	69.01	20.54	28.46	37.23	26.94	32.14	29.72	30.47	48.5	39.79	47.92	33.77	35.92	40.22	26.78	33.23	30.94	20.59
63.6	5	808.93	1215.38	930.16	1226.43	949.46	1038.81	1106.66	1173.76	1087.67	979.85	1027.82	713.82	1179.68	1149.57	1156.17	65.64	841.08	1297.63	1078.4	1122.88	1140.17	905.43	1104.1	947.77	1033.11
63.8	3	38.1	43.46	23.96	31.35	33.8	30.37	33.6	69.48	20.46	27.72	38.46	27.81	31.87	30.19	30.81	49.24	39.09	46.65	33.92	36.39	40.11	27.17	33.14	30.98	21.22
63.8	5	800.33	1202.99	923.32	1215.84	938.44	1028.62	1097.6	1162.7	1078.22	970.39	1016.35	706.78	1168.01	1137.45	1146.58	63.95	831.24	1283.87	1069.2	1110.94	1127.63	898.31	1094.48	936.88	1025.41
64	3	37.32	41.11	25.23	31.35	32.68	29.82	33.56	71.78	21.52	26.91	38.18	27.34	32.05	29.96	32.72	48.2	38.85	45.2	34.35	36.48	39.7	27.41	33.02	30.36	21.07
64	5	791.35	1192.13	916.14	1205.97	928.89	1018.84	1089.16	1151.1	1069.31	960.67	1005.79	699.63	1158.37	1129.05	1138.8	62.93	823.01	1271.4	1061	1099.2	1115.57	892.28	1086.48	927.52	1018.8
64.2	3	37.18	41.04	26.04	32.65	32.62	30.73	33.16	74.75	23.97	28.44	38.77	26.92	32.54	31.4	36.2	48.46	38.65	45.03	35.64	36.63	40.82	28.51	33.21	31.55	21.35
64.2	5	786.84	1185.45	913.98	1201.73	924.52	1014.65	1085.9	1146.01	1067.28	957.28	1001.55	696.78	1155.02	1124.75	1135.15	63.58	817.79	1265.52	1058.6	1093.94	1110.69	890.43	1083.93	923.8	1016.56

## Sheet: Melting curve Results
Sample Group:	Default		Show channel:
Smoothing:	ON		Ch 1	No
Smoothing window:	9		Ch 2	No
Low limit	63.5		Ch 3	Yes
High limit	91.5		Ch 4	No
Max # of peaks:	1		Ch 5	Yes
Peak threshold:	10
Slope Correction:	Yes
Derivative:	Negative
Well	Replicate	Fluorophore	Sample Type	Sample Name	Target	Melt Temp 1	Peak Height 1	FW/HM Peak 1	Area Peak 1	Melt Temp 2	Peak Height 2	FW/HM Peak 2	Area Peak 2	Melt Temp 3	Peak Height 3	FW/HM Peak 3	Area Peak 3	Melt Temp 4	Peak Height 4	FW/HM Peak 4	Area Peak 4	Description
A01-Ch3		ROX	Unknown		AGO16	88.7100000000001	35.5365733842444	0.977018488192745	36.9553528532317	0	0	0	0	0	0	0	0	0	0	0	0
A01-Ch5		SYBR	Unknown		AGO16	81.6	436.326740251984	1.7132373938639	795.661597037735	0	0	0	0	0	0	0	0	0	0	0	0
A02-Ch3		ROX	Unknown		AGO16	80.4	27.2032241456219	0.524146578012407	15.1765185644035	0	0	0	0	0	0	0	0	0	0	0	0
A02-Ch5		SYBR	Unknown		AGO16	81.6799999999999	587.643100358016	1.78859499537984	1118.72843120446	0	0	0	0	0	0	0	0	0	0	0	0
A03-Ch3		ROX	Unknown		AGO16	82.24	11.2745168007942	0.433588805955648	5.20325412054001	0	0	0	0	0	0	0	0	0	0	0	0
A03-Ch5		SYBR	Unknown		AGO16	81.4999999999999	441.210993189263	1.76476557142201	828.766847591039	0	0	0	0	0	0	0	0	0	0	0	0
A04-Ch3		ROX	Unknown		AGO16	88.7899999999998	17.8834314616873	1.20575234125578	22.9513370708491	0	0	0	0	0	0	0	0	0	0	0	0
A04-Ch5		SYBR	Unknown		AGO16	81.22	630.342150864378	1.76727288666952	1185.71137598283	0	0	0	0	0	0	0	0	0	0	0	0
A05-Ch3		ROX	Unknown		AGO16	83.97	26.4626527568361	0.283682368040085	7.99762478355985	0	0	0	0	0	0	0	0	0	0	0	0
A05-Ch5		SYBR	Unknown		AGO16	81.4899999999999	475.640849602387	1.85114491288012	937.170450920462	0	0	0	0	0	0	0	0	0	0	0	0
A06-Ch3		ROX	Unknown		AGO16	88.43	29.7987271127073	0.390623378652334	12.3895523746883	0	0	0	0	0	0	0	0	0	0	0	0
A06-Ch5		SYBR	Unknown		AGO16	81.4499999999999	557.908169720627	1.58169507968011	939.257144836354	0	0	0	0	0	0	0	0	0	0	0	0
A07-Ch3		ROX	Unknown		AGO16	80.59	28.6685797208373	0.262317092657089	8.03783838721838	0	0	0	0	0	0	0	0	0	0	0	0
A07-Ch5		SYBR	Unknown		AGO16	81.59	601.359358947993	1.56979770766259	1004.79343196865	0	0	0	0	0	0	0	0	0	0	0	0
A08-Ch3		ROX	Unknown		AGO16	67.5099999999999	217.747904468955	0.933755596298911	216.414434727601	0	0	0	0	0	0	0	0	0	0	0	0
A08-Ch5		SYBR	Unknown		AGO16	81.6	615.291217473785	1.68284569389413	1102.10769485812	0	0	0	0	0	0	0	0	0	0	0	0
A09-Ch3		ROX	Unknown		AGO16	83.97	14.3089083214713	0.261631463384628	3.99530307409989	0	0	0	0	0	0	0	0	0	0	0	0
A09-Ch5		SYBR	Unknown		AGO16	81.39	495.289284091599	1.94931269398418	1027.63636791625	0	0	0	0	0	0	0	0	0	0	0	0
A10-Ch3		ROX	Unknown		AGO16	88.5200000000001	20.480103149232	0.595648595009744	12.9843820049655	0	0	0	0	0	0	0	0	0	0	0	0
A10-Ch5		SYBR	Unknown		AGO16	81.22	645.5513476634	1.36566621393193	938.370573195259	0	0	0	0	0	0	0	0	0	0	0	0
A11-Ch3		ROX	Unknown		AGO16	74.3000000000001	278.173301947858	0.570148560239375	168.811683259443	0	0	0	0	0	0	0	0	0	0	0	0
A11-Ch5		SYBR	Unknown		AGO16	81.45	509.289151073537	1.86807188100249	1012.64455283051	0	0	0	0	0	0	0	0	0	0	0	0
A12-Ch3		ROX	Unknown		AGO16	82.13	24.4050501036152	0.388807835572958	10.0998052580617	0	0	0	0	0	0	0	0	0	0	0	0
A12-Ch5		SYBR	Unknown		AGO16	81.29	388.900919159513	1.74839247476358	723.73057583912	0	0	0	0	0	0	0	0	0	0	0	0
A13-Ch3		ROX	Unknown		AGO16	83.98	25.2419720106729	0.227073147296906	6.20124526810785	0	0	0	0	0	0	0	0	0	0	0	0
