# Supplementary material for: Genome-wide identification of gene families related to miRNA biogenesis in Mangifera indica L. and their possible role during heat stress
Source: PeerJ. 2024 Jul 17;12:e17737. doi: 10.7717/peerj.17737 (PMC11260077; doi:10.7717/peerj.17737)
Supplement: Supplemental Information 29 [file peerj-12-17737-s029.xlsx]

## Sheet: General Info
General Info
Ord File Name	C:\Users\Propietario\Documents\Andrés\Corrida final Tratados AGO16 14 jul 2018.ord
Software Version	2.2.250.602
Instrument Name	PR0961400539
Instrument Serial	PR0961400539
Instrument Version	PCR 2.3.2, RT 1.1.12.23
Used Data Step	1
Sample Group	Default
Protocol Log	StartTime: 14/07/2018 02:38:48 p.m.
	RunTime: 01:20:53
	Path: /SHARED/PCPTP
	No errors

## Sheet: Plate
Well	Fluorophore	Sample Type	Target	Description	Quantity	AD Std Value	Replicate	Sample Name		Sample Group	Default
A01-Ch1	[none]	[none]			0						A1
A01-Ch2	[none]	[none]			0						A2
A01-Ch3	[none]	[none]			0						A3
A01-Ch4	[none]	[none]			0						A4
A01-Ch5	[none]	[none]			0						A5
A02-Ch1	[none]	[none]			0						A6
A02-Ch2	[none]	[none]			0						A7
A02-Ch3	[none]	[none]			0						A8
A02-Ch4	[none]	[none]			0						A9
A02-Ch5	[none]	[none]			0						A10
A03-Ch1	[none]	[none]			0						A11
A03-Ch2	[none]	[none]			0						A12
A03-Ch3	[none]	[none]			0						A13
A03-Ch4	[none]	[none]			0						A14
A03-Ch5	[none]	[none]			0						A15
A04-Ch1	[none]	[none]			0						A16
A04-Ch2	[none]	[none]			0						B1
A04-Ch3	[none]	[none]			0						B2
A04-Ch4	[none]	[none]			0						B3
A04-Ch5	[none]	[none]			0						B4
A05-Ch1	[none]	[none]			0						B5
A05-Ch2	[none]	[none]			0						B6
A05-Ch3	[none]	[none]			0						B7
A05-Ch4	[none]	[none]			0						B8
A05-Ch5	[none]	[none]			0						B9
A06-Ch1	[none]	[none]			0						B10
A06-Ch2	[none]	[none]			0						B11
A06-Ch3	[none]	[none]			0						B12
A06-Ch4	[none]	[none]			0						B13
A06-Ch5	[none]	[none]			0						B14
A07-Ch1	[none]	[none]			0						B15
A07-Ch2	[none]	[none]			0						B16
A07-Ch3	[none]	[none]			0						C1
A07-Ch4	[none]	[none]			0						C2
A07-Ch5	[none]	[none]			0						C3
A08-Ch1	[none]	[none]			0						C4
A08-Ch2	[none]	[none]			0						C5
A08-Ch3	[none]	[none]			0						C6
A08-Ch4	[none]	[none]			0						C7
A08-Ch5	[none]	[none]			0						C8
A09-Ch1	[none]	[none]			0						C9
A09-Ch2	[none]	[none]			0						C10
A09-Ch3	[none]	[none]			0						C11
A09-Ch4	[none]	[none]			0						C12
A09-Ch5	[none]	[none]			0						C13
A10-Ch1	[none]	[none]			0						C14
A10-Ch2	[none]	[none]			0						C15
A10-Ch3	[none]	[none]			0						C16
A10-Ch4	[none]	[none]			0						D1
A10-Ch5	[none]	[none]			0						D2
A11-Ch1	[none]	[none]			0						D3
A11-Ch2	[none]	[none]			0						D4
A11-Ch3	[none]	[none]			0						D5
A11-Ch4	[none]	[none]			0						D6

## Sheet: Protocol
Reaction volume	10		Channel in use:
Consumable	1		Ch 1	No
Ramp rate	7		Ch 2	No
Heated lid ON	True		Ch 3	Yes (ROX)
Heated lid temperature	105		Ch 4	No
			Ch 5	Yes (SYBR)
	No	Cycle	Type	Information
	1		Temperature	Temp.: 95°C; Time:07:00
	2		Cycle	Number of cycles to loop:40; Number of steps inside loop:2
	3	*	. Temperature	Temp.: 95°C; Time:00:05
DA	4	*	. Temperature	Temp.: 60°C; Time:00:30; Data acquisition:True
	5		Temperature	Temp.: 60°C; Time:00:30
	6		Melting Curve	Start temperature:60°C; End temperature:95°C; Hold time:00:01; Temperature increment after hold:0.2°C
	7		Temperature	Temp.: 20°C; Time:00:10

## Sheet: Acquired Data 1
Data step:	4			Show channel:	Thresholds:
Sample Group:	Default		Ch 1	No
Method:	Threshold		Ch 2	No
Smoothing:	ON		Ch 3	Yes	297.56
Smoothing window:	5		Ch 4	No
Baseline:	Trend		Ch 5	Yes	110.55
Baseline range start:	3
Baseline range end:	7
Channel	Cycle	Temp	A1	A2	A3	A4	A5	A6	A7	A8	A9	A10	A11	A12	A13	A14	A15	A16	B1	B2	B3	B4	B5	B6	B7	B8
3	1	60	11.2	7.15	6.87	0	13.11	0	4.08	0	0	0	0	-14.14	3.33	8.75	5.28	9.89	1.41	3.19	9.47	12.57	4.22	12.24	12.55	2.45
5	1	60	42.21	36.13	35.67	25.42	32.43	22.36	30.62	47.58	8.95	0	0	3.5	39	36.09	32.05	-0.28	9.57	57.68	56.3	45.36	64.47	52.65	70.53	24.34
3	2	60	11.66	7.17	7.71	1.69	8.59	4.54	-4.17	46.88	1.27	4.2	3.99	-5.84	1.39	4.9	1.88	10.62	3.14	0.87	7.43	7.18	3.96	7.24	5.38	3.2
5	2	60	52.36	46.21	38.21	40.66	37.01	38.93	40.23	55.04	26.7	32.96	27.38	17.74	43.37	42.62	33.95	0.53	25.47	49.05	46.93	44.95	60.41	50.86	63.34	33.05
3	3	60	12.36	7.11	7.54	3.15	7.25	7.02	-7.78	81.6	2.46	7.27	7.14	-1.72	1.22	3.3	1.01	9.2	3.9	0.12	5.42	4.54	3.94	4.72	1.47	4.07
5	3	60	57.55	52.61	41.35	50.64	38.7	49.85	47.09	60.04	38.86	56.38	45.47	27.84	47.67	49.75	38.07	0.64	33.8	43.7	40.91	46.46	57.68	49.44	58.2	37.08
3	4	60	13.3	7.98	5.63	4.89	10.62	6.12	-4.33	114.15	4.55	10.06	9.11	-3.91	4.82	4.17	5.17	5.11	3.28	1.3	3.6	5.85	5.35	6.39	2.09	4.44
5	4	60	58.16	57.28	47.72	58.19	38.13	56.25	53.83	66.44	47.19	70.97	56.45	34.97	53.45	61.46	48.64	-0.23	34.27	46.14	40.75	53.66	57.15	51.54	57.8	36.38
3	5	60	15.88	7.09	7.95	5.94	9.56	8.5	-2.32	111.53	5.23	10.54	10.04	-5.15	4.65	5.18	4.27	1.18	3.54	2.43	3.09	6.37	3.81	6.84	3.69	6.99
5	5	60	47.2	47.74	40.08	45.82	27.11	49.22	45.2	53.75	38.68	66.83	46.22	27.7	48.38	54.89	43.66	-1.06	21.92	34.69	32.06	43.21	49.88	39.66	45.08	25.07
3	6	60	11.4	8.7	8.21	2.8	7.31	9.38	-4.31	92.98	6.67	9.77	10.53	-7.21	1.67	5.15	3.31	1.23	2.85	4.73	0	3.98	4.71	4.37	4.35	7.4
5	6	60	37.96	40.86	33.88	35.82	19.49	41.25	39.41	43.14	29.57	64.14	40.2	22.7	43.94	44.85	38.12	-0.72	15.26	26.25	22.83	35.07	44.43	32.14	38.24	17.51
3	7	60	8.4	8.82	8.75	3.63	1.79	8.75	-7.36	87.31	8.86	9.87	9.82	-8.58	0.02	4.34	2.95	4.67	0.33	2.94	1.7	0	5.4	1.47	3.79	4.46
5	7	60	18.75	22.71	15.77	18.41	1.21	25.51	20.52	20.48	13.93	49.91	22.18	8.36	23.1	20.9	17.1	1.12	0	6.26	7.03	13.69	23.43	15.39	16.98	0
3	8	60	6.63	8.21	6.43	4.35	6.59	7.68	-7.44	83.95	9.02	10	10.04	-8.11	1.87	5.7	7.51	6.93	1.3	1.12	2.82	0.52	6.98	0.53	3.04	3.11
5	8	60	13.17	16.71	14.38	19.66	0	24.91	18.43	17.76	16.54	50.26	21.37	9.77	22.51	18.86	16.85	9.11	1.54	6.47	5.79	15.67	19.84	16.95	15.69	2.32
3	9	60	7.71	5.36	4.68	4.9	5.99	7.99	-8.59	81.86	7.38	8.16	10.38	-6.36	2.66	2.3	5.07	5.59	1.55	0	3.33	3.49	4.08	0.89	5	4.54
5	9	60	14.6	21.19	20.49	26.68	7.71	30.56	24.36	22.73	22.57	54.12	24.55	12.88	28.37	25.62	29.4	27.46	11.77	14.49	11.46	23.17	25.38	22.33	22.31	13.38
3	10	60	8.05	7.05	4.4	5.25	5.54	8.48	-8.04	83.7	8.17	7.58	8.43	-4.7	4.4	1.23	5.87	1.7	1.61	1.87	1.94	5.8	5.25	0.92	6.75	6.73
5	10	60	15.95	23.17	22.48	27.19	11.14	30.05	26.31	27.21	23.49	55.86	26.46	12.75	31.58	31.45	33.38	61.23	17.49	18.01	15.5	27.04	28.77	24.06	24.6	20.91
3	11	60	9.73	9.03	5.59	9.04	4.69	6.87	-5.58	89.75	8.97	9.08	9.64	-5.2	7.97	2.34	5.49	4.93	1.27	1.45	3.69	7.05	5.64	4.21	7.28	7.21
5	11	60	9.29	14.6	15.39	19.17	5.25	22.96	16.21	18.68	16.08	48.37	18.46	6.87	18.29	23.15	23.48	121.5	15.93	7.98	9.78	18.6	18.74	14.32	14.01	15.18
3	12	60	9.95	12.73	8.42	12.2	7.95	9.05	-1.81	100.56	11.12	12.9	12.16	-3.53	10.03	4.88	7.35	11.93	4.17	2.3	5.8	7.65	8.43	5.85	5.57	7.02
5	12	60	8.6	10.29	13.29	18.19	6.21	21.74	11.46	18.11	13.48	46.33	19.79	6.89	17.64	19.87	18.8	221.69	15.03	8.37	7.83	14.26	16.94	12.44	11.5	16.05
3	13	60	7.11	8.72	7.85	9.48	6.45	8.68	-4.31	106.02	9.09	11.92	12.72	-3.11	6.37	4.63	4.09	11.48	3.97	5.61	5.59	9.19	6.59	6.09	5.35	5.42
5	13	60	8.4	9.06	11.61	14.49	10.11	18.11	9.3	15.27	10.43	43.16	16.65	6.82	14.14	12.46	15.99	354.75	17.99	9.44	5.74	9.56	12.43	11.06	9.91	17.36
3	14	60	6.36	8.25	6.61	8.42	4.85	10.06	-6.64	114.42	7.91	12.67	9.92	-2.6	3.1	7.65	7.51	9.96	3.68	6.56	5.52	7.56	5.48	4.34	5.15	5.69
5	14	60	1.61	2.85	3.14	4.66	5.81	8.23	3.97	6.68	2.89	35.22	8.58	1.67	5.1	4.99	5.52	498.58	14.41	3.59	2.05	4.88	5.36	4.11	1.68	13.75
3	15	60	3.21	6.85	4.91	6.03	5.23	10.44	-5.63	118.81	7.24	8.81	6.16	-6.48	3.03	7.37	5.41	8.09	3.35	1.9	7.28	5.55	2.09	4.72	7.75	5.31
5	15	60	0	0	0	0	4.32	3.31	0	0	0	30.59	2.68	0	0	0	0	633.68	16.31	0	0	0	0	0	0	11.03
3	16	60	3.96	7.15	5.43	6.92	4.81	13.63	-2.28	130.17	7.61	9.31	5.46	-7.47	5.84	6.54	8.22	10.68	1.58	0.09	7.46	3.4	0	0	7.25	5.05
5	16	60	7.77	5.66	4.21	10.25	9.49	8.68	4.02	5.56	6.87	37.89	8.34	3.92	7.46	7.49	5.68	749.81	20.78	2.29	5.14	2.57	5.98	3.85	6.74	17.74
3	17	60	7.74	6.6	8.14	8.51	6.22	12.09	-1.73	143.09	7.29	10.77	10.74	-8.19	7.99	6.33	10.08	10.57	0	4.44	7.76	5.5	0.08	1.65	6.85	3.87
5	17	60	12.1	6.22	4.42	15.1	13.3	10.29	4.25	7.54	10.66	41.55	9.28	5.79	13.03	13.77	12.88	835.7	25.72	4.18	7.48	3.2	5.85	6.22	10.69	24.48
3	18	60	11.56	10.23	11.23	14.22	8.26	12.32	-0.29	161.09	12.26	17.51	14.78	-4.56	7.08	12	14.15	14.61	6.98	9.06	9.66	8.68	6.26	8.92	10.21	6.04
5	18	60	20.37	11.15	7.28	15.42	18.5	14.61	10.98	17.05	13.65	50.59	13.58	8.59	19.7	22.06	21.18	892.03	32.46	12.81	12.84	13.45	15.39	7.72	11.08	32.54
3	19	60	9.8	12.27	12.85	16.51	9.75	12.3	0.21	177.94	15.52	13.36	17.21	-0.48	6.26	13.51	11.99	14.22	12.34	8.13	13.19	13.25	12.73	11.97	10.72	8.67
5	19	60	27.41	18.12	12.48	18.61	25.45	18.47	18.72	25.22	19.46	40.22	18.78	10.58	27.41	28.11	27.79	931.46	41.4	21.2	15.44	19.58	23.39	12.07	14.06	36.3
3	20	60	12.75	13.73	11.67	18.69	7.22	12.87	-0.04	191.11	14	11.94	14.29	2.49	6.51	12.5	10.5	17.73	10.18	7.2	12.85	12.64	12.82	9.84	10.02	9.48
5	20	60	32.02	23.8	16.83	26.82	30.98	21.04	28.58	32.2	28.3	45.58	25.31	14.28	31.76	31.07	31	958.19	47.28	26.67	19.26	23.23	32.31	16.73	18.2	39.68
3	21	60	13.97	12.61	9.44	14.7	6.06	10.46	-2.25	197.86	8.11	12.14	15.5	2.16	8.39	7.58	5.28	15.41	5.24	7.54	7.98	9.8	10.85	7.15	7.15	7.35
5	21	60	27.6	20.4	13.36	32.13	27.23	14.35	30.44	28.22	30.4	53.29	23.51	13.43	24.87	24.67	25.84	966.25	44.8	26.93	20.36	16.31	30.35	13.75	19.29	36.28
3	22	60	8.62	10.13	7.48	12.77	4.55	9.91	-1.67	195.37	8.07	13.14	14.53	-0.96	5.18	4.23	2.57	12.66	6.74	7.61	6.5	5.76	7.57	5.8	7.27	4.86

## Sheet: Cq Results
Data step:	4			Show channel:	Thresholds:
Sample Group:	Default		Ch 1	No
Method:	Threshold		Ch 2	No
Smoothing:	ON		Ch 3	Yes	297.56
Smoothing window:	5		Ch 4	No
Baseline:	Trend		Ch 5	Yes	110.55
Baseline range start:	3
Baseline range end:	7
Well	Replicate	Fluorophore	Sample Type	Sample Name	Target	Cq	Quantity	Omitted	Description
A01-Ch3		[none]	[none]			NeuN	0
A01-Ch5		[none]	[none]			NeuN	0
A02-Ch3		[none]	[none]			NeuN	0
A02-Ch5		[none]	[none]			NeuN	0
A03-Ch3		[none]	[none]			NeuN	0
A03-Ch5		[none]	[none]			NeuN	0
A04-Ch3		[none]	[none]			NeuN	0
A04-Ch5		[none]	[none]			NeuN	0
A05-Ch3		[none]	[none]			NeuN	0
A05-Ch5		[none]	[none]			NeuN	0
A06-Ch3		[none]	[none]			NeuN	0
A06-Ch5		[none]	[none]			NeuN	0
A07-Ch3		[none]	[none]			NeuN	0
A07-Ch5		[none]	[none]			NeuN	0
A08-Ch3		[none]	[none]			NeuN	0
A08-Ch5		[none]	[none]			NeuN	0
A09-Ch3		[none]	[none]			NeuN	0
A09-Ch5		[none]	[none]			NeuN	0
A10-Ch3		[none]	[none]			NeuN	0
A10-Ch5		[none]	[none]			NeuN	0
A11-Ch3		[none]	[none]			NeuN	0
A11-Ch5		[none]	[none]			NeuN	0
A12-Ch3		[none]	[none]			NeuN	0
A12-Ch5		[none]	[none]			NeuN	0
A13-Ch3		[none]	[none]			NeuN	0
A13-Ch5		[none]	[none]			NeuN	0

## Sheet: Melt Curve Data
Sample Group:	Default		Show channel:
Smoothing:	ON		Ch 1	No
Smoothing window:	9		Ch 2	No
Low limit	63.5		Ch 3	Yes
High limit	91.5		Ch 4	No
Max # of peaks:	1		Ch 5	Yes
Peak threshold:	10
Slope Correction:	Yes
Derivative:	Negative
Temp	Channel	A1	A2	A3	A4	A5	A6	A7	A8	A9	A10	A11	A12	A13	A14	A15	A16	B1	B2	B3	B4	B5	B6	B7	B8	B9
60	3	31.82	30.67	1.86	21.8	23.52	14.18	43.33	131.31	5.51	6.47	30.09	63.06	11.77	17.77	0.23	12.61	37.9	25.19	12.22	15.06	27.37	4.78	12.9	19.74	0.1
60	5	891.96	1246.65	897.24	1105.58	955.6	871.1	1046.03	1158.51	890.49	967.7	1082.49	684.94	1159.5	1159.1	1055.12	1079.09	939.34	1298.46	1025.23	1163.87	1195.08	912.82	1071.42	1040.69	1029.68
60.2	3	29.3	28.42	1.13	22.44	21.16	14.68	44.36	130.85	5.06	6.87	26.88	60.84	11.54	16.45	0.04	13.11	35.21	26.76	11.1	16.28	25.81	3.16	9.74	18.68	0
60.2	5	894.03	1249.37	901.3	1110.13	954.22	874.34	1052.19	1162.71	894.74	972.16	1086.43	684.1	1163.32	1161.59	1059.82	1081.68	939.84	1301.52	1031.15	1169.88	1199.86	917.34	1076.4	1039.46	1031.56
60.4	3	27.48	26.8	0.81	23.1	19.17	15.14	45.62	129.15	4.98	7.5	24.53	59.44	11.45	15.42	0	13.78	33.15	27.99	10.4	17.33	24.63	2.14	7.43	17.73	0.03
60.4	5	894.44	1251.17	904.5	1113.68	952.3	876.65	1056.91	1165.76	898.12	975.55	1088.96	682.95	1165.92	1163.28	1063.59	1082.81	939.24	1303.3	1035.84	1174.51	1203.01	920.95	1080.37	1037.58	1032.99
60.6	3	26.35	25.81	0.91	23.79	17.54	15.55	47.1	126.19	5.26	8.35	23.04	58.86	11.5	14.66	0.12	14.62	31.71	28.88	10.12	18.21	23.81	1.72	5.97	16.88	0.19
60.6	5	893.2	1252.03	906.86	1116.22	949.85	878.02	1060.19	1167.66	900.63	977.87	1090.07	681.5	1167.31	1164.17	1066.44	1082.49	937.57	1303.79	1039.29	1177.75	1204.53	923.64	1083.34	1035.02	1033.98
60.8	3	25.92	25.46	1.43	24.49	16.27	15.91	48.82	121.97	5.92	9.43	22.41	59.1	11.68	14.19	0.41	15.62	30.9	29.43	10.26	18.93	23.35	1.9	5.36	16.12	0.48
60.8	5	890.31	1251.97	908.36	1117.76	946.86	878.47	1062.03	1168.42	902.27	979.13	1089.76	679.74	1167.49	1164.26	1068.36	1080.71	934.8	1303	1041.51	1179.6	1204.41	925.42	1085.31	1031.8	1034.52
61	3	26.72	25.81	2.69	23.92	15.07	15.23	49.66	113.66	7.09	10.52	22.33	59.87	12.32	13.62	0.78	16.83	30.13	27.9	10.21	18.89	22.47	2.4	5.44	15.16	0.49
61	5	884.54	1250.97	909	1117.52	942.48	876.53	1061.58	1166.81	901.78	978.26	1086.16	677.9	1165.86	1162.26	1068.97	1075.03	929.65	1300.39	1041.68	1179.33	1202.25	925.03	1085.79	1027.12	1033.53
61.2	3	26.43	26.36	3.32	25.25	14.09	14.04	52.33	106.12	8.27	11.15	24.58	62.03	10.56	13	0.7	15.86	30.76	28.05	10.92	18.77	22.73	4.04	5.63	13.91	0.97
61.2	5	878.97	1248.99	909.53	1117.69	937.79	876.07	1060.5	1165.61	902.44	977.15	1083.32	674.89	1162.19	1159.8	1067.3	1070.6	924.32	1297.67	1041.06	1177.58	1198.1	925.3	1084.83	1022.67	1033.05
61.4	3	28.5	27.97	4.95	27.5	14.52	16.76	55.71	101.79	9.7	12.63	25.44	65.96	12.09	13.97	2.13	18.07	31.72	29.28	12.36	19.4	24.38	5.77	8.93	13.8	2.73
61.4	5	872.57	1245.35	907.96	1116.18	933.38	874.56	1058.3	1163.79	901.66	976.34	1079.9	671.91	1159.31	1159.03	1066.86	1066.76	920.34	1293.07	1041.56	1176.89	1193.03	925.47	1083.41	1017.07	1033.48
61.6	3	28.86	29.27	5.82	29.3	15.61	19.59	59.36	97.88	11.21	15.24	27.63	68.14	13.68	15.73	5.17	20.46	33.11	30.48	15.44	20.09	25.88	8.3	11.49	14.89	4.31
61.6	5	865.53	1242.08	906.69	1114.81	929.76	872.5	1057.21	1161.85	901.33	975.81	1077.01	669.11	1155.81	1157.95	1066.38	1064.04	915.18	1287.7	1041.28	1173.9	1189.55	925.25	1082.84	1012.07	1033.32
61.8	3	29.15	29.44	6.98	30.55	17.4	21.77	63.03	93.63	12.83	16.25	27.56	70.03	15.74	17.56	6.36	19.99	32.97	31.72	17.51	21.94	25.49	10.3	11.47	15.56	4.25
61.8	5	860.29	1239.51	906.11	1115.01	927.23	871.78	1055.31	1159.78	901.59	976.29	1074.99	665.73	1155.55	1157.27	1067.57	1060.67	913.33	1285.63	1043.06	1171.8	1186.9	926.25	1083.08	1008.07	1033.26
62	3	29.38	30.15	7.65	33.1	18.22	23.03	67.69	89.52	14.47	17.08	27.76	72.65	16.42	19.42	7.28	19.98	33.62	33.56	19.47	23.09	25.68	11.54	11.94	16.65	5.98
62	5	855.66	1235.59	906.19	1115.43	924.41	870.34	1056.04	1156.98	901.3	975.57	1072.28	663.38	1153.87	1155.37	1068.88	1058.02	909.1	1281.82	1044.07	1169.02	1183.51	926.36	1083.26	1003.86	1034.14
62.2	3	27.84	31.13	6.66	33.77	17.06	21.91	71.17	84.45	15.14	16.42	26.57	75.08	17.46	19.66	8.11	20.14	31.69	33.53	18.7	22.94	25.35	11.34	10.92	15.25	6.52
62.2	5	852.95	1232.24	907.09	1113.98	919.66	867.83	1053.99	1154.09	900.49	973.4	1067.97	659.4	1151.14	1152.84	1068.12	1054.1	905.45	1278.58	1044.71	1166.12	1179.13	926.49	1082.34	999.35	1033
62.4	3	27.21	32.04	7.74	36.01	17.58	21.54	76.88	79.37	17.42	17.4	27.13	78.95	18.41	19.94	9.47	23.01	31.92	33.38	18.11	23.81	25	11.83	11.42	14.86	8.13
62.4	5	852.22	1229.92	907.9	1114.03	915.74	867.57	1053.98	1152.94	902.85	972.82	1064.49	657.13	1149.78	1150.85	1068.6	1048.81	901.75	1275.09	1046.32	1163.64	1176.67	928.64	1082.36	996.87	1033.17
62.6	3	27.89	33.58	9.36	36.22	17.35	19.79	82.74	74.93	18.22	18.61	26.89	83.58	19.2	20.71	9.04	24.74	31.86	34.71	19.05	24.42	25.26	11.96	12.45	15.72	8.55
62.6	5	848.53	1224.01	907.11	1111.11	910.34	865.21	1051.02	1147.4	901.7	968.91	1059.51	653.75	1146.59	1146.9	1066.49	1041.03	896.49	1268.55	1043.4	1158.79	1171.43	928.07	1080.73	991.92	1031.86
62.8	3	27.06	32.25	10.02	38.36	17.09	19.41	88.31	71.26	18.15	18.5	27.65	91.22	17.82	20.21	10.1	23.92	32.04	36.05	19.57	25.11	25.65	12.27	12.73	16.09	8.24
62.8	5	843.85	1215.94	904.63	1106.47	902.42	861.68	1045.93	1140.39	898.67	962.51	1051.69	648.48	1139.78	1140.28	1061.37	1032.38	888.31	1261.39	1038.15	1150.69	1162.84	926.18	1075.32	985.51	1029.13
63	3	27.29	32.15	10.57	39.46	15.58	20.91	95.34	69.22	17.64	18.88	27.6	101.03	17.85	19.59	10.66	23.59	31.71	36.84	19.19	25.13	25.21	12.25	14.53	16.98	8.63
63	5	835.67	1203.54	900.04	1097.4	893.27	855.15	1036.55	1130.18	891.49	953.1	1041.72	642.12	1131.22	1131.65	1054.02	1021.24	879.02	1248.69	1032.66	1142.13	1151.32	920.54	1067.32	975.36	1023.24
63.2	3	26.81	30.92	10.67	39.99	15.5	21.84	103.75	66.92	17.61	17.65	28.37	110.76	18.46	18.91	9.92	23.43	31.19	36.09	19.01	25	24.49	12.63	14.52	17.77	8.25
63.2	5	826.23	1189.97	893.63	1088.37	884.02	846.9	1027.98	1119.25	883.64	944.2	1031.24	635.72	1119.76	1119.85	1046.75	1010.57	869.21	1234.96	1025.53	1131.03	1139.12	913.62	1057.52	964.6	1016.51
63.4	3	27.09	29.36	11.21	41.12	16.41	22.2	115.32	63.04	17.6	16.96	27.76	121.92	18.58	18.63	9	23.29	29.53	35.06	19.06	24.39	23.25	13.16	13.65	18.28	9.4
63.4	5	817.88	1180.04	889.22	1080.24	876.2	840.77	1019.25	1108.69	876.7	936.61	1022.07	628.23	1110.3	1110	1039.09	998.23	862.08	1225.33	1019.09	1122.42	1129.21	908.15	1049.43	955.63	1011.03
63.6	3	26.82	26.76	11.79	41.29	14.46	21.09	132.49	59.08	18.19	15.32	26.69	133.13	16.5	17.55	8.3	22.89	27.97	33.81	19.59	23.08	22.72	12.89	12.23	17.87	9.53
63.6	5	810.94	1172.13	885.72	1073.9	870.66	835.59	1013.86	1102.31	870.89	931.22	1014.31	624.89	1103.35	1101.6	1035.59	990.03	854.41	1215.88	1015.26	1115.29	1119.97	904.63	1043.96	948.29	1009.25
63.8	3	24.98	25.43	11.49	41.05	13.3	21.26	153.49	56.04	19.12	14.05	27.38	145.97	15.75	15.81	9.44	22.59	27.31	31.21	19.39	21.49	20.43	12.19	10.85	15.57	9.83
63.8	5	806.84	1167.28	884.53	1068.61	865.44	831.39	1008.53	1098.11	866.56	927.55	1009.62	622.69	1096.84	1095.46	1033.48	983.46	851.54	1209.41	1013.09	1111.07	1115.31	902.73	1040.11	943.7	1007.29
64	3	23.31	25.04	10.25	39.79	13.2	20.14	181.67	52.77	19.71	14.04	27.45	157.99	14.19	14.21	9.53	21.66	27.1	29.07	18.6	19.67	19.61	10.72	10.63	14.63	10.57
64	5	804.2	1164.97	885.48	1067.26	862.9	829.81	1006.41	1096.84	866.76	926.31	1008.19	622.64	1094.55	1092.98	1033.14	978.27	850.1	1205.91	1012.85	1109.13	1112.61	902.89	1039.23	941.75	1009.04
64.2	3	22.34	25.14	11.25	39.85	13.73	18.73	211.38	50.58	20.09	14.75	27.44	170.19	12.81	14.4	11.14	20.69	26.9	29.08	19.95	19.68	20.09	10.47	11.62	14.15	11.53
64.2	5	801.5	1161.24	886.1	1064.81	860.18	828.45	1004.46	1093.53	865.27	923.52	1006.17	621.93	1090.78	1089.05	1031.73	973.42	847.94	1202.6	1010.67	1106.17	1110.6	902.22	1035.98	938.67	1009.27

## Sheet: Melting curve Results
Sample Group:	Default		Show channel:
Smoothing:	ON		Ch 1	No
Smoothing window:	9		Ch 2	No
Low limit	63.5		Ch 3	Yes
High limit	91.5		Ch 4	No
Max # of peaks:	1		Ch 5	Yes
Peak threshold:	10
Slope Correction:	Yes
Derivative:	Negative
Well	Replicate	Fluorophore	Sample Type	Sample Name	Target	Melt Temp 1	Peak Height 1	FW/HM Peak 1	Area Peak 1	Melt Temp 2	Peak Height 2	FW/HM Peak 2	Area Peak 2	Melt Temp 3	Peak Height 3	FW/HM Peak 3	Area Peak 3	Melt Temp 4	Peak Height 4	FW/HM Peak 4	Area Peak 4	Description
A01-Ch3		[none]	[none]			91.17	27.93295597047	0.267450418424606	7.96777634705131	0	0	0	0	0	0	0	0	0	0	0	0
A01-Ch5		[none]	[none]			84.75	559.182311003905	1.13099849656988	673.154068455558	0	0	0	0	0	0	0	0	0	0	0	0
A02-Ch3		[none]	[none]			85.81	36.5543698665625	0.243258741474152	9.55773277560764	0	0	0	0	0	0	0	0	0	0	0	0
A02-Ch5		[none]	[none]			84.76	720.299423789357	1.26924883357803	973.103115582998	0	0	0	0	0	0	0	0	0	0	0	0
A03-Ch3		[none]	[none]			0	0	0	0	0	0	0	0	0	0	0	0	0	0	0	0
A03-Ch5		[none]	[none]			84.56	512.237720521914	1.26057568707908	687.289177801513	0	0	0	0	0	0	0	0	0	0	0	0
A04-Ch3		[none]	[none]			68.85	32.1321223052396	0.991291842638143	33.9031433896917	0	0	0	0	0	0	0	0	0	0	0	0
A04-Ch5		[none]	[none]			85.29	388.614575695762	2.08398764127635	862.011872511358	0	0	0	0	0	0	0	0	0	0	0	0
A05-Ch3		[none]	[none]			90.2	23.7757587235176	0.0294375449180603	4.75515174470359	0	0	0	0	0	0	0	0	0	0	0	0
A05-Ch5		[none]	[none]			84.65	579.932548566351	1.16984495066176	722.112414960884	0	0	0	0	0	0	0	0	0	0	0	0
A06-Ch3		[none]	[none]			77.72	103.763126550868	0.542253004606068	59.8885832134103	0	0	0	0	0	0	0	0	0	0	0	0
A06-Ch5		[none]	[none]			84.66	522.078216445427	1.23123129199748	684.186089572868	0	0	0	0	0	0	0	0	0	0	0	0
A07-Ch3		[none]	[none]			65.99	31.6088225682339	1.59907562090051	53.7992651371125	0	0	0	0	0	0	0	0	0	0	0	0
A07-Ch5		[none]	[none]			85.18	465.062224417849	1.5700932784568	777.204920814876	0	0	0	0	0	0	0	0	0	0	0	0
A08-Ch3		[none]	[none]			87.41	261.954168526508	0.417680973833799	116.457960223077	0	0	0	0	0	0	0	0	0	0	0	0
A08-Ch5		[none]	[none]			84.81	646.23034614838	1.20093830749257	826.051394978527	0	0	0	0	0	0	0	0	0	0	0	0
A09-Ch3		[none]	[none]			74	11.3878284423286	0.675075861747935	8.18262254383192	0	0	0	0	0	0	0	0	0	0	0	0
A09-Ch5		[none]	[none]			85.35	322.953709296484	1.95231387435619	671.102629379129	0	0	0	0	0	0	0	0	0	0	0	0
A10-Ch3		[none]	[none]			79.31	55.3741933872984	0.555534620918334	32.7429319236837	0	0	0	0	0	0	0	0	0	0	0	0
A10-Ch5		[none]	[none]			84.44	570.537193128027	1.17805761685814	715.400954903238	0	0	0	0	0	0	0	0	0	0	0	0
A11-Ch3		[none]	[none]			73.38	78.9887580410679	0.736491654636338	61.9201697392341	0	0	0	0	0	0	0	0	0	0	0	0
A11-Ch5		[none]	[none]			84.74	619.574546318802	1.23343267564396	813.407251242358	0	0	0	0	0	0	0	0	0	0	0	0
A12-Ch3		[none]	[none]			65.98	45.3621642085554	1.3179829030002	63.6359549439852	0	0	0	0	0	0	0	0	0	0	0	0
A12-Ch5		[none]	[none]			84.58	363.397938326654	1.18205775168654	457.214691698527	0	0	0	0	0	0	0	0	0	0	0	0
A13-Ch3		[none]	[none]			68.37	20.5977661746206	0.376101307994127	8.24566593064695	0	0	0	0	0	0	0	0	0	0	0	0
