# Supplementary material for: Genome-wide identification of gene families related to miRNA biogenesis in Mangifera indica L. and their possible role during heat stress
Source: PeerJ. 2024 Jul 17;12:e17737. doi: 10.7717/peerj.17737 (PMC11260077; doi:10.7717/peerj.17737)
Supplement: Supplemental Information 30 [file peerj-12-17737-s030.xlsx]

## Sheet: General Info
General Info
Ord File Name	C:\Users\Propietario\Documents\Andrés\Hsp90.ord
Software Version	2.2.250.602
Instrument Name	PR0961400539
Instrument Serial	PR0961400539
Instrument Version	PCR 2.3.2, RT 1.1.12.23
Used Data Step	1
Sample Group	Default
Protocol Log	StartTime: 02/07/2019 03:13:10 p.m.
	RunTime: 01:21:11
	Path: /SHARED/PCPTP
	No errors

## Sheet: Plate
Well	Fluorophore	Sample Type	Target	Description	Quantity	AD Std Value	Replicate	Sample Name		Sample Group	Default
A01-Ch1	[none]	[none]			0						A1
A01-Ch2	[none]	[none]			0						A2
A01-Ch3	ROX	NTC	CONTROL		0						A3
A01-Ch4	[none]	[none]			0						A4
A01-Ch5	SYBR	NTC	CONTROL		0						A5
A02-Ch1	[none]	[none]			0						A6
A02-Ch2	[none]	[none]			0						A7
A02-Ch3	ROX	Unknown	T243		0						A8
A02-Ch4	[none]	[none]			0						A9
A02-Ch5	SYBR	Unknown	T243		0						A10
A03-Ch1	[none]	[none]			0						A11
A03-Ch2	[none]	[none]			0						A12
A03-Ch3	ROX	Unknown	T243		0						A13
A03-Ch4	[none]	[none]			0						A14
A03-Ch5	SYBR	Unknown	T243		0						A15
A04-Ch1	[none]	[none]			0						A16
A04-Ch2	[none]	[none]			0						B1
A04-Ch3	ROX	Unknown	T243		0						B2
A04-Ch4	[none]	[none]			0						B3
A04-Ch5	SYBR	Unknown	T243		0						B4
A05-Ch1	[none]	[none]			0						B5
A05-Ch2	[none]	[none]			0						B6
A05-Ch3	ROX	Unknown	T242		0						B7
A05-Ch4	[none]	[none]			0						B8
A05-Ch5	SYBR	Unknown	T242		0						B9
A06-Ch1	[none]	[none]			0						B10
A06-Ch2	[none]	[none]			0						B11
A06-Ch3	ROX	Unknown	T242		0						B12
A06-Ch4	[none]	[none]			0						B13
A06-Ch5	SYBR	Unknown	T242		0						B14
A07-Ch1	[none]	[none]			0						B15
A07-Ch2	[none]	[none]			0						B16
A07-Ch3	ROX	Unknown	T242		0						C1
A07-Ch4	[none]	[none]			0						C2
A07-Ch5	SYBR	Unknown	T242		0						C3
A08-Ch1	[none]	[none]			0						C4
A08-Ch2	[none]	[none]			0						C5
A08-Ch3	ROX	Unknown	T241		0						C6
A08-Ch4	[none]	[none]			0						C7
A08-Ch5	SYBR	Unknown	T241		0						C8
A09-Ch1	[none]	[none]			0						C9
A09-Ch2	[none]	[none]			0						C10
A09-Ch3	ROX	Unknown	T241		0						C11
A09-Ch4	[none]	[none]			0						C12
A09-Ch5	SYBR	Unknown	T241		0						C13
A10-Ch1	[none]	[none]			0						C14
A10-Ch2	[none]	[none]			0						C15
A10-Ch3	ROX	Unknown	T241		0						C16
A10-Ch4	[none]	[none]			0						D1
A10-Ch5	SYBR	Unknown	T241		0						D2
A11-Ch1	[none]	[none]			0						D3
A11-Ch2	[none]	[none]			0						D4
A11-Ch3	ROX	Unknown	T63		0						D5
A11-Ch4	[none]	[none]			0						D6

## Sheet: Protocol
Reaction volume	10		Channel in use:
Consumable	1		Ch 1	No
Ramp rate	7		Ch 2	No
Heated lid ON	True		Ch 3	Yes (ROX)
Heated lid temperature	105		Ch 4	No
			Ch 5	Yes (SYBR)
	No	Cycle	Type	Information
	1		Temperature	Temp.: 95°C; Time:07:00
	2		Cycle	Number of cycles to loop:40; Number of steps inside loop:2
	3	*	. Temperature	Temp.: 95°C; Time:00:05
DA	4	*	. Temperature	Temp.: 60°C; Time:00:30; Data acquisition:True
	5		Temperature	Temp.: 60°C; Time:00:30
	6		Melting Curve	Start temperature:60°C; End temperature:95°C; Hold time:00:01; Temperature increment after hold:0.2°C
	7		Temperature	Temp.: 20°C; Time:00:10

## Sheet: Acquired Data 1
Data step:	4			Show channel:	Thresholds:
Sample Group:	Default		Ch 1	No
Method:	Threshold		Ch 2	No
Smoothing:	ON		Ch 3	No
Smoothing window:	5		Ch 4	No
Baseline:	Trend		Ch 5	Yes	110.22
Baseline range start:	3
Baseline range end:	7
Channel	Cycle	Temp	A1	A2	A3	A4	A5	A6	A7	A8	A9	A10	A11	A12	A13	A14	A15	A16	B1	B2	B3	B4	B5	B6	B7	B8
5	1	60	0	-2.93	-4.99	-5.22	-5.03	-4.65	-5.89	-3.98	-5.63	-4.07	-3.84	-5.27	-5.42	-4.29	-4.79	-0.91	-3.81	-3.01	-3.01	-4.5	-2.93	-2.51	-3.38	-4.43
5	2	60	3.3	0.27	-0.47	-0.97	0.01	0.33	-0.71	-0.43	-0.35	-0.54	0.15	-0.47	-0.33	0.38	-0.19	1.54	1.33	-0.34	-0.41	0.54	-0.36	-0.72	0.01	-0.74
5	3	60	5.48	1.85	2.2	1.72	2.8	3.01	2.41	1.62	2.47	1.65	2.31	2.5	2.54	2.8	2.18	2.63	3.46	1.2	1.21	3.16	1.4	0.66	1.94	1.81
5	4	60	5.61	1.31	2.11	2.44	2.24	3.31	3.1	1.87	1.88	2	2.4	3.31	2.83	1.96	2.02	2.39	1.36	1.53	1.7	3.11	2.26	1.91	1.83	3.67
5	5	60	6.94	1.56	2.38	2.73	2.02	1.59	1.95	0.71	1.09	1.56	0.99	2.95	1.76	1.14	1.97	0.8	0.07	1.64	1.2	1.9	2.03	1.35	2.47	2.42
5	6	60	8.84	1.65	2.35	3.17	2.47	1.69	2.5	2.19	2.48	2.23	0.63	1.61	1.64	1.36	1.86	1.35	2	1.55	2.39	1.75	1.02	1.17	2.45	1.32
5	7	60	7.18	0.19	-0.08	0.2	-0.13	-0.01	0.32	0.66	0.78	-0.14	-1.15	-1.5	0.41	-0.16	-0.11	-0.1	1.31	0.18	0.3	-1.44	-1.71	-1.14	-0.91	-1.35
5	8	60	6.2	-2.43	-1.58	-1.96	-2.09	-1.75	-1.7	-0.91	-0.38	-1.44	-1.03	-3.05	-1.15	-1.71	-2.04	-1.17	-0.63	-2.03	-1.07	-3.79	-2.26	-1.21	-3.31	-2.36
5	9	60	7.39	-2.07	-1.41	-1.24	-1.94	-2.81	-1.94	-1.97	-0.9	-1.17	-0.26	-1.57	-1.82	-2.48	-0.27	-1.05	-1.61	-1.3	-1.49	-2.51	-1.27	-0.12	-2.5	-1.4
5	10	60	10.11	-0.44	-0.04	1.26	-0.73	-1.63	0.3	0.66	-0.05	0.22	-0.36	0.23	-0.66	-1.07	0.47	-1.05	0.08	0.36	-1.32	0.28	0.66	1.27	0.23	0.32
5	11	60	13.14	0.72	0.59	0.79	1.17	-0.18	2.12	2.35	1.1	1.19	-0.12	2.43	0.84	1.13	-0.09	-1.43	1.33	1.71	-0.12	0.64	1.95	1.44	1.23	1.67
5	12	60	13.52	0.33	0.33	-0.87	0.49	0.42	0.36	0.25	0.19	0.63	0.53	1.55	0.85	1.54	-0.16	-3.75	1.21	-0.54	0.56	-0.33	0.88	0.13	0.28	0.79
5	13	60	13.52	-0.96	0.09	-1.49	0.03	-0.24	-0.48	-1.52	-0.25	-0.24	1.09	-0.59	0.73	1.16	0.79	-4.24	-0.66	-0.47	0.06	-0.01	-0.47	-0.42	-1.16	0.14
5	14	60	12.45	-1.47	-1.62	-1.86	-3.34	-2.39	-2.33	-2.93	-2.42	-2.56	-1.33	-2.14	-2.23	-1.78	-1.64	-6.4	-2.52	-0.48	-0.59	-0.7	-1.21	-1.81	-2.15	-1.87
5	15	60	15.73	2.41	0.15	1.31	-0.23	0.14	1.45	1.43	2.52	0.67	2.72	4.06	2.31	2.46	3.04	-1.96	0	4.17	3.18	1.9	3.12	1.57	2.97	3.07
5	16	60	17.33	5.33	3.57	4.61	2.26	3.16	4.16	4.1	5.89	4.82	7.43	10.44	8.32	6.06	7.74	1.13	1.06	7.33	6.7	5.22	6.87	5.61	6.84	6.89
5	17	60	18.13	6.5	8.41	7.35	5.45	5.84	7.88	7.64	9.36	8.29	13.89	16.62	15.59	10.63	12.74	4.93	0.44	13.63	8.77	9.93	10.48	11.04	11.02	12.99
5	18	60	14.84	7.98	10.88	9.14	5.32	5.93	7.51	9.24	9.91	9.56	19.96	25.15	22.25	14.6	17.27	7.29	-2.16	21.33	11.91	14.36	17.8	17.65	15.78	19.18
5	19	60	14.56	16.16	20.93	18.33	12.42	11.71	12.57	16.21	17.55	16.08	36.8	50.15	42.02	30.6	35.43	19.22	-2.44	36.73	22.82	27.3	35.35	33.71	32.01	38.98
5	20	60	15.58	34.38	42.78	38.1	27.25	24.89	22.21	31.07	33.64	31.39	68.66	96.02	79.02	59.7	68.89	41.67	-2.77	66.26	44.7	54.35	67.79	65.23	61.39	73.03
5	21	60	16.41	66.65	83.86	74.98	57.25	51.68	43.3	62.18	64.67	61.41	131.7	180.6	144.3	114.95	128.39	83.26	-1.51	126.39	85.7	107.25	126.69	126.64	118.34	136.56
5	22	60	14.3	125.48	152.62	140.6	109.38	96.68	77.39	116.39	119.11	113.12	224.89	308.32	246.85	201.55	225.85	156.12	-2.1	225.55	147.77	195.25	224.37	225.65	212.4	230.12
5	23	60	14.52	218.9	260.6	249.29	192.93	170.74	134.24	206.47	212.16	198.53	344.63	470.56	379.17	325.12	363.64	265.48	-3.46	361.6	232.83	326.93	360.96	369.26	354.33	349.12
5	24	60	15.27	343.03	404.56	395.94	307.89	271.44	213.07	335.14	340.82	321.75	458.81	628.41	511.2	458.13	519.08	391.77	-4.18	514.06	325.49	489.25	508.56	530.88	525.09	467.5
5	25	60	16.49	468.46	555.72	559.57	437.66	383.73	302	481	486.68	467.43	549.3	749.34	616	574.86	653.91	509.65	-3.52	651.41	410.32	646.63	634.97	677.55	689.37	562.65
5	26	60	16.52	569.57	679.56	699.24	551.05	478.22	376.22	604.67	614.32	599.62	604.13	822.45	681.67	652.29	744.68	591.05	-2.09	744.18	466.2	763.22	716.65	778.83	808.91	621.38
5	27	60	19.05	636.98	758.99	795.52	630.89	543.59	427	690.86	705.56	697.98	635.38	865.56	717.98	699.48	799.24	643.43	-0.68	796.84	502.16	835.5	766.49	840.36	880.64	656.61
5	28	60	20.71	673.27	802.41	845.8	672.96	581.37	455.24	740.01	756.47	756.72	651.59	886.62	735.48	721.7	830.37	669.73	0.1	823.93	520.09	874.84	791.94	870.07	917.29	676.57
5	29	60	22.21	685.84	819.78	870.25	689.22	597.07	467.4	762.31	779.02	782.24	656.4	893.74	740.55	728.53	839.73	681.29	-0.81	833.76	529.19	888.91	801.58	879.77	930.02	684.29
5	30	60	17.57	685.27	818.58	873.22	688.03	596.45	466.89	761.43	780.75	783.21	653.33	884.41	734.96	722.74	831.49	675.46	-3.61	829.46	522.93	886.59	795.45	874.78	928.71	679.35
5	31	60	14.44	680.35	810.44	865.82	681.83	587.18	460.29	753.41	774.24	778.28	643.1	872.73	724.27	712.39	818.69	665.91	-6.67	818.16	515.44	878.01	784.77	863.77	919.88	672.87
5	32	60	11.2	670.01	800.68	849.9	671.96	580.32	451.71	742.61	766.44	770.94	633.92	858.24	716.9	703.77	806.7	655.38	-11.51	808.52	505.97	866.77	772.53	852.21	908.75	664.06
5	33	60	11.15	659.81	794.41	839.04	664.48	573.66	444.69	736.45	761.07	764.11	626.65	852.78	707.84	698.25	799.2	647.32	-14.69	799.98	501.73	857.16	763.25	843.99	894.59	657.96
5	34	60	10.77	660.29	795.98	840.97	665.36	576.03	445.43	737.67	764.6	765.85	629.63	853.53	709.32	700.66	801.37	649.95	-13.24	803.31	503.54	859.98	766.61	845.78	894.75	660.12
5	35	60	13.86	669.41	804.88	852.38	672.2	579.77	450.31	745.71	772.81	774.81	638.32	862.11	714.81	709.58	810.19	656.67	-10.28	809.5	510.31	870.26	776.23	855.17	906.39	670.15
5	36	60	15.21	676.54	813.93	858.48	676.91	584.86	453.34	751.62	779.74	782.07	645.12	868.55	722.86	715.13	817.81	658.76	-9.35	819.21	517	880.43	783.81	863.51	919.9	677.18
5	37	60	14.56	672.9	811.15	852.52	672.64	578.35	449.26	748.1	773.72	779.05	640.07	866.1	716.71	709.61	814.54	653.12	-12.29	814.54	515.16	876.36	778.79	859.51	915.64	672.59
5	38	60	12.63	667.23	805.28	846.06	665.54	572.91	444.39	743.47	770.06	774.05	632.42	858.79	711.71	703.7	809.08	645.72	-14.03	809.08	509.62	867.86	772.97	849.39	905.42	670.05
5	39	60	11.8	663.19	799.76	837.85	659.79	567.66	440.16	737.2	766.13	769.98	627.86	854.23	706.09	700.63	801.52	639.9	-15.65	804.14	504.66	862.05	768.39	842.21	899.55	667.27
5	40	60	11.63	659.92	793.56	828.25	654.49	562.43	436.18	729.72	762.43	765.99	624.95	850.64	700.15	700	792.04	634.84	-17.04	798.99	498.96	856.76	764.24	835.7	895.17	665

## Sheet: Cq Results
Data step:	4			Show channel:	Thresholds:
Sample Group:	Default		Ch 1	No
Method:	Threshold		Ch 2	No
Smoothing:	ON		Ch 3	No
Smoothing window:	5		Ch 4	No
Baseline:	Trend		Ch 5	Yes	110.22
Baseline range start:	3
Baseline range end:	7
Well	Replicate	Fluorophore	Sample Type	Sample Name	Target	Cq	Quantity	Omitted	Description
A01-Ch5		SYBR	NTC		CONTROL	NeuN	0
A02-Ch5		SYBR	Unknown		T243	21.74	NeuN
A03-Ch5		SYBR	Unknown		T243	21.38	NeuN
A04-Ch5		SYBR	Unknown		T243	21.54	NeuN
A05-Ch5		SYBR	Unknown		T242	22.01	NeuN
A06-Ch5		SYBR	Unknown		T242	22.18	NeuN
A07-Ch5		SYBR	Unknown		T242	22.58	NeuN
A08-Ch5		SYBR	Unknown		T241	21.89	NeuN
A09-Ch5		SYBR	Unknown		T241	21.84	NeuN
A10-Ch5		SYBR	Unknown		T241	21.94	NeuN
A11-Ch5		SYBR	Unknown		T63	20.66	NeuN
A12-Ch5		SYBR	Unknown		T63	20.17	NeuN
A13-Ch5		SYBR	Unknown		T63	20.48	NeuN
A14-Ch5		SYBR	Unknown		T62	20.91	NeuN
A15-Ch5		SYBR	Unknown		T62	20.69	NeuN
A16-Ch5		SYBR	Unknown		T62	21.37	NeuN
B01-Ch5		SYBR	NTC		CONTROL	NeuN	0
B02-Ch5		SYBR	Unknown		T61	20.73	NeuN
B03-Ch5		SYBR	Unknown		T61	21.4	NeuN
B04-Ch5		SYBR	Unknown		T61	21.03	NeuN
B05-Ch5		SYBR	Unknown		T33	20.72	NeuN
B06-Ch5		SYBR	Unknown		T33	20.73	NeuN
B07-Ch5		SYBR	Unknown		T33	20.86	NeuN
B08-Ch5		SYBR	Unknown		T32	20.59	NeuN
B09-Ch5		SYBR	Unknown		T32	20.43	NeuN
B10-Ch5		SYBR	Unknown		T32	20.98	NeuN

## Sheet: Melt Curve Data
Sample Group:	Default		Show channel:
Smoothing:	ON		Ch 1	No
Smoothing window:	9		Ch 2	No
Low limit	63.5		Ch 3	No
High limit	91.5		Ch 4	No
Max # of peaks:	1		Ch 5	Yes
Peak threshold:	10
Slope Correction:	Yes
Derivative:	Negative
Temp	Channel	A1	A2	A3	A4	A5	A6	A7	A8	A9	A10	A11	A12	A13	A14	A15	A16	B1	B2	B3	B4	B5	B6	B7	B8	B9
60	5	67.5	770.35	915.5	964.11	796.38	695.89	537.38	849.62	869.86	862.53	723.14	970.28	803.33	796.51	900.33	758.99	66.29	912.8	598.06	974.94	876.63	953.5	1012.67	759.26	976.58
60.2	5	66.56	771.38	916.6	964.81	798.49	696.38	539.84	851.51	872.62	864.86	724.02	971.29	804.5	797.51	904.46	759.75	67.06	913.97	600.23	978.42	880.15	957.03	1015.39	761.49	977.84
60.4	5	65.45	770.84	915.74	963.65	798.61	695.42	540.47	851.38	872.96	865.06	723.21	970.19	803.95	796.84	905.95	758.84	67.2	913.28	600.71	979.32	881.34	958.15	1015.76	761.75	976.84
60.6	5	64.18	768.73	912.92	960.62	796.74	693.01	539.25	849.23	870.87	863.14	720.71	967	801.69	794.49	904.82	756.27	66.7	910.73	599.49	977.65	880.19	956.87	1013.78	760.06	973.58
60.8	5	62.75	765.06	908.14	955.73	792.89	689.14	536.19	845.06	866.36	859.1	716.52	961.71	797.72	790.46	901.06	752.03	65.57	906.31	596.57	973.4	876.72	953.19	1009.45	756.41	968.05
61	5	61.39	759.38	901.5	949.68	787.13	684.31	530.68	838.91	859.98	852.97	710.84	955.47	793.37	784.77	895.21	746.93	63.94	901.12	592.26	966.87	871.42	948.46	1003.44	751.68	960.01
61.2	5	59.99	753.28	893.3	941.99	779.81	678.44	524.49	830.64	851.37	845.03	703.78	945.26	786.11	778.16	885.64	738.71	61.55	892.58	586.45	957.86	863.42	940.08	994.65	744.14	950.63
61.4	5	57.59	745.25	882.24	930.12	769.26	669.01	517.29	821.16	838.9	835.1	693.78	933.86	775.53	769.37	874.03	729.85	58.72	882.31	577.83	945.82	852.45	929.19	983.48	734.89	938.92
61.6	5	54.7	734.74	868.64	914.99	756.78	657.14	508.38	810	825.55	821.9	682.39	919.17	763.44	757.65	861.1	718.44	55.06	868.48	567.34	930.85	839.53	915.29	968.79	722.57	925.2
61.8	5	51.09	723.04	855.19	900.83	745.77	645.79	500.03	798.83	811.17	809.98	671	905.25	749.96	745.26	848.03	707.11	52.42	854.27	557.99	916.6	826.95	901.96	954.58	711.24	912.1
62	5	48.48	713.09	842.47	889.86	736.3	636.96	493.48	790.05	800.58	800.6	660.96	891.97	740.18	735.48	839.13	698.03	49.79	843.44	551.16	905.36	817.21	892.8	943.05	702.72	902.36
62.2	5	47.6	707.95	834.98	882.77	731.04	632.21	489.62	786.02	794.69	794.91	656.69	884.66	735.08	730.18	834.28	693.93	48.89	837.26	547.65	898.25	812.21	888.25	935.95	698.08	896.95
62.4	5	46.25	703.96	829.36	877.57	726.75	628.87	487.04	781.73	790.06	789.83	652.66	878.88	730.75	726.11	830.35	689.93	48.4	832.02	544.94	893.55	809.38	885.65	930.15	694.68	893.73
62.6	5	45.49	700.75	823.29	871.53	722.7	624.84	483.36	777.51	785	784.6	648.95	873.54	727.31	721.68	825.59	685.15	46.94	827.89	541.59	887.16	805.19	880.25	923.79	690.26	888.74
62.8	5	45.16	701.63	822.27	870.55	722.26	625.28	483.51	776.45	784.88	783.64	648.82	872.88	727.09	723.53	826.22	683.91	47	827.74	542.3	886.07	805.87	881.72	923.93	690.67	889.15
63	5	44.8	702.71	821.7	868.57	721.3	624.59	483.53	776.4	784.37	781.99	646.94	872.09	725.72	724.06	826.78	683.66	47.05	827	541.77	883.31	804.93	881.72	922.74	691.3	888.34
63.2	5	43.6	699.02	817.31	862.28	717.7	620.92	481.41	772.27	781	776.65	643.56	868.14	720.89	720.85	822.93	680.76	45.88	821.93	538.46	877.63	800.64	877.34	917.29	688	883.07
63.4	5	42.52	694.36	810.49	856.09	713.81	615.6	477.05	766.1	774.85	771.87	638.36	860.15	713.25	715.22	817.5	674.57	45.37	815.47	534.01	869.95	793.98	871.83	912.14	684.14	876.13
63.6	5	41.62	689.93	804.12	851.24	709.04	611.71	474.22	761.3	769.7	767.64	634.82	854.33	708.36	711.48	814.31	669.56	44.49	810.08	530.26	864.17	788.76	867.84	907.8	680.59	871.09
63.8	5	41.52	685.26	797.8	844.58	705.07	607.24	470.62	756.9	763.97	762.46	631.24	847.23	703.29	707.21	809.71	665.25	43.57	803.78	526.44	857.25	783.71	863.09	900.95	674.71	865
64	5	39.91	678.53	789.73	835.45	698.19	601.67	465.88	748.79	755.05	755	625.07	838.03	695.81	700.73	801.29	657.4	42.32	795.19	520.68	848.79	775.88	854.68	890.89	667.41	857.33
64.2	5	39.75	674.63	783.49	829.14	693.62	597.62	462.93	744.11	749.54	750.31	621.77	834.19	692.05	695.41	795.76	651.08	41.24	790.64	517	843.11	770.25	848.26	884.8	663.17	852.3
64.4	5	41.01	677.39	786.59	832.34	696.32	601.24	465.67	746.8	752.49	753.18	624.55	838.35	695.48	699.32	798.93	654.29	42.69	792.79	519.84	846.75	773.88	852.64	887.89	666.87	855.68
64.6	5	43.11	681.54	791.88	836.99	701.5	606.53	468.56	751.73	757.96	757.76	627.99	844.38	701.14	704.03	803.57	659.89	44.51	797.2	523.86	852.27	777.89	856.76	892.04	672.95	861.4
64.8	5	44.26	684.09	795.57	840.66	706.16	610.95	471.64	755.6	761.87	761.03	631.83	848.81	704.34	707.94	806.54	663.32	45.92	800.83	526.83	855.77	780	860.55	895.34	676.92	866.02
65	5	44.76	684.19	795.15	842.62	706.67	611.04	471.85	754.91	761.88	761.6	632.72	848.32	704.18	708.13	807.23	663.02	46.59	801.84	527.11	855.09	779.59	859.87	896.31	677.32	866.08
65.2	5	44.09	681.09	791.17	839.13	703.77	608.73	469.92	752.06	758.42	758.91	631.33	845.05	701.34	706.09	804.41	660.6	46.31	798.05	524.38	850.26	776.37	855.73	892.81	673.19	862.75
65.4	5	42.52	673.3	781.98	828.29	695.23	601.4	464.07	744.3	748.9	750.11	624.41	832.99	691.89	697.97	795.55	652.68	44.17	788.38	516.97	839.4	767.98	845.18	882.41	663.84	852.03
65.6	5	39.73	661.96	767.75	813.74	682.31	590.8	455.82	731.27	734.65	736.57	613.32	816.68	679.21	685.59	782.2	639.38	41.05	774.06	506.1	824.06	754.1	830.13	866.91	651.77	836.61
65.8	5	37.69	653.34	755.36	800.54	671.24	580.61	448.69	720.45	722.48	724.72	603.24	804.41	667.18	675.55	770.38	629.23	38.21	762.07	496.91	811.33	742.52	818.17	854.04	641.95	823.99
66	5	36.83	647.07	746.17	790.18	663.67	573.82	444.22	712.64	714.75	716.01	596.01	795.1	659.44	668.97	761.76	623.34	36.57	752.1	490.34	802.49	735.25	810.36	844.56	635.17	814.56
66.2	5	36.09	641.84	739.16	782.47	658.16	569.73	440.5	706.51	708.38	709.8	589.87	788.11	653.05	664.25	755.11	618.57	35.46	745.44	485.79	795.82	728.53	804.39	836.55	630.65	809
66.4	5	34.33	636.89	731.92	774.96	650.89	565.49	436.49	700.6	701.66	703.32	583.59	779.94	646.61	658.34	747.49	611.75	34.79	739.88	482.12	787.99	721.02	797.83	828.39	624.14	802.07
66.6	5	32.96	631.42	726	770.48	646.55	561.47	433.17	695.22	697.49	699.55	580.13	774.55	643.09	653.34	742.15	606.87	34.14	735.25	478.88	782.7	716.69	792.79	823.42	619.79	795.92
66.8	5	31.96	626.18	720.62	766.12	642.06	558.53	429.51	692.34	693.83	695.85	576.65	768.98	639.6	649.67	737.12	602.77	33.92	730.4	476.42	777.74	712.74	788.27	818.77	614.86	791.06
67	5	30.76	619.48	714.83	759.25	635.67	553.57	425.13	687.48	688.67	690.36	572.46	761.94	634.49	644.12	731.47	596.94	32.73	723.57	472.66	771.24	707.94	781.94	812.58	609.52	783.43
67.2	5	30.66	616.32	711.78	756.41	632.89	551.65	423.14	685.54	687.06	686.99	569.87	757.76	632.03	641.77	727.96	593.48	31.86	719.44	470.67	767.51	704.01	778.15	809.59	607.22	779.72
67.4	5	31.75	616.76	712.22	756.13	633.81	551.11	422.6	686.58	687.4	686.73	569.25	759.18	631.67	642.29	727.43	593.32	32.42	719.01	470.34	767.01	703.51	778.06	809.21	608.16	779.92
67.6	5	32.91	618.93	713.81	755.61	635.5	551.75	424.15	688.84	688.81	687.3	569.68	762.13	632.74	643.29	728.93	593.4	33.55	718.9	471.08	767.52	703.61	778.22	809.81	609.72	780.77
67.8	5	33.77	620.32	714.53	755.01	636.65	552.37	425.53	688.91	686.86	687.25	569.46	763.18	632.75	644.1	729.01	593.78	34.75	717.49	470.95	766.45	702.65	777.77	807.36	610.21	781.45
68	5	34.48	621.12	713.04	754.09	635.05	552.13	425.8	688.54	686.14	686.28	569.18	760.68	631.71	642.19	727.33	592.75	36.35	716.71	471.46	765.62	700.68	776.82	805.78	609.1	780.26
68.2	5	35.51	621.82	711.83	754.89	636.75	552.16	426.41	689.11	686.84	687.17	569.36	759.85	631.71	641.52	726.8	592.53	37.71	716.79	471.31	765.19	700.86	776.27	806.42	609.7	781
68.4	5	35.04	617.37	706.16	750.08	631.05	548.41	422.4	685.17	681.68	682.43	565.66	753.31	626.87	637.44	721.63	589.33	37.57	711.68	468.53	760.19	696.84	770.91	801.28	604.68	775.1
68.6	5	33.67	611.31	697.95	742.79	624.64	542.59	417.61	677.62	675.72	676.18	560.14	745.31	620.38	631.65	715.8	583.74	36.87	704.96	464.41	752.26	690.82	763.26	793.74	597.93	766.96

## Sheet: Melting curve Results
Sample Group:	Default		Show channel:
Smoothing:	ON		Ch 1	No
Smoothing window:	9		Ch 2	No
Low limit	63.5		Ch 3	No
High limit	91.5		Ch 4	No
Max # of peaks:	1		Ch 5	Yes
Peak threshold:	10
Slope Correction:	Yes
Derivative:	Negative
Well	Replicate	Fluorophore	Sample Type	Sample Name	Target	Melt Temp 1	Peak Height 1	FW/HM Peak 1	Area Peak 1	Melt Temp 2	Peak Height 2	FW/HM Peak 2	Area Peak 2	Melt Temp 3	Peak Height 3	FW/HM Peak 3	Area Peak 3	Melt Temp 4	Peak Height 4	FW/HM Peak 4	Area Peak 4	Description
A01-Ch5		SYBR	NTC		CONTROL	90.11	49.4156006245653	0.271567832422256	14.2453363913142	0	0	0	0	0	0	0	0	0	0	0	0
A02-Ch5		SYBR	Unknown		T243	79.05	398.020548608931	1.68983707998802	715.895038021608	0	0	0	0	0	0	0	0	0	0	0	0
A03-Ch5		SYBR	Unknown		T243	79	491.733306108992	1.6394067882013	858.055494582293	0	0	0	0	0	0	0	0	0	0	0	0
A04-Ch5		SYBR	Unknown		T243	78.93	518.080836716416	1.61593495597844	891.087654709769	0	0	0	0	0	0	0	0	0	0	0	0
A05-Ch5		SYBR	Unknown		T242	79.05	399.377584393234	1.74836009724231	743.213508337357	0	0	0	0	0	0	0	0	0	0	0	0
A06-Ch5		SYBR	Unknown		T242	79.01	350.972634422946	1.7060927541693	637.345489682794	0	0	0	0	0	0	0	0	0	0	0	0
A07-Ch5		SYBR	Unknown		T242	78.86	309.111805585303	1.51503249747748	498.467173545774	0	0	0	0	0	0	0	0	0	0	0	0
A08-Ch5		SYBR	Unknown		T241	79.01	434.219434538104	1.71578140363551	792.994612179451	0	0	0	0	0	0	0	0	0	0	0	0
A09-Ch5		SYBR	Unknown		T241	79	466.88541324526	1.65105866665752	820.487244036067	0	0	0	0	0	0	0	0	0	0	0	0
A10-Ch5		SYBR	Unknown		T241	78.98	472.567886727277	1.60540175685729	807.508239710144	0	0	0	0	0	0	0	0	0	0	0	0
A11-Ch5		SYBR	Unknown		T63	78.98	395.81635861989	1.57995302513544	665.63620611954	0	0	0	0	0	0	0	0	0	0	0	0
A12-Ch5		SYBR	Unknown		T63	79.15	497.101361677418	1.70509984351688	902.181235670882	0	0	0	0	0	0	0	0	0	0	0	0
A13-Ch5		SYBR	Unknown		T63	79.04	456.138091178193	1.54903695322112	752.068054805496	0	0	0	0	0	0	0	0	0	0	0	0
A14-Ch5		SYBR	Unknown		T62	79.1700000000001	400.575776230658	1.75514901590317	748.33783050911	0	0	0	0	0	0	0	0	0	0	0	0
A15-Ch5		SYBR	Unknown		T62	79.2400000000001	451.340845516795	1.79232229562898	861.032943567441	0	0	0	0	0	0	0	0	0	0	0	0
A16-Ch5		SYBR	Unknown		T62	79.2000000000001	395.238684505658	1.68518119242874	708.932801898722	0	0	0	0	0	0	0	0	0	0	0	0
B01-Ch5		SYBR	NTC		CONTROL	88.59	59.8310151853895	0.20323001203537	13.5663754898017	0	0	0	0	0	0	0	0	0	0	0	0
B02-Ch5		SYBR	Unknown		T61	79.02	477.165321774205	1.68230606853955	854.422955408272	0	0	0	0	0	0	0	0	0	0	0	0
B03-Ch5		SYBR	Unknown		T61	78.81	354.471711704914	1.47256873077541	555.592250332616	0	0	0	0	0	0	0	0	0	0	0	0
B04-Ch5		SYBR	Unknown		T61	78.96	519.119620635733	1.65639505776395	915.23030607169	0	0	0	0	0	0	0	0	0	0	0	0
B05-Ch5		SYBR	Unknown		T33	78.96	462.505772694399	1.66467370215368	819.493096129026	0	0	0	0	0	0	0	0	0	0	0	0
B06-Ch5		SYBR	Unknown		T33	78.96	496.637543697556	1.68605495380287	891.272066684709	0	0	0	0	0	0	0	0	0	0	0	0
B07-Ch5		SYBR	Unknown		T33	78.9400000000001	533.176137131741	1.7183711736372	975.184310015884	0	0	0	0	0	0	0	0	0	0	0	0
B08-Ch5		SYBR	Unknown		T32	78.82	443.936779637197	1.5116525720566	714.28599888067	0	0	0	0	0	0	0	0	0	0	0	0
B09-Ch5		SYBR	Unknown		T32	78.96	507.240114452957	1.68607567541648	910.310762896846	0	0	0	0	0	0	0	0	0	0	0	0
