# Supplementary material for: Genome-wide identification of gene families related to miRNA biogenesis in Mangifera indica L. and their possible role during heat stress
Source: PeerJ. 2024 Jul 17;12:e17737. doi: 10.7717/peerj.17737 (PMC11260077; doi:10.7717/peerj.17737)
Supplement: Supplemental Information 31 [file peerj-12-17737-s031.xls]

## Sheet: Sheet1
ITEM TO CHECK	IMPORTANCE	CHECKLIST
EXPERIMENTAL DESIGN
Definition of experimental and control groups	E	line 160-164
Number within each group	E	line 164-165
Assay carried out by core lab or investigator's lab?	D	line 179-190
Acknowledgement of authors' contributions	D	line 561-564
SAMPLE
Description	E	line 162-165
Volume/mass of sample processed	D	line 168
Microdissection or macrodissection	E	no apply
Processing procedure	E	line 162-164
If frozen - how and how quickly?	E	line 162-164
If fixed - with what, how quickly?	E	no apply
Sample storage conditions and duration (especially for FFPE samples)	E	six weeks at -80ºC
NUCLEIC ACID EXTRACTION
Procedure and/or instrumentation	E	line 167-168
Name of kit and details of any modifications	E	No kit was used
Source of additional reagents used	D	line 168-169
Details of DNase or RNAse treatment	E	line 169-170
Contamination assessment (DNA or RNA)	E	line 170-171
Nucleic acid quantification	E	line 171-173
Instrument and method	E	line 172-173
Purity (A260/A280)	D	line 172-173
Yield	D
RNA integrity method/instrument	E	line 173-175
RIN/RQI or Cq of 3' and 5' transcripts	E	primers are internal
Electrophoresis traces	D	line 173-174
Inhibition testing (Cq dilutions, spike or other)	E
REVERSE TRANSCRIPTION
Complete reaction conditions	E	line 175-178
Amount of RNA and reaction volume	E	line 176
Priming oligonucleotide (if using GSP) and concentration	E	no apply
Reverse transcriptase and concentration	E	line 175-177
Temperature and time	E	line 175-177
Manufacturer of reagents and catalogue numbers	D	line 177
Cqs with and without RT	D*	conventional PCR
Storage conditions of cDNA	D	line 178
qPCR TARGET INFORMATION
If multiplex, efficiency and LOD of each assay.	E	No apply
Sequence accession number	E	Table 1
Location of amplicon	D
Amplicon length	E	between 90 and 120 bp
In silico specificity screen (BLAST, etc)	E	blasted against all mango transcripts
Pseudogenes, retropseudogenes or other homologs?	D	no apply
Sequence alignment	D
Secondary structure analysis of amplicon	D
Location of each primer by exon or intron (if applicable)	E	No apply
What splice variants are targeted?	E	no apply
qPCR OLIGONUCLEOTIDES
Primer sequences	E	line 179-180
RTPrimerDB Identification Number	D
Probe sequences	D**	No apply
Location and identity of any modifications	E	No apply
Manufacturer of oligonucleotides	D	line 180-181
Purification method	D	desalting
qPCR PROTOCOL
Complete reaction conditions	E	line 183-190
Reaction volume and amount of cDNA/DNA	E	line 183-184
Primer, (probe), Mg++ and dNTP concentrations	E	line 183-185
Polymerase identity and concentration	E	line 185
Buffer/kit identity and manufacturer	E	line 185
Exact chemical constitution of the buffer	D
Additives (SYBR Green I, DMSO, etc.)	E	line 185
Manufacturer of plates/tubes and catalog number	D
Complete thermocycling parameters	E	line 188
Reaction setup (manual/robotic)	D
Manufacturer of qPCR instrument	E	line 187
qPCR VALIDATION
Evidence of optimisation (from gradients)	D
Specificity (gel, sequence, melt, or digest)	E	line 189-190
For SYBR Green I, Cq of the NTC	E	it was undetermined
Standard curves with slope and y-intercept	E	support files of data
PCR efficiency calculated from slope	E	between 90 and 98
Confidence interval for PCR efficiency or standard error	D
r2 of standard curve	E	0.93 to 0.99
Linear dynamic range	E	100 to 0.16 ng of DNA
Cq variation at lower limit	E
Confidence intervals throughout range	D
Evidence for limit of detection	E
If multiplex, efficiency and LOD of each assay.	E	No apply
DATA ANALYSIS
qPCR analysis program (source, version)	E	line 190-191
Cq method determination	E	line 190
Outlier identification and disposition	E
Results of NTCs	E	they were undetermined
Justification of number and choice of reference genes	E	line 181-182
Description of normalisation method	E	line 181-182
Number and concordance of biological replicates	D
Number and stage (RT or qPCR) of technical replicates	E	line 186
Repeatability (intra-assay variation)	E
Reproducibility (inter-assay variation, %CV)	D
Power analysis	D
Statistical methods for result significance	E	line 191-193
Software (source, version)	E	line 192
Cq or raw data submission using RDML	D
Table 1. MIQE checklist for authors, reviewers and editors. All essential information (E) must be submitted with the manuscript. Desirable
information (D) should be submitted if available. If using primers obtained from RTPrimerDB, information on qPCR target, oligonucleotides,
protocols and validation is available from that source.
*: Assessing the absence of DNA using a no RT assay is essential when first extracting RNA. Once the sample has been validated as
RDNA-free, inclusion of a no-RT control is desirable, but no longer essential.
**: Disclosure of the probe sequence is highly desirable and strongly encouraged. However, since not all commercial pre-designed assay
vendors provide this information, it cannot be an essential requirement. Use of such assays is advised against.
