# Supplementary material for: Genome-wide identification of gene families related to miRNA biogenesis in Mangifera indica L. and their possible role during heat stress
Source: PeerJ. 2024 Jul 17;12:e17737. doi: 10.7717/peerj.17737 (PMC11260077; doi:10.7717/peerj.17737)
Supplement: Supplemental Information 32 [file peerj-12-17737-s032.xlsx]

## Sheet: HSP90 Control
Gene					Housekeeping gene
HSP90					GAPDH
Sample number	Day/replicate	Ct	AVERAGE Ct	AVERAGE Ct at C0	Sample number	Day/Replicate	Ct	AVERAGE Ct	AVERAGE Ct at C0	ΔΔCT	2^(-ΔΔCT)	Fold Change	Standard Deviation 2^(-ΔΔCT)	Standard Error 2^(-ΔΔCT)
1	Control 0 h/Biological sample 1/Replicate 1	21.5	21.18	21.18	1	Control 0 h/Biological sample 1/Replicate 1	20.14	20.175	20.175	0	1	1	0	0
2	Control 0 h/Biological sample 1/Replicate 2	21.28			2	Control 0 h/Biological sample 1/Replicate 2	20.21
3	Control 0 h/Biological sample 1/Replicate 3	20.77			3	Control 0 h/Biological sample 1/Replicate 3	21.08
4	Control 0 h/Biological sample 2/Replicate 1	21.55	21.78	21.78	4	Control 0 h/Biological sample 2/Replicate 1	20.1	20.0833	20.0833	0	1
5	Control 0 h/Biological sample 2/Replicate 2	21.66			5	Control 0 h/Biological sample 2/Replicate 2	20.03
6	Control 0 h/Biological sample 2/Replicate 3	22.15			6	Control 0 h/Biological sample 2/Replicate 3	20.12
7	Control 0 h/Biological sample 3/Replicate 1	20.97	21.34	21.34	7	Control 0 h/Biological sample 3/Replicate 1	20.34	20.32	20.32	0	1
8	Control 0 h/Biological sample 3/Replicate 2	21.13			8	Control 0 h/Biological sample 3/Replicate 2	20.3
9	Control 0 h/Biological sample 3/Replicate 3	21.93			9	Control 0 h/Biological sample 3/Replicate 3	20.87
10	Control 1 h/Biological sample 1/Replicate 1	21.08	21.6	21.18	10	Control 1 h/Biological sample 1/Replicate 1	20.74	20.75	20.175	-0.155	1.11342	1.26432	0.579426	1.5827
11	Control 1 h/Biological sample 1/Replicate 2	21.32			11	Control 1 h/Biological sample 1/Replicate 2	20.76
12	Control 1 h/Biological sample 1/Replicate 3	22.4			12	Control 1 h/Biological sample 1/Replicate 3	21.21
13	Control 1 h/Biological sample 2/Replicate 1	21.23	21.37	21.78	13	Control 1 h/Biological sample 2/Replicate 1	20.35	20.4167	20.0833	-0.743333	1.67404
14	Control 1 h/Biological sample 2/Replicate 2	21.37			14	Control 1 h/Biological sample 2/Replicate 2	20.44
15	Control 1 h/Biological sample 2/Replicate 3	21.51			15	Control 1 h/Biological sample 2/Replicate 3	20.46
16	Control 1 h/Biological sample 3/Replicate 1	21.36	21.59	21.34	16	Control 1 h/Biological sample 3/Replicate 1	20.3	20.3433	20.32	0.226667	0.854607
17	Control 1 h/Biological sample 3/Replicate 2	21.4			17	Control 1 h/Biological sample 3/Replicate 2	20.2
18	Control 1 h/Biological sample 3/Replicate 3	22.02			18	Control 1 h/Biological sample 3/Replicate 3	20.53
19	Control 3 h/Biological sample 1/Replicate 1	21.83	22.04	21.18	19	Control 3 h/Biological sample 1/Replicate 1	21.27	21.4033	20.175	-0.368333	1.29086	1.27838	0.35056	0.1933
20	Control 3 h/Biological sample 1/Replicate 2	21.86			20	Control 3 h/Biological sample 1/Replicate 2	21.58
21	Control 3 h/Biological sample 1/Replicate 3	22.44			21	Control 3 h/Biological sample 1/Replicate 3	21.36
22	Control 3 h/Biological sample 2/Replicate 1	20.82	20.89	21.78	22	Control 3 h/Biological sample 2/Replicate 1	19.94	19.8033	20.0833	-0.61	1.52626
23	Control 3 h/Biological sample 2/Replicate 2	20.9			23	Control 3 h/Biological sample 2/Replicate 2	19.65
24	Control 3 h/Biological sample 2/Replicate 3	20.97			24	Control 3 h/Biological sample 2/Replicate 3	19.82
25	Control 3 h/Biological sample 3/Replicate 1	NeuN	21.33	21.34	25	Control 3 h/Biological sample 3/Replicate 1	20.39	20.3533	20.32	-0.0433333	1.03049
26	Control 3 h/Biological sample 3/Replicate 2	21.16			26	Control 3 h/Biological sample 3/Replicate 2	20.29
27	Control 3 h/Biological sample 3/Replicate 3	21.5			27	Control 3 h/Biological sample 3/Replicate 3	20.38
28	Control 6 h/Biological sample 1/Replicate 1	21.28	21.5	21.18	28	Control 6 h/Biological sample 1/Replicate 1	22.05	22.13	20.175	-1.635	3.10588	0.757476	0.0129935	0.7011
29	Control 6 h/Biological sample 1/Replicate 2	21.42			29	Control 6 h/Biological sample 1/Replicate 2	22.06
30	Control 6 h/Biological sample 1/Replicate 3	21.82			30	Control 6 h/Biological sample 1/Replicate 3	22.28
31	Control 6 h/Biological sample 2/Replicate 1	24.12	24.55	21.78	31	Control 6 h/Biological sample 2/Replicate 1	22.47	22.435	20.0833	0.418333	0.748289
32	Control 6 h/Biological sample 2/Replicate 2	24.18			32	Control 6 h/Biological sample 2/Replicate 2	22.4
33	Control 6 h/Biological sample 2/Replicate 3	25.35			33	Control 6 h/Biological sample 2/Replicate 3	23.55
34	Control 6 h/Biological sample 3/Replicate 1	21.52	21.71	21.34	34	Control 6 h/Biological sample 3/Replicate 1	20.26	20.3067	20.32	0.383333	0.766664
35	Control 6 h/Biological sample 3/Replicate 2	21.63			35	Control 6 h/Biological sample 3/Replicate 2	20.3
36	Control 6 h/Biological sample 3/Replicate 3	22			36	Control 6 h/Biological sample 3/Replicate 3	20.36
37	Control 24 h/Biological sample 1/Replicate 1	21.55	21.52	21.18	37	Control 24 h/Biological sample 1/Replicate 1	20.5	20.3733	20.175	0.141667	0.906471	1.42253	0.729811	7.9454
38	Control 24 h/Biological sample 1/Replicate 2	21.37			38	Control 24 h/Biological sample 1/Replicate 2	20.27
39	Control 24 h/Biological sample 1/Replicate 3	21.66			39	Control 24 h/Biological sample 1/Replicate 3	20.35
40	Control 24 h/Biological sample 2/Replicate 1	22.78	23.06	21.78	40	Control 24 h/Biological sample 2/Replicate 1	21.13	21.13	20.0833	0.233333	0.850667
41	Control 24 h/Biological sample 2/Replicate 2	23.25			41	Control 24 h/Biological sample 2/Replicate 2	21.16
42	Control 24 h/Biological sample 2/Replicate 3	23.16			42	Control 24 h/Biological sample 2/Replicate 3	21.1
43	Control 24 h/Biological sample 3/Replicate 1	19.84	19.94	21.34	43	Control 24 h/Biological sample 3/Replicate 1	19.91	19.875	20.32	-0.955	1.93858
44	Control 24 h/Biological sample 3/Replicate 2	19.91			44	Control 24 h/Biological sample 3/Replicate 2	19.84
45	Control 24 h/Biological sample 3/Replicate 3	20.07			45	Control 24 h/Biological sample 3/Replicate 3	20.46
Time	RE	SD
C0	1	0
C1	1.85865	0.0288465
C3	2.21394	0.148189
C6	1.11214	0.00363394
C24	0.611412	0.197247

## Sheet: HSP90 QHWT
Gene					Housekeeping gene
HSP90					GAPDH
Sample number	Day/replicate	Ct	AVERAGE Ct	AVERAGE Ct at C0	Sample number	Day/Replicate	Ct	AVERAGE Ct	AVERAGE Ct at C0	ΔΔCT	2^(-ΔΔCT)	Fold Change	Standard Deviation 2^(-ΔΔCT)	Standard Error 2^(-ΔΔCT)
1	QHWT 0 h/Biological sample 1/Replicate 1	24.15	24.52	24.52	1	QHWT 0 h/Biological sample 1/Replicate 1	22.18	22.2767	22.2767	0	1	1	0
2	QHWT 0 h/Biological sample 1/Replicate 2	24.49			2	QHWT 0 h/Biological sample 1/Replicate 2	22.31
3	QHWT 0 h/Biological sample 1/Replicate 3	24.92			3	QHWT 0 h/Biological sample 1/Replicate 3	22.34
4	QHWT 0 h/Biological sample 2/Replicate 1	23.58	23.6	23.6	4	QHWT 0 h/Biological sample 2/Replicate 1	21.4	21.8167	21.8167	0	1
5	QHWT 0 h/Biological sample 2/Replicate 2	23.42			5	QHWT 0 h/Biological sample 2/Replicate 2	21.93
6	QHWT 0 h/Biological sample 2/Replicate 3	23.82			6	QHWT 0 h/Biological sample 2/Replicate 3	22.12
7	QHWT 0 h/Biological sample 3/Replicate 1	21.74	21.82	21.82	7	QHWT 0 h/Biological sample 3/Replicate 1	20.23	20.2933	20.2933	0	1
8	QHWT 0 h/Biological sample 3/Replicate 2	21.72			8	QHWT 0 h/Biological sample 3/Replicate 2	20.36
9	QHWT 0 h/Biological sample 3/Replicate 3	22.01			9	QHWT 0 h/Biological sample 3/Replicate 3	20.29
10	QHWT 1 h/Biological sample 1/Replicate 1	21.55	21.65	24.52	10	QHWT 1 h/Biological sample 1/Replicate 1	21.01	21.0067	22.2767	-1.6	3.03143	1.36387	1.12017
11	QHWT 1 h/Biological sample 1/Replicate 2	21.61			11	QHWT 1 h/Biological sample 1/Replicate 2	20.79
12	QHWT 1 h/Biological sample 1/Replicate 3	21.8			12	QHWT 1 h/Biological sample 1/Replicate 3	21.22
13	QHWT 1 h/Biological sample 2/Replicate 1	22.31	22.31	23.6	13	QHWT 1 h/Biological sample 2/Replicate 1	20.98	21.06	21.8167	-0.533333	1.44727
14	QHWT 1 h/Biological sample 2/Replicate 2	22.3			14	QHWT 1 h/Biological sample 2/Replicate 2	20.95
15	QHWT 1 h/Biological sample 2/Replicate 3	22.34			15	QHWT 1 h/Biological sample 2/Replicate 3	21.25
16	QHWT 1 h/Biological sample 3/Replicate 1	21.56	21.61	21.82	16	QHWT 1 h/Biological sample 3/Replicate 1	20.24	20.44	20.2933	-0.356667	1.28046
17	QHWT 1 h/Biological sample 3/Replicate 2	21.37			17	QHWT 1 h/Biological sample 3/Replicate 2	20.19
18	QHWT 1 h/Biological sample 3/Replicate 3	21.91			18	QHWT 1 h/Biological sample 3/Replicate 3	20.89
19	QHWT 3 h/Biological sample 1/Replicate 1	20.84	20.83	24.52	19	QHWT 3 h/Biological sample 1/Replicate 1	20.1	20.1433	22.2767	-1.55667	2.94173	2.51816	0.599022
20	QHWT 3 h/Biological sample 1/Replicate 2	20.7			20	QHWT 3 h/Biological sample 1/Replicate 2	20.11
21	QHWT 3 h/Biological sample 1/Replicate 3	21.11			21	QHWT 3 h/Biological sample 1/Replicate 3	20.22
22	QHWT 3 h/Biological sample 2/Replicate 1	20.59	20.66	23.6	22	QHWT 3 h/Biological sample 2/Replicate 1	20.04	19.9433	21.8167	-1.06667	2.09459
23	QHWT 3 h/Biological sample 2/Replicate 2	20.43			23	QHWT 3 h/Biological sample 2/Replicate 2	19.77
24	QHWT 3 h/Biological sample 2/Replicate 3	20.98			24	QHWT 3 h/Biological sample 2/Replicate 3	20.02
25	QHWT 3 h/Biological sample 3/Replicate 1	20.72	20.77	21.82	25	QHWT 3 h/Biological sample 3/Replicate 1	20.35	20.1833	20.2933	-0.94	1.91853
26	QHWT 3 h/Biological sample 3/Replicate 2	20.73			26	QHWT 3 h/Biological sample 3/Replicate 2	19.93
27	QHWT 3 h/Biological sample 3/Replicate 3	20.86			27	QHWT 3 h/Biological sample 3/Replicate 3	20.27
28	QHWT 6 h/Biological sample 1/Replicate 1	20.73	21.05	24.52	28	QHWT 6 h/Biological sample 1/Replicate 1	20.28	20.35	22.2767	-1.54333	2.91467	1.48503	0.971735
29	QHWT 6 h/Biological sample 1/Replicate 2	21.4			29	QHWT 6 h/Biological sample 1/Replicate 2	20.22
30	QHWT 6 h/Biological sample 1/Replicate 3	21.03			30	QHWT 6 h/Biological sample 1/Replicate 3	20.55
31	QHWT 6 h/Biological sample 2/Replicate 1	20.91	20.99	23.6	31	QHWT 6 h/Biological sample 2/Replicate 1	19.91	19.83	21.8167	-0.623333	1.54043
32	QHWT 6 h/Biological sample 2/Replicate 2	20.69			32	QHWT 6 h/Biological sample 2/Replicate 2	19.67
33	QHWT 6 h/Biological sample 2/Replicate 3	21.37			33	QHWT 6 h/Biological sample 2/Replicate 3	19.91
34	QHWT 6 h/Biological sample 3/Replicate 1	20.66	20.43	21.82	34	QHWT 6 h/Biological sample 3/Replicate 1	20.2	20.0033	20.2933	-1.1	2.14355
35	QHWT 6 h/Biological sample 3/Replicate 2	20.17			35	QHWT 6 h/Biological sample 3/Replicate 2	19.7
36	QHWT 6 h/Biological sample 3/Replicate 3	20.48			36	QHWT 6 h/Biological sample 3/Replicate 3	20.11
37	QHWT 24 h/Biological sample 1/Replicate 1	21.89	21.89	24.52	37	QHWT 24 h/Biological sample 1/Replicate 1	21.41	21.1833	22.2767	-1.53667	2.90123	1.69604	1.7044
38	QHWT 24 h/Biological sample 1/Replicate 2	21.84			38	QHWT 24 h/Biological sample 1/Replicate 2	21.03
39	QHWT 24 h/Biological sample 1/Replicate 3	21.94			39	QHWT 24 h/Biological sample 1/Replicate 3	21.11
40	QHWT 24 h/Biological sample 2/Replicate 1	22.01	22.25	23.6	40	QHWT 24 h/Biological sample 2/Replicate 1	19.16	19.44	21.8167	1.02667	0.490843
41	QHWT 24 h/Biological sample 2/Replicate 2	22.18			41	QHWT 24 h/Biological sample 2/Replicate 2	19.15
42	QHWT 24 h/Biological sample 2/Replicate 3	22.58			42	QHWT 24 h/Biological sample 2/Replicate 3	20.01
43	QHWT 24 h/Biological sample 3/Replicate 1	21.74	21.55	21.82	43	QHWT 24 h/Biological sample 3/Replicate 1	20.02	20.3433	20.2933	-0.32	1.24833
44	QHWT 24 h/Biological sample 3/Replicate 2	21.38			44	QHWT 24 h/Biological sample 3/Replicate 2	20.06
45	QHWT 24 h/Biological sample 3/Replicate 3	21.54			45	QHWT 24 h/Biological sample 3/Replicate 3	20.95

## Sheet: AGO1 Control
Gene					Housekeeping gene
ARGONAUTE 1					GAPDH
Sample number	Day/replicate	Ct	AVERAGE Ct	AVERAGE Ct at C0	Sample number	Day/Replicate	Ct	AVERAGE Ct	AVERAGE Ct at C0	ΔΔCT	2^(-ΔΔCT)	Fold Change	Standard Deviation 2^(-ΔΔCT)	Standard Error 2^(-ΔΔCT)
1	Control 0 h/Biological sample 1/Replicate 1	25.47	25.3167	25.3167	1	Control 0 h/Biological sample 1/Replicate 1	20.14	20.175	20.175	0	1	1	0	0
2	Control 0 h/Biological sample 1/Replicate 2	25.04			2	Control 0 h/Biological sample 1/Replicate 2	20.21
3	Control 0 h/Biological sample 1/Replicate 3	25.44			3	Control 0 h/Biological sample 1/Replicate 3	21.08
4	Control 0 h/Biological sample 2/Replicate 1	25.1	25.1767	25.1767	4	Control 0 h/Biological sample 2/Replicate 1	20.1	20.0833	20.0833	0	1
5	Control 0 h/Biological sample 2/Replicate 2	25.12			5	Control 0 h/Biological sample 2/Replicate 2	20.03
6	Control 0 h/Biological sample 2/Replicate 3	25.31			6	Control 0 h/Biological sample 2/Replicate 3	20.12
7	Control 0 h/Biological sample 3/Replicate 1	26.36	26.38	26.38	7	Control 0 h/Biological sample 3/Replicate 1	20.34	20.32	20.32	0	1
8	Control 0 h/Biological sample 3/Replicate 2	26.15			8	Control 0 h/Biological sample 3/Replicate 2	20.3
9	Control 0 h/Biological sample 3/Replicate 3	26.63			9	Control 0 h/Biological sample 3/Replicate 3	20.87
10	Control 1 h/Biological sample 1/Replicate 1	27.67	27.65	25.3167	10	Control 1 h/Biological sample 1/Replicate 1	20.74	20.9033	20.175	1.605	0.328736	2.03335	0.882505	1.5827
11	Control 1 h/Biological sample 1/Replicate 2	27.63			11	Control 1 h/Biological sample 1/Replicate 2	20.76
12	Control 1 h/Biological sample 1/Replicate 3	27.49			12	Control 1 h/Biological sample 1/Replicate 3	21.21
13	Control 1 h/Biological sample 2/Replicate 1	25	25.015	25.1767	13	Control 1 h/Biological sample 2/Replicate 1	20.35	20.4167	20.0833	-0.495	1.40932
14	Control 1 h/Biological sample 2/Replicate 2	25.03			14	Control 1 h/Biological sample 2/Replicate 2	20.44
15	Control 1 h/Biological sample 2/Replicate 3	25.17			15	Control 1 h/Biological sample 2/Replicate 3	20.46
16	Control 1 h/Biological sample 3/Replicate 1	25.01	24.9933	26.38	16	Control 1 h/Biological sample 3/Replicate 1	20.3	20.3433	20.32	-1.41	2.65737
17	Control 1 h/Biological sample 3/Replicate 2	24.89			17	Control 1 h/Biological sample 3/Replicate 2	20.2
18	Control 1 h/Biological sample 3/Replicate 3	25.08			18	Control 1 h/Biological sample 3/Replicate 3	20.53
19	Control 3 h/Biological sample 1/Replicate 1	27.23	27.3067	25.3167	19	Control 3 h/Biological sample 1/Replicate 1	21.27	21.4033	20.175	0.761667	0.589815	1.47806	0.394851	0.1933
20	Control 3 h/Biological sample 1/Replicate 2	27.29			20	Control 3 h/Biological sample 1/Replicate 2	21.58
21	Control 3 h/Biological sample 1/Replicate 3	27.4			21	Control 3 h/Biological sample 1/Replicate 3	21.36
22	Control 3 h/Biological sample 2/Replicate 1	24.66	24.635	25.1767	22	Control 3 h/Biological sample 2/Replicate 1	19.94	19.8033	20.0833	-0.261667	1.19886
23	Control 3 h/Biological sample 2/Replicate 2	24.42			23	Control 3 h/Biological sample 2/Replicate 2	19.65
24	Control 3 h/Biological sample 2/Replicate 3	24.61			24	Control 3 h/Biological sample 2/Replicate 3	19.82
25	Control 3 h/Biological sample 3/Replicate 1	25.63	25.6	26.38	25	Control 3 h/Biological sample 3/Replicate 1	20.39	20.3533	20.32	-0.813333	1.75727
26	Control 3 h/Biological sample 3/Replicate 2	25.57			26	Control 3 h/Biological sample 3/Replicate 2	20.29
27	Control 3 h/Biological sample 3/Replicate 3	25.8			27	Control 3 h/Biological sample 3/Replicate 3	20.38
28	Control 6 h/Biological sample 1/Replicate 1	27.58	27.55	25.3167	28	Control 6 h/Biological sample 1/Replicate 1	22.05	22.13	20.175	0.278333	0.824543	0.693211	0.185731	0.7011
29	Control 6 h/Biological sample 1/Replicate 2	27.27			29	Control 6 h/Biological sample 1/Replicate 2	22.06
30	Control 6 h/Biological sample 1/Replicate 3	27.52			30	Control 6 h/Biological sample 1/Replicate 3	22.28
31	Control 6 h/Biological sample 2/Replicate 1	28.34	28.36	25.1767	31	Control 6 h/Biological sample 2/Replicate 1	22.47	22.435	20.0833	0.831667	0.56188
32	Control 6 h/Biological sample 2/Replicate 2	28.38			32	Control 6 h/Biological sample 2/Replicate 2	22.4
33	Control 6 h/Biological sample 2/Replicate 3	28.06			33	Control 6 h/Biological sample 2/Replicate 3	23.55
34	Control 6 h/Biological sample 3/Replicate 1	26.09	25.89	26.38	34	Control 6 h/Biological sample 3/Replicate 1	20.26	20.3067	20.32	-0.476667	1.39152
35	Control 6 h/Biological sample 3/Replicate 2	25.88			35	Control 6 h/Biological sample 3/Replicate 2	20.3
36	Control 6 h/Biological sample 3/Replicate 3	25.9			36	Control 6 h/Biological sample 3/Replicate 3	20.36
37	Control 24 h/Biological sample 1/Replicate 1	25.56	25.145	25.3167	37	Control 24 h/Biological sample 1/Replicate 1	20.5	20.3733	20.175	-0.37	1.29235	1.29486	0.00851713	7.9454
38	Control 24 h/Biological sample 1/Replicate 2	25.24			38	Control 24 h/Biological sample 1/Replicate 2	20.27
39	Control 24 h/Biological sample 1/Replicate 3	25.05			39	Control 24 h/Biological sample 1/Replicate 3	20.35
40	Control 24 h/Biological sample 2/Replicate 1	26.07	25.84	25.1767	40	Control 24 h/Biological sample 2/Replicate 1	21.13	21.13	20.0833	-0.383333	1.30435
41	Control 24 h/Biological sample 2/Replicate 2	25.77			41	Control 24 h/Biological sample 2/Replicate 2	21.16
42	Control 24 h/Biological sample 2/Replicate 3	25.91			42	Control 24 h/Biological sample 2/Replicate 3	21.1
43	Control 24 h/Biological sample 3/Replicate 1	25.44	25.57	26.38	43	Control 24 h/Biological sample 3/Replicate 1	19.91	19.875	20.32	-0.365	1.28788
44	Control 24 h/Biological sample 3/Replicate 2	24.56			44	Control 24 h/Biological sample 3/Replicate 2	19.84
45	Control 24 h/Biological sample 3/Replicate 3	25.7			45	Control 24 h/Biological sample 3/Replicate 3	20.46
Tiempo	ER	DE
C0	1	0
C1	2.04236	0.869761
C3	1.48573	0.38401
C6	0.696804	0.18065
C24	1.30042	0.0179888
MANGOS TRATADOS																EFECTO DEL TH SOBRE EXPRESIÓN GÉNICA
Gen de interés					GAPDH
Argonauta 1					GAPDH															EFECTO DEL TRATAMIENTO HIDROTÉRMICO EN EXPRESIÓN
Formula= [Ct PG-CtGAPDH]dia X- [Ct PG-CtGAPDH]dia 4					Formula= [Ct PG-CtGAPDH]dia X- [Ct PG-CtGAPDH]dia 4
No. Muestra	Día/Réplica	Ct	AVERAGE Ct	AVE Ct et 1	No. Muestra	Día/Réplica	Ct	AVE Ct	AVE Ct MiPG1	ΔΔCT	2^(-ΔΔCT)	Fold Change	SD 2^(-ΔΔCT)	SE 2^(-ΔΔCT)		Cambio expresión		PROMEDIO	DE		HORA	FOLD CHANGE	DE
1	T0R1	31.53	28.3233	28.3233	1	T0R1	22.18	22.2767	22.2767	0	1	1	0	0		0.534033	-1.87254	-2.22819	0.401463		0	-2.22819	0.401463
2	T0R1	29.74			2	T0R1	22.31														1	-2.13956	0.625304
3	T0R1	29.98			3	T0R1	22.34														3	2.11016	0.739297
4	T0R2	28.14	28.3233	28.3233	4	T0R2	21.4	21.8167	21.8167	0	1					0.375443	-2.66352				6	1.6911	0.230162
5	T0R2	28.3			5	T0R2	21.93														24	-1.49875	0.0514105
6	T0R2	28.53			6	T0R2	22.12
7	TOR3	27.41	27.4567	27.4567	7	TOR3	20.23	20.2933	20.2933	0	1					0.46544	-2.14851
8	TOR3	27.39			8	TOR3	20.36
9	TOR3	27.57			9	TOR3	20.29
10	T1R1	26.97	26.7333	28.3233	10	T1R1	21.01	21.0067	22.2767	-0.32	1.24833	1.35115	0.145411	1.5827		2.02792		-2.13956	0.625304
11	T1R1	26.55			11	T1R1	20.79
12	T1R1	26.68			12	T1R1	21.22
13	T1R2	26.91	27.0267	28.3233	13	T1R2	20.98	21.06	21.8167	-0.54	1.45397					0.387338	-2.58172
14	T1R2	27.09			14	T1R2	20.95											-2.13956
15	T1R2	27.08			15	T1R2	21.25
16	T1R3	25.88	25.8533	27.4567	16	T1R3	20.24	20.44	20.2933	-1.75	3.36359					0.589134	-1.69741
17	T1R3	25.53			17	T1R3	20.19
18	T1R3	26.15			18	T1R3	20.89
19	T3R1	24.98	24.65	28.3233	19	T3R1	20.1	20.1433	22.2767	-1.54	2.90795	2.87146	0.0516013	0.1933		2.63293		2.11016	0.739297
20	T3R1	24.34			20	T3R1	20.11
21	T3R1	24.63			21	T3R1	20.22
22	T3R2	25.05	24.9467	28.3233	22	T3R2	20.04	19.9433	21.8167	-1.50333	2.83497					0.887816		2.11016
23	T3R2	24.76			23	T3R2	19.77
24	T3R2	25.03			24	T3R2	20.02
25	T3R3	24.7	24.7633	27.4567	25	T3R3	20.35	20.1833	20.2933	-2.58333	5.99323					1.5874
26	T3R3	24.52			26	T3R3	19.93
27	T3R3	25.07			27	T3R3	20.27
28	T6R1	25.1	25.14	28.3233	28	T6R1	20.28	20.35	22.2767	-1.25667	2.38943	2.6588	0.380947	0.7011		1.54756		1.6911	0.230162
29	T6R1	25.22			29	T6R1	20.22
30	T6R1	25.1			30	T6R1	20.55
31	T6R2	24.63	24.7867	28.3233	31	T6R2	19.91	19.83	21.8167	-1.55	2.92817					1.95658
32	T6R2	24.69			32	T6R2	19.67
33	T6R2	25.04			33	T6R2	19.91
34	T6R3	24.96	24.9367	27.4567	34	T6R3	20.2	20.0033	20.2933	-2.23	4.69134					1.56917
35	T6R3	24.92			35	T6R3	19.7
36	T6R3	24.93			36	T6R3	20.11
37	T24R1	26.67	26.5033	28.3233	37	T24R1	21.41	21.1833	22.2767	-0.726667	1.65481	1.72866	0.104432	7.9454		0.68381	-1.4624	-1.49875	0.0514105
38	T24R1	26.64			38	T24R1	21.03
39	T24R1	26.2			39	T24R1	21.11
40	T24R2	23.9	23.9033	28.3233	40	T24R2	19.16	19.44	21.8167	-2.04333	4.12197					1.18646		-1.49875
41	T24R2	23.91			41	T24R2	19.15
42	T24R2	23.9			42	T24R2	20.01
43	T24R3	26.31	26.6567	27.4567	43	T24R3	20.02	20.3433	20.2933	-0.85	1.8025					0.651423	-1.5351
44	T24R3	26.62			44	T24R3	20.06
45	T24R3	27.04			45	T24R3	20.95

## Sheet: AGO1 QHWT
Gene					Housekeeping gene
ARGONAUTE 1					GAPDH
Sample number	Day/replicate	Ct	AVERAGE Ct	AVERAGE Ct at C0	Sample number	Day/Replicate	Ct	AVERAGE Ct	AVERAGE Ct at C0	ΔΔCT	2^(-ΔΔCT)	Fold Change	Standard Deviation 2^(-ΔΔCT)	Standard Error 2^(-ΔΔCT)
1	QHWT 0 h/Biological sample 1/Replicate 1	31.53	28.3233	28.3233	1	QHWT 0 h/Biological sample 1/Replicate 1	22.18	22.2767	22.2767	0	1	1	0	0
2	QHWT 0 h/Biological sample 1/Replicate 2	29.74			2	QHWT 0 h/Biological sample 1/Replicate 2	22.31
3	QHWT 0 h/Biological sample 1/Replicate 3	29.98			3	QHWT 0 h/Biological sample 1/Replicate 3	22.34
4	QHWT 0 h/Biological sample 2/Replicate 1	28.14	28.3233	28.3233	4	QHWT 0 h/Biological sample 2/Replicate 1	21.4	21.8167	21.8167	0	1
5	QHWT 0 h/Biological sample 2/Replicate 2	28.3			5	QHWT 0 h/Biological sample 2/Replicate 2	21.93
6	QHWT 0 h/Biological sample 2/Replicate 3	28.53			6	QHWT 0 h/Biological sample 2/Replicate 3	22.12
7	QHWT 0 h/Biological sample 3/Replicate 1	27.41	27.4567	27.4567	7	QHWT 0 h/Biological sample 3/Replicate 1	20.23	20.2933	20.2933	0	1
8	QHWT 0 h/Biological sample 3/Replicate 2	27.39			8	QHWT 0 h/Biological sample 3/Replicate 2	20.36
9	QHWT 0 h/Biological sample 3/Replicate 3	27.57			9	QHWT 0 h/Biological sample 3/Replicate 3	20.29
10	QHWT 1 h/Biological sample 1/Replicate 1	26.97	26.7333	28.3233	10	QHWT 1 h/Biological sample 1/Replicate 1	21.01	21.0067	22.2767	-0.32	1.24833	1.35115	0.145411	1.5827
11	QHWT 1 h/Biological sample 1/Replicate 2	26.55			11	QHWT 1 h/Biological sample 1/Replicate 2	20.79
12	QHWT 1 h/Biological sample 1/Replicate 3	26.68			12	QHWT 1 h/Biological sample 1/Replicate 3	21.22
13	QHWT 1 h/Biological sample 2/Replicate 1	26.91	27.0267	28.3233	13	QHWT 1 h/Biological sample 2/Replicate 1	20.98	21.06	21.8167	-0.54	1.45397
14	QHWT 1 h/Biological sample 2/Replicate 2	27.09			14	QHWT 1 h/Biological sample 2/Replicate 2	20.95
15	QHWT 1 h/Biological sample 2/Replicate 3	27.08			15	QHWT 1 h/Biological sample 2/Replicate 3	21.25
16	QHWT 1 h/Biological sample 3/Replicate 1	25.88	25.8533	27.4567	16	QHWT 1 h/Biological sample 3/Replicate 1	20.24	20.44	20.2933	-1.75	3.36359
17	QHWT 1 h/Biological sample 3/Replicate 2	25.53			17	QHWT 1 h/Biological sample 3/Replicate 2	20.19
18	QHWT 1 h/Biological sample 3/Replicate 3	26.15			18	QHWT 1 h/Biological sample 3/Replicate 3	20.89
19	QHWT 3 h/Biological sample 1/Replicate 1	24.98	24.65	28.3233	19	QHWT 3 h/Biological sample 1/Replicate 1	20.1	20.1433	22.2767	-1.54	2.90795	2.87146	0.0516013	0.1933
20	QHWT 3 h/Biological sample 1/Replicate 2	24.34			20	QHWT 3 h/Biological sample 1/Replicate 2	20.11
21	QHWT 3 h/Biological sample 1/Replicate 3	24.63			21	QHWT 3 h/Biological sample 1/Replicate 3	20.22
22	QHWT 3 h/Biological sample 2/Replicate 1	25.05	24.9467	28.3233	22	QHWT 3 h/Biological sample 2/Replicate 1	20.04	19.9433	21.8167	-1.50333	2.83497
23	QHWT 3 h/Biological sample 2/Replicate 2	24.76			23	QHWT 3 h/Biological sample 2/Replicate 2	19.77
24	QHWT 3 h/Biological sample 2/Replicate 3	25.03			24	QHWT 3 h/Biological sample 2/Replicate 3	20.02
25	QHWT 3 h/Biological sample 3/Replicate 1	24.7	24.7633	27.4567	25	QHWT 3 h/Biological sample 3/Replicate 1	20.35	20.1833	20.2933	-2.58333	5.99323
26	QHWT 3 h/Biological sample 3/Replicate 2	24.52			26	QHWT 3 h/Biological sample 3/Replicate 2	19.93
27	QHWT 3 h/Biological sample 3/Replicate 3	25.07			27	QHWT 3 h/Biological sample 3/Replicate 3	20.27
28	QHWT 6 h/Biological sample 1/Replicate 1	25.1	25.14	28.3233	28	QHWT 6 h/Biological sample 1/Replicate 1	20.28	20.35	22.2767	-1.25667	2.38943	2.6588	0.380947	0.7011
29	QHWT 6 h/Biological sample 1/Replicate 2	25.22			29	QHWT 6 h/Biological sample 1/Replicate 2	20.22
30	QHWT 6 h/Biological sample 1/Replicate 3	25.1			30	QHWT 6 h/Biological sample 1/Replicate 3	20.55
31	QHWT 6 h/Biological sample 2/Replicate 1	24.63	24.7867	28.3233	31	QHWT 6 h/Biological sample 2/Replicate 1	19.91	19.83	21.8167	-1.55	2.92817
32	QHWT 6 h/Biological sample 2/Replicate 2	24.69			32	QHWT 6 h/Biological sample 2/Replicate 2	19.67
33	QHWT 6 h/Biological sample 2/Replicate 3	25.04			33	QHWT 6 h/Biological sample 2/Replicate 3	19.91
34	QHWT 6 h/Biological sample 3/Replicate 1	24.96	24.9367	27.4567	34	QHWT 6 h/Biological sample 3/Replicate 1	20.2	20.0033	20.2933	-2.23	4.69134
35	QHWT 6 h/Biological sample 3/Replicate 2	24.92			35	QHWT 6 h/Biological sample 3/Replicate 2	19.7
36	QHWT 6 h/Biological sample 3/Replicate 3	24.93			36	QHWT 6 h/Biological sample 3/Replicate 3	20.11
37	QHWT 24 h/Biological sample 1/Replicate 1	26.67	26.5033	28.3233	37	QHWT 24 h/Biological sample 1/Replicate 1	21.41	21.1833	22.2767	-0.726667	1.65481	1.72866	0.104432	7.9454
38	QHWT 24 h/Biological sample 1/Replicate 2	26.64			38	QHWT 24 h/Biological sample 1/Replicate 2	21.03
39	QHWT 24 h/Biological sample 1/Replicate 3	26.2			39	QHWT 24 h/Biological sample 1/Replicate 3	21.11
40	QHWT 24 h/Biological sample 2/Replicate 1	23.9	23.9033	28.3233	40	QHWT 24 h/Biological sample 2/Replicate 1	19.16	19.44	21.8167	-2.04333	4.12197
41	QHWT 24 h/Biological sample 2/Replicate 2	23.91			41	QHWT 24 h/Biological sample 2/Replicate 2	19.15
42	QHWT 24 h/Biological sample 2/Replicate 3	23.9			42	QHWT 24 h/Biological sample 2/Replicate 3	20.01
43	QHWT 24 h/Biological sample 3/Replicate 1	26.31	26.6567	27.4567	43	QHWT 24 h/Biological sample 3/Replicate 1	20.02	20.3433	20.2933	-0.85	1.8025
44	QHWT 24 h/Biological sample 3/Replicate 2	26.62			44	QHWT 24 h/Biological sample 3/Replicate 2	20.06
45	QHWT 24 h/Biological sample 3/Replicate 3	27.04			45	QHWT 24 h/Biological sample 3/Replicate 3	20.95
Tiempo	ER	DE
T0	1	0
T1	1.35115	0.145411
T3	2.87146	0.0516013
T6	2.6588	0.380947
T24	1.72866	0.104432

## Sheet: DCL1 Control
Gene					Housekeeping gene
DICER 1					GAPDH											EFECTO DEL TH SOBRE EXPRESIÓN GÉNICA
Sample number	Day/replicate	Ct	AVERAGE Ct	AVERAGE Ct at C0	Sample number	Day/Replicate	Ct	AVERAGE Ct	AVERAGE Ct at C0	ΔΔCT	2^(-ΔΔCT)	Fold Change	Standard Deviation 2^(-ΔΔCT)	Standard Error 2^(-ΔΔCT)
1	Control 0 h/Biological sample 1/Replicate 1	30.16	31.545	31.545	1	Control 0 h/Biological sample 1/Replicate 1	20.14	20.175	20.175	0	1	1	0	0		0.355191	-2.81539	-3.22483		0	-3.22483	0.579039
2	Control 0 h/Biological sample 1/Replicate 2	29.73			2	Control 0 h/Biological sample 1/Replicate 2	20.21													1	-4.03739	0.516383
3	Control 0 h/Biological sample 1/Replicate 3	30.73			3	Control 0 h/Biological sample 1/Replicate 3	21.08													3	1.52378	0.640987
4	Control 0 h/Biological sample 2/Replicate 1	31.77	31.545	31.545	4	Control 0 h/Biological sample 2/Replicate 1	20.1	20.0833	20.0833	0	1					0.275158	-3.63427			6	1.04293	0.0623837
5	Control 0 h/Biological sample 2/Replicate 2	32.06			5	Control 0 h/Biological sample 2/Replicate 2	20.03											-3.22483		24	-3.26833	1.28177
6	Control 0 h/Biological sample 2/Replicate 3	31.32			6	Control 0 h/Biological sample 2/Replicate 3	20.12
7	Control 0 h/Biological sample 3/Replicate 1	31.68	31.695	31.695	7	Control 0 h/Biological sample 3/Replicate 1	20.34	20.32	20.32	0	1					0.0860707	-11.6184
8	Control 0 h/Biological sample 3/Replicate 2	31.71			8	Control 0 h/Biological sample 3/Replicate 2	20.3
9	Control 0 h/Biological sample 3/Replicate 3	31.8			9	Control 0 h/Biological sample 3/Replicate 3	20.87
10	Control 1 h/Biological sample 1/Replicate 1	32.23	31.755	31.545	10	Control 1 h/Biological sample 1/Replicate 1	20.74	20.9033	20.175	-0.518333	1.4323	1.97607	0.769009	1.5827		0.272312	-3.67226	-4.03739
11	Control 1 h/Biological sample 1/Replicate 2	31.73			11	Control 1 h/Biological sample 1/Replicate 2	20.76
12	Control 1 h/Biological sample 1/Replicate 3	31.78			12	Control 1 h/Biological sample 1/Replicate 3	21.21
13	Control 1 h/Biological sample 2/Replicate 1	30.37	33.3233	31.545	13	Control 1 h/Biological sample 2/Replicate 1	20.35	20.4167	20.0833	1.445	0.367292					0.880666	-1.1355
14	Control 1 h/Biological sample 2/Replicate 2	30.05			14	Control 1 h/Biological sample 2/Replicate 2	20.44
15	Control 1 h/Biological sample 2/Replicate 3	39.55			15	Control 1 h/Biological sample 2/Replicate 3	20.46
16	Control 1 h/Biological sample 3/Replicate 1	30.23	30.385	31.695	16	Control 1 h/Biological sample 3/Replicate 1	20.3	20.3433	20.32	-1.33333	2.51984					0.227142	-4.40253
17	Control 1 h/Biological sample 3/Replicate 2	30.54			17	Control 1 h/Biological sample 3/Replicate 2	20.2
18	Control 1 h/Biological sample 3/Replicate 3	31.38			18	Control 1 h/Biological sample 3/Replicate 3	20.53
19	Control 3 h/Biological sample 1/Replicate 1	33.94	32.8133	31.545	19	Control 3 h/Biological sample 1/Replicate 1	21.27	21.4033	20.175	0.04	0.972655	2.2697	0.188897	0.1933		1.97703		1.52378
20	Control 3 h/Biological sample 1/Replicate 2	33.12			20	Control 3 h/Biological sample 1/Replicate 2	21.58
21	Control 3 h/Biological sample 1/Replicate 3	33.33			21	Control 3 h/Biological sample 1/Replicate 3	21.36
22	Control 3 h/Biological sample 2/Replicate 1	30.05	30.17	31.545	22	Control 3 h/Biological sample 2/Replicate 1	19.94	19.8033	20.0833	-1.095	2.13613					0.388234	1.52378
23	Control 3 h/Biological sample 2/Replicate 2	30.08			23	Control 3 h/Biological sample 2/Replicate 2	19.65
24	Control 3 h/Biological sample 2/Replicate 3	30.38			24	Control 3 h/Biological sample 2/Replicate 3	19.82
25	Control 3 h/Biological sample 3/Replicate 1	30.35	30.4633	31.695	25	Control 3 h/Biological sample 3/Replicate 1	20.39	20.3533	20.32	-1.265	2.40327					1.07054
26	Control 3 h/Biological sample 3/Replicate 2	30.66			26	Control 3 h/Biological sample 3/Replicate 2	20.29
27	Control 3 h/Biological sample 3/Replicate 3	31.04			27	Control 3 h/Biological sample 3/Replicate 3	20.38
28	Control 6 h/Biological sample 1/Replicate 1	34.56	32.6467	31.545	28	Control 6 h/Biological sample 1/Replicate 1	22.05	22.13	20.175	-0.853333	1.80667	1.10022	0.613382	0.7011		0.972655		1.04293
29	Control 6 h/Biological sample 1/Replicate 2	32.34			29	Control 6 h/Biological sample 1/Replicate 2	22.06
30	Control 6 h/Biological sample 1/Replicate 3	32.32			30	Control 6 h/Biological sample 1/Replicate 3	22.28
31	Control 6 h/Biological sample 2/Replicate 1	35.42	34.235	31.545	31	Control 6 h/Biological sample 2/Replicate 1	22.47	22.435	20.0833	0.338333	0.790955					1.06437
32	Control 6 h/Biological sample 2/Replicate 2	33.05			32	Control 6 h/Biological sample 2/Replicate 2	22.4
33	Control 6 h/Biological sample 2/Replicate 3	NeuN			33	Control 6 h/Biological sample 2/Replicate 3	23.55
34	Control 6 h/Biological sample 3/Replicate 1	31.33	32.19	31.695	34	Control 6 h/Biological sample 3/Replicate 1	20.26	20.3067	20.32	0.508333	0.703034					1.09177
35	Control 6 h/Biological sample 3/Replicate 2	32.09			35	Control 6 h/Biological sample 3/Replicate 2	20.3
36	Control 6 h/Biological sample 3/Replicate 3	30.94			36	Control 6 h/Biological sample 3/Replicate 3	20.36
37	Control 24 h/Biological sample 1/Replicate 1	31.03	31.3533	31.545	37	Control 24 h/Biological sample 1/Replicate 1	20.5	20.3733	20.175	-0.39	1.31039	1.92095	0.863462	7.9454		0.239539	-4.17468	-3.26833
38	Control 24 h/Biological sample 1/Replicate 2	30.68			38	Control 24 h/Biological sample 1/Replicate 2	20.27
39	Control 24 h/Biological sample 1/Replicate 3	32.12			39	Control 24 h/Biological sample 1/Replicate 3	20.35
40	Control 24 h/Biological sample 2/Replicate 1	30.78	30.4533	31.545	40	Control 24 h/Biological sample 2/Replicate 1	21.13	21.13	20.0833	-2.13833	4.40253					0.423373	-2.36199
41	Control 24 h/Biological sample 2/Replicate 2	30.32			41	Control 24 h/Biological sample 2/Replicate 2	21.16
42	Control 24 h/Biological sample 2/Replicate 3	30.26			42	Control 24 h/Biological sample 2/Replicate 3	21.1										-3.26833
43	Control 24 h/Biological sample 3/Replicate 1	29.57	29.91	31.695	43	Control 24 h/Biological sample 3/Replicate 1	19.91	19.875	20.32	-1.34	2.53151					0.011425
44	Control 24 h/Biological sample 3/Replicate 2	30.11			44	Control 24 h/Biological sample 3/Replicate 2	19.84
45	Control 24 h/Biological sample 3/Replicate 3	30.05			45	Control 24 h/Biological sample 3/Replicate 3	20.46
Tiempo	ER	DE
C0	1	0
C1	1.97607	0.769009
C3	2.2697	0.188897
C6	1.10022	0.613382
C24	3.46702	0.863462
MANGOS TRATADOS
Gen de interés					GAPDH
Dicer 1					GAPDH
Formula= [Ct PG-CtGAPDH]dia X- [Ct PG-CtGAPDH]dia 4					Formula= [Ct PG-CtGAPDH]dia X- [Ct PG-CtGAPDH]dia 4
No. Muestra	Día/Réplica	Ct	AVERAGE Ct	AVE Ct et 1	No. Muestra	Día/Réplica	Ct	AVE Ct	AVE Ct MiPG1	ΔΔCT	2^(-ΔΔCT)	Fold Change	SD 2^(-ΔΔCT)	SE 2^(-ΔΔCT)
1	T0R1	35.75	35.14	35.14	1	T0R1	22.18	22.2767	22.2767	0	1	1	0	0
2	T0R1	38.35			2	T0R1	22.31
3	T0R1	NeuN			3	T0R1	22.34
4	T0R2	35.12	35.14	35.14	4	T0R2	21.4	21.8167	21.8167	0	1
5	T0R2	35.11			5	T0R2	21.93
6	T0R2	35.19			6	T0R2	22.12
7	TOR3	36.31	35.2067	35.2067	7	TOR3	20.23	20.2933	20.2933	0	1
8	TOR3	34.1			8	TOR3	20.36
9	TOR3	35.21			9	TOR3	20.29
10	T1R1	34.33	33.735	35.14	10	T1R1	21.01	21.0067	22.2767	-0.13	1.09809	1.13682	0.054769	1.5827
11	T1R1	33.86			11	T1R1	20.79
12	T1R1	33.61			12	T1R1	21.22
13	T1R2	33.1	34.15	35.14	13	T1R2	20.98	21.06	21.8167	-0.23	1.17555
14	T1R2	34.2			14	T1R2	20.95
15	T1R2	34.1			15	T1R2	21.25
16	T1R3	32.61	32.62	35.2067	16	T1R3	20.24	20.44	20.2933	-2.73	6.6499
17	T1R3	32.57			17	T1R3	20.19
18	T1R3	32.68			18	T1R3	20.89
19	T3R1	30.17	30.57	35.14	19	T3R1	20.1	20.1433	22.2767	-2.44	5.41389	4.21393	1.697	0.1933
20	T3R1	30.4			20	T3R1	20.11
21	T3R1	30.74			21	T3R1	20.22
22	T3R2	31.75	31.675	35.14	22	T3R2	20.04	19.9433	21.8167	-1.59	3.01397
23	T3R2	30.94			23	T3R2	19.77
24	T3R2	31.6			24	T3R2	20.02
25	T3R3	31.34	30.195	35.2067	25	T3R3	20.35	20.1833	20.2933	-4.9	29.8916
26	T3R3	30.2			26	T3R3	19.93
27	T3R3	30.19			27	T3R3	20.27
28	T6R1	30.77	30.9067	35.14	28	T6R1	20.28	20.35	22.2767	-2.31	4.94739	4.00348	1.33488	0.7011
29	T6R1	30.83			29	T6R1	20.22
30	T6R1	31.12			30	T6R1	20.55
31	T6R2	31.66	31.54	35.14	31	T6R2	19.91	19.83	21.8167	-1.61	3.05958
32	T6R2	31.42			32	T6R2	19.67
33	T6R2	32.03			33	T6R2	19.91
34	T6R3	31.57	31.76	35.2067	34	T6R3	20.2	20.0033	20.2933	-3.16	8.91767
35	T6R3	31.68			35	T6R3	19.7
36	T6R3	32.03			36	T6R3	20.11
37	T24R1	35.22	34.225	35.14	37	T24R1	21.41	21.1833	22.2767	0.18	0.883723	0.609877	0.387277	7.9454
38	T24R1	34.2			38	T24R1	21.03
39	T24R1	34.25			39	T24R1	21.11
40	T24R2	30.16	30.0033	35.14	40	T24R2	19.16	19.44	21.8167	-2.76	6.77396
41	T24R2	29.87			41	T24R2	19.15
42	T24R2	29.98			42	T24R2	20.01
43	T24R3	NeuN	36.83	35.2067	43	T24R3	20.02	20.3433	20.2933	1.57	0.336031
44	T24R3	NeuN			44	T24R3	20.06
45	T24R3	36.83			45	T24R3	20.95

## Sheet: DCL1 QHWT
Gene					Housekeeping gene
DICER 1					GAPDH
Sample number	Day/replicate	Ct	AVERAGE Ct	AVERAGE Ct at C0	Sample number	Day/Replicate	Ct	AVERAGE Ct	AVERAGE Ct at C0	ΔΔCT	2^(-ΔΔCT)	Fold Change	Standard Deviation 2^(-ΔΔCT)	Standard Error 2^(-ΔΔCT)
1	QHWT 0 h/Biological sample 1/Replicate 1	35.75	35.14	35.14	1	QHWT 0 h/Biological sample 1/Replicate 1	22.18	22.2767	22.2767	0	1	1	0	0
2	QHWT 0 h/Biological sample 1/Replicate 2	38.35			2	QHWT 0 h/Biological sample 1/Replicate 2	22.31
3	QHWT 0 h/Biological sample 1/Replicate 3	NeuN			3	QHWT 0 h/Biological sample 1/Replicate 3	22.34
4	QHWT 0 h/Biological sample 2/Replicate 1	35.12	35.14	35.14	4	QHWT 0 h/Biological sample 2/Replicate 1	21.4	21.8167	21.8167	0	1
5	QHWT 0 h/Biological sample 2/Replicate 2	35.11			5	QHWT 0 h/Biological sample 2/Replicate 2	21.93
6	QHWT 0 h/Biological sample 2/Replicate 3	35.19			6	QHWT 0 h/Biological sample 2/Replicate 3	22.12
7	QHWT 0 h/Biological sample 3/Replicate 1	36.31	35.2067	35.2067	7	QHWT 0 h/Biological sample 3/Replicate 1	20.23	20.2933	20.2933	0	1
8	QHWT 0 h/Biological sample 3/Replicate 2	34.1			8	QHWT 0 h/Biological sample 3/Replicate 2	20.36
9	QHWT 0 h/Biological sample 3/Replicate 3	35.21			9	QHWT 0 h/Biological sample 3/Replicate 3	20.29
10	QHWT 1 h/Biological sample 1/Replicate 1	34.33	33.735	35.14	10	QHWT 1 h/Biological sample 1/Replicate 1	21.01	21.0067	22.2767	-0.135	1.09809	1.13682	0.054769	1.5827
11	QHWT 1 h/Biological sample 1/Replicate 2	33.86			11	QHWT 1 h/Biological sample 1/Replicate 2	20.79
12	QHWT 1 h/Biological sample 1/Replicate 3	33.61			12	QHWT 1 h/Biological sample 1/Replicate 3	21.22
13	QHWT 1 h/Biological sample 2/Replicate 1	33.1	34.15	35.14	13	QHWT 1 h/Biological sample 2/Replicate 1	20.98	21.06	21.8167	-0.233333	1.17555
14	QHWT 1 h/Biological sample 2/Replicate 2	34.2			14	QHWT 1 h/Biological sample 2/Replicate 2	20.95
15	QHWT 1 h/Biological sample 2/Replicate 3	34.1			15	QHWT 1 h/Biological sample 2/Replicate 3	21.25
16	QHWT 1 h/Biological sample 3/Replicate 1	32.61	32.62	35.2067	16	QHWT 1 h/Biological sample 3/Replicate 1	20.24	20.44	20.2933	-2.73333	6.6499
17	QHWT 1 h/Biological sample 3/Replicate 2	32.57			17	QHWT 1 h/Biological sample 3/Replicate 2	20.19
18	QHWT 1 h/Biological sample 3/Replicate 3	32.68			18	QHWT 1 h/Biological sample 3/Replicate 3	20.89
19	QHWT 3 h/Biological sample 1/Replicate 1	30.17	30.57	35.14	19	QHWT 3 h/Biological sample 1/Replicate 1	20.1	20.1433	22.2767	-2.43667	5.41389	4.21393	1.697	0.1933
20	QHWT 3 h/Biological sample 1/Replicate 2	30.4			20	QHWT 3 h/Biological sample 1/Replicate 2	20.11
21	QHWT 3 h/Biological sample 1/Replicate 3	30.74			21	QHWT 3 h/Biological sample 1/Replicate 3	20.22
22	QHWT 3 h/Biological sample 2/Replicate 1	31.75	31.675	35.14	22	QHWT 3 h/Biological sample 2/Replicate 1	20.04	19.9433	21.8167	-1.59167	3.01397
23	QHWT 3 h/Biological sample 2/Replicate 2	30.94			23	QHWT 3 h/Biological sample 2/Replicate 2	19.77
24	QHWT 3 h/Biological sample 2/Replicate 3	31.6			24	QHWT 3 h/Biological sample 2/Replicate 3	20.02
25	QHWT 3 h/Biological sample 3/Replicate 1	31.34	30.195	35.2067	25	QHWT 3 h/Biological sample 3/Replicate 1	20.35	20.1833	20.2933	-4.90167	29.8916
26	QHWT 3 h/Biological sample 3/Replicate 2	30.2			26	QHWT 3 h/Biological sample 3/Replicate 2	19.93
27	QHWT 3 h/Biological sample 3/Replicate 3	30.19			27	QHWT 3 h/Biological sample 3/Replicate 3	20.27
28	QHWT 6 h/Biological sample 1/Replicate 1	30.77	30.9067	35.14	28	QHWT 6 h/Biological sample 1/Replicate 1	20.28	20.35	22.2767	-2.30667	4.94739	4.00348	1.33488	0.7011
29	QHWT 6 h/Biological sample 1/Replicate 2	30.83			29	QHWT 6 h/Biological sample 1/Replicate 2	20.22
30	QHWT 6 h/Biological sample 1/Replicate 3	31.12			30	QHWT 6 h/Biological sample 1/Replicate 3	20.55
31	QHWT 6 h/Biological sample 2/Replicate 1	31.66	31.54	35.14	31	QHWT 6 h/Biological sample 2/Replicate 1	19.91	19.83	21.8167	-1.61333	3.05958
32	QHWT 6 h/Biological sample 2/Replicate 2	31.42			32	QHWT 6 h/Biological sample 2/Replicate 2	19.67
33	QHWT 6 h/Biological sample 2/Replicate 3	32.03			33	QHWT 6 h/Biological sample 2/Replicate 3	19.91
34	QHWT 6 h/Biological sample 3/Replicate 1	31.57	31.76	35.2067	34	QHWT 6 h/Biological sample 3/Replicate 1	20.2	20.0033	20.2933	-3.15667	8.91767
35	QHWT 6 h/Biological sample 3/Replicate 2	31.68			35	QHWT 6 h/Biological sample 3/Replicate 2	19.7
36	QHWT 6 h/Biological sample 3/Replicate 3	32.03			36	QHWT 6 h/Biological sample 3/Replicate 3	20.11
37	QHWT 24 h/Biological sample 1/Replicate 1	35.22	34.225	35.14	37	QHWT 24 h/Biological sample 1/Replicate 1	21.41	21.1833	22.2767	0.178333	0.883723	0.609877	0.387277	7.9454
38	QHWT 24 h/Biological sample 1/Replicate 2	34.2			38	QHWT 24 h/Biological sample 1/Replicate 2	21.03
39	QHWT 24 h/Biological sample 1/Replicate 3	34.25			39	QHWT 24 h/Biological sample 1/Replicate 3	21.11
40	QHWT 24 h/Biological sample 2/Replicate 1	30.16	30.0033	35.14	40	QHWT 24 h/Biological sample 2/Replicate 1	19.16	19.44	21.8167	-2.76	6.77396
41	QHWT 24 h/Biological sample 2/Replicate 2	29.87			41	QHWT 24 h/Biological sample 2/Replicate 2	19.15
42	QHWT 24 h/Biological sample 2/Replicate 3	29.98			42	QHWT 24 h/Biological sample 2/Replicate 3	20.01
43	QHWT 24 h/Biological sample 3/Replicate 1	NeuN	36.83	35.2067	43	QHWT 24 h/Biological sample 3/Replicate 1	20.02	20.3433	20.2933	1.57333	0.336031
44	QHWT 24 h/Biological sample 3/Replicate 2	NeuN			44	QHWT 24 h/Biological sample 3/Replicate 2	20.06
45	QHWT 24 h/Biological sample 3/Replicate 3	36.83			45	QHWT 24 h/Biological sample 3/Replicate 3	20.95
Tiempo	ER	DE
T0	1	0
T1	5.38832	1.78415
T3	25.1187	6.7498
T6	5.98862	4.14229
T24	5.04754	2.44153

## Sheet: HST Control
Gene					Housekeeping gene
HST					GAPDH											EFECTO DEL TRATAMIENTO HIDROTÉRMICO EN LA EXPRESIÓN GÉNICA
Sample number	Day/replicate	Ct	AVERAGE Ct	AVERAGE Ct at C0	Sample number	Day/Replicate	Ct	AVERAGE Ct	AVERAGE Ct at C0	ΔΔCT	2^(-ΔΔCT)	Fold Change	Standard Deviation 2^(-ΔΔCT)	Standard Error 2^(-ΔΔCT)		Cambio en la expresión		Promedio	Triplicado faltante			DE
1	Control 0 h/Biological sample 1/Replicate 1	29.11	29.3333	29.3333	1	Control 0 h/Biological sample 1/Replicate 1	20.14	20.175	20.175	0	1	1	0	0		0.0455944	-21.9325	-23.2471		0	-23.2471	1.85905
2	Control 0 h/Biological sample 1/Replicate 2	29.28			2	Control 0 h/Biological sample 1/Replicate 2	20.21													1	-4.1841	1.30113
3	Control 0 h/Biological sample 1/Replicate 3	29.61			3	Control 0 h/Biological sample 1/Replicate 3	21.08													3	1.71201	0.610292
4	Control 0 h/Biological sample 2/Replicate 1	29.48	29.7733	29.7733	4	Control 0 h/Biological sample 2/Replicate 1	20.1	20.0833	20.0833	0	1					0.137897	-7.25177			6	2.27871	0.552909
5	Control 0 h/Biological sample 2/Replicate 2	30.05			5	Control 0 h/Biological sample 2/Replicate 2	20.03													24	-3.09112	2.29378
6	Control 0 h/Biological sample 2/Replicate 3	29.79			6	Control 0 h/Biological sample 2/Replicate 3	20.12
7	Control 0 h/Biological sample 3/Replicate 1	32.05	29.7733	29.7733	7	Control 0 h/Biological sample 3/Replicate 1	20.34	20.32	20.32	0	1					0.0407139	-24.5616
8	Control 0 h/Biological sample 3/Replicate 2	31.1			8	Control 0 h/Biological sample 3/Replicate 2	20.3
9	Control 0 h/Biological sample 3/Replicate 3	31.17			9	Control 0 h/Biological sample 3/Replicate 3	20.87
10	Control 1 h/Biological sample 1/Replicate 1	33.04	32.5267	29.3333	10	Control 1 h/Biological sample 1/Replicate 1	20.74	20.75	20.175	2.61833	0.162856	1.92518	0.564152	1.5827		1.47257		-4.1841
11	Control 1 h/Biological sample 1/Replicate 2	31.78			11	Control 1 h/Biological sample 1/Replicate 2	20.76
12	Control 1 h/Biological sample 1/Replicate 3	32.76			12	Control 1 h/Biological sample 1/Replicate 3	21.21
13	Control 1 h/Biological sample 2/Replicate 1	28.75	28.89	29.7733	13	Control 1 h/Biological sample 2/Replicate 1	20.35	20.4167	20.0833	-1.21667	2.32409					0.19592	-5.10414		-4.1841
14	Control 1 h/Biological sample 2/Replicate 2	28.92			14	Control 1 h/Biological sample 2/Replicate 2	20.44
15	Control 1 h/Biological sample 2/Replicate 3	29			15	Control 1 h/Biological sample 2/Replicate 3	20.46
16	Control 1 h/Biological sample 3/Replicate 1	28.98	29.1867	29.7733	16	Control 1 h/Biological sample 3/Replicate 1	20.3	20.3433	20.32	-0.61	1.52626					0.306367	-3.26406
17	Control 1 h/Biological sample 3/Replicate 2	29.09			17	Control 1 h/Biological sample 3/Replicate 2	20.2
18	Control 1 h/Biological sample 3/Replicate 3	29.49			18	Control 1 h/Biological sample 3/Replicate 3	20.53
19	Control 3 h/Biological sample 1/Replicate 1	31.96	31.7967	29.3333	19	Control 3 h/Biological sample 1/Replicate 1	21.27	21.4033	20.175	1.235	0.424842	1.60781	0.667944	0.1933		2.14355		1.71201
20	Control 3 h/Biological sample 1/Replicate 2	32.22			20	Control 3 h/Biological sample 1/Replicate 2	21.58
21	Control 3 h/Biological sample 1/Replicate 3	31.21			21	Control 3 h/Biological sample 1/Replicate 3	21.36
22	Control 3 h/Biological sample 2/Replicate 1	28.3	28.4367	29.7733	22	Control 3 h/Biological sample 2/Replicate 1	19.94	19.8033	20.0833	-1.05667	2.08012					0.323836			1.71201
23	Control 3 h/Biological sample 2/Replicate 2	28.52			23	Control 3 h/Biological sample 2/Replicate 2	19.65
24	Control 3 h/Biological sample 2/Replicate 3	28.49			24	Control 3 h/Biological sample 2/Replicate 3	19.82
25	Control 3 h/Biological sample 3/Replicate 1	29.56	29.6233	29.7733	25	Control 3 h/Biological sample 3/Replicate 1	20.39	20.3533	20.32	-0.183333	1.1355					1.28046
26	Control 3 h/Biological sample 3/Replicate 2	29.98			26	Control 3 h/Biological sample 3/Replicate 2	20.29
27	Control 3 h/Biological sample 3/Replicate 3	29.33			27	Control 3 h/Biological sample 3/Replicate 3	20.38
28	Control 6 h/Biological sample 1/Replicate 1	32.23	32.3467	29.3333	28	Control 6 h/Biological sample 1/Replicate 1	22.05	22.13	20.175	1.05833	0.480186	0.441754	0.0543522	0.7011		1.88775		2.27871
29	Control 6 h/Biological sample 1/Replicate 2	32.22			29	Control 6 h/Biological sample 1/Replicate 2	22.06
30	Control 6 h/Biological sample 1/Replicate 3	32.59			30	Control 6 h/Biological sample 1/Replicate 3	22.28
31	Control 6 h/Biological sample 2/Replicate 1	33.58	33.435	29.7733	31	Control 6 h/Biological sample 2/Replicate 1	22.47	22.435	20.0833	1.31	0.403321					6.46806
32	Control 6 h/Biological sample 2/Replicate 2	33.29			32	Control 6 h/Biological sample 2/Replicate 2	22.4
33	Control 6 h/Biological sample 2/Replicate 3	32.32			33	Control 6 h/Biological sample 2/Replicate 3	23.55
34	Control 6 h/Biological sample 3/Replicate 1	30.19	30.1667	29.7733	34	Control 6 h/Biological sample 3/Replicate 1	20.26	20.3067	20.32	0.406667	0.754364					2.66968
35	Control 6 h/Biological sample 3/Replicate 2	30.18			35	Control 6 h/Biological sample 3/Replicate 2	20.3
36	Control 6 h/Biological sample 3/Replicate 3	30.13			36	Control 6 h/Biological sample 3/Replicate 3	20.36
37	Control 24 h/Biological sample 1/Replicate 1	29.8	30.01	29.3333	37	Control 24 h/Biological sample 1/Replicate 1	20.5	20.3733	20.175	0.478333	0.717806	1.54344	0.201157	7.9454		0.680657	-1.46917	-3.09112
38	Control 24 h/Biological sample 1/Replicate 2	30.22			38	Control 24 h/Biological sample 1/Replicate 2	20.27
39	Control 24 h/Biological sample 1/Replicate 3	29.59			39	Control 24 h/Biological sample 1/Replicate 3	20.35
40	Control 24 h/Biological sample 2/Replicate 1	30.02	30.3333	29.7733	40	Control 24 h/Biological sample 2/Replicate 1	21.13	21.13	20.0833	-0.486667	1.4012					1.43727			-3.09112
41	Control 24 h/Biological sample 2/Replicate 2	30.64			41	Control 24 h/Biological sample 2/Replicate 2	21.16
42	Control 24 h/Biological sample 2/Replicate 3	30.34			42	Control 24 h/Biological sample 2/Replicate 3	21.1
43	Control 24 h/Biological sample 3/Replicate 1	28.72	28.575	29.7733	43	Control 24 h/Biological sample 3/Replicate 1	19.91	19.875	20.32	-0.753333	1.68568					0.212176	-4.71307
44	Control 24 h/Biological sample 3/Replicate 2	28.43			44	Control 24 h/Biological sample 3/Replicate 2	19.84
45	Control 24 h/Biological sample 3/Replicate 3	29.13			45	Control 24 h/Biological sample 3/Replicate 3	20.46
Tiempo	ER	DE
C0	1	0
C1	1.92518	0.564152
C3	1.60781	0.667944
C6	0.441754	0.0543522
C24	1.54344	0.201157
MANGOS TRATADOS
Gen de interés					GAPDH
HASTY					GAPDH
Formula= [Ct PG-CtGAPDH]dia X- [Ct PG-CtGAPDH]dia 4					Formula= [Ct PG-CtGAPDH]dia X- [Ct PG-CtGAPDH]dia 4
No. Muestra	Día/Réplica	Ct	AVERAGE Ct	AVE Ct et 1	No. Muestra	Día/Réplica	Ct	AVE Ct	AVE Ct MiPG1	ΔΔCT	2^(-ΔΔCT)	Fold Change	SD 2^(-ΔΔCT)	SE 2^(-ΔΔCT)
1	T0R1	NeuN	35.89	35.89	1	T0R1	22.18	22.2767	22.2767	0	1	1	0	0
2	T0R1	NeuN			2	T0R1	22.31
3	T0R1	35.89			3	T0R1	22.34
4	T0R2	33.52	34.365	34.365	4	T0R2	21.4	21.8167	21.8167	0	1
5	T0R2	35.21			5	T0R2	21.93
6	T0R2	34.95			6	T0R2	22.12
7	TOR3	32.02	34.365	34.365	7	TOR3	20.23	20.2933	20.2933	0	1
8	TOR3	33.51			8	TOR3	20.36
9	TOR3	32.42			9	TOR3	20.29
10	T1R1	32.09	32.225	35.89	10	T1R1	21.01	21.0067	22.2767	-2.395	5.25977	4.28088	1.38436	1.5827
11	T1R1	31.92			11	T1R1	20.79
12	T1R1	32.53			12	T1R1	21.22
13	T1R2	31.81	31.885	34.365	13	T1R2	20.98	21.06	21.8167	-1.72333	3.30198
14	T1R2	NeuN			14	T1R2	20.95
15	T1R2	31.96			15	T1R2	21.25
16	T1R3	31.05	30.99	34.365	16	T1R3	20.24	20.44	20.2933	-3.52167	11.4849
17	T1R3	30.88			17	T1R3	20.19
18	T1R3	31.04			18	T1R3	20.89
19	T3R1	29.12	29.4367	35.89	19	T3R1	20.1	20.1433	22.2767	-4.32	19.9733	27.8426	11.1289	0.1933
20	T3R1	29.4			20	T3R1	20.11
21	T3R1	29.79			21	T3R1	20.22
22	T3R2	30.2	30.2033	34.365	22	T3R2	20.04	19.9433	21.8167	-2.28833	4.88491
23	T3R2	30.08			23	T3R2	19.77
24	T3R2	30.33			24	T3R2	20.02
25	T3R3	29.11	29.0967	34.365	25	T3R3	20.35	20.1833	20.2933	-5.15833	35.7119
26	T3R3	29.21			26	T3R3	19.93
27	T3R3	28.97			27	T3R3	20.27
28	T6R1	30.13	29.65	35.89	28	T6R1	20.28	20.35	22.2767	-4.31333	19.8812	19.3995	0.681284	0.7011
29	T6R1	NeuN			29	T6R1	20.22
30	T6R1	29.17			30	T6R1	20.55
31	T6R2	28.25	28.1367	34.365	31	T6R2	19.91	19.83	21.8167	-4.24167	18.9177
32	T6R2	27.97			32	T6R2	19.67
33	T6R2	28.19			33	T6R2	19.91
34	T6R3	28.53	28.4467	34.365	34	T6R3	20.2	20.0033	20.2933	-5.62833	49.4649
35	T6R3	28.36			35	T6R3	19.7
36	T6R3	28.45			36	T6R3	20.11
37	T24R1	31.41	31.375	35.89	37	T24R1	21.41	21.1833	22.2767	-3.42167	10.7158	9.75027	1.36546	7.9454
38	T24R1	30.44			38	T24R1	21.03
39	T24R1	31.34			39	T24R1	21.11
40	T24R2	28.27	28.12	34.365	40	T24R2	19.16	19.44	21.8167	-3.86833	14.6044
41	T24R2	27.99			41	T24R2	19.15
42	T24R2	28.1			42	T24R2	20.01
43	T24R3	31.94	31.28	34.365	43	T24R3	20.02	20.3433	20.2933	-3.135	8.78474
44	T24R3	30.44			44	T24R3	20.06
45	T24R3	31.46			45	T24R3	20.95

## Sheet: HST QHWT
Gene					Housekeeping gene
HST					GAPDH
Sample number	Day/replicate	Ct	AVERAGE Ct	AVERAGE Ct at C0	Sample number	Day/Replicate	Ct	AVERAGE Ct	AVERAGE Ct at C0	ΔΔCT	2^(-ΔΔCT)	Fold Change	Standard Deviation 2^(-ΔΔCT)	Standard Error 2^(-ΔΔCT)
1	QHWT 0 h/Biological sample 1/Replicate 1	NeuN	35.89	35.89	1	QHWT 0 h/Biological sample 1/Replicate 1	22.18	22.2767	22.2767	0	1	1	0	0
2	QHWT 0 h/Biological sample 1/Replicate 2	NeuN			2	QHWT 0 h/Biological sample 1/Replicate 2	22.31
3	QHWT 0 h/Biological sample 1/Replicate 3	35.89			3	QHWT 0 h/Biological sample 1/Replicate 3	22.34
4	QHWT 0 h/Biological sample 2/Replicate 1	33.52	34.365	34.365	4	QHWT 0 h/Biological sample 2/Replicate 1	21.4	21.8167	21.8167	0	1
5	QHWT 0 h/Biological sample 2/Replicate 2	35.21			5	QHWT 0 h/Biological sample 2/Replicate 2	21.93
6	QHWT 0 h/Biological sample 2/Replicate 3	34.95			6	QHWT 0 h/Biological sample 2/Replicate 3	22.12
7	QHWT 0 h/Biological sample 3/Replicate 1	32.02	34.365	34.365	7	QHWT 0 h/Biological sample 3/Replicate 1	20.23	20.2933	20.2933	0	1
8	QHWT 0 h/Biological sample 3/Replicate 2	33.51			8	QHWT 0 h/Biological sample 3/Replicate 2	20.36
9	QHWT 0 h/Biological sample 3/Replicate 3	32.42			9	QHWT 0 h/Biological sample 3/Replicate 3	20.29
10	QHWT 1 h/Biological sample 1/Replicate 1	32.09	32.225	35.89	10	QHWT 1 h/Biological sample 1/Replicate 1	21.01	21.0067	22.2767	-2.395	5.25977	4.28088	1.38436	1.5827
11	QHWT 1 h/Biological sample 1/Replicate 2	31.92			11	QHWT 1 h/Biological sample 1/Replicate 2	20.79
12	QHWT 1 h/Biological sample 1/Replicate 3	32.53			12	QHWT 1 h/Biological sample 1/Replicate 3	21.22
13	QHWT 1 h/Biological sample 2/Replicate 1	31.81	31.885	34.365	13	QHWT 1 h/Biological sample 2/Replicate 1	20.98	21.06	21.8167	-1.72333	3.30198
14	QHWT 1 h/Biological sample 2/Replicate 2	NeuN			14	QHWT 1 h/Biological sample 2/Replicate 2	20.95
15	QHWT 1 h/Biological sample 2/Replicate 3	31.96			15	QHWT 1 h/Biological sample 2/Replicate 3	21.25
16	QHWT 1 h/Biological sample 3/Replicate 1	31.05	30.99	34.365	16	QHWT 1 h/Biological sample 3/Replicate 1	20.24	20.44	20.2933	-3.52167	11.4849
17	QHWT 1 h/Biological sample 3/Replicate 2	30.88			17	QHWT 1 h/Biological sample 3/Replicate 2	20.19
18	QHWT 1 h/Biological sample 3/Replicate 3	31.04			18	QHWT 1 h/Biological sample 3/Replicate 3	20.89
19	QHWT 3 h/Biological sample 1/Replicate 1	29.12	29.4367	35.89	19	QHWT 3 h/Biological sample 1/Replicate 1	20.1	20.1433	22.2767	-4.32	19.9733	27.8426	11.1289	0.1933
20	QHWT 3 h/Biological sample 1/Replicate 2	29.4			20	QHWT 3 h/Biological sample 1/Replicate 2	20.11
21	QHWT 3 h/Biological sample 1/Replicate 3	29.79			21	QHWT 3 h/Biological sample 1/Replicate 3	20.22
22	QHWT 3 h/Biological sample 2/Replicate 1	30.2	30.2033	34.365	22	QHWT 3 h/Biological sample 2/Replicate 1	20.04	19.9433	21.8167	-2.28833	4.88491
23	QHWT 3 h/Biological sample 2/Replicate 2	30.08			23	QHWT 3 h/Biological sample 2/Replicate 2	19.77
24	QHWT 3 h/Biological sample 2/Replicate 3	30.33			24	QHWT 3 h/Biological sample 2/Replicate 3	20.02
25	QHWT 3 h/Biological sample 3/Replicate 1	29.11	29.0967	34.365	25	QHWT 3 h/Biological sample 3/Replicate 1	20.35	20.1833	20.2933	-5.15833	35.7119
26	QHWT 3 h/Biological sample 3/Replicate 2	29.21			26	QHWT 3 h/Biological sample 3/Replicate 2	19.93
27	QHWT 3 h/Biological sample 3/Replicate 3	28.97			27	QHWT 3 h/Biological sample 3/Replicate 3	20.27
28	QHWT 6 h/Biological sample 1/Replicate 1	30.13	29.65	35.89	28	QHWT 6 h/Biological sample 1/Replicate 1	20.28	20.35	22.2767	-4.31333	19.8812	19.3995	0.681284	0.7011
29	QHWT 6 h/Biological sample 1/Replicate 2	NeuN			29	QHWT 6 h/Biological sample 1/Replicate 2	20.22
30	QHWT 6 h/Biological sample 1/Replicate 3	29.17			30	QHWT 6 h/Biological sample 1/Replicate 3	20.55
31	QHWT 6 h/Biological sample 2/Replicate 1	28.25	28.1367	34.365	31	QHWT 6 h/Biological sample 2/Replicate 1	19.91	19.83	21.8167	-4.24167	18.9177
32	QHWT 6 h/Biological sample 2/Replicate 2	27.97			32	QHWT 6 h/Biological sample 2/Replicate 2	19.67
33	QHWT 6 h/Biological sample 2/Replicate 3	28.19			33	QHWT 6 h/Biological sample 2/Replicate 3	19.91
34	QHWT 6 h/Biological sample 3/Replicate 1	28.53	28.4467	34.365	34	QHWT 6 h/Biological sample 3/Replicate 1	20.2	20.0033	20.2933	-5.62833	49.4649
35	QHWT 6 h/Biological sample 3/Replicate 2	28.36			35	QHWT 6 h/Biological sample 3/Replicate 2	19.7
36	QHWT 6 h/Biological sample 3/Replicate 3	28.45			36	QHWT 6 h/Biological sample 3/Replicate 3	20.11
37	QHWT 24 h/Biological sample 1/Replicate 1	31.41	31.375	35.89	37	QHWT 24 h/Biological sample 1/Replicate 1	21.41	21.1833	22.2767	-3.42167	10.7158	9.75027	1.36546	7.9454
38	QHWT 24 h/Biological sample 1/Replicate 2	30.44			38	QHWT 24 h/Biological sample 1/Replicate 2	21.03
39	QHWT 24 h/Biological sample 1/Replicate 3	31.34			39	QHWT 24 h/Biological sample 1/Replicate 3	21.11
40	QHWT 24 h/Biological sample 2/Replicate 1	28.27	28.12	34.365	40	QHWT 24 h/Biological sample 2/Replicate 1	19.16	19.44	21.8167	-3.86833	14.6044
41	QHWT 24 h/Biological sample 2/Replicate 2	27.99			41	QHWT 24 h/Biological sample 2/Replicate 2	19.15
42	QHWT 24 h/Biological sample 2/Replicate 3	28.1			42	QHWT 24 h/Biological sample 2/Replicate 3	20.01
43	QHWT 24 h/Biological sample 3/Replicate 1	31.94	31.28	34.365	43	QHWT 24 h/Biological sample 3/Replicate 1	20.02	20.3433	20.2933	-3.135	8.78474
44	QHWT 24 h/Biological sample 3/Replicate 2	30.44			44	QHWT 24 h/Biological sample 3/Replicate 2	20.06
45	QHWT 24 h/Biological sample 3/Replicate 3	31.46			45	QHWT 24 h/Biological sample 3/Replicate 3	20.95
Tiempo	ER	DE
T0	1	0
T1	4.28088	1.38436
T3	27.8426	11.1289								Day
T6	19.3995	0.681284
T24	9.75027	1.36546

## Sheet: HEN1 Control
Gene					Housekeeping gene
HEN1					GAPDH											EFECTO DEL TRATAMIENTO HIDROTÉRMICO EN LA EXPRESIÓN GÉNICA
Sample number	Day/replicate	Ct	AVERAGE Ct	AVERAGE Ct at C0	Sample number	Day/Replicate	Ct	AVERAGE Ct	AVERAGE Ct at C0	ΔΔCT	2^(-ΔΔCT)	Fold Change	Standard Deviation 2^(-ΔΔCT)	Standard Error 2^(-ΔΔCT)		Cambios en la expresión		Promedio				DE
1	Control 0 h/Biological sample 1/Replicate 1	29.98	31.345	31.345	1	Control 0 h/Biological sample 1/Replicate 1	20.14	20.175	20.175	0	1	1	0	0		0.470304	-2.12628	-2.43551		0	-2.43551	0.437312
2	Control 0 h/Biological sample 1/Replicate 2	30.19			2	Control 0 h/Biological sample 1/Replicate 2	20.21													1	-3.42818	1.15891
3	Control 0 h/Biological sample 1/Replicate 3	30.31			3	Control 0 h/Biological sample 1/Replicate 3	21.08													3	3.15043	1.2474
4	Control 0 h/Biological sample 2/Replicate 1	30.46	31.345	31.345	4	Control 0 h/Biological sample 2/Replicate 1	20.1	20.0833	20.0833	0	1					0.364334	-2.74473	-2.43551		6	3.24012	0.806719
5	Control 0 h/Biological sample 2/Replicate 2	31.39			5	Control 0 h/Biological sample 2/Replicate 2	20.03													24	1.5713	0.567338
6	Control 0 h/Biological sample 2/Replicate 3	31.3			6	Control 0 h/Biological sample 2/Replicate 3	20.12
7	Control 0 h/Biological sample 3/Replicate 1	31.42	31.4	31.4	7	Control 0 h/Biological sample 3/Replicate 1	20.34	20.32	20.32	0	1					0.126161	-7.9264
8	Control 0 h/Biological sample 3/Replicate 2	31.47			8	Control 0 h/Biological sample 3/Replicate 2	20.3
9	Control 0 h/Biological sample 3/Replicate 3	31.31			9	Control 0 h/Biological sample 3/Replicate 3	20.87
10	Control 1 h/Biological sample 1/Replicate 1	33.43	33.06	31.345	10	Control 1 h/Biological sample 1/Replicate 1	20.74	20.75	20.175	1.14	0.45376	2.13967	0.322128	1.5827		0.383332	-2.6087	-3.42818
11	Control 1 h/Biological sample 1/Replicate 2	35.04			11	Control 1 h/Biological sample 1/Replicate 2	20.76
12	Control 1 h/Biological sample 1/Replicate 3	32.69			12	Control 1 h/Biological sample 1/Replicate 3	21.21
13	Control 1 h/Biological sample 2/Replicate 1	30.05	30.7433	31.345	13	Control 1 h/Biological sample 2/Replicate 1	20.35	20.4167	20.0833	-0.935	1.91189					1564.7	-3.42818
14	Control 1 h/Biological sample 2/Replicate 2	30.69			14	Control 1 h/Biological sample 2/Replicate 2	20.44
15	Control 1 h/Biological sample 2/Replicate 3	31.49			15	Control 1 h/Biological sample 2/Replicate 3	20.46
16	Control 1 h/Biological sample 3/Replicate 1	30.24	30.18	31.4	16	Control 1 h/Biological sample 3/Replicate 1	20.3	20.3433	20.32	-1.24333	2.36745					0.235424	-4.24766
17	Control 1 h/Biological sample 3/Replicate 2	30.12			17	Control 1 h/Biological sample 3/Replicate 2	20.2
18	Control 1 h/Biological sample 3/Replicate 3	30.79			18	Control 1 h/Biological sample 3/Replicate 3	20.53
19	Control 3 h/Biological sample 1/Replicate 1	33.43	33.435	31.345	19	Control 3 h/Biological sample 1/Replicate 1	21.27	21.4033	20.175	0.861667	0.550316	1.77309	0.410516	0.1933		4.03248		3.15043
20	Control 3 h/Biological sample 1/Replicate 2	33.44			20	Control 3 h/Biological sample 1/Replicate 2	21.58
21	Control 3 h/Biological sample 1/Replicate 3	34.45			21	Control 3 h/Biological sample 1/Replicate 3	21.36
22	Control 3 h/Biological sample 2/Replicate 1	30.11	30.02	31.345	22	Control 3 h/Biological sample 2/Replicate 1	19.94	19.8033	20.0833	-1.045	2.06337					0.716978	3.15043
23	Control 3 h/Biological sample 2/Replicate 2	29.92			23	Control 3 h/Biological sample 2/Replicate 2	19.65
24	Control 3 h/Biological sample 2/Replicate 3	30.03			24	Control 3 h/Biological sample 2/Replicate 3	19.82
25	Control 3 h/Biological sample 3/Replicate 1	30.86	30.865	31.4	25	Control 3 h/Biological sample 3/Replicate 1	20.39	20.3533	20.32	-0.568333	1.48281					2.26839
26	Control 3 h/Biological sample 3/Replicate 2	30.87			26	Control 3 h/Biological sample 3/Replicate 2	20.29
27	Control 3 h/Biological sample 3/Replicate 3	30.27			27	Control 3 h/Biological sample 3/Replicate 3	20.38
28	Control 6 h/Biological sample 1/Replicate 1	32.69	32.7967	31.345	28	Control 6 h/Biological sample 1/Replicate 1	22.05	22.13	20.175	-0.503333	1.41748	1.21358	0.0208174	0.7011		116.7		3.24012
29	Control 6 h/Biological sample 1/Replicate 2	32.67			29	Control 6 h/Biological sample 1/Replicate 2	22.06
30	Control 6 h/Biological sample 1/Replicate 3	33.03			30	Control 6 h/Biological sample 1/Replicate 3	22.28
31	Control 6 h/Biological sample 2/Replicate 1	33.54	33.435	31.345	31	Control 6 h/Biological sample 2/Replicate 1	22.47	22.435	20.0833	-0.261667	1.19886					3.81055
32	Control 6 h/Biological sample 2/Replicate 2	34.14			32	Control 6 h/Biological sample 2/Replicate 2	22.4										3.24012
33	Control 6 h/Biological sample 2/Replicate 3	33.33			33	Control 6 h/Biological sample 2/Replicate 3	23.55
34	Control 6 h/Biological sample 3/Replicate 1	31.15	31.09	31.4	34	Control 6 h/Biological sample 3/Replicate 1	20.26	20.3067	20.32	-0.296667	1.2283					2.66968
35	Control 6 h/Biological sample 3/Replicate 2	30.86			35	Control 6 h/Biological sample 3/Replicate 2	20.3
36	Control 6 h/Biological sample 3/Replicate 3	31.26			36	Control 6 h/Biological sample 3/Replicate 3	20.36
37	Control 24 h/Biological sample 1/Replicate 1	31.44	31.4367	31.345	37	Control 24 h/Biological sample 1/Replicate 1	20.5	20.3733	20.175	-0.106667	1.07674	0.734323	0.0957044	7.9454		1.17013		1.5713
38	Control 24 h/Biological sample 1/Replicate 2	31.67			38	Control 24 h/Biological sample 1/Replicate 2	20.27
39	Control 24 h/Biological sample 1/Replicate 3	31.2			39	Control 24 h/Biological sample 1/Replicate 3	20.35
40	Control 24 h/Biological sample 2/Replicate 1	32.65	32.71	31.345	40	Control 24 h/Biological sample 2/Replicate 1	21.13	21.13	20.0833	0.318333	0.801996					1.97247
41	Control 24 h/Biological sample 2/Replicate 2	33.07			41	Control 24 h/Biological sample 2/Replicate 2	21.16
42	Control 24 h/Biological sample 2/Replicate 3	32.41			42	Control 24 h/Biological sample 2/Replicate 3	21.1										1.5713
43	Control 24 h/Biological sample 3/Replicate 1	31.37	31.54	31.4	43	Control 24 h/Biological sample 3/Replicate 1	19.91	19.875	20.32	0.585	0.666649					0.239539
44	Control 24 h/Biological sample 3/Replicate 2	30.88			44	Control 24 h/Biological sample 3/Replicate 2	19.84
45	Control 24 h/Biological sample 3/Replicate 3	31.71			45	Control 24 h/Biological sample 3/Replicate 3	20.46
Tiempo	ER	DE
C0	1	0
C1	2.13967	0.322128
C3	1.77309	0.410516
C6	1.21358	0.0208174
C24	0.734323	0.0957044
MANGOS TRATADOS
Gen de interés					GAPDH
HASTY					GAPDH
Formula= [Ct PG-CtGAPDH]dia X- [Ct PG-CtGAPDH]dia 4					Formula= [Ct PG-CtGAPDH]dia X- [Ct PG-CtGAPDH]dia 4
No. Muestra	Día/Réplica	Ct	AVERAGE Ct	AVE Ct et 1	No. Muestra	Día/Réplica	Ct	AVE Ct	AVE Ct MiPG1	ΔΔCT	2^(-ΔΔCT)	Fold Change	SD 2^(-ΔΔCT)	SE 2^(-ΔΔCT)
1	T0R1	NeuN	34.535	34.535	1	T0R1	22.18	22.2767	22.2767	0	1	1	0	0
2	T0R1	36.28			2	T0R1	22.31
3	T0R1	NeuN			3	T0R1	22.34
4	T0R2	NeuN	34.535	34.535	4	T0R2	21.4	21.8167	21.8167	0	1
5	T0R2	34.83			5	T0R2	21.93
6	T0R2	34.24			6	T0R2	22.12
7	TOR3	34.29	34.36	34.36	7	TOR3	20.23	20.2933	20.2933	0	1
8	TOR3	34.66			8	TOR3	20.36
9	TOR3	34.13			9	TOR3	20.29
10	T1R1	34.93	34.7	34.535	10	T1R1	21.01	21.0067	22.2767	1.44	0.369847	2.39383	2.86235	1.5827
11	T1R1	34.47			11	T1R1	20.79
12	T1R1	33.19			12	T1R1	21.22
13	T1R2	20.71	20.775	34.535	13	T1R2	20.98	21.06	21.8167	-13	8210.95
14	T1R2	19.27			14	T1R2	20.95
15	T1R2	20.84			15	T1R2	21.25
16	T1R3	32.22	32.3633	34.36	16	T1R3	20.24	20.44	20.2933	-2.14	4.41782
17	T1R3	32.4			17	T1R3	20.19
18	T1R3	32.47			18	T1R3	20.89
19	T3R1	29.93	30.1633	34.535	19	T3R1	20.1	20.1433	22.2767	-2.24	4.71852	4.38952	0.465269	0.1933
20	T3R1	30.11			20	T3R1	20.11
21	T3R1	30.45			21	T3R1	20.22
22	T3R2	30.53	30.64	34.535	22	T3R2	20.04	19.9433	21.8167	-2.02	4.06053
23	T3R2	30.51			23	T3R2	19.77
24	T3R2	30.88			24	T3R2	20.02
25	T3R3	29.68	29.5133	34.36	25	T3R3	20.35	20.1833	20.2933	-4.74	26.6611
26	T3R3	29.35			26	T3R3	19.93
27	T3R3	29.51			27	T3R3	20.27
28	T6R1	29.21	24.15	34.535	28	T6R1	20.28	20.35	22.2767	-8.46	351.732	19.2655	9.51287	0.7011
29	T6R1	24.62			29	T6R1	20.22
30	T6R1	23.68			30	T6R1	20.55
31	T6R2	28.89	28.9	34.535	31	T6R2	19.91	19.83	21.8167	-3.65	12.5389
32	T6R2	28.7			32	T6R2	19.67
33	T6R2	29.11			33	T6R2	19.91
34	T6R3	29.46	29.37	34.36	34	T6R3	20.2	20.0033	20.2933	-4.7	25.9921
35	T6R3	28.75			35	T6R3	19.7
36	T6R3	29.28			36	T6R3	20.11
37	T24R1	32.35	32.02	34.535	37	T24R1	21.41	21.1833	22.2767	-1.42	2.67895	1.97235	0.999277	7.9454
38	T24R1	31.69			38	T24R1	21.03
39	T24R1	30.73			39	T24R1	21.11
40	T24R2	30.37	30.04	34.535	40	T24R2	19.16	19.44	21.8167	-2.12	4.34192
41	T24R2	29.71			41	T24R2	19.15
42	T24R2	29.16			42	T24R2	20.01
43	T24R3	34.07	34.07	34.36	43	T24R3	20.02	20.3433	20.2933	-0.34	1.26576
44	T24R3	34.07			44	T24R3	20.06
45	T24R3	28.99			45	T24R3	20.95

## Sheet: HEN1 QHWT
Gene					Housekeeping gene
HEN1					GAPDH
No. Muestra	Sample number	Day/replicate	Ct	AVERAGE Ct	AVERAGE Ct at C0	Sample number	Day/Replicate	Ct	AVERAGE Ct	AVERAGE Ct at C0	ΔΔCT	2^(-ΔΔCT)	Fold Change	Standard Deviation 2^(-ΔΔCT)	Standard Error 2^(-ΔΔCT)
1	QHWT 0 h/Biological sample 1/Replicate 1	NeuN	34.535	34.535	1	QHWT 0 h/Biological sample 1/Replicate 1	22.18	22.2767	22.2767	0	1	1	0	0
2	QHWT 0 h/Biological sample 1/Replicate 2	36.28			2	QHWT 0 h/Biological sample 1/Replicate 2	22.31
3	QHWT 0 h/Biological sample 1/Replicate 3	NeuN			3	QHWT 0 h/Biological sample 1/Replicate 3	22.34
4	QHWT 0 h/Biological sample 2/Replicate 1	NeuN	34.535	34.535	4	QHWT 0 h/Biological sample 2/Replicate 1	21.4	21.8167	21.8167	0	1
5	QHWT 0 h/Biological sample 2/Replicate 2	34.83			5	QHWT 0 h/Biological sample 2/Replicate 2	21.93
6	QHWT 0 h/Biological sample 2/Replicate 3	34.24			6	QHWT 0 h/Biological sample 2/Replicate 3	22.12
7	QHWT 0 h/Biological sample 3/Replicate 1	34.29	34.36	34.36	7	QHWT 0 h/Biological sample 3/Replicate 1	20.23	20.2933	20.2933	0	1
8	QHWT 0 h/Biological sample 3/Replicate 2	34.66			8	QHWT 0 h/Biological sample 3/Replicate 2	20.36
9	QHWT 0 h/Biological sample 3/Replicate 3	34.13			9	QHWT 0 h/Biological sample 3/Replicate 3	20.29
10	QHWT 1 h/Biological sample 1/Replicate 1	34.93	34.7	34.535	10	QHWT 1 h/Biological sample 1/Replicate 1	21.01	21.0067	22.2767	1.435	0.369847	2.39383	2.86235	1.5827
11	QHWT 1 h/Biological sample 1/Replicate 2	34.47			11	QHWT 1 h/Biological sample 1/Replicate 2	20.79
12	QHWT 1 h/Biological sample 1/Replicate 3	33.19			12	QHWT 1 h/Biological sample 1/Replicate 3	21.22
13	QHWT 1 h/Biological sample 2/Replicate 1	20.71	20.775	34.535	13	QHWT 1 h/Biological sample 2/Replicate 1	20.98	21.06	21.8167	-13.0033	8210.95
14	QHWT 1 h/Biological sample 2/Replicate 2	19.27			14	QHWT 1 h/Biological sample 2/Replicate 2	20.95
15	QHWT 1 h/Biological sample 2/Replicate 3	20.84			15	QHWT 1 h/Biological sample 2/Replicate 3	21.25
16	QHWT 1 h/Biological sample 3/Replicate 1	32.22	32.3633	34.36	16	QHWT 1 h/Biological sample 3/Replicate 1	20.24	20.44	20.2933	-2.14333	4.41782
17	QHWT 1 h/Biological sample 3/Replicate 2	32.4			17	QHWT 1 h/Biological sample 3/Replicate 2	20.19
18	QHWT 1 h/Biological sample 3/Replicate 3	32.47			18	QHWT 1 h/Biological sample 3/Replicate 3	20.89
19	QHWT 3 h/Biological sample 1/Replicate 1	29.93	30.1633	34.535	19	QHWT 3 h/Biological sample 1/Replicate 1	20.1	20.1433	22.2767	-2.23833	4.71852	4.38952	0.465269	0.1933
20	QHWT 3 h/Biological sample 1/Replicate 2	30.11			20	QHWT 3 h/Biological sample 1/Replicate 2	20.11
21	QHWT 3 h/Biological sample 1/Replicate 3	30.45			21	QHWT 3 h/Biological sample 1/Replicate 3	20.22
22	QHWT 3 h/Biological sample 2/Replicate 1	30.53	30.64	34.535	22	QHWT 3 h/Biological sample 2/Replicate 1	20.04	19.9433	21.8167	-2.02167	4.06053
23	QHWT 3 h/Biological sample 2/Replicate 2	30.51			23	QHWT 3 h/Biological sample 2/Replicate 2	19.77
24	QHWT 3 h/Biological sample 2/Replicate 3	30.88			24	QHWT 3 h/Biological sample 2/Replicate 3	20.02
25	QHWT 3 h/Biological sample 3/Replicate 1	29.68	29.5133	34.36	25	QHWT 3 h/Biological sample 3/Replicate 1	20.35	20.1833	20.2933	-4.73667	26.6611
26	QHWT 3 h/Biological sample 3/Replicate 2	29.35			26	QHWT 3 h/Biological sample 3/Replicate 2	19.93
27	QHWT 3 h/Biological sample 3/Replicate 3	29.51			27	QHWT 3 h/Biological sample 3/Replicate 3	20.27
28	QHWT 6 h/Biological sample 1/Replicate 1	29.21	24.15	34.535	28	QHWT 6 h/Biological sample 1/Replicate 1	20.28	20.35	22.2767	-8.45833	351.732	19.2655	9.51287	0.7011
29	QHWT 6 h/Biological sample 1/Replicate 2	24.62			29	QHWT 6 h/Biological sample 1/Replicate 2	20.22
30	QHWT 6 h/Biological sample 1/Replicate 3	23.68			30	QHWT 6 h/Biological sample 1/Replicate 3	20.55
31	QHWT 6 h/Biological sample 2/Replicate 1	28.89	28.9	34.535	31	QHWT 6 h/Biological sample 2/Replicate 1	19.91	19.83	21.8167	-3.64833	12.5389
32	QHWT 6 h/Biological sample 2/Replicate 2	28.7			32	QHWT 6 h/Biological sample 2/Replicate 2	19.67
33	QHWT 6 h/Biological sample 2/Replicate 3	29.11			33	QHWT 6 h/Biological sample 2/Replicate 3	19.91
34	QHWT 6 h/Biological sample 3/Replicate 1	29.46	29.37	34.36	34	QHWT 6 h/Biological sample 3/Replicate 1	20.2	20.0033	20.2933	-4.7	25.9921
35	QHWT 6 h/Biological sample 3/Replicate 2	28.75			35	QHWT 6 h/Biological sample 3/Replicate 2	19.7
36	QHWT 6 h/Biological sample 3/Replicate 3	29.28			36	QHWT 6 h/Biological sample 3/Replicate 3	20.11
37	QHWT 24 h/Biological sample 1/Replicate 1	32.35	32.02	34.535	37	QHWT 24 h/Biological sample 1/Replicate 1	21.41	21.1833	22.2767	-1.42167	2.67895	1.97235	0.999277	7.9454
38	QHWT 24 h/Biological sample 1/Replicate 2	31.69			38	QHWT 24 h/Biological sample 1/Replicate 2	21.03
39	QHWT 24 h/Biological sample 1/Replicate 3	30.73			39	QHWT 24 h/Biological sample 1/Replicate 3	21.11
40	QHWT 24 h/Biological sample 2/Replicate 1	30.37	30.04	34.535	40	QHWT 24 h/Biological sample 2/Replicate 1	19.16	19.44	21.8167	-2.11833	4.34192
41	QHWT 24 h/Biological sample 2/Replicate 2	29.71			41	QHWT 24 h/Biological sample 2/Replicate 2	19.15
42	QHWT 24 h/Biological sample 2/Replicate 3	29.16			42	QHWT 24 h/Biological sample 2/Replicate 3	20.01
43	QHWT 24 h/Biological sample 3/Replicate 1	34.07	34.07	34.36	43	QHWT 24 h/Biological sample 3/Replicate 1	20.02	20.3433	20.2933	-0.34	1.26576
44	QHWT 24 h/Biological sample 3/Replicate 2	34.07			44	QHWT 24 h/Biological sample 3/Replicate 2	20.06
45	QHWT 24 h/Biological sample 3/Replicate 3	28.99			45	QHWT 24 h/Biological sample 3/Replicate 3	20.95
Tiempo	ER	DE
T0	1	0
T1	2.39383	2.86235
T3	4.38952	0.465269
T6	19.2655	9.51287
T24	1.97235	0.999277

[truncated: 6 more sheets: AGO6 Control, AGO6 QHWT, AGO4 Control, AGO4 QHWT, DCL3 Control, DCL3 QHWT]
